# Supplementary material for: A small set of conserved genes, including sp5 and Hox, are activated by Wnt signaling in the posterior of planarians and acoels
Source: PLoS Genet. 2019 Oct 18;15(10):e1008401. doi: 10.1371/journal.pgen.1008401 (PMC6821139; doi:10.1371/journal.pgen.1008401)
Supplement: S3 Table — (XLSX) [file pgen.1008401.s003.xlsx]

## Sheet: day 4 no irradiation 
	id	baseMean	baseMeanA	baseMeanB	foldChange	log2FoldChange	pval	padj
1	dd_Smed_v6_10001_0_1	118.68	103.977	133.383	1.28282	0.359316	0.364588	1
2	dd_Smed_v6_10002_0_1	212.226	205.28	219.172	1.06767	0.0944688	0.756881	1
3	dd_Smed_v6_10003_0_1	519.24	485.171	553.309	1.14044	0.189591	0.418345	1
4	dd_Smed_v6_10004_0_1	361.463	359.06	363.866	1.01339	0.0191835	0.884592	1
5	dd_Smed_v6_10005_0_1	68.5957	70.2012	66.9902	0.95426	-0.0675453	0.996264	1
6	dd_Smed_v6_10006_0_1	106.003	101.441	110.566	1.08995	0.124268	0.673837	1
7	dd_Smed_v6_10007_0_1	305.381	289.083	321.678	1.11275	0.154134	0.472383	1
8	dd_Smed_v6_1000_0_1	4142.55	4437.62	3847.47	0.867013	-0.205875	0.327058	1
9	dd_Smed_v6_10010_0_1	255.791	254.807	256.776	1.00772	0.0111011	0.98323	1
10	dd_Smed_v6_10011_0_1	474.674	487.77	461.578	0.946303	-0.079626	0.72195	1
11	dd_Smed_v6_10013_0_1	298.759	279.955	317.562	1.13434	0.181848	0.508385	1
12	dd_Smed_v6_10014_0_1	58.5053	48.6894	68.3212	1.40321	0.488726	0.197382	1
13	dd_Smed_v6_10015_0_1	233.608	241.222	225.995	0.936873	-0.0940742	0.748258	1
14	dd_Smed_v6_10016_0_1	407.672	402.944	412.4	1.02347	0.0334651	0.818991	1
15	dd_Smed_v6_10017_0_1	73.7125	70.5782	76.8468	1.08882	0.122762	0.723879	1
16	dd_Smed_v6_10018_0_1	369.646	379.854	359.437	0.94625	-0.0797069	0.793431	1
17	dd_Smed_v6_10019_0_1	119.06	105.894	132.227	1.24867	0.320389	0.231227	1
18	dd_Smed_v6_1001_0_1	3209.36	3295.7	3123.03	0.947609	-0.0776359	0.790777	1
19	dd_Smed_v6_10020_0_1	241.722	238.674	244.769	1.02554	0.0363828	0.838981	1
20	dd_Smed_v6_10021_0_1	126.635	127.278	125.991	0.989887	-0.0146645	0.891846	1
21	dd_Smed_v6_10022_0_1	331.832	329.397	334.267	1.01479	0.0211768	1	1
22	dd_Smed_v6_10024_0_1	671.028	569.956	772.1	1.35467	0.437937	0.0247358	1
23	dd_Smed_v6_10025_0_1	97.4887	98.8781	96.0993	0.971896	-0.0411255	0.689275	1
24	dd_Smed_v6_10026_0_1	153.619	161.763	145.475	0.899311	-0.153108	0.63214	1
25	dd_Smed_v6_10027_0_1	255.439	238.062	272.815	1.14598	0.196584	0.397955	1
26	dd_Smed_v6_10028_0_1	74.7896	62.3384	87.2408	1.39947	0.484882	0.527028	1
27	dd_Smed_v6_10029_0_1	696.253	709.986	682.52	0.961314	-0.0569208	0.776365	1
28	dd_Smed_v6_1002_0_1	3681.16	3898.38	3463.94	0.888558	-0.170462	0.346477	1
29	dd_Smed_v6_10030_0_1	250.446	223.953	276.938	1.23659	0.306367	0.306319	1
30	dd_Smed_v6_10031_0_1	231.633	231.965	231.3	0.997133	-0.00414248	0.954342	1
31	dd_Smed_v6_10032_0_1	292.99	306.17	279.811	0.913909	-0.129877	0.615053	1
32	dd_Smed_v6_10033_0_1	230.573	239.754	221.392	0.92341	-0.114956	0.611418	1
33	dd_Smed_v6_10034_0_1	435.428	432.256	438.599	1.01467	0.0210173	0.819145	1
34	dd_Smed_v6_10035_0_1	329.332	289.359	369.304	1.27628	0.351946	0.457451	1
35	dd_Smed_v6_10036_0_1	235.084	233.545	236.622	1.01317	0.0188821	0.954297	1
36	dd_Smed_v6_10037_0_1	284.936	260.947	308.925	1.18386	0.243499	0.426121	1
37	dd_Smed_v6_10038_0_1	250.237	255.945	244.529	0.955398	-0.0658264	0.807566	1
38	dd_Smed_v6_10039_0_1	100.019	106.692	93.3456	0.874904	-0.192804	0.407781	1
39	dd_Smed_v6_1003_0_1	87.7075	161.727	13.6875	0.0846332	-3.56263	0.0100802	1
40	dd_Smed_v6_10040_0_1	69.1286	77.6445	60.6128	0.780644	-0.357263	0.243996	1
41	dd_Smed_v6_10041_0_1	800.293	796.488	804.099	1.00956	0.0137197	0.946325	1
42	dd_Smed_v6_10042_0_1	466.135	470.074	462.196	0.983242	-0.0243816	0.89093	1
43	dd_Smed_v6_10043_0_1	194.421	201.319	187.523	0.931471	-0.102417	0.543985	1
44	dd_Smed_v6_10044_0_1	88.6168	89.3197	87.9139	0.984261	-0.0228874	0.89877	1
45	dd_Smed_v6_10045_0_1	362.417	363.291	361.544	0.995189	-0.00695749	0.950185	1
46	dd_Smed_v6_10046_0_1	144.438	135.438	153.439	1.13291	0.180034	0.39164	1
47	dd_Smed_v6_10047_0_1	96.6343	81.468	111.801	1.37232	0.456621	0.153941	1
48	dd_Smed_v6_10048_0_1	506.727	527.471	485.983	0.921346	-0.118184	0.626706	1
49	dd_Smed_v6_10049_0_1	196.873	192.676	201.071	1.04357	0.0615275	0.73555	1
50	dd_Smed_v6_1004_0_1	5863.67	5921.14	5806.21	0.98059	-0.0282785	0.871	1
51	dd_Smed_v6_10050_0_1	62.8634	53.8448	71.8819	1.33498	0.416821	0.749268	1
52	dd_Smed_v6_10051_0_1	328.704	353.531	303.878	0.859552	-0.218344	0.239434	1
53	dd_Smed_v6_10052_0_1	244.138	232.128	256.147	1.10347	0.142052	0.47611	1
54	dd_Smed_v6_10053_0_1	178.591	151.135	206.046	1.36332	0.447123	0.430825	1
55	dd_Smed_v6_10054_0_1	256.295	228.045	284.546	1.24776	0.319341	0.444672	1
56	dd_Smed_v6_10055_0_1	162.043	165.061	159.025	0.963428	-0.0537507	0.869617	1
57	dd_Smed_v6_10056_0_1	224.382	197.167	251.596	1.27605	0.35169	0.175454	1
58	dd_Smed_v6_10058_0_1	525.941	518.86	533.022	1.02729	0.0388491	0.802044	1
59	dd_Smed_v6_10059_0_1	443.486	483.573	403.4	0.834208	-0.261521	0.185248	1
60	dd_Smed_v6_10060_0_1	138.706	113.613	163.8	1.44174	0.527809	0.354041	1
61	dd_Smed_v6_10061_0_1	331.211	318.827	343.596	1.07769	0.107938	0.57591	1
62	dd_Smed_v6_10062_0_1	633.192	626.277	640.108	1.02208	0.0315145	0.797158	1
63	dd_Smed_v6_10064_0_1	241.474	238.213	244.734	1.02737	0.0389592	0.754069	1
64	dd_Smed_v6_10065_0_1	393.106	412.831	373.381	0.904439	-0.144905	0.58534	1
65	dd_Smed_v6_10066_0_1	494.143	511.662	476.623	0.931519	-0.102342	0.653656	1
66	dd_Smed_v6_10067_0_1	20.7125	18.4148	23.0103	1.24956	0.321417	0.808201	1
67	dd_Smed_v6_10068_0_1	177.305	167.964	186.646	1.11122	0.152148	0.57683	1
68	dd_Smed_v6_10069_0_1	461.346	473.362	449.331	0.949234	-0.0751644	0.837897	1
69	dd_Smed_v6_1006_0_1	4224.77	4313.78	4135.76	0.958733	-0.0607983	0.863411	1
70	dd_Smed_v6_10070_0_1	439.102	481.664	396.541	0.823273	-0.280558	0.199599	1
71	dd_Smed_v6_10072_0_1	697.087	614.929	779.245	1.26721	0.341656	0.094247	1
72	dd_Smed_v6_10073_0_1	323.992	320.076	327.909	1.02447	0.0348793	0.83785	1
73	dd_Smed_v6_10074_0_1	425.896	418.435	433.358	1.03566	0.0505567	0.909515	1
74	dd_Smed_v6_10075_0_1	456.224	463.986	448.461	0.96654	-0.0490987	0.933066	1
75	dd_Smed_v6_10076_0_1	22.8395	17.2841	28.395	1.64284	0.716189	0.307898	1
76	dd_Smed_v6_10078_0_1	328.505	342.328	314.683	0.919246	-0.121477	0.634969	1
77	dd_Smed_v6_10079_0_1	334.381	342.554	326.208	0.952281	-0.0705402	0.822485	1
78	dd_Smed_v6_1007_0_1	3172.54	3265.52	3079.56	0.943051	-0.0845923	0.697659	1
79	dd_Smed_v6_10081_0_1	138.238	132.386	144.089	1.0884	0.122205	0.709328	1
80	dd_Smed_v6_10082_0_1	486.18	486.668	485.692	0.997995	-0.00289565	0.939307	1
81	dd_Smed_v6_10083_0_1	242.617	254.613	230.621	0.905769	-0.142785	0.590813	1
82	dd_Smed_v6_10084_0_1	23.8595	29.4244	18.2947	0.621752	-0.685589	0.144348	1
83	dd_Smed_v6_10086_0_1	506.614	496.408	516.82	1.04112	0.0581362	0.770385	1
84	dd_Smed_v6_10087_0_1	520.343	530.101	510.585	0.963186	-0.0541141	0.798254	1
85	dd_Smed_v6_10088_0_1	65.2104	68.2254	62.1954	0.911616	-0.133502	0.639416	1
86	dd_Smed_v6_10089_0_1	228.148	216.932	239.365	1.10341	0.141964	0.478794	1
87	dd_Smed_v6_1008_0_1	7170.24	8051.31	6289.16	0.781136	-0.356355	0.0505383	1
88	dd_Smed_v6_10090_0_1	91.9841	79.9129	104.055	1.30211	0.380848	0.445599	1
89	dd_Smed_v6_10092_0_1	304.908	273.319	336.498	1.23115	0.300009	0.218128	1
90	dd_Smed_v6_10093_0_1	167.664	144.385	190.943	1.32246	0.40322	0.446067	1
91	dd_Smed_v6_10094_0_1	425.231	395.775	454.687	1.14885	0.200194	0.384048	1
92	dd_Smed_v6_10095_0_1	258.456	246.722	270.19	1.09512	0.131089	0.604411	1
93	dd_Smed_v6_10096_0_1	371.143	372.968	369.318	0.990214	-0.0141879	0.987014	1
94	dd_Smed_v6_10097_0_1	332.817	342.194	323.441	0.945199	-0.0813095	0.780198	1
95	dd_Smed_v6_10098_0_1	30.6812	30.5658	30.7966	1.00755	0.0108535	0.907041	1
96	dd_Smed_v6_10099_0_1	180.16	191.547	168.773	0.881102	-0.182619	0.48284	1
97	dd_Smed_v6_1009_0_1	3284.89	3473.19	3096.59	0.89157	-0.165579	0.404182	1
98	dd_Smed_v6_1009_1_1	485.99	509.283	462.697	0.908527	-0.138399	0.449502	1
99	dd_Smed_v6_100_0_1	45885.5	50872.7	40898.4	0.803936	-0.314848	0.0935832	1
100	dd_Smed_v6_10100_0_1	243.512	233.382	253.642	1.08681	0.120098	0.668993	1
101	dd_Smed_v6_10101_0_1	117.55	117.831	117.268	0.995227	-0.00690241	0.972937	1
102	dd_Smed_v6_10102_0_1	171.729	172.159	171.298	0.995001	-0.00723048	0.907979	1
103	dd_Smed_v6_10103_0_1	533.408	545.29	521.526	0.956419	-0.0642854	0.80683	1
104	dd_Smed_v6_10104_0_1	59.1264	48.5959	69.6568	1.43339	0.51943	0.0884036	1
105	dd_Smed_v6_10105_0_1	592.421	582.06	602.782	1.0356	0.0504688	0.850131	1
106	dd_Smed_v6_10106_0_1	208.003	212.612	203.393	0.956635	-0.0639596	0.790299	1
107	dd_Smed_v6_10107_0_1	402.21	408.73	395.691	0.968098	-0.0467746	0.798116	1
108	dd_Smed_v6_10108_0_1	371.117	360.488	381.747	1.05897	0.0826643	0.711342	1
109	dd_Smed_v6_10109_0_1	81.4115	67.4187	95.4043	1.4151	0.500905	0.467979	1
110	dd_Smed_v6_1010_0_1	9279.19	10245	8313.37	0.811456	-0.301415	0.135739	1
111	dd_Smed_v6_10110_0_1	334.326	330.876	337.777	1.02086	0.0297797	0.941078	1
112	dd_Smed_v6_10111_0_1	61.816	57.8288	65.8033	1.1379	0.186372	0.555063	1
113	dd_Smed_v6_10112_0_1	484.295	522.277	446.313	0.854552	-0.22676	0.471949	1
114	dd_Smed_v6_10113_0_1	278.314	284.648	271.98	0.955496	-0.0656788	0.756123	1
115	dd_Smed_v6_10115_0_1	540.63	544.262	536.999	0.986655	-0.0193824	0.972413	1
116	dd_Smed_v6_10116_0_1	498.31	505.031	491.59	0.973385	-0.0389182	0.839212	1
117	dd_Smed_v6_10117_0_1	538.16	530.996	545.324	1.02698	0.0384128	0.825355	1
118	dd_Smed_v6_10119_0_1	497.292	514.647	479.937	0.932555	-0.100739	0.690854	1
119	dd_Smed_v6_1011_0_1	455.045	391.435	518.655	1.32501	0.406	0.654779	1
120	dd_Smed_v6_10120_0_1	369.108	350.608	387.608	1.10553	0.144736	0.589457	1
121	dd_Smed_v6_10121_0_1	395.95	412.305	379.595	0.920665	-0.119251	0.575831	1
122	dd_Smed_v6_10122_0_1	125.988	121.187	130.79	1.07924	0.110012	0.662617	1
123	dd_Smed_v6_10123_0_1	159.639	123.129	196.15	1.59304	0.671781	0.23925	1
124	dd_Smed_v6_10124_0_1	180.034	178.561	181.508	1.0165	0.0236109	0.93654	1
125	dd_Smed_v6_10126_0_1	36.1259	36.407	35.8448	0.984559	-0.0224506	0.988672	1
126	dd_Smed_v6_10127_0_1	232.565	230.633	234.496	1.01675	0.0239643	0.958103	1
127	dd_Smed_v6_10128_0_1	295.847	252.802	338.891	1.34054	0.422811	0.355357	1
128	dd_Smed_v6_10129_0_1	395.401	420.35	370.451	0.881292	-0.182307	0.415571	1
129	dd_Smed_v6_1012_0_1	3718.44	3751.49	3685.39	0.982381	-0.025646	0.907413	1
130	dd_Smed_v6_10130_0_1	555.821	611.124	500.517	0.819011	-0.288044	0.159409	1
131	dd_Smed_v6_10131_0_1	339.048	345.515	332.581	0.962567	-0.0550412	0.871589	1
132	dd_Smed_v6_10132_0_1	289.961	304.058	275.864	0.907273	-0.140391	0.566059	1
133	dd_Smed_v6_10133_0_1	332.195	346.221	318.17	0.918981	-0.121893	0.637883	1
134	dd_Smed_v6_10134_0_1	287.27	284.548	289.991	1.01913	0.0273335	0.947645	1
135	dd_Smed_v6_10135_0_1	596.3	596.728	595.872	0.998566	-0.00207042	0.987202	1
136	dd_Smed_v6_10136_0_1	228.797	221.299	236.294	1.06776	0.0945889	0.731009	1
137	dd_Smed_v6_10138_0_10	70.9335	74.2053	67.6617	0.911817	-0.133183	0.796609	1
138	dd_Smed_v6_10139_0_1	169.794	165.365	174.222	1.05356	0.0752751	0.815273	1
139	dd_Smed_v6_1013_0_1	3615	3270.75	3959.26	1.21051	0.275613	0.145633	1
140	dd_Smed_v6_10140_0_1	382.851	397.404	368.298	0.926759	-0.109734	0.633201	1
141	dd_Smed_v6_10141_0_1	273.927	271.788	276.067	1.01574	0.0225368	0.964456	1
142	dd_Smed_v6_10142_0_1	363.992	366.506	361.478	0.986281	-0.0199299	0.944182	1
143	dd_Smed_v6_10143_0_1	377.828	376.326	379.331	1.00799	0.0114743	0.878896	1
144	dd_Smed_v6_10144_0_1	429.223	422.191	436.256	1.03331	0.0472769	0.810981	1
145	dd_Smed_v6_10145_0_1	273.343	260.493	286.193	1.09866	0.13574	0.727634	1
146	dd_Smed_v6_10146_0_1	110.673	99.9951	121.352	1.21358	0.279266	0.52573	1
147	dd_Smed_v6_10147_0_1	442.926	421.126	464.726	1.10353	0.142129	0.536321	1
148	dd_Smed_v6_10148_0_1	474.547	476.61	472.484	0.991343	-0.0125432	0.995371	1
149	dd_Smed_v6_10149_0_1	167.935	164.96	170.909	1.03607	0.0511185	0.788172	1
150	dd_Smed_v6_10150_0_1	92.8983	92.0735	93.723	1.01791	0.0256168	0.970141	1
151	dd_Smed_v6_10151_0_1	369.121	369.751	368.491	0.996593	-0.00492371	0.957615	1
152	dd_Smed_v6_10152_0_1	254.187	247.895	260.479	1.05076	0.0714372	0.716134	1
153	dd_Smed_v6_10153_0_1	34.4176	25.4671	43.3681	1.70291	0.767999	0.028855	1
154	dd_Smed_v6_10155_0_1	355.345	358.562	352.128	0.982055	-0.0261238	0.974145	1
155	dd_Smed_v6_10156_0_1	596.661	638.532	554.79	0.868853	-0.202816	0.348013	1
156	dd_Smed_v6_10157_0_1	81.6832	84.434	78.9324	0.934842	-0.097206	0.730572	1
157	dd_Smed_v6_10158_0_1	135.08	141.826	128.334	0.90487	-0.144218	0.584461	1
158	dd_Smed_v6_10159_0_1	302.267	287.291	317.243	1.10426	0.143074	0.595168	1
159	dd_Smed_v6_1015_0_1	879.485	938.892	820.078	0.873454	-0.195197	0.407387	1
160	dd_Smed_v6_10160_0_1	292.66	321.108	264.213	0.822818	-0.281355	0.100855	1
161	dd_Smed_v6_10161_0_1	311.367	298.18	324.554	1.08845	0.122277	0.732669	1
162	dd_Smed_v6_10162_0_1	182.963	178.663	187.262	1.04813	0.067821	0.699212	1
163	dd_Smed_v6_10163_0_1	251.97	253.254	250.686	0.989857	-0.0147076	0.982439	1
164	dd_Smed_v6_10164_0_1	414.418	423.624	405.212	0.956537	-0.0641074	0.807068	1
165	dd_Smed_v6_10165_0_1	439.528	410.29	468.765	1.14252	0.192221	0.362712	1
166	dd_Smed_v6_10166_0_10	132.889	129.876	135.901	1.04639	0.0654241	0.742862	1
167	dd_Smed_v6_10167_0_1	346.246	367.949	324.543	0.882032	-0.181096	0.418787	1
168	dd_Smed_v6_10168_0_1	116.505	103.944	129.067	1.2417	0.312315	0.671562	1
169	dd_Smed_v6_10169_0_1	368.564	365.376	371.753	1.01745	0.0249634	0.833534	1
170	dd_Smed_v6_1016_0_1	1529.83	1608.75	1450.91	0.901886	-0.148983	0.417087	1
171	dd_Smed_v6_10170_0_1	296.58	294.663	298.497	1.01301	0.0186511	0.946967	1
172	dd_Smed_v6_10171_0_1	324.837	329.688	319.987	0.970576	-0.0430872	0.869737	1
173	dd_Smed_v6_10173_0_1	227.896	242.731	213.061	0.877765	-0.188093	0.480811	1
174	dd_Smed_v6_10174_0_1	143.495	130.601	156.389	1.19746	0.259972	0.549345	1
175	dd_Smed_v6_10175_0_1	249.949	261.229	238.668	0.913635	-0.130311	0.612161	1
176	dd_Smed_v6_10176_0_1	457.501	451.355	463.646	1.02723	0.0387591	0.715704	1
177	dd_Smed_v6_10178_0_1	43.7137	48.1172	39.3102	0.816967	-0.29165	0.394334	1
178	dd_Smed_v6_10179_0_1	68.2848	58.4646	78.1049	1.33593	0.417849	0.319069	1
179	dd_Smed_v6_1017_0_1	1128.56	1247.93	1009.2	0.808698	-0.306327	0.430721	1
180	dd_Smed_v6_10180_0_1	452.488	455.021	449.956	0.988868	-0.0161501	0.978477	1
181	dd_Smed_v6_10181_0_1	19.4539	16.2142	22.6935	1.3996	0.485017	0.321908	1
182	dd_Smed_v6_10182_0_1	220.119	213.24	226.998	1.06452	0.0902002	0.68996	1
183	dd_Smed_v6_10183_0_1	333.201	335.991	330.411	0.983391	-0.0241633	0.991872	1
184	dd_Smed_v6_10184_0_1	442.855	435.315	450.395	1.03464	0.0491294	0.765114	1
185	dd_Smed_v6_10185_0_1	306.389	304.892	307.886	1.00982	0.0140999	0.928073	1
186	dd_Smed_v6_10186_0_1	402.541	400.694	404.387	1.00921	0.0132326	0.88446	1
187	dd_Smed_v6_10187_0_1	206.903	205.502	208.304	1.01364	0.0195405	0.880356	1
188	dd_Smed_v6_10188_0_1	137.696	145.154	130.239	0.897249	-0.15642	0.52121	1
189	dd_Smed_v6_10189_0_1	344.175	319.103	369.246	1.15714	0.21056	0.291532	1
190	dd_Smed_v6_1018_0_1	1591.88	1570.99	1612.78	1.0266	0.0378775	0.932427	1
191	dd_Smed_v6_10190_0_1	179.838	172.381	187.295	1.08652	0.119709	0.836725	1
192	dd_Smed_v6_10191_0_1	111.079	122.576	99.5815	0.812403	-0.299732	0.281235	1
193	dd_Smed_v6_10192_0_1	420.151	423.198	417.105	0.985604	-0.0209206	0.946353	1
194	dd_Smed_v6_10193_0_1	204.419	194.635	214.203	1.10054	0.138205	0.553387	1
195	dd_Smed_v6_10194_0_1	167.27	186.527	148.012	0.793515	-0.33367	0.237027	1
196	dd_Smed_v6_10195_0_1	41.2283	41.6779	40.7786	0.978423	-0.0314694	0.923234	1
197	dd_Smed_v6_10196_0_1	38.2586	35.2142	41.3029	1.1729	0.230084	0.516448	1
198	dd_Smed_v6_10198_0_1	346.416	349.856	342.976	0.980335	-0.0286536	0.980195	1
199	dd_Smed_v6_10199_0_1	388.746	387.981	389.511	1.00394	0.00567785	0.992614	1
200	dd_Smed_v6_1019_0_1	2263.56	2431.27	2095.85	0.862036	-0.214179	0.254986	1
201	dd_Smed_v6_101_0_1	20007.8	21053.8	18961.8	0.900634	-0.150988	0.440337	1
202	dd_Smed_v6_10200_0_1	229.531	240.204	218.857	0.91113	-0.134271	0.618656	1
203	dd_Smed_v6_10201_0_1	250.075	246.204	253.946	1.03145	0.0446682	0.771998	1
204	dd_Smed_v6_10203_0_1	359.919	356.028	363.811	1.02186	0.0311974	0.854158	1
205	dd_Smed_v6_10205_0_1	550.319	517.438	583.2	1.12709	0.172604	0.442395	1
206	dd_Smed_v6_10206_0_1	245.772	243.093	248.452	1.02204	0.0314567	0.882069	1
207	dd_Smed_v6_10207_0_1	350.487	352.941	348.032	0.986091	-0.0202075	0.833935	1
208	dd_Smed_v6_10208_0_1	410.116	418.535	401.696	0.959767	-0.0592442	0.814119	1
209	dd_Smed_v6_10209_0_1	256.776	254.895	258.658	1.01476	0.0211418	0.992775	1
210	dd_Smed_v6_1020_0_1	2386.77	2284.69	2488.84	1.08936	0.123476	0.738333	1
211	dd_Smed_v6_10210_0_1	413.54	373.945	453.134	1.21177	0.277112	0.189087	1
212	dd_Smed_v6_10211_0_1	208.456	216.218	200.694	0.928203	-0.107488	0.569208	1
213	dd_Smed_v6_10212_0_1	135.558	126.731	144.386	1.13931	0.18816	0.493503	1
214	dd_Smed_v6_10214_0_1	696.555	670.218	722.892	1.07859	0.109151	0.6143	1
215	dd_Smed_v6_10215_0_1	114.288	118.57	110.007	0.92778	-0.108146	0.798778	1
216	dd_Smed_v6_10216_0_1	239.284	238.762	239.806	1.00437	0.00629249	1	1
217	dd_Smed_v6_10217_0_1	202.268	210.088	194.448	0.925555	-0.11161	0.841361	1
218	dd_Smed_v6_10218_0_1	364.325	357.455	371.194	1.03843	0.0544098	0.802601	1
219	dd_Smed_v6_10219_0_1	128.452	134.488	122.416	0.910236	-0.135687	0.710035	1
220	dd_Smed_v6_1021_0_1	10712.2	11669.4	9754.97	0.835941	-0.258526	0.190789	1
221	dd_Smed_v6_10220_0_1	308.343	309.812	306.875	0.990519	-0.0137432	0.922995	1
222	dd_Smed_v6_10221_0_1	298.31	303.471	293.149	0.965985	-0.0499274	0.775645	1
223	dd_Smed_v6_10222_0_1	317.758	317.561	317.956	1.00125	0.00179649	0.998495	1
224	dd_Smed_v6_10223_0_1	291.257	291.644	290.869	0.997342	-0.00383985	0.914821	1
225	dd_Smed_v6_10224_0_1	50.6918	57.4093	43.9744	0.76598	-0.384621	0.168775	1
226	dd_Smed_v6_10225_0_1	351.689	325.072	378.306	1.16376	0.218796	0.337594	1
227	dd_Smed_v6_10226_0_1	193.107	184.115	202.098	1.09767	0.134445	0.845262	1
228	dd_Smed_v6_10227_0_1	6.64136	7.60196	5.68077	0.747277	-0.420285	0.527351	1
229	dd_Smed_v6_10227_1_1	35.1384	38.0893	32.1875	0.845054	-0.242884	0.685645	1
230	dd_Smed_v6_10228_0_1	282.139	289.015	275.263	0.95242	-0.0703301	0.788265	1
231	dd_Smed_v6_10229_0_1	132.709	120.324	145.094	1.20586	0.270064	0.329427	1
232	dd_Smed_v6_1022_0_1	2995.04	3269.36	2720.72	0.832189	-0.265017	0.163918	1
233	dd_Smed_v6_10231_0_1	41.8153	39.8994	43.7312	1.09604	0.132297	0.669865	1
234	dd_Smed_v6_10232_0_1	246.474	219.376	273.572	1.24705	0.318515	0.518662	1
235	dd_Smed_v6_10233_0_1	460.296	437.965	482.627	1.10198	0.140094	0.490841	1
236	dd_Smed_v6_10235_0_1	315.203	315.884	314.523	0.995692	-0.0062286	0.980436	1
237	dd_Smed_v6_10236_0_1	215.641	220.687	210.596	0.954277	-0.0675197	0.882632	1
238	dd_Smed_v6_10237_0_1	138.159	139.636	136.683	0.978851	-0.0308389	0.984914	1
239	dd_Smed_v6_10238_0_1	154.002	146.912	161.091	1.09651	0.13292	0.636614	1
240	dd_Smed_v6_10239_0_1	156.334	165.312	147.356	0.891382	-0.165885	0.512574	1
241	dd_Smed_v6_1023_0_1	4511.56	4379.03	4644.1	1.06053	0.0847879	0.721584	1
242	dd_Smed_v6_10240_0_1	121.529	101.942	141.116	1.38428	0.469134	0.390195	1
243	dd_Smed_v6_10241_0_1	131.377	130.349	132.404	1.01576	0.0225621	0.899273	1
244	dd_Smed_v6_10242_0_1	51.1757	49.9958	52.3556	1.0472	0.0665377	0.871033	1
245	dd_Smed_v6_10243_0_1	283.447	292.898	273.995	0.935461	-0.0962501	0.610959	1
246	dd_Smed_v6_10244_0_1	436.222	445.324	427.12	0.959122	-0.0602134	0.818563	1
247	dd_Smed_v6_10245_0_1	59.4612	50.7218	68.2006	1.3446	0.427177	0.133562	1
248	dd_Smed_v6_10246_0_1	362.602	323.487	401.717	1.24183	0.312473	0.336437	1
249	dd_Smed_v6_10247_0_1	109.956	115.947	103.965	0.896657	-0.157373	0.406599	1
250	dd_Smed_v6_10248_0_1	388.407	406.738	370.077	0.909866	-0.136274	0.546889	1
251	dd_Smed_v6_10249_0_1	591.629	602.752	580.507	0.963095	-0.0542504	0.744536	1
252	dd_Smed_v6_1024_0_1	2700.46	2964.87	2436.05	0.821638	-0.283425	0.151529	1
253	dd_Smed_v6_10250_0_1	308.864	323.233	294.496	0.911096	-0.134326	0.721791	1
254	dd_Smed_v6_10251_0_1	190.921	206.513	175.33	0.849001	-0.236162	0.290434	1
255	dd_Smed_v6_10252_0_1	130.405	140.95	119.86	0.850377	-0.233825	0.371983	1
256	dd_Smed_v6_10253_0_1	201.013	206.086	195.939	0.950766	-0.0728375	0.740514	1
257	dd_Smed_v6_10255_0_1	242.93	239.205	246.656	1.03115	0.0442561	0.820582	1
258	dd_Smed_v6_10256_0_1	209.99	213.035	206.945	0.971413	-0.0418434	0.836832	1
259	dd_Smed_v6_10257_0_1	292.601	294.028	291.174	0.990292	-0.0140734	0.877275	1
260	dd_Smed_v6_10258_0_1	35.9096	34.1656	37.6536	1.10209	0.140242	0.551565	1
261	dd_Smed_v6_10259_0_1	518.172	462.485	573.859	1.24082	0.311289	0.0948133	1
262	dd_Smed_v6_1025_0_1	8270.66	8370.26	8171.06	0.976201	-0.0347493	0.848437	1
263	dd_Smed_v6_10260_0_1	305.938	277.105	334.77	1.2081	0.27274	0.182155	1
264	dd_Smed_v6_10261_0_1	173.11	183.792	162.427	0.883754	-0.178284	0.44343	1
265	dd_Smed_v6_10262_0_1	179.279	170.725	187.833	1.10021	0.137774	0.555436	1
266	dd_Smed_v6_10263_0_1	244.468	239.026	249.91	1.04553	0.0642382	0.756969	1
267	dd_Smed_v6_10264_0_1	103.736	103.732	103.741	1.00009	0.000124029	0.950338	1
268	dd_Smed_v6_10265_0_1	338.671	344.854	332.489	0.964143	-0.0526813	0.882753	1
269	dd_Smed_v6_10266_0_1	204.755	209.994	199.517	0.950107	-0.0738378	0.754013	1
270	dd_Smed_v6_10267_0_1	122.417	141.509	103.324	0.730159	-0.453717	0.0604598	1
271	dd_Smed_v6_10268_0_1	169.339	137.763	200.915	1.45841	0.544396	0.446436	1
272	dd_Smed_v6_10269_0_1	131.086	142.93	119.242	0.834269	-0.261415	0.3597	1
273	dd_Smed_v6_1026_0_1	7738.85	7992.51	7485.19	0.936525	-0.09461	0.725281	1
274	dd_Smed_v6_10270_0_1	197.661	189.256	206.067	1.08883	0.122777	0.80327	1
275	dd_Smed_v6_10271_0_1	432.718	413.699	451.736	1.09194	0.126899	0.511594	1
276	dd_Smed_v6_10272_0_1	344.489	351.531	337.446	0.959933	-0.058995	0.770595	1
277	dd_Smed_v6_10273_0_1	431.551	420.159	442.944	1.05423	0.0761887	0.732534	1
278	dd_Smed_v6_10275_0_1	98.616	107.527	89.705	0.834256	-0.261438	0.341295	1
279	dd_Smed_v6_10276_0_1	364.488	329.859	399.117	1.20997	0.274966	0.209103	1
280	dd_Smed_v6_10277_0_1	128.918	116.865	140.971	1.20627	0.270551	0.186693	1
281	dd_Smed_v6_10278_0_1	273.787	270.636	276.938	1.02329	0.0332135	0.909073	1
282	dd_Smed_v6_10279_0_1	248.111	230.534	265.688	1.15249	0.204752	0.407871	1
283	dd_Smed_v6_1027_0_1	9637.22	10140.9	9133.51	0.900659	-0.150947	0.484397	1
284	dd_Smed_v6_10280_0_1	354.56	363.393	345.728	0.951389	-0.0718935	0.793656	1
285	dd_Smed_v6_10281_0_1	186.547	199.792	173.301	0.867408	-0.205217	0.474935	1
286	dd_Smed_v6_10282_0_1	564.142	573.805	554.48	0.966322	-0.0494234	0.838903	1
287	dd_Smed_v6_10284_0_1	133.793	127.011	140.575	1.1068	0.146395	0.650402	1
288	dd_Smed_v6_10285_0_1	62.6791	69.6547	55.7036	0.799711	-0.322449	0.272117	1
289	dd_Smed_v6_10286_0_1	667.191	553.287	781.095	1.41174	0.497471	0.0534457	1
290	dd_Smed_v6_10287_0_1	138.367	114.242	162.492	1.42236	0.508284	0.0524929	1
291	dd_Smed_v6_10288_0_1	432.946	469.221	396.672	0.845384	-0.242321	0.240715	1
292	dd_Smed_v6_10289_0_1	287.707	296.597	278.817	0.940052	-0.0891878	0.820387	1
8500	dd_Smed_v6_2688_0_1	1662.18	2881.85	442.505	0.153549	-2.70323	4.42579e-24	3.8095e-20
294	dd_Smed_v6_10290_0_1	377.155	363.022	391.287	1.07786	0.108168	0.721501	1
295	dd_Smed_v6_10291_0_1	335.436	304.318	366.554	1.20451	0.268445	0.27525	1
296	dd_Smed_v6_10292_0_1	389.299	401.498	377.099	0.93923	-0.090449	0.706523	1
297	dd_Smed_v6_10293_0_1	194.269	188.909	199.628	1.05674	0.0796229	0.923619	1
298	dd_Smed_v6_10294_0_1	320.693	339.741	301.645	0.887868	-0.171582	0.480686	1
299	dd_Smed_v6_10295_0_1	81.9521	81.1787	82.7256	1.01906	0.0272332	1	1
300	dd_Smed_v6_10296_0_1	80.778	72.91	88.6461	1.21583	0.28194	0.723026	1
301	dd_Smed_v6_10299_0_1	20.3592	17.755	22.9634	1.29335	0.371113	0.367053	1
302	dd_Smed_v6_1029_0_1	1159.95	1018.79	1301.12	1.27713	0.3529	0.192276	1
303	dd_Smed_v6_1029_1_1	2969.27	3230.68	2707.87	0.838173	-0.254679	0.176758	1
304	dd_Smed_v6_102_0_1	1513.88	1527.62	1500.15	0.982017	-0.0261802	0.926673	1
305	dd_Smed_v6_10301_0_1	135.604	117.605	153.603	1.3061	0.38526	0.1648	1
306	dd_Smed_v6_10302_0_1	485.815	501.348	470.282	0.938035	-0.0922865	0.680837	1
307	dd_Smed_v6_10304_0_1	453.341	448.948	457.734	1.01957	0.0279623	0.939319	1
308	dd_Smed_v6_10305_0_1	19.5979	19.1387	20.0571	1.04799	0.067622	0.799905	1
309	dd_Smed_v6_10306_0_1	675.868	627.463	724.274	1.15429	0.207006	0.359321	1
310	dd_Smed_v6_10308_0_1	524.626	515.235	534.017	1.03645	0.0516544	0.826215	1
311	dd_Smed_v6_10309_0_1	142.867	121.089	164.646	1.35971	0.443303	0.260257	1
312	dd_Smed_v6_1030_0_1	766.187	668.763	863.611	1.29136	0.368887	0.591572	1
313	dd_Smed_v6_10310_0_1	449.762	463.252	436.272	0.94176	-0.0865688	0.753019	1
314	dd_Smed_v6_10311_0_1	152.306	133.924	170.687	1.2745	0.349935	0.408655	1
315	dd_Smed_v6_10312_0_1	157.143	158.616	155.669	0.981417	-0.0270612	0.925958	1
316	dd_Smed_v6_10313_0_1	267.802	266.005	269.599	1.01351	0.0193611	0.942779	1
317	dd_Smed_v6_10314_0_1	194.197	189.452	198.943	1.05009	0.070518	0.783045	1
318	dd_Smed_v6_10315_0_1	414.358	409.973	418.744	1.02139	0.0305407	0.76844	1
319	dd_Smed_v6_10316_0_1	153.267	155.722	150.811	0.968461	-0.046234	0.752712	1
320	dd_Smed_v6_10318_0_1	554.646	619.332	489.961	0.791113	-0.338045	0.159594	1
321	dd_Smed_v6_10319_0_1	440.198	427.228	453.168	1.06072	0.0850383	0.645915	1
322	dd_Smed_v6_1031_0_1	5490.37	5389.1	5591.64	1.03758	0.0532268	0.819266	1
323	dd_Smed_v6_10320_0_1	203.207	191.32	215.094	1.12426	0.168977	0.411005	1
324	dd_Smed_v6_10322_0_1	475.849	458.17	493.527	1.07717	0.107247	0.696213	1
325	dd_Smed_v6_10323_0_1	366.669	366.992	366.346	0.998241	-0.00253989	0.995721	1
326	dd_Smed_v6_10324_0_1	138.385	149.511	127.259	0.851167	-0.232486	0.352968	1
327	dd_Smed_v6_10325_0_1	142.189	159.955	124.422	0.777854	-0.362428	0.122172	1
328	dd_Smed_v6_10326_0_1	115.53	124.861	106.199	0.850541	-0.233548	0.328752	1
329	dd_Smed_v6_10327_0_1	114.064	115.727	112.401	0.971258	-0.0420731	0.966266	1
330	dd_Smed_v6_10328_0_1	18.9473	22.152	15.7426	0.710663	-0.492762	0.403283	1
331	dd_Smed_v6_10329_0_1	179.784	171.583	187.986	1.0956	0.131715	0.571744	1
332	dd_Smed_v6_1032_0_1	3920.84	4208.7	3632.99	0.86321	-0.212217	0.314678	1
333	dd_Smed_v6_10330_0_1	450.973	430.933	471.013	1.09301	0.128303	0.56591	1
334	dd_Smed_v6_10331_0_1	73.0351	74.3284	71.7418	0.965201	-0.0510982	0.840512	1
335	dd_Smed_v6_10333_0_1	126.997	102.875	151.119	1.46896	0.554791	0.322737	1
336	dd_Smed_v6_10334_0_1	455.056	459.239	450.874	0.981786	-0.0265198	0.953325	1
337	dd_Smed_v6_10335_0_1	370.889	358.086	383.692	1.07151	0.0996405	0.621878	1
338	dd_Smed_v6_10336_0_1	285.26	294.534	275.985	0.937024	-0.0938425	0.780134	1
339	dd_Smed_v6_10337_0_1	320.126	306.062	334.189	1.0919	0.12684	0.476133	1
340	dd_Smed_v6_10338_0_1	308.312	306.4	310.225	1.01249	0.0179006	0.952574	1
341	dd_Smed_v6_10339_0_1	336.68	354.22	319.14	0.900965	-0.150457	0.716452	1
342	dd_Smed_v6_1033_0_1	5308.68	5926.39	4690.97	0.791539	-0.337268	0.0908257	1
343	dd_Smed_v6_10340_0_1	385.724	387.481	383.967	0.990932	-0.0131426	0.968148	1
344	dd_Smed_v6_10341_0_1	161.69	150.268	173.113	1.15203	0.20418	0.377213	1
345	dd_Smed_v6_10342_0_1	289.291	301.032	277.551	0.921997	-0.117165	0.569508	1
346	dd_Smed_v6_10343_0_1	457.997	448.804	467.19	1.04097	0.0579244	0.796997	1
347	dd_Smed_v6_10346_0_1	335.5	320.754	350.245	1.09194	0.126895	0.466393	1
348	dd_Smed_v6_10347_0_1	488.478	478.985	497.97	1.03963	0.0560761	0.764269	1
349	dd_Smed_v6_10348_0_1	397.968	399.188	396.749	0.99389	-0.0088424	0.931827	1
350	dd_Smed_v6_10349_0_1	202.243	197.453	207.032	1.04851	0.0683457	0.926439	1
351	dd_Smed_v6_1034_0_1	3953.86	3688.47	4219.25	1.1439	0.193965	0.369817	1
352	dd_Smed_v6_10350_0_1	93.5944	83.2238	103.965	1.24922	0.321029	0.22249	1
353	dd_Smed_v6_10351_0_1	84.2436	81.719	86.7682	1.06179	0.0864942	0.859287	1
354	dd_Smed_v6_10352_0_1	227.473	237.048	217.897	0.91921	-0.121534	0.62679	1
355	dd_Smed_v6_10354_0_1	320.417	310.02	330.815	1.06708	0.0936638	0.606773	1
356	dd_Smed_v6_10355_0_1	397.133	387.22	407.047	1.0512	0.07204	0.863603	1
357	dd_Smed_v6_10356_0_1	302.377	329.896	274.858	0.833166	-0.263324	0.144682	1
358	dd_Smed_v6_10357_0_1	302.823	303.578	302.067	0.995022	-0.00720031	0.962062	1
359	dd_Smed_v6_10359_0_1	290.561	301.145	279.977	0.929708	-0.105151	0.674851	1
360	dd_Smed_v6_1035_1_1	3189.76	3248.29	3131.24	0.963965	-0.0529478	0.798624	1
361	dd_Smed_v6_10360_0_1	210.198	225.238	195.158	0.866451	-0.206809	0.367508	1
362	dd_Smed_v6_10361_0_1	268.256	244.417	292.094	1.19506	0.257086	0.42111	1
363	dd_Smed_v6_10362_1_1	296.341	285.684	306.997	1.0746	0.103802	0.654832	1
364	dd_Smed_v6_10363_0_1	86.0542	85.2399	86.8685	1.01911	0.0273031	0.909792	1
365	dd_Smed_v6_10364_0_1	248.257	283.504	213.011	0.75135	-0.412442	0.0343433	1
366	dd_Smed_v6_10365_0_1	271.329	261.103	281.556	1.07833	0.108802	0.613539	1
367	dd_Smed_v6_10366_0_1	200.198	211.248	189.149	0.895386	-0.159418	0.551558	1
368	dd_Smed_v6_10368_0_1	68.6608	55.9998	81.3217	1.45218	0.538219	0.485055	1
369	dd_Smed_v6_10369_0_1	738.287	694.367	782.207	1.1265	0.171852	0.398937	1
370	dd_Smed_v6_1036_0_1	2036.88	2073.58	2000.18	0.964601	-0.0519955	0.815263	1
371	dd_Smed_v6_10370_0_1	199.115	186.449	211.781	1.13586	0.183789	0.550589	1
372	dd_Smed_v6_10370_1_1	29.6261	34.7646	24.4876	0.704383	-0.505569	0.142519	1
373	dd_Smed_v6_10371_0_1	124.001	107.841	140.16	1.2997	0.378175	0.256585	1
374	dd_Smed_v6_10372_0_1	178.27	163.206	193.334	1.1846	0.244403	0.349398	1
375	dd_Smed_v6_10373_0_1	502.504	474.791	530.217	1.11674	0.159289	0.443045	1
376	dd_Smed_v6_10374_0_1	513.994	555.831	472.157	0.849461	-0.23538	0.197329	1
377	dd_Smed_v6_10375_0_1	200.171	210.516	189.826	0.90172	-0.149249	0.668322	1
378	dd_Smed_v6_10376_0_1	395.022	361.045	428.999	1.18822	0.248797	0.238466	1
379	dd_Smed_v6_10377_0_1	417.564	436.491	398.637	0.913276	-0.130877	0.569361	1
380	dd_Smed_v6_10378_0_1	278.044	287.942	268.146	0.931251	-0.102758	0.760179	1
381	dd_Smed_v6_10379_0_1	272.994	250.08	295.908	1.18326	0.242762	0.426203	1
382	dd_Smed_v6_1037_0_1	3410.36	3767.75	3052.97	0.810291	-0.303489	0.116776	1
383	dd_Smed_v6_10380_0_1	646.573	677.681	615.464	0.908192	-0.138931	0.5689	1
384	dd_Smed_v6_10381_0_1	21.9526	18.9759	24.9293	1.31374	0.393679	0.69077	1
385	dd_Smed_v6_10382_0_1	340.055	323.365	356.745	1.10323	0.141733	0.686203	1
386	dd_Smed_v6_10386_0_1	160.134	166.351	153.918	0.925259	-0.112071	0.623913	1
387	dd_Smed_v6_10387_0_1	442.844	429.607	456.081	1.06162	0.0862736	0.610486	1
388	dd_Smed_v6_10388_0_1	279.695	259.926	299.465	1.15212	0.204288	0.439797	1
389	dd_Smed_v6_10389_0_1	7.56306	11.5937	3.5324	0.304682	-1.71462	0.0187849	1
390	dd_Smed_v6_1038_0_1	4513.2	4700.44	4325.97	0.920333	-0.119772	0.552851	1
391	dd_Smed_v6_10390_0_1	277.876	275.998	279.754	1.01361	0.0194995	0.866015	1
392	dd_Smed_v6_10391_0_1	289.526	294.723	284.328	0.964732	-0.0518005	0.901509	1
393	dd_Smed_v6_10392_0_1	341.097	332.818	349.377	1.04975	0.0700523	0.744171	1
394	dd_Smed_v6_10393_0_1	262.99	261.62	264.361	1.01048	0.01504	0.871036	1
395	dd_Smed_v6_10394_0_1	395.798	421.183	370.412	0.879456	-0.185317	0.422719	1
396	dd_Smed_v6_10395_0_1	120.065	115.115	125.015	1.086	0.11903	0.778151	1
397	dd_Smed_v6_10396_0_1	320.248	296.812	343.684	1.15792	0.211533	0.490881	1
398	dd_Smed_v6_10397_0_1	181.714	195.298	168.13	0.860888	-0.216103	0.328703	1
399	dd_Smed_v6_10398_0_1	498.048	504.507	491.588	0.974393	-0.0374251	0.944253	1
400	dd_Smed_v6_10399_0_1	179.789	189.301	170.276	0.899501	-0.152803	0.45718	1
401	dd_Smed_v6_1039_0_1	5977.74	6267.87	5687.6	0.907421	-0.140156	0.40746	1
402	dd_Smed_v6_103_0_1	279.724	293.871	265.578	0.903724	-0.146046	0.619983	1
403	dd_Smed_v6_10400_0_1	246.491	244.526	248.457	1.01607	0.0230036	0.984889	1
404	dd_Smed_v6_10402_0_1	456.252	424.541	487.964	1.14939	0.20087	0.333587	1
405	dd_Smed_v6_10403_0_1	205.311	176.324	234.298	1.32879	0.410114	0.313429	1
406	dd_Smed_v6_10404_0_1	334.023	316.762	351.284	1.10898	0.149238	0.558701	1
407	dd_Smed_v6_10405_0_1	172.254	181.442	163.066	0.898725	-0.154049	0.511043	1
408	dd_Smed_v6_10406_0_1	359.063	382.839	335.287	0.87579	-0.191344	0.357431	1
409	dd_Smed_v6_10407_0_1	202.668	193.9	211.436	1.09044	0.124908	0.646806	1
410	dd_Smed_v6_10408_0_1	384.665	374.769	394.561	1.05281	0.0742484	0.756046	1
411	dd_Smed_v6_10409_0_1	465.62	480.174	451.065	0.939378	-0.0902216	0.703759	1
412	dd_Smed_v6_1040_0_1	1521.13	1631.6	1410.65	0.864579	-0.20993	0.286976	1
413	dd_Smed_v6_10410_0_1	65.467	52.5205	78.4136	1.49301	0.578224	0.160863	1
414	dd_Smed_v6_10411_0_1	369.26	378.048	360.472	0.95351	-0.0686801	0.809261	1
415	dd_Smed_v6_10412_0_1	175.943	189.612	162.275	0.855826	-0.224611	0.384088	1
416	dd_Smed_v6_10413_0_1	50.6822	52.1636	49.2009	0.943203	-0.0843603	0.642624	1
417	dd_Smed_v6_10414_0_1	230.19	228.124	232.256	1.01812	0.0259018	0.994065	1
418	dd_Smed_v6_10415_0_1	233.221	222.34	244.103	1.09788	0.13472	0.499794	1
419	dd_Smed_v6_10417_0_1	288.844	280.673	297.015	1.05822	0.0816417	0.682782	1
420	dd_Smed_v6_10418_0_1	71.9719	71.7009	72.2429	1.00756	0.0108652	1	1
421	dd_Smed_v6_10419_0_1	272.98	248.654	297.305	1.19565	0.2578	0.268406	1
422	dd_Smed_v6_1041_0_1	3146.77	3157.72	3135.82	0.993067	-0.0100377	0.950404	1
423	dd_Smed_v6_10420_0_1	332.789	349.857	315.721	0.90243	-0.148113	0.566597	1
424	dd_Smed_v6_10421_0_1	145.492	146.672	144.312	0.983911	-0.0234003	0.775913	1
425	dd_Smed_v6_10422_0_1	261.679	246.802	276.556	1.12056	0.164218	0.550504	1
426	dd_Smed_v6_10424_0_1	270.677	263.813	277.54	1.05203	0.0731815	0.818935	1
427	dd_Smed_v6_10425_0_1	511.423	500.174	522.671	1.04498	0.0634743	0.660418	1
428	dd_Smed_v6_10426_0_1	330.582	339.847	321.317	0.945476	-0.0808878	0.741981	1
429	dd_Smed_v6_10427_0_1	393.683	392.17	395.195	1.00771	0.0110841	0.917668	1
430	dd_Smed_v6_10428_0_1	116.753	105.442	128.063	1.21454	0.280415	0.371508	1
431	dd_Smed_v6_10429_0_1	297.169	246.084	348.254	1.41518	0.500986	0.249865	1
432	dd_Smed_v6_10431_0_1	463.275	450.23	476.319	1.05795	0.0812661	0.641933	1
433	dd_Smed_v6_10434_0_1	351.682	359.026	344.337	0.959085	-0.0602688	0.896831	1
434	dd_Smed_v6_10435_0_1	389.696	341.011	438.381	1.28553	0.362367	0.0632971	1
435	dd_Smed_v6_10436_0_1	340.248	358.831	321.665	0.896423	-0.157749	0.430835	1
436	dd_Smed_v6_10437_0_1	275.361	272.358	278.364	1.02205	0.03147	0.858769	1
437	dd_Smed_v6_10438_0_1	329.114	349.683	308.545	0.882357	-0.180565	0.423806	1
438	dd_Smed_v6_10439_0_1	57.6203	46.7515	68.4891	1.46496	0.550861	0.17061	1
439	dd_Smed_v6_1043_0_1	92.1267	83.9011	100.352	1.19608	0.258314	0.664815	1
440	dd_Smed_v6_10440_0_1	198.245	179.19	217.299	1.21268	0.278197	0.612506	1
441	dd_Smed_v6_10441_0_1	214.737	212.848	216.625	1.01775	0.0253779	0.980497	1
442	dd_Smed_v6_10442_0_1	217.428	234.43	200.426	0.854948	-0.226091	0.308098	1
443	dd_Smed_v6_10443_0_1	213.469	216.47	210.468	0.972274	-0.0405648	0.915456	1
444	dd_Smed_v6_10444_0_1	451.658	431.014	472.302	1.09579	0.131975	0.526259	1
445	dd_Smed_v6_10445_0_1	123.486	128.064	118.908	0.928508	-0.107014	0.723158	1
446	dd_Smed_v6_10446_0_1	236.284	218.618	253.95	1.16161	0.216131	0.592161	1
447	dd_Smed_v6_10447_0_1	250.547	255.689	245.405	0.959779	-0.0592255	0.728467	1
448	dd_Smed_v6_10448_0_1	207.028	212.603	201.453	0.947557	-0.0777157	0.934986	1
449	dd_Smed_v6_10449_0_1	312.186	293.765	330.608	1.12542	0.170459	0.489787	1
450	dd_Smed_v6_1044_0_1	7685.29	7826.82	7543.76	0.963835	-0.0531424	0.727292	1
451	dd_Smed_v6_10450_0_1	100.676	96.661	104.691	1.08307	0.115127	0.993661	1
452	dd_Smed_v6_10453_0_1	347.731	357.763	337.7	0.943919	-0.0832656	0.726061	1
453	dd_Smed_v6_10454_0_1	472.638	468.119	477.156	1.0193	0.0275843	0.868686	1
454	dd_Smed_v6_10456_0_1	98.612	93.7709	103.453	1.10325	0.141765	0.755233	1
455	dd_Smed_v6_10458_0_1	295.104	304.634	285.574	0.937431	-0.0932148	0.720588	1
456	dd_Smed_v6_10459_1_1	397.703	398.281	397.125	0.997097	-0.00419492	0.963664	1
457	dd_Smed_v6_1045_0_1	1312.91	1262.33	1363.49	1.08013	0.111205	0.620691	1
458	dd_Smed_v6_10460_0_1	601.389	596.282	606.497	1.01713	0.0245044	0.86546	1
459	dd_Smed_v6_10462_0_1	204.783	216.146	193.419	0.894853	-0.160278	0.538197	1
460	dd_Smed_v6_10464_0_1	284.325	278.141	290.51	1.04447	0.0627741	0.924269	1
461	dd_Smed_v6_10465_0_2	195.278	198.749	191.808	0.965074	-0.051289	0.89418	1
462	dd_Smed_v6_10466_0_1	132.414	114.174	150.655	1.31952	0.400017	0.149347	1
463	dd_Smed_v6_10467_0_1	184.832	180.593	189.071	1.04694	0.0661846	0.749263	1
464	dd_Smed_v6_10468_0_1	393.548	381.233	405.863	1.06461	0.0903203	0.669092	1
465	dd_Smed_v6_10469_0_1	364.667	333.574	395.759	1.18642	0.246616	0.19896	1
466	dd_Smed_v6_1046_0_1	4011.15	4091.32	3930.99	0.960813	-0.0576725	0.751966	1
467	dd_Smed_v6_10471_0_1	226.945	219.252	234.637	1.07017	0.0978433	0.723172	1
468	dd_Smed_v6_10472_0_1	363.235	362.589	363.881	1.00356	0.0051327	0.945503	1
469	dd_Smed_v6_10473_0_1	407.369	412.661	402.077	0.974351	-0.0374869	0.924717	1
470	dd_Smed_v6_10474_0_1	431.74	451.269	412.212	0.91345	-0.130602	0.619021	1
471	dd_Smed_v6_10476_1_1	9.22133	6.88097	11.5617	1.68024	0.748669	0.230835	1
472	dd_Smed_v6_10477_0_1	32.7415	41.158	24.3249	0.591012	-0.758741	0.0425569	1
473	dd_Smed_v6_10478_0_1	260.453	253.174	267.731	1.0575	0.0806571	0.788137	1
474	dd_Smed_v6_10479_0_1	313.797	302.037	325.557	1.07787	0.108185	0.555318	1
475	dd_Smed_v6_1047_0_1	2769.74	2818.83	2720.65	0.965171	-0.0511428	0.843495	1
476	dd_Smed_v6_10480_0_1	203.498	197.576	209.42	1.05994	0.0839871	0.706897	1
477	dd_Smed_v6_10481_0_1	296.247	298.358	294.136	0.985849	-0.0205608	1	1
478	dd_Smed_v6_10482_0_1	250.14	239.673	260.606	1.08734	0.120801	0.613036	1
479	dd_Smed_v6_10483_0_1	205.648	226.539	184.756	0.81556	-0.294137	0.268629	1
480	dd_Smed_v6_10484_0_1	81.2747	80.0023	82.5471	1.03181	0.0451769	0.968403	1
481	dd_Smed_v6_10485_0_1	308.588	308.292	308.883	1.00192	0.00276522	0.872633	1
482	dd_Smed_v6_10486_0_10	340.43	333.973	346.887	1.03867	0.0547319	0.874351	1
483	dd_Smed_v6_10487_0_2	97.0064	96.539	97.4738	1.00968	0.0139021	0.862512	1
484	dd_Smed_v6_10489_0_1	233.53	230.538	236.522	1.02596	0.0369727	0.825123	1
485	dd_Smed_v6_1048_0_1	2177.05	2326.25	2027.85	0.871726	-0.198054	0.317389	1
486	dd_Smed_v6_10490_0_1	264.099	237.274	290.924	1.22611	0.294086	0.413657	1
487	dd_Smed_v6_10491_0_1	10.6901	7.6811	13.6991	1.78348	0.834696	0.140421	1
488	dd_Smed_v6_10491_1_1	201.975	181.735	222.214	1.22274	0.290113	0.210046	1
489	dd_Smed_v6_10493_0_1	270.97	266.647	275.293	1.03242	0.046037	0.995305	1
490	dd_Smed_v6_10495_0_1	72.0053	70.4254	73.5852	1.04487	0.0633207	0.662223	1
491	dd_Smed_v6_10497_0_1	291.031	293.083	288.98	0.986	-0.0203405	0.919139	1
492	dd_Smed_v6_10498_0_1	409.539	398.951	420.127	1.05308	0.0746153	0.663346	1
493	dd_Smed_v6_10499_0_1	594.082	665.882	522.283	0.784348	-0.350434	0.0792704	1
494	dd_Smed_v6_1049_0_1	1265.93	1388.95	1142.92	0.822872	-0.28126	0.16283	1
495	dd_Smed_v6_104_0_1	7914.36	8363.92	7464.81	0.892501	-0.164075	0.391098	1
496	dd_Smed_v6_10500_0_1	146.344	163.131	129.557	0.794191	-0.332442	0.156521	1
497	dd_Smed_v6_10501_0_1	88.5645	85.3289	91.8001	1.07584	0.105461	0.883019	1
498	dd_Smed_v6_10502_0_1	35.7024	26.8105	44.5943	1.66332	0.734062	0.21172	1
499	dd_Smed_v6_10504_0_1	522.949	546.813	499.086	0.912718	-0.131759	0.551504	1
500	dd_Smed_v6_10506_0_1	218.896	211.166	226.627	1.07322	0.101944	0.620215	1
501	dd_Smed_v6_10507_0_1	86.0123	77.84	94.1846	1.20998	0.274979	0.484825	1
502	dd_Smed_v6_10508_0_1	355.3	376.247	334.352	0.88865	-0.170312	0.426872	1
503	dd_Smed_v6_10509_0_1	449.394	434.813	463.975	1.06707	0.093651	0.623662	1
504	dd_Smed_v6_1050_0_1	2961.4	2995.24	2927.56	0.977404	-0.0329732	0.812232	1
505	dd_Smed_v6_10510_0_1	340.748	331.212	350.284	1.05758	0.080771	0.695072	1
506	dd_Smed_v6_10511_0_1	202.561	207.94	197.183	0.948267	-0.0766354	0.824236	1
507	dd_Smed_v6_10513_0_1	100.71	83.5364	117.884	1.41117	0.496889	0.396454	1
508	dd_Smed_v6_10514_0_1	225.769	236.587	214.952	0.908553	-0.138358	0.556025	1
509	dd_Smed_v6_10515_0_1	178.866	176.085	181.648	1.03159	0.0448752	0.853999	1
510	dd_Smed_v6_10516_0_1	181.88	175.79	187.97	1.06929	0.0966546	0.670833	1
511	dd_Smed_v6_10517_0_1	295.164	314.238	276.091	0.878605	-0.186714	0.411203	1
512	dd_Smed_v6_10518_0_1	454.65	440.138	469.162	1.06594	0.0921287	0.624584	1
513	dd_Smed_v6_10519_0_1	66.639	50.8531	82.4249	1.62084	0.696746	0.167196	1
514	dd_Smed_v6_1051_0_1	906.562	782.666	1030.46	1.3166	0.396818	0.477281	1
515	dd_Smed_v6_10520_0_1	60.9697	55.9998	65.9395	1.1775	0.235721	0.891947	1
516	dd_Smed_v6_10521_0_1	436.045	454.593	417.497	0.918397	-0.12281	0.723979	1
517	dd_Smed_v6_10522_0_1	503.185	512.558	493.811	0.963425	-0.0537562	0.745894	1
518	dd_Smed_v6_10523_0_1	465.758	432.687	498.829	1.15286	0.205221	0.453741	1
519	dd_Smed_v6_10524_0_1	81.3857	78.5997	84.1717	1.07089	0.0988124	0.785702	1
520	dd_Smed_v6_10525_0_1	294.335	298.163	290.506	0.974319	-0.0375342	0.919165	1
521	dd_Smed_v6_10526_0_1	418.592	413.802	423.382	1.02315	0.0330176	0.96075	1
522	dd_Smed_v6_10527_0_1	183.491	196.518	170.463	0.867421	-0.205196	0.392174	1
523	dd_Smed_v6_10529_0_1	305.233	308.662	301.804	0.977781	-0.0324166	0.753342	1
524	dd_Smed_v6_1052_0_1	5469.25	5276.51	5661.99	1.07306	0.101726	0.553722	1
525	dd_Smed_v6_10530_0_1	458.231	415.383	501.079	1.20631	0.270596	0.182881	1
526	dd_Smed_v6_10531_0_1	64.4054	52.7243	76.0864	1.4431	0.529169	0.47278	1
527	dd_Smed_v6_10532_0_1	531.127	529.169	533.086	1.0074	0.0106394	0.962363	1
528	dd_Smed_v6_10533_0_1	48.2481	42.3943	54.1018	1.27616	0.351804	0.671102	1
529	dd_Smed_v6_10534_0_1	140.278	148.109	132.447	0.89425	-0.16125	0.521366	1
530	dd_Smed_v6_10535_0_1	18.4654	21.3243	15.6065	0.731864	-0.450352	0.288283	1
531	dd_Smed_v6_10536_0_1	137.776	125.049	150.503	1.20355	0.267293	0.256807	1
532	dd_Smed_v6_10539_0_1	171.361	141.589	201.132	1.42054	0.506436	0.341146	1
533	dd_Smed_v6_1053_0_1	3698.75	4035.96	3361.54	0.832896	-0.263792	0.169974	1
534	dd_Smed_v6_10540_0_1	445.989	460.728	431.251	0.936021	-0.0953878	0.794548	1
535	dd_Smed_v6_10541_0_1	143.276	129.737	156.816	1.20872	0.273484	0.417896	1
536	dd_Smed_v6_10542_0_1	217.212	234.798	199.626	0.850201	-0.234123	0.277152	1
537	dd_Smed_v6_10543_0_1	248.454	260.482	236.426	0.907646	-0.139799	0.565172	1
538	dd_Smed_v6_10544_0_1	330.776	343.534	318.018	0.925725	-0.111344	0.653705	1
539	dd_Smed_v6_10545_0_1	14.2572	14.0954	14.419	1.02296	0.0327438	0.999225	1
540	dd_Smed_v6_10546_0_1	199.727	202.099	197.355	0.976524	-0.0342726	0.969415	1
541	dd_Smed_v6_10547_0_1	302.686	301.498	303.875	1.00788	0.01133	0.914967	1
542	dd_Smed_v6_10548_0_1	13.9571	14.6586	13.2555	0.904281	-0.145157	0.708556	1
543	dd_Smed_v6_1054_0_1	12346.4	12805.2	11887.6	0.928338	-0.107278	0.699641	1
544	dd_Smed_v6_10551_0_1	225.62	234.314	216.926	0.925793	-0.111238	0.610938	1
545	dd_Smed_v6_10553_0_10	92.4747	100.558	84.3915	0.839231	-0.252859	0.457584	1
546	dd_Smed_v6_10554_0_1	39.233	35.5925	42.8734	1.20456	0.268509	0.763933	1
547	dd_Smed_v6_10555_0_1	348.937	342.051	355.823	1.04027	0.0569519	0.836219	1
548	dd_Smed_v6_10556_0_1	79.8374	65.0643	94.6105	1.45411	0.540135	0.448765	1
549	dd_Smed_v6_10557_0_1	279.628	294.103	265.153	0.901565	-0.149497	0.454703	1
550	dd_Smed_v6_10558_1_1	238.309	210.803	265.814	1.26096	0.33452	0.491122	1
551	dd_Smed_v6_1055_0_1	1536.41	1316.84	1755.98	1.33348	0.415193	0.556381	1
552	dd_Smed_v6_10560_0_1	118.782	116.654	120.91	1.03648	0.0516955	0.729732	1
553	dd_Smed_v6_10561_0_1	204.155	210.5	197.811	0.93972	-0.0896965	0.748852	1
554	dd_Smed_v6_10562_0_1	348.509	342.583	354.434	1.03459	0.0490621	0.753491	1
555	dd_Smed_v6_10564_0_1	279.381	265.59	293.172	1.10385	0.142544	0.525713	1
556	dd_Smed_v6_10565_0_1	281.249	314.964	247.534	0.785912	-0.34756	0.139181	1
557	dd_Smed_v6_10566_0_1	261.186	270.826	251.545	0.928809	-0.106546	0.713399	1
558	dd_Smed_v6_10567_0_1	440.981	437.629	444.333	1.01532	0.0219322	0.880693	1
559	dd_Smed_v6_10568_0_1	70.8938	62.5339	79.2538	1.26737	0.341841	0.487067	1
560	dd_Smed_v6_10569_0_1	165.051	169.382	160.72	0.948862	-0.0757301	0.766972	1
561	dd_Smed_v6_1056_0_1	950.577	835.642	1065.51	1.27508	0.350588	0.410786	1
562	dd_Smed_v6_10570_0_1	209.522	191.699	227.345	1.18595	0.246038	0.222546	1
563	dd_Smed_v6_10571_0_1	105.852	99.0042	112.7	1.13833	0.18692	0.585288	1
564	dd_Smed_v6_10573_0_1	94.0708	82.988	105.154	1.26709	0.341524	0.431447	1
565	dd_Smed_v6_10574_0_1	119.312	103.246	135.378	1.31122	0.390908	0.156942	1
566	dd_Smed_v6_10575_0_1	344.445	335.059	353.83	1.05602	0.0786409	0.783171	1
567	dd_Smed_v6_10576_0_1	128.229	150.886	105.572	0.699684	-0.515225	0.0420618	1
568	dd_Smed_v6_10577_0_1	334.048	336.44	331.655	0.985778	-0.0206648	1	1
569	dd_Smed_v6_10578_0_1	89.0562	117.544	60.5688	0.515288	-0.956548	0.00040453	0.0967219
570	dd_Smed_v6_10579_0_1	134.429	113.618	155.24	1.36633	0.450308	0.432852	1
571	dd_Smed_v6_10581_0_1	214.034	194.217	233.851	1.20407	0.267919	0.600056	1
572	dd_Smed_v6_10582_0_1	303.971	317.459	290.482	0.915022	-0.128122	0.467745	1
573	dd_Smed_v6_10583_0_1	215.016	197.575	232.458	1.17656	0.234571	0.261224	1
574	dd_Smed_v6_10585_0_1	688.607	654.268	722.947	1.10497	0.144009	0.452767	1
575	dd_Smed_v6_10586_0_1	117.067	109.122	125.012	1.14562	0.196132	0.377297	1
576	dd_Smed_v6_10587_0_1	218.926	218.922	218.93	1.00004	5.20992e-05	0.929297	1
577	dd_Smed_v6_10589_0_1	80.5765	70.0702	91.0829	1.29988	0.378381	0.656165	1
578	dd_Smed_v6_1058_0_1	2028.08	2138.59	1917.57	0.89665	-0.157384	0.513579	1
579	dd_Smed_v6_10590_2_1	139.901	131.786	148.015	1.12315	0.167547	0.439311	1
580	dd_Smed_v6_10591_0_1	341.453	350.599	332.307	0.947828	-0.0773029	0.653188	1
581	dd_Smed_v6_10592_0_1	274.129	266.534	281.725	1.05699	0.0799685	0.874829	1
582	dd_Smed_v6_10593_0_1	460.567	439.581	481.554	1.09548	0.131569	0.615078	1
583	dd_Smed_v6_10595_0_1	445.459	522.264	368.653	0.705876	-0.502514	0.0178201	1
584	dd_Smed_v6_10596_0_1	49.2839	38.9041	59.6637	1.53361	0.61693	0.151631	1
585	dd_Smed_v6_10598_0_1	186.395	180.102	192.688	1.06988	0.0974497	0.680693	1
586	dd_Smed_v6_10599_0_1	42.8148	49.3287	36.3009	0.735899	-0.44242	0.389665	1
587	dd_Smed_v6_1059_0_1	1850.03	1754.32	1945.75	1.10912	0.149415	0.555752	1
588	dd_Smed_v6_105_0_1	13092.7	13828.7	12356.7	0.893554	-0.162373	0.413095	1
589	dd_Smed_v6_10601_0_1	317.954	303.357	332.551	1.09624	0.13256	0.641607	1
590	dd_Smed_v6_10602_0_1	478.408	450.816	505.999	1.12241	0.166598	0.617927	1
591	dd_Smed_v6_10603_0_1	13.5512	10.7489	16.3535	1.52141	0.605405	0.374839	1
592	dd_Smed_v6_10604_0_1	137.945	137.562	138.328	1.00557	0.00801799	0.918867	1
593	dd_Smed_v6_10605_0_1	51.6989	52.0082	51.3895	0.988103	-0.0172666	0.907838	1
594	dd_Smed_v6_10607_0_1	87.0521	91.0672	83.037	0.911821	-0.133178	0.415792	1
595	dd_Smed_v6_10608_0_1	137.493	133.491	141.495	1.05996	0.0840086	0.753684	1
596	dd_Smed_v6_10609_0_1	140.882	144.28	137.483	0.95289	-0.0696186	0.733497	1
597	dd_Smed_v6_1060_0_1	5374.82	5697.67	5051.97	0.886672	-0.173527	0.445298	1
598	dd_Smed_v6_10610_0_1	493.006	448.067	537.944	1.20059	0.26374	0.187302	1
599	dd_Smed_v6_10611_0_1	216.333	207.544	225.122	1.08469	0.117289	0.506581	1
600	dd_Smed_v6_10612_0_1	215.909	226.407	205.41	0.907256	-0.140418	0.625039	1
601	dd_Smed_v6_10613_0_1	225.635	221.287	229.983	1.03929	0.0556046	0.77906	1
602	dd_Smed_v6_10614_0_1	293.03	318.228	267.832	0.841635	-0.248734	0.289583	1
603	dd_Smed_v6_10615_0_1	276.668	281.327	272.009	0.966879	-0.0485928	0.875264	1
604	dd_Smed_v6_10616_0_1	21.1716	19.8789	22.4644	1.13006	0.176402	0.780656	1
605	dd_Smed_v6_10617_0_1	169.121	180.206	158.035	0.876972	-0.189397	0.401989	1
606	dd_Smed_v6_10618_0_1	106.825	107.412	106.239	0.989078	-0.0158441	0.974394	1
607	dd_Smed_v6_10619_0_1	231.482	192.891	270.074	1.40014	0.485573	0.181767	1
608	dd_Smed_v6_1061_0_1	4762.73	4447.47	5077.98	1.14177	0.19127	0.597953	1
609	dd_Smed_v6_10620_0_1	243.553	246.612	240.495	0.975197	-0.036234	0.782054	1
610	dd_Smed_v6_10621_0_1	73.9765	73.2641	74.6889	1.01945	0.0277871	0.990402	1
611	dd_Smed_v6_10622_0_1	222.371	202.207	242.535	1.19944	0.262358	0.276158	1
612	dd_Smed_v6_10623_0_1	24.8222	24.8095	24.8348	1.00102	0.00147495	0.945869	1
613	dd_Smed_v6_10624_0_1	470.401	491.205	449.596	0.915292	-0.127696	0.732178	1
614	dd_Smed_v6_10625_0_1	648.355	618.783	677.927	1.09558	0.131695	0.568009	1
615	dd_Smed_v6_10626_0_1	25.3692	27.548	23.1904	0.841817	-0.248421	0.561101	1
616	dd_Smed_v6_10627_0_1	278.176	288.479	267.872	0.928566	-0.106923	0.717627	1
617	dd_Smed_v6_10628_0_1	240.421	231.888	248.954	1.0736	0.102453	0.595899	1
618	dd_Smed_v6_10629_0_1	214.346	211.458	217.233	1.02731	0.0388738	0.801468	1
619	dd_Smed_v6_1062_0_1	6079.2	6793.71	5364.69	0.789655	-0.340706	0.0689951	1
620	dd_Smed_v6_10630_0_2	114.98	125.339	104.622	0.834706	-0.26066	0.289855	1
621	dd_Smed_v6_10631_0_1	253.889	241.997	265.78	1.09827	0.135238	0.574808	1
622	dd_Smed_v6_10632_0_1	463.453	448.14	478.766	1.06834	0.0953711	0.583472	1
623	dd_Smed_v6_10633_0_1	1580.26	1426.23	1734.28	1.216	0.282138	0.124668	1
624	dd_Smed_v6_10635_0_1	404.22	436.977	371.464	0.850077	-0.234335	0.263438	1
625	dd_Smed_v6_10636_0_1	110.057	107.497	112.618	1.04763	0.0671342	0.942127	1
626	dd_Smed_v6_10637_0_1	304.163	290.101	318.225	1.09695	0.133492	0.55086	1
627	dd_Smed_v6_10638_0_1	393.224	405.642	380.806	0.938772	-0.0911537	0.727874	1
628	dd_Smed_v6_10639_0_10	65.3146	67.2027	63.4265	0.943809	-0.0834334	0.936759	1
629	dd_Smed_v6_1063_0_1	4124.05	4442.84	3805.26	0.856493	-0.223487	0.275532	1
630	dd_Smed_v6_10640_0_1	521.87	471.92	571.82	1.21169	0.277019	0.181669	1
631	dd_Smed_v6_10642_0_1	67.1319	62.6279	71.6358	1.14383	0.193874	0.597358	1
632	dd_Smed_v6_10644_0_1	107.963	106.89	109.036	1.02009	0.0286903	0.985668	1
633	dd_Smed_v6_10645_0_1	230.449	221.992	238.906	1.07619	0.105939	0.741033	1
634	dd_Smed_v6_10646_0_1	64.1613	62.5568	65.7657	1.0513	0.0721699	0.785579	1
635	dd_Smed_v6_10647_0_1	346.128	351.23	341.027	0.970951	-0.0425289	0.908379	1
636	dd_Smed_v6_10650_0_1	105.366	108.411	102.321	0.943828	-0.0834036	0.741375	1
637	dd_Smed_v6_10651_0_1	190.156	179.958	200.354	1.11334	0.15489	0.493814	1
638	dd_Smed_v6_10653_0_1	199.631	189.118	210.143	1.11117	0.152081	0.349346	1
639	dd_Smed_v6_10654_1_1	60.4319	50.2604	70.6033	1.40475	0.490313	0.111528	1
640	dd_Smed_v6_10655_0_1	224.398	212.866	235.93	1.10835	0.148415	0.543723	1
641	dd_Smed_v6_10656_0_1	212.251	224.898	199.604	0.887529	-0.172134	0.351933	1
642	dd_Smed_v6_10657_0_1	189.87	194.497	185.243	0.952421	-0.0703288	0.728775	1
643	dd_Smed_v6_10658_0_1	125.319	116.786	133.852	1.14613	0.196765	0.492851	1
644	dd_Smed_v6_10659_0_1	13.853	13.7236	13.9824	1.01886	0.02695	0.954128	1
645	dd_Smed_v6_1065_0_1	4964.53	5306.66	4622.39	0.871054	-0.199166	0.486738	1
646	dd_Smed_v6_10660_0_1	358.04	370.104	345.977	0.934808	-0.0972581	0.723294	1
647	dd_Smed_v6_10661_0_1	187.867	175.71	200.025	1.13838	0.186982	0.619656	1
648	dd_Smed_v6_10662_0_1	176.426	178.726	174.126	0.974263	-0.0376172	0.964707	1
649	dd_Smed_v6_10663_0_1	63.8365	56.3665	71.3064	1.26505	0.339195	0.694143	1
650	dd_Smed_v6_10664_0_1	8.45958	7.47689	9.44227	1.26286	0.336696	0.606955	1
651	dd_Smed_v6_10665_0_1	198.981	199.961	198.001	0.990202	-0.0142052	0.999806	1
652	dd_Smed_v6_10666_0_1	381.213	347.985	414.441	1.19098	0.252144	0.273188	1
653	dd_Smed_v6_10667_0_1	485.028	488.38	481.677	0.986275	-0.0199377	0.965872	1
654	dd_Smed_v6_10669_0_1	324.047	331.128	316.965	0.957226	-0.0630686	0.919565	1
655	dd_Smed_v6_1066_0_1	1701.44	1850.96	1551.93	0.838448	-0.254207	0.205024	1
656	dd_Smed_v6_10670_0_1	513.63	511.005	516.255	1.01027	0.014747	0.987607	1
657	dd_Smed_v6_10671_0_1	186.08	166.921	205.239	1.22955	0.298133	0.229361	1
658	dd_Smed_v6_10672_0_1	293.243	303.384	283.102	0.933147	-0.099823	0.633073	1
659	dd_Smed_v6_10673_0_1	234.941	212.129	257.754	1.21508	0.281053	0.16505	1
660	dd_Smed_v6_10674_0_1	126.948	126.556	127.34	1.00619	0.00890484	0.898474	1
661	dd_Smed_v6_10675_0_1	270.768	255.633	285.903	1.11842	0.161456	0.458532	1
662	dd_Smed_v6_10676_0_1	291.916	330.31	253.523	0.76753	-0.381706	0.128008	1
663	dd_Smed_v6_10677_0_1	428.537	368.496	488.578	1.32587	0.406939	0.336902	1
664	dd_Smed_v6_10678_0_1	45.4222	46.7446	44.0999	0.943422	-0.0840242	0.688514	1
665	dd_Smed_v6_1067_0_1	683.24	602.003	764.478	1.26989	0.344703	0.503437	1
666	dd_Smed_v6_10681_0_1	402.601	409.411	395.79	0.966732	-0.0488127	0.960522	1
667	dd_Smed_v6_10682_0_1	228.265	252.527	204.004	0.807851	-0.30784	0.299573	1
668	dd_Smed_v6_10683_0_1	369.094	363.145	375.043	1.03276	0.0465085	0.760619	1
669	dd_Smed_v6_10684_0_1	297.542	300.671	294.413	0.979186	-0.0303457	0.826065	1
670	dd_Smed_v6_10685_0_1	186.062	142.423	229.7	1.6128	0.689564	0.123277	1
671	dd_Smed_v6_10687_0_1	214.396	218.947	209.845	0.958429	-0.061257	0.752749	1
672	dd_Smed_v6_10688_0_1	400.359	393.088	407.63	1.03699	0.0524061	0.867452	1
673	dd_Smed_v6_10689_0_1	166.314	167.443	165.186	0.986519	-0.0195808	0.979615	1
674	dd_Smed_v6_1068_0_1	3316.3	3499.46	3133.14	0.895321	-0.159524	0.366477	1
675	dd_Smed_v6_10690_0_1	45.089	41.3377	48.8402	1.18149	0.24061	0.86289	1
676	dd_Smed_v6_10691_0_1	400.268	399.475	401.06	1.00397	0.00571523	0.981419	1
677	dd_Smed_v6_10693_0_1	296.812	303.722	289.902	0.954499	-0.0671843	0.862524	1
678	dd_Smed_v6_10696_0_1	926.851	825.002	1028.7	1.24691	0.318355	0.318772	1
679	dd_Smed_v6_10698_0_1	189.226	180.014	198.438	1.10235	0.140583	0.702043	1
680	dd_Smed_v6_10699_0_1	258.16	232.708	283.612	1.21875	0.285398	0.662782	1
681	dd_Smed_v6_1069_0_1	3415.82	3649.05	3182.59	0.87217	-0.197319	0.487313	1
682	dd_Smed_v6_106_0_1	9699.83	10302.2	9097.45	0.883057	-0.179421	0.363746	1
683	dd_Smed_v6_10700_0_1	442.325	442.361	442.289	0.999838	-0.000233393	0.967131	1
684	dd_Smed_v6_10703_0_1	178.415	167.106	189.724	1.13535	0.183142	0.40984	1
685	dd_Smed_v6_10704_0_1	352.864	347.459	358.268	1.03111	0.0441964	0.796107	1
686	dd_Smed_v6_10707_0_1	265.848	272.544	259.152	0.950861	-0.0726929	0.710092	1
687	dd_Smed_v6_10708_0_1	294.363	266.457	322.269	1.20946	0.274365	0.544563	1
688	dd_Smed_v6_10709_0_1	126.876	128.846	124.906	0.969422	-0.0448034	0.740658	1
689	dd_Smed_v6_1070_0_1	14221.5	14489.1	13954	0.963066	-0.0542932	0.86818	1
690	dd_Smed_v6_10710_0_1	173.029	144.171	201.887	1.40033	0.485763	0.307435	1
691	dd_Smed_v6_10711_0_1	126.438	109.441	143.435	1.31062	0.390245	0.483306	1
692	dd_Smed_v6_10712_0_1	154.351	155.155	153.548	0.989643	-0.0150202	0.917713	1
693	dd_Smed_v6_10713_0_1	14.6023	14.7033	14.5012	0.986258	-0.0199632	0.946784	1
694	dd_Smed_v6_10714_0_1	207.001	191.658	222.344	1.16011	0.214258	0.339095	1
695	dd_Smed_v6_10715_0_1	75.8105	76.4752	75.1459	0.982618	-0.025297	0.995026	1
696	dd_Smed_v6_10716_0_1	166.77	168.046	165.494	0.984815	-0.022076	0.966572	1
697	dd_Smed_v6_10717_0_1	374.587	344.273	404.901	1.1761	0.234016	0.298252	1
698	dd_Smed_v6_10718_0_1	35.3942	35.8437	34.9446	0.974916	-0.0366504	0.933607	1
699	dd_Smed_v6_10719_0_1	618.956	557.571	680.34	1.22019	0.2871	0.227047	1
700	dd_Smed_v6_1071_0_1	28.4664	22.6795	34.2533	1.51032	0.594854	0.0822548	1
701	dd_Smed_v6_10722_0_1	230.736	236.662	224.81	0.94992	-0.0741217	0.767061	1
702	dd_Smed_v6_10724_0_1	432.303	460.803	403.802	0.876301	-0.190502	0.308898	1
703	dd_Smed_v6_10725_0_1	108.246	83.3144	133.179	1.59851	0.676724	0.323021	1
704	dd_Smed_v6_10727_0_1	188.066	185.969	190.163	1.02255	0.0321753	0.800475	1
705	dd_Smed_v6_10729_0_1	96.6369	111.645	81.6291	0.73115	-0.451761	0.0686142	1
706	dd_Smed_v6_1072_0_1	904.22	833.43	975.011	1.16988	0.226358	0.606259	1
707	dd_Smed_v6_10730_0_1	433.821	434.117	433.525	0.998635	-0.00197012	0.914866	1
708	dd_Smed_v6_10731_0_1	305.839	298.957	312.722	1.04604	0.0649441	0.854395	1
293	dd_Smed_v6_1028_0_1	54.0108	91.7348	16.2867	0.177541	-2.49377	9.54454e-07	0.000483263
710	dd_Smed_v6_10733_0_1	184.183	178.184	190.182	1.06733	0.0940091	0.776367	1
711	dd_Smed_v6_10734_0_1	525.507	550.547	500.467	0.909036	-0.13759	0.560527	1
712	dd_Smed_v6_10735_0_1	40.5925	41.3426	39.8425	0.963714	-0.0533235	0.933155	1
713	dd_Smed_v6_10737_0_1	480.549	480.822	480.277	0.998865	-0.00163782	0.976995	1
714	dd_Smed_v6_10738_0_1	137.762	137.224	138.3	1.00784	0.0112696	0.953082	1
715	dd_Smed_v6_10739_0_1	36.0076	31.0001	41.015	1.32306	0.403878	0.709379	1
716	dd_Smed_v6_1073_0_1	3820.85	3886.11	3755.59	0.966414	-0.0492867	0.936932	1
717	dd_Smed_v6_10741_0_1	202.477	210.898	194.056	0.92014	-0.120074	0.667387	1
718	dd_Smed_v6_10742_0_1	444.04	435.515	452.566	1.03915	0.0554076	0.821513	1
719	dd_Smed_v6_10744_0_1	526.585	556.959	496.211	0.890929	-0.166618	0.424251	1
720	dd_Smed_v6_10745_0_1	204.511	189.517	219.505	1.15823	0.211923	0.40486	1
721	dd_Smed_v6_10748_0_1	611.878	578.055	645.701	1.11702	0.15966	0.335748	1
722	dd_Smed_v6_10749_0_1	36.0583	31.2	40.9166	1.31143	0.391141	0.338735	1
723	dd_Smed_v6_1074_0_1	1950.18	1890.58	2009.78	1.06305	0.0882063	0.693426	1
724	dd_Smed_v6_10750_0_1	53.5539	51.5156	55.5921	1.07913	0.109871	0.719772	1
725	dd_Smed_v6_10750_1_1	166.487	168.223	164.751	0.979363	-0.0300842	0.849644	1
726	dd_Smed_v6_10751_0_1	408.756	418.739	398.772	0.952317	-0.0704862	0.860757	1
727	dd_Smed_v6_10752_0_1	316.776	312.162	321.391	1.02957	0.0420376	0.806462	1
728	dd_Smed_v6_10753_0_1	54.7213	41.8218	67.6208	1.61688	0.69321	0.442116	1
729	dd_Smed_v6_10754_0_1	246.604	248.865	244.343	0.981827	-0.0264594	0.912582	1
730	dd_Smed_v6_10755_0_1	121.389	120.532	122.246	1.01422	0.020372	0.930718	1
731	dd_Smed_v6_10757_0_1	169.283	178.392	160.174	0.897877	-0.155411	0.396423	1
732	dd_Smed_v6_10758_0_1	223.818	245.848	201.788	0.820784	-0.284926	0.153262	1
733	dd_Smed_v6_10759_0_1	187.551	181.705	193.397	1.06435	0.0899667	0.802168	1
734	dd_Smed_v6_1075_0_1	2200.32	2306.95	2093.69	0.907559	-0.139936	0.509681	1
735	dd_Smed_v6_10760_0_1	328.847	329.604	328.091	0.995408	-0.0066404	0.922077	1
736	dd_Smed_v6_10761_0_1	74.4052	77.4957	71.3147	0.920241	-0.119917	0.70828	1
737	dd_Smed_v6_10762_0_1	347.924	324.434	371.414	1.14481	0.195103	0.382179	1
738	dd_Smed_v6_10763_0_1	39.3878	41.4711	37.3044	0.899526	-0.152763	0.746384	1
739	dd_Smed_v6_10764_0_1	347.569	353.096	342.042	0.968694	-0.0458869	0.862115	1
740	dd_Smed_v6_10765_0_1	240.913	254.444	227.381	0.89364	-0.162235	0.541363	1
741	dd_Smed_v6_10766_0_1	335.598	351.003	320.192	0.912221	-0.132544	0.704566	1
742	dd_Smed_v6_10768_0_1	178.856	183.196	174.517	0.952625	-0.0700199	0.774009	1
743	dd_Smed_v6_10769_0_1	201.03	211.238	190.821	0.903346	-0.14665	0.519282	1
744	dd_Smed_v6_1076_0_1	2774.37	2775.57	2773.16	0.999129	-0.00125696	0.944232	1
745	dd_Smed_v6_10770_0_1	100.172	109.723	90.6211	0.825907	-0.27595	0.315161	1
746	dd_Smed_v6_10771_0_1	213.22	192.574	233.866	1.21442	0.280269	0.25589	1
747	dd_Smed_v6_10774_0_1	188.787	192.105	185.47	0.965462	-0.0507088	0.87749	1
748	dd_Smed_v6_10776_0_1	310.716	327.046	294.387	0.900137	-0.151783	0.474348	1
749	dd_Smed_v6_10777_0_1	387.982	371.277	404.687	1.08999	0.124309	0.80696	1
750	dd_Smed_v6_10778_0_1	229.548	212.176	246.92	1.16375	0.218777	0.264101	1
751	dd_Smed_v6_1077_0_1	2178.31	2139.63	2216.98	1.03615	0.0512344	0.815933	1
752	dd_Smed_v6_10780_0_1	181.469	175.051	187.888	1.07333	0.1021	0.759916	1
753	dd_Smed_v6_10781_0_1	183.373	188.149	178.596	0.949229	-0.0751714	0.780339	1
754	dd_Smed_v6_10782_0_1	137.305	120.283	154.326	1.28303	0.359553	0.368006	1
755	dd_Smed_v6_10783_0_1	58.2193	59.594	56.8445	0.953862	-0.0681478	0.785676	1
756	dd_Smed_v6_10784_0_1	172.169	162.796	181.541	1.11514	0.15723	0.596171	1
757	dd_Smed_v6_10785_0_1	374.077	373.506	374.649	1.00306	0.00441155	0.924688	1
758	dd_Smed_v6_10786_0_1	366.52	378.786	354.255	0.935237	-0.0965965	0.618358	1
759	dd_Smed_v6_10787_0_1	351.108	340.01	362.205	1.06528	0.0912294	0.681386	1
760	dd_Smed_v6_10789_0_1	180.542	180.796	180.289	0.997195	-0.00405225	0.847221	1
761	dd_Smed_v6_1078_1_1	1826.97	1905.13	1748.81	0.917947	-0.123517	0.547452	1
762	dd_Smed_v6_10790_0_1	111.346	104.744	117.948	1.12606	0.171286	0.541404	1
763	dd_Smed_v6_10791_0_1	486.838	393.783	579.893	1.47262	0.558385	0.00381451	0.547223
764	dd_Smed_v6_10792_0_1	226.772	217.97	235.574	1.08077	0.112053	0.929503	1
765	dd_Smed_v6_10793_0_1	51.081	52.9015	49.2606	0.931176	-0.102874	0.812701	1
766	dd_Smed_v6_10794_0_1	330.831	319.583	342.079	1.07039	0.0981398	0.576348	1
767	dd_Smed_v6_10796_0_1	227.584	216.003	239.166	1.10724	0.146966	0.59415	1
768	dd_Smed_v6_10797_0_1	137.729	140.952	134.507	0.954275	-0.0675224	0.654422	1
769	dd_Smed_v6_10798_0_1	178.784	181.827	175.74	0.966522	-0.0491262	0.870701	1
770	dd_Smed_v6_1079_0_1	2049.26	2090.18	2008.34	0.960846	-0.0576224	0.676154	1
771	dd_Smed_v6_107_0_1	10327.3	11422.6	9231.99	0.808218	-0.307183	0.093249	1
772	dd_Smed_v6_10801_0_1	102.97	102.631	103.308	1.0066	0.00948845	1	1
773	dd_Smed_v6_10802_0_1	432.753	432.421	433.085	1.00154	0.00221347	0.971836	1
774	dd_Smed_v6_10803_0_1	121.171	122.054	120.288	0.985528	-0.0210308	0.986945	1
775	dd_Smed_v6_10804_0_1	603.008	614.473	591.543	0.962684	-0.0548661	0.769105	1
776	dd_Smed_v6_10805_0_1	77.3257	80.5005	74.151	0.921124	-0.118532	0.788395	1
777	dd_Smed_v6_10806_0_1	279.017	292.66	265.373	0.906763	-0.141203	0.592855	1
778	dd_Smed_v6_10808_0_1	540.509	512.937	568.081	1.10751	0.147314	0.453381	1
779	dd_Smed_v6_10811_0_1	220.078	208.335	231.821	1.11273	0.154107	0.431741	1
780	dd_Smed_v6_10812_0_1	152.163	139.511	164.816	1.18138	0.240472	0.38928	1
781	dd_Smed_v6_10813_0_1	347.407	371.732	323.082	0.869125	-0.202364	0.29163	1
782	dd_Smed_v6_10815_0_1	199.766	204.545	194.988	0.953276	-0.0690345	0.823137	1
783	dd_Smed_v6_10816_0_1	220.654	228.21	213.098	0.933781	-0.0988442	0.647192	1
784	dd_Smed_v6_10817_0_1	123.697	105.478	141.917	1.34547	0.42811	0.495186	1
785	dd_Smed_v6_10819_0_1	27.3244	27.5803	27.0686	0.981445	-0.0270213	1	1
786	dd_Smed_v6_1081_0_1	3870.42	3820.28	3920.56	1.02625	0.037382	0.831538	1
787	dd_Smed_v6_10820_0_1	383.286	360.422	406.149	1.12687	0.172322	0.459148	1
788	dd_Smed_v6_10822_0_1	320.913	357.552	284.275	0.795059	-0.330866	0.15646	1
789	dd_Smed_v6_10823_0_1	414.695	413.887	415.504	1.00391	0.00562443	0.964079	1
790	dd_Smed_v6_10824_0_1	340.684	329.644	351.725	1.06698	0.0935381	0.645224	1
791	dd_Smed_v6_10825_0_1	170.967	188.04	153.895	0.818413	-0.289099	0.243253	1
792	dd_Smed_v6_10826_0_1	341.855	326.982	356.727	1.09097	0.125606	0.564467	1
793	dd_Smed_v6_10827_0_1	225.854	206.492	245.217	1.18754	0.24797	0.353118	1
794	dd_Smed_v6_10828_0_1	317.385	298.696	336.074	1.12514	0.170099	0.400085	1
795	dd_Smed_v6_10829_0_1	187.726	203.921	171.532	0.841166	-0.249537	0.24906	1
796	dd_Smed_v6_10829_1_1	96.9703	100.242	93.6986	0.934724	-0.0973873	0.753346	1
797	dd_Smed_v6_1082_0_1	99.4446	106.173	92.7162	0.873255	-0.195526	0.437594	1
798	dd_Smed_v6_10830_0_2	45.7462	46.7598	44.7326	0.956645	-0.0639447	0.992675	1
799	dd_Smed_v6_10831_0_1	293.101	283.355	302.847	1.06879	0.0959786	0.688381	1
800	dd_Smed_v6_10832_0_1	229.049	241.68	216.418	0.895474	-0.159276	0.518193	1
801	dd_Smed_v6_10833_0_1	454.491	458.977	450.005	0.980452	-0.0284808	0.973425	1
802	dd_Smed_v6_10834_0_1	369.128	382.046	356.21	0.932375	-0.101017	0.661439	1
803	dd_Smed_v6_10835_0_1	62.3941	59.5855	65.2028	1.09427	0.129972	0.887467	1
804	dd_Smed_v6_10837_0_1	331.245	330.158	332.332	1.00659	0.00947073	1	1
805	dd_Smed_v6_1083_0_1	2620.65	2718.62	2522.69	0.927931	-0.10791	0.630613	1
806	dd_Smed_v6_10841_0_1	379.868	322.139	437.597	1.35841	0.441916	0.0765739	1
807	dd_Smed_v6_10842_0_1	101.343	104.976	97.7102	0.930786	-0.103478	0.850777	1
808	dd_Smed_v6_10845_0_2	40.0288	30.7342	49.3233	1.60483	0.682425	0.0389835	1
809	dd_Smed_v6_10846_0_1	208.616	212.273	204.958	0.96554	-0.0505921	0.972783	1
810	dd_Smed_v6_10848_0_1	310.288	303.471	317.104	1.04492	0.0633969	0.692659	1
811	dd_Smed_v6_10849_0_1	515.652	501.282	530.022	1.05733	0.0804306	0.661274	1
812	dd_Smed_v6_10850_0_1	329.752	333.556	325.948	0.977192	-0.0332864	0.981848	1
813	dd_Smed_v6_10851_0_1	265.536	261.443	269.628	1.0313	0.0444704	0.773484	1
814	dd_Smed_v6_10852_0_1	182.652	180.037	185.267	1.02905	0.0413182	0.834556	1
815	dd_Smed_v6_10853_0_1	30.828	28.7528	32.9032	1.14435	0.194527	0.725706	1
816	dd_Smed_v6_10854_0_1	429.635	401.96	457.31	1.1377	0.18612	0.393746	1
817	dd_Smed_v6_10855_0_1	274.371	293.112	255.63	0.872124	-0.197395	0.321016	1
818	dd_Smed_v6_10857_0_1	134.319	131.795	136.843	1.0383	0.0542232	0.847263	1
819	dd_Smed_v6_10858_0_1	262.02	261.176	262.864	1.00646	0.00929449	1	1
820	dd_Smed_v6_10859_0_1	183.382	178.185	188.578	1.05832	0.0817807	0.695268	1
821	dd_Smed_v6_1085_0_1	51.0639	47.322	54.8059	1.15815	0.211819	0.926156	1
822	dd_Smed_v6_10861_0_1	236.395	234.21	238.579	1.01865	0.0266648	0.93239	1
823	dd_Smed_v6_10863_0_1	272.432	280.91	263.954	0.939638	-0.0898231	0.683008	1
824	dd_Smed_v6_10864_0_1	223.017	232.625	213.409	0.917395	-0.124385	0.596355	1
825	dd_Smed_v6_10866_0_1	469.057	518.408	419.706	0.809606	-0.304709	0.131643	1
826	dd_Smed_v6_10868_0_1	130.361	139.485	121.238	0.869182	-0.20227	0.378447	1
827	dd_Smed_v6_10869_0_1	227.195	216.833	237.556	1.09557	0.131682	0.617209	1
828	dd_Smed_v6_1086_0_1	3059.97	3246.89	2873.06	0.884864	-0.176472	0.445132	1
829	dd_Smed_v6_10870_0_1	421.418	413.937	428.899	1.03615	0.0512287	0.937462	1
830	dd_Smed_v6_10872_0_1	106.887	104.405	109.369	1.04755	0.0670197	0.837559	1
831	dd_Smed_v6_10873_0_1	377.299	404.337	350.261	0.866261	-0.207127	0.375937	1
832	dd_Smed_v6_10874_0_1	15.828	16.1091	15.5468	0.965091	-0.0512638	0.870142	1
833	dd_Smed_v6_10875_0_1	42.4257	38.5569	46.2946	1.20068	0.263855	0.468454	1
834	dd_Smed_v6_10876_0_1	143.073	116.052	170.095	1.46568	0.551575	0.218738	1
835	dd_Smed_v6_10877_0_1	37.1115	47.224	26.9991	0.571724	-0.806609	0.0283971	1
836	dd_Smed_v6_10878_0_1	55.7708	61.6234	49.9181	0.810051	-0.303915	0.45442	1
837	dd_Smed_v6_10879_0_1	158.047	160.238	155.856	0.972654	-0.0400019	0.910157	1
838	dd_Smed_v6_1087_0_1	3786.52	3896.09	3676.95	0.943754	-0.0835167	0.665769	1
839	dd_Smed_v6_10880_0_1	48.8433	51.6134	46.0731	0.892657	-0.163822	0.788867	1
840	dd_Smed_v6_10881_0_1	209.636	202.387	216.884	1.07163	0.0998036	0.736264	1
841	dd_Smed_v6_10882_0_1	316.702	323.375	310.029	0.958727	-0.0608073	0.865894	1
842	dd_Smed_v6_10883_0_1	306.872	279.345	334.399	1.19708	0.259523	0.584213	1
843	dd_Smed_v6_10885_0_1	176.224	182.051	170.397	0.935987	-0.0954397	0.706161	1
844	dd_Smed_v6_10887_0_2	10.5183	15.0082	6.02838	0.401671	-1.31591	0.0141246	1
845	dd_Smed_v6_10888_0_1	401.203	414.555	387.851	0.935583	-0.096062	0.710279	1
846	dd_Smed_v6_10889_0_1	429.941	421.119	438.763	1.0419	0.0592134	0.741625	1
847	dd_Smed_v6_1088_0_1	15078.1	15401.1	14755.1	0.958057	-0.0618171	0.71696	1
848	dd_Smed_v6_10890_0_1	55.0234	62.9902	47.0565	0.747045	-0.420733	0.118236	1
849	dd_Smed_v6_10891_0_1	244.877	247.322	242.432	0.980225	-0.0288154	1	1
850	dd_Smed_v6_10892_0_1	426.584	408.174	444.995	1.09021	0.124606	0.511774	1
851	dd_Smed_v6_10893_0_1	469.138	479.867	458.408	0.955282	-0.0660013	0.824077	1
852	dd_Smed_v6_10894_0_1	311.099	269.639	352.559	1.30752	0.386833	0.410646	1
853	dd_Smed_v6_10897_0_1	58.6386	56.4594	60.8177	1.07719	0.107278	0.722679	1
854	dd_Smed_v6_10898_0_1	213.101	222.146	204.056	0.91857	-0.122539	0.631482	1
855	dd_Smed_v6_10899_0_1	297.931	285.038	310.824	1.09047	0.124948	0.516016	1
856	dd_Smed_v6_1089_0_1	4559.87	4493.65	4626.09	1.02947	0.0419053	0.878022	1
857	dd_Smed_v6_108_0_1	35253.6	37150.5	33356.7	0.897878	-0.155408	0.449441	1
858	dd_Smed_v6_10900_0_1	319.969	316.538	323.4	1.02168	0.0309438	0.892541	1
859	dd_Smed_v6_10901_0_1	109.112	111.24	106.983	0.961727	-0.0563006	0.855846	1
860	dd_Smed_v6_10902_0_1	225.621	212.974	238.267	1.11876	0.161903	0.441781	1
861	dd_Smed_v6_10903_0_1	144.966	125.669	164.264	1.30712	0.386389	0.11399	1
862	dd_Smed_v6_10905_0_1	244.782	209.078	280.487	1.34154	0.423893	0.440548	1
863	dd_Smed_v6_10906_0_1	47.0135	38.6956	55.3313	1.42991	0.515929	0.10849	1
864	dd_Smed_v6_10908_0_1	43.3421	39.6454	47.0388	1.18649	0.246697	0.483331	1
865	dd_Smed_v6_1090_0_1	672.903	656.207	689.598	1.05088	0.0716031	0.979826	1
866	dd_Smed_v6_10910_0_1	344.767	377.591	311.943	0.826139	-0.275544	0.109114	1
867	dd_Smed_v6_10911_0_1	253.738	259.396	248.08	0.956374	-0.0643537	0.874775	1
868	dd_Smed_v6_10912_0_1	141.883	126.316	157.45	1.24648	0.317859	0.412827	1
869	dd_Smed_v6_10914_0_1	245.198	216.881	273.515	1.26113	0.33472	0.143278	1
870	dd_Smed_v6_10915_0_1	191.367	195.259	187.476	0.960138	-0.0586865	0.722379	1
871	dd_Smed_v6_10916_0_1	211.662	187.468	235.857	1.25812	0.331266	0.641442	1
872	dd_Smed_v6_10917_0_1	364.433	407.325	321.542	0.789397	-0.341176	0.101051	1
873	dd_Smed_v6_10919_0_1	86.5283	90.063	82.9936	0.921506	-0.117934	0.671017	1
874	dd_Smed_v6_10921_0_1	380.144	399.167	361.121	0.904686	-0.144511	0.511275	1
875	dd_Smed_v6_10923_0_1	91.167	104.828	77.5063	0.739368	-0.435635	0.0741223	1
876	dd_Smed_v6_10924_0_1	548.994	541.976	556.012	1.0259	0.0368863	0.82805	1
877	dd_Smed_v6_10925_0_1	61.1165	54.2329	68.0002	1.25385	0.326369	0.229491	1
878	dd_Smed_v6_10926_0_1	337.818	346.279	329.358	0.951135	-0.0722783	0.806852	1
879	dd_Smed_v6_10927_0_1	315.216	334.659	295.772	0.883802	-0.178205	0.407063	1
880	dd_Smed_v6_10928_0_1	19.976	24.4747	15.4773	0.632379	-0.661139	0.162326	1
881	dd_Smed_v6_10929_0_2	267.151	274.628	259.673	0.945545	-0.080782	0.696602	1
882	dd_Smed_v6_1092_0_1	2677.45	2795.04	2559.87	0.915862	-0.126798	0.531434	1
883	dd_Smed_v6_10930_0_1	113.348	111.741	114.955	1.02876	0.0409124	0.912355	1
884	dd_Smed_v6_10933_0_1	140.661	134.822	146.499	1.08661	0.119837	0.654212	1
885	dd_Smed_v6_10934_0_1	249.852	241.515	258.189	1.06904	0.0963149	0.683666	1
886	dd_Smed_v6_10935_0_1	421.044	430.562	411.526	0.955788	-0.0652372	0.670751	1
887	dd_Smed_v6_10936_0_1	95.0109	91.7218	98.3001	1.07172	0.0999287	0.755985	1
888	dd_Smed_v6_10939_0_1	222.527	231.424	213.63	0.923112	-0.115422	0.707537	1
889	dd_Smed_v6_1093_0_1	410.385	418.926	401.843	0.95922	-0.0600666	0.805422	1
890	dd_Smed_v6_10941_0_1	230.441	221.864	239.017	1.07732	0.10744	0.68286	1
891	dd_Smed_v6_10942_0_1	101.525	108.243	94.8072	0.87587	-0.191211	0.387556	1
892	dd_Smed_v6_10943_0_1	231.228	208.215	254.24	1.22105	0.288119	0.274279	1
893	dd_Smed_v6_10945_0_1	289.474	292.85	286.099	0.976947	-0.0336478	0.996897	1
894	dd_Smed_v6_10946_0_1	457.272	461.212	453.332	0.982915	-0.0248615	0.997554	1
895	dd_Smed_v6_10947_0_1	248.375	267.555	229.196	0.85663	-0.223255	0.318153	1
896	dd_Smed_v6_10948_0_1	101.61	94.7088	108.512	1.14574	0.196277	0.438903	1
897	dd_Smed_v6_10949_0_1	231.496	229.229	233.763	1.01978	0.0282588	0.991505	1
898	dd_Smed_v6_1094_0_1	2361.01	2506.42	2215.6	0.883972	-0.177928	0.529137	1
899	dd_Smed_v6_10951_0_1	290.76	285.495	296.026	1.03689	0.0522585	0.865204	1
900	dd_Smed_v6_10952_0_1	93.9611	80.2235	107.699	1.34248	0.424903	0.381303	1
901	dd_Smed_v6_10953_0_1	64.3186	65.3251	63.3121	0.969185	-0.0451556	0.975557	1
902	dd_Smed_v6_10954_0_1	157.856	139.854	175.859	1.25745	0.330505	0.309127	1
903	dd_Smed_v6_10955_0_1	290.867	295.897	285.838	0.966008	-0.0498933	0.77282	1
904	dd_Smed_v6_10956_0_1	42.5794	38.0728	47.086	1.23674	0.306539	0.363218	1
905	dd_Smed_v6_10957_0_1	47.9202	42.4768	53.3637	1.2563	0.329185	0.338038	1
906	dd_Smed_v6_10958_0_1	283.094	293.468	272.72	0.929299	-0.105785	0.660563	1
907	dd_Smed_v6_10959_0_1	362.851	409.906	315.797	0.770413	-0.376296	0.0721356	1
908	dd_Smed_v6_1095_0_1	3709.68	3746.4	3672.97	0.980399	-0.0285591	0.914289	1
909	dd_Smed_v6_10962_0_1	530.369	529.561	531.178	1.00305	0.00439806	0.902624	1
910	dd_Smed_v6_10966_0_1	381.371	382.8	379.941	0.992531	-0.0108157	0.962127	1
911	dd_Smed_v6_10967_0_1	255.276	262.381	248.171	0.945845	-0.0803242	0.766208	1
912	dd_Smed_v6_10968_0_1	27.6118	23.4818	31.7419	1.35176	0.434841	0.252521	1
913	dd_Smed_v6_10969_0_1	405.54	394.661	416.419	1.05513	0.0774224	0.698748	1
914	dd_Smed_v6_1096_0_1	3634.62	3456.57	3812.67	1.10302	0.141462	0.522034	1
915	dd_Smed_v6_10970_0_1	205.272	177.194	233.349	1.31692	0.397163	0.473492	1
916	dd_Smed_v6_10972_0_1	270.395	270.493	270.296	0.999271	-0.00105252	1	1
917	dd_Smed_v6_10973_0_1	56.4339	69.6024	43.2655	0.621609	-0.68592	0.0219909	1
918	dd_Smed_v6_10974_0_1	287.669	305.503	269.835	0.883248	-0.179109	0.45073	1
919	dd_Smed_v6_10976_0_1	175.77	165.906	185.633	1.11891	0.162094	0.620719	1
920	dd_Smed_v6_10977_0_1	319.769	314.636	324.901	1.03262	0.046314	0.848902	1
921	dd_Smed_v6_10979_0_1	322.592	335.848	309.335	0.921054	-0.118642	0.611866	1
922	dd_Smed_v6_1097_0_1	829.052	904.019	754.084	0.834146	-0.261627	0.25535	1
923	dd_Smed_v6_10980_0_1	288.706	279.531	297.881	1.06565	0.0917296	0.693992	1
924	dd_Smed_v6_10981_0_1	243.492	260.311	226.674	0.870784	-0.199613	0.295345	1
925	dd_Smed_v6_10983_0_1	359.778	365.173	354.383	0.970451	-0.0432726	0.913178	1
926	dd_Smed_v6_10984_0_1	283.121	268.905	297.338	1.10573	0.145005	0.532616	1
927	dd_Smed_v6_10985_0_1	247.516	258.659	236.372	0.913835	-0.129994	0.609339	1
928	dd_Smed_v6_10986_0_1	417.914	403.336	432.493	1.07229	0.100697	0.551912	1
929	dd_Smed_v6_10987_0_1	420.709	417.168	424.251	1.01698	0.0242907	0.836622	1
930	dd_Smed_v6_10988_0_1	357.155	322.146	392.164	1.21735	0.283745	0.212667	1
931	dd_Smed_v6_10989_0_1	455.043	444.913	465.174	1.04554	0.0642474	0.806268	1
932	dd_Smed_v6_1098_0_1	10243.2	11010.5	9475.97	0.860629	-0.216537	0.285435	1
933	dd_Smed_v6_10990_0_1	651.311	758.414	544.207	0.71756	-0.478829	0.016317	1
934	dd_Smed_v6_10994_0_1	322.326	301.418	343.234	1.13873	0.187426	0.599116	1
935	dd_Smed_v6_10996_0_1	288.545	251.806	325.284	1.29181	0.369388	0.112454	1
936	dd_Smed_v6_10997_0_1	516.442	497.928	534.956	1.07436	0.103483	0.645142	1
937	dd_Smed_v6_10998_0_1	226.842	227.405	226.28	0.995049	-0.00716065	0.989962	1
938	dd_Smed_v6_10999_0_1	16.3827	16.6103	16.1552	0.972598	-0.0400842	0.840079	1
939	dd_Smed_v6_1099_0_1	4636.37	4862.63	4410.11	0.906939	-0.140922	0.525503	1
940	dd_Smed_v6_10_0_1	39467.4	40937.6	37997.3	0.928175	-0.107531	0.595097	1
941	dd_Smed_v6_10_1_1	63222.4	56158	70286.8	1.25159	0.323761	0.569566	1
942	dd_Smed_v6_11000_0_1	130.06	122.256	137.863	1.12765	0.173325	0.826356	1
943	dd_Smed_v6_11002_0_1	262.795	251.734	273.857	1.08788	0.12152	0.580114	1
944	dd_Smed_v6_11003_0_1	47.0337	35.6334	58.4341	1.63987	0.713582	0.296665	1
945	dd_Smed_v6_11004_0_1	812.273	745.987	878.559	1.17771	0.235988	0.242826	1
946	dd_Smed_v6_11005_0_1	232.159	224.481	239.836	1.0684	0.095457	0.626236	1
947	dd_Smed_v6_11006_0_1	271.778	290.808	252.748	0.869123	-0.202368	0.580559	1
948	dd_Smed_v6_11007_0_1	402.93	378.861	426.999	1.12706	0.172565	0.449739	1
949	dd_Smed_v6_11008_0_1	261.442	266.358	256.526	0.963085	-0.0542654	0.872707	1
950	dd_Smed_v6_11009_0_1	19.1252	20.2076	18.0428	0.892869	-0.16348	0.871796	1
951	dd_Smed_v6_1100_0_1	4854.45	4996.43	4712.47	0.943169	-0.0844121	0.661553	1
952	dd_Smed_v6_11010_0_1	425.844	453.881	397.807	0.876457	-0.190245	0.350663	1
953	dd_Smed_v6_11011_0_1	174.379	156.909	191.848	1.22267	0.290034	0.483751	1
954	dd_Smed_v6_11012_0_1	208.903	223.473	194.332	0.8696	-0.201576	0.393977	1
955	dd_Smed_v6_11013_0_1	109.875	97.3463	122.403	1.2574	0.330447	0.348228	1
956	dd_Smed_v6_11014_0_1	77.4879	91.4413	63.5346	0.694813	-0.525304	0.0431496	1
957	dd_Smed_v6_11015_0_1	10.9456	13.4092	8.48198	0.632547	-0.660756	0.266536	1
958	dd_Smed_v6_11017_0_1	410.253	461.553	358.952	0.777705	-0.362704	0.0862922	1
959	dd_Smed_v6_11018_0_1	132.234	107.964	156.504	1.4496	0.535652	0.356207	1
960	dd_Smed_v6_11019_0_1	489.779	495.774	483.783	0.975814	-0.0353224	0.885351	1
961	dd_Smed_v6_1101_0_1	3878.82	4025.15	3732.48	0.92729	-0.108908	0.558876	1
962	dd_Smed_v6_11021_0_1	99.7799	101.016	98.544	0.97553	-0.0357412	0.89604	1
963	dd_Smed_v6_11022_0_1	176.736	174.803	178.67	1.02212	0.0315694	0.83078	1
964	dd_Smed_v6_11023_0_1	310.35	318.219	302.481	0.950544	-0.0731753	0.77396	1
965	dd_Smed_v6_11023_1_1	151.241	158.639	143.842	0.906726	-0.141261	0.684898	1
966	dd_Smed_v6_11024_0_1	328.377	325.995	330.759	1.01462	0.0209327	0.893888	1
967	dd_Smed_v6_11025_0_1	133.193	127.551	138.835	1.08846	0.122293	0.584116	1
968	dd_Smed_v6_11026_0_1	130.767	127.659	133.876	1.0487	0.0685953	0.773261	1
969	dd_Smed_v6_11027_0_1	152.67	155.236	150.104	0.966946	-0.0484932	0.818077	1
970	dd_Smed_v6_1102_0_1	6725.45	7064.2	6386.71	0.904095	-0.145454	0.632032	1
971	dd_Smed_v6_11031_0_1	77.3623	84.0695	70.6551	0.840436	-0.25079	0.388424	1
972	dd_Smed_v6_11032_0_1	145.237	146.968	143.506	0.976438	-0.0344003	0.806187	1
973	dd_Smed_v6_11034_0_1	556.4	545.612	567.188	1.03954	0.0559514	0.738374	1
974	dd_Smed_v6_11037_0_1	154.391	180.613	128.168	0.709627	-0.494867	0.0549647	1
975	dd_Smed_v6_11039_0_1	177.314	181.745	172.883	0.951236	-0.0721248	0.808365	1
976	dd_Smed_v6_1103_0_1	1436.8	1667.05	1206.55	0.723763	-0.466411	0.0183189	1
977	dd_Smed_v6_11040_0_1	442.029	440.709	443.349	1.00599	0.008615	0.952964	1
978	dd_Smed_v6_11041_0_1	316.803	333.761	299.845	0.898382	-0.154598	0.507196	1
979	dd_Smed_v6_11042_1_1	408.681	420.723	396.64	0.942757	-0.0850419	0.788807	1
980	dd_Smed_v6_11045_0_1	20.5564	16.6651	24.4477	1.467	0.552865	0.214404	1
981	dd_Smed_v6_11046_0_1	182.434	174.296	190.573	1.09339	0.128802	0.522376	1
982	dd_Smed_v6_11047_0_1	237.29	262.816	211.765	0.805752	-0.311592	0.125045	1
983	dd_Smed_v6_11048_0_1	223.122	221.193	225.051	1.01744	0.0249475	0.918783	1
984	dd_Smed_v6_11049_0_1	149.902	143.672	156.133	1.08674	0.12	0.620571	1
985	dd_Smed_v6_1104_0_1	8264.22	8624.76	7903.69	0.916395	-0.125959	0.51888	1
986	dd_Smed_v6_11050_0_1	75.6984	76.0303	75.3665	0.99127	-0.0126504	0.954054	1
987	dd_Smed_v6_11051_0_1	213.868	214.606	213.13	0.993124	-0.00995454	0.957821	1
988	dd_Smed_v6_11053_0_1	100.194	86.6968	113.691	1.31136	0.391065	0.119341	1
989	dd_Smed_v6_11054_0_1	63.0919	62.5688	63.615	1.01672	0.0239247	0.975673	1
990	dd_Smed_v6_11057_0_1	62.551	53.2879	71.814	1.34766	0.430457	0.497712	1
991	dd_Smed_v6_11059_0_1	40.6061	37.5275	43.6847	1.16407	0.219179	0.539423	1
992	dd_Smed_v6_11060_0_1	127.57	127.738	127.401	0.997365	-0.00380689	0.95971	1
993	dd_Smed_v6_11061_0_1	279.073	282.425	275.722	0.976267	-0.034653	0.877108	1
994	dd_Smed_v6_11062_0_1	232.524	207.184	257.864	1.24462	0.315701	0.192903	1
995	dd_Smed_v6_11063_0_1	209.761	209.548	209.973	1.00203	0.00292081	0.95632	1
996	dd_Smed_v6_11065_0_1	8.34291	5.95705	10.7288	1.80102	0.848815	0.416685	1
997	dd_Smed_v6_11066_0_1	270.735	271.976	269.494	0.990876	-0.0132234	0.907768	1
998	dd_Smed_v6_11067_0_1	536.154	532.967	539.34	1.01196	0.0171495	0.946477	1
999	dd_Smed_v6_11068_0_1	234.221	235.554	232.888	0.98868	-0.0164248	0.923464	1
1000	dd_Smed_v6_1106_0_1	7750.92	7885.48	7616.36	0.965872	-0.0500964	0.846477	1
1001	dd_Smed_v6_11070_0_1	447.321	451.618	443.024	0.98097	-0.0277188	0.929811	1
1002	dd_Smed_v6_11071_0_1	135.954	121.87	150.038	1.23113	0.299978	0.414502	1
1003	dd_Smed_v6_11072_0_1	294.225	289.706	298.745	1.0312	0.0443266	0.84271	1
1004	dd_Smed_v6_11073_0_1	190.265	190.665	189.865	0.995802	-0.00606872	1	1
1005	dd_Smed_v6_11074_0_1	297.494	280.15	314.838	1.12382	0.168409	0.416394	1
1006	dd_Smed_v6_11075_0_1	90.9997	89.3362	92.6632	1.03724	0.0527506	1	1
1007	dd_Smed_v6_11076_0_1	117.791	102.675	132.906	1.29443	0.372314	0.181728	1
1008	dd_Smed_v6_11077_0_1	321.854	332.982	310.726	0.933162	-0.0998	0.742153	1
1009	dd_Smed_v6_11078_0_1	168.094	189.216	146.972	0.77674	-0.364496	0.112309	1
1010	dd_Smed_v6_11079_0_1	73.7406	73.3139	74.1674	1.01164	0.0166986	1	1
1011	dd_Smed_v6_1107_0_1	6099.6	6518.92	5680.27	0.871351	-0.198673	0.343209	1
1012	dd_Smed_v6_11081_0_1	182.656	191.738	173.574	0.905268	-0.143584	0.51405	1
1013	dd_Smed_v6_11083_0_1	150.192	137.09	163.294	1.19115	0.252353	0.469552	1
1014	dd_Smed_v6_11084_0_1	137.256	126.038	148.473	1.178	0.236342	0.724876	1
1015	dd_Smed_v6_11085_0_1	397.843	378.814	416.873	1.10047	0.138121	0.581525	1
1016	dd_Smed_v6_11087_0_1	226.123	208.316	243.93	1.17096	0.227694	0.340187	1
1017	dd_Smed_v6_11088_0_2	192.681	197.461	187.901	0.951585	-0.0715951	0.818387	1
1018	dd_Smed_v6_11089_0_1	254.021	222.69	285.353	1.28139	0.357709	0.104861	1
1019	dd_Smed_v6_11090_0_1	98.2501	105.765	90.7351	0.857893	-0.221131	0.533243	1
1020	dd_Smed_v6_11091_0_1	174.649	173.903	175.395	1.00858	0.0123184	1	1
1021	dd_Smed_v6_11092_0_1	384.179	396.017	372.341	0.940215	-0.0889373	0.631897	1
1022	dd_Smed_v6_11093_0_1	271.727	261.633	281.821	1.07716	0.107235	0.634285	1
1023	dd_Smed_v6_11096_0_1	137.232	144.708	129.757	0.896683	-0.15733	0.5019	1
1024	dd_Smed_v6_11097_0_1	303.172	324.121	282.223	0.870734	-0.199697	0.391737	1
1025	dd_Smed_v6_11098_0_1	86.2434	83.5413	88.9455	1.06469	0.0904324	0.804638	1
1026	dd_Smed_v6_11099_0_1	161.521	160.893	162.148	1.0078	0.0112069	0.982478	1
1027	dd_Smed_v6_1109_0_1	5520.58	5755.07	5286.1	0.918513	-0.122629	0.545801	1
1028	dd_Smed_v6_110_0_1	8178.04	8546.4	7809.68	0.913798	-0.130053	0.523245	1
1029	dd_Smed_v6_11100_0_1	218.742	227.848	209.637	0.920073	-0.120179	0.592334	1
1030	dd_Smed_v6_11101_0_1	69.1802	65.6504	72.71	1.10753	0.147351	0.929309	1
1031	dd_Smed_v6_11103_1_1	233.473	243.995	222.951	0.913751	-0.130127	0.517296	1
1032	dd_Smed_v6_11104_0_1	98.9966	84.2013	113.792	1.35143	0.434484	0.426163	1
1033	dd_Smed_v6_11106_0_1	126.524	114.882	138.166	1.20267	0.266243	0.296087	1
1034	dd_Smed_v6_11107_0_1	405.07	387.76	422.379	1.08928	0.123374	0.558702	1
1035	dd_Smed_v6_11109_0_1	450.227	432.7	467.753	1.08101	0.112378	0.686087	1
1036	dd_Smed_v6_1110_0_1	4735.43	4793.97	4676.88	0.975574	-0.0356761	0.885848	1
1037	dd_Smed_v6_11111_2_1	30.1469	21.3848	38.909	1.81947	0.86352	0.0450659	1
1038	dd_Smed_v6_11112_0_1	183.908	177.355	190.46	1.07389	0.102845	0.566793	1
1039	dd_Smed_v6_11113_0_1	234.725	227.885	241.565	1.06003	0.0841032	0.595677	1
1040	dd_Smed_v6_11115_0_1	429.111	413.919	444.302	1.0734	0.102191	0.616836	1
1041	dd_Smed_v6_11117_0_1	233.01	237.339	228.681	0.963517	-0.0536175	0.880801	1
1042	dd_Smed_v6_11118_0_1	426.161	439.61	412.712	0.938815	-0.0910869	0.712612	1
1043	dd_Smed_v6_1111_0_1	6101.92	6071.53	6132.3	1.01001	0.0143674	0.901408	1
1044	dd_Smed_v6_11120_0_1	299.501	306.071	292.932	0.95707	-0.0633037	0.693448	1
1045	dd_Smed_v6_11121_0_1	155.326	155.749	154.903	0.994564	-0.00786436	0.969209	1
1046	dd_Smed_v6_11122_0_1	132.437	127.749	137.126	1.0734	0.102193	0.716939	1
1047	dd_Smed_v6_11123_0_1	325.834	341.645	310.023	0.907442	-0.140122	0.560533	1
1048	dd_Smed_v6_11124_0_1	166.63	168.72	164.54	0.975223	-0.0361963	0.80197	1
1049	dd_Smed_v6_11125_0_1	91.7554	82.9657	100.545	1.21189	0.277255	0.327511	1
1050	dd_Smed_v6_11125_1_1	6.05423	6.67295	5.43552	0.81456	-0.295908	0.69838	1
1051	dd_Smed_v6_11127_0_1	383.91	375.418	392.402	1.04524	0.0638348	0.784673	1
1052	dd_Smed_v6_11128_0_1	277.784	265.867	289.702	1.08965	0.123864	0.544852	1
1053	dd_Smed_v6_11130_0_1	236.206	228.19	244.221	1.07026	0.0979555	0.55374	1
1054	dd_Smed_v6_11131_0_1	61.0853	61.2479	60.9228	0.994693	-0.00767664	0.961509	1
1055	dd_Smed_v6_11132_0_1	109.72	101.48	117.961	1.1624	0.21711	0.505889	1
1056	dd_Smed_v6_11133_0_1	221.497	215.535	227.458	1.05532	0.0776817	0.717725	1
1057	dd_Smed_v6_11134_0_1	158.376	153.926	162.827	1.05783	0.0811034	0.703985	1
1058	dd_Smed_v6_11135_0_1	400.327	407.455	393.198	0.965008	-0.0513875	0.836673	1
1059	dd_Smed_v6_11136_0_1	29.8587	23.5359	36.1815	1.53729	0.620386	0.374685	1
1060	dd_Smed_v6_11137_0_1	293.594	298.616	288.572	0.966363	-0.0493628	0.915783	1
1061	dd_Smed_v6_1113_0_1	3559.79	3757.62	3361.96	0.894703	-0.160519	0.45231	1
1062	dd_Smed_v6_11140_0_1	262.868	264.664	261.072	0.986428	-0.019715	0.952862	1
1063	dd_Smed_v6_11141_0_1	520.261	449.296	591.227	1.3159	0.396047	0.0555145	1
1064	dd_Smed_v6_11142_0_1	143.837	138.803	148.872	1.07255	0.101042	0.723386	1
1065	dd_Smed_v6_11144_0_1	162.382	188	136.764	0.727467	-0.459046	0.0556689	1
1066	dd_Smed_v6_11145_0_1	414.295	427.368	401.222	0.93882	-0.0910789	0.73848	1
1067	dd_Smed_v6_11146_0_1	134.963	149.463	120.463	0.805973	-0.311197	0.322288	1
1068	dd_Smed_v6_11148_0_1	454.681	474.9	434.461	0.914849	-0.128394	0.552513	1
1069	dd_Smed_v6_11149_0_1	365.639	344.032	387.245	1.12561	0.170705	0.38528	1
1070	dd_Smed_v6_1114_0_1	9959.26	9627.97	10290.6	1.06882	0.0960169	0.546661	1
1071	dd_Smed_v6_11150_0_1	352.558	360.777	344.339	0.954437	-0.0672781	0.866532	1
1072	dd_Smed_v6_11151_0_1	49.0764	55.1429	43.0099	0.779972	-0.358506	0.153839	1
1073	dd_Smed_v6_11152_0_1	451.335	449.497	453.173	1.00818	0.0117483	0.984545	1
1074	dd_Smed_v6_11153_0_1	195.373	198.875	191.871	0.964783	-0.0517234	0.779579	1
1075	dd_Smed_v6_11154_0_1	186.73	183.315	190.145	1.03726	0.0527758	0.897039	1
1076	dd_Smed_v6_11155_0_1	127.922	111.943	143.9	1.28548	0.362304	0.452454	1
1077	dd_Smed_v6_11156_0_1	56.9694	46.931	67.0079	1.42779	0.513789	0.371424	1
1078	dd_Smed_v6_11157_0_1	339.405	359.977	318.833	0.885704	-0.175103	0.425394	1
1079	dd_Smed_v6_11158_0_1	202.82	189.36	216.279	1.14216	0.191761	0.43314	1
1080	dd_Smed_v6_1115_0_1	1228.55	1268.29	1188.81	0.937335	-0.0933627	0.625479	1
1081	dd_Smed_v6_11160_0_1	335.662	353.756	317.569	0.897707	-0.155684	0.538131	1
1082	dd_Smed_v6_11161_0_1	77.249	64.4712	90.0267	1.39638	0.481697	0.441107	1
1083	dd_Smed_v6_11162_0_1	182.872	190.065	175.679	0.924313	-0.113547	0.704566	1
1084	dd_Smed_v6_11163_0_1	366.471	379.172	353.77	0.933005	-0.100043	0.817013	1
1085	dd_Smed_v6_11164_0_1	173.246	161.926	184.565	1.13982	0.1888	0.503096	1
1086	dd_Smed_v6_11165_0_1	127.686	133.8	121.572	0.908612	-0.138264	0.486752	1
1087	dd_Smed_v6_11168_0_1	248.33	238.639	258.022	1.08122	0.11266	0.639086	1
1088	dd_Smed_v6_11169_0_1	88.6576	95.7848	81.5304	0.851183	-0.232459	0.537443	1
1089	dd_Smed_v6_11170_0_1	172.539	180.539	164.539	0.911377	-0.133881	0.587427	1
1090	dd_Smed_v6_11171_1_1	12.5382	11.4955	13.5808	1.1814	0.240503	0.696021	1
1091	dd_Smed_v6_11172_0_1	260.38	257.477	263.283	1.02255	0.0321705	0.832094	1
1092	dd_Smed_v6_11175_0_1	143.063	138.29	147.836	1.06903	0.0963066	0.874814	1
1093	dd_Smed_v6_11176_0_1	176.991	184.418	169.565	0.919463	-0.121137	0.547512	1
1094	dd_Smed_v6_11177_0_1	341.721	353.583	329.859	0.932904	-0.1002	0.711099	1
1095	dd_Smed_v6_11178_0_1	41.1544	49.0114	33.2974	0.67938	-0.557709	0.143761	1
1096	dd_Smed_v6_11179_0_1	287.342	264.749	309.934	1.17067	0.227337	0.314094	1
1097	dd_Smed_v6_1117_0_1	737.301	743.246	731.356	0.984003	-0.0232648	0.957543	1
1098	dd_Smed_v6_11181_0_1	82.5552	85.4959	79.6145	0.931208	-0.102824	0.699305	1
1099	dd_Smed_v6_11182_0_1	193.671	183.767	203.575	1.10779	0.147685	0.637373	1
1100	dd_Smed_v6_11184_0_1	427.298	401.41	453.186	1.12899	0.175027	0.390467	1
1101	dd_Smed_v6_11185_0_1	178.964	185.598	172.329	0.928505	-0.107018	0.728108	1
1102	dd_Smed_v6_11186_0_1	158.4	147.045	169.754	1.15443	0.207183	0.394374	1
1103	dd_Smed_v6_11187_0_1	205.017	196.459	213.576	1.08713	0.120523	0.657481	1
1104	dd_Smed_v6_11189_0_1	378.582	393.858	363.306	0.92243	-0.116488	0.59702	1
1105	dd_Smed_v6_1118_0_1	3153.5	3092.4	3214.6	1.03952	0.0559106	0.811766	1
1106	dd_Smed_v6_11190_0_1	111.933	102.401	121.466	1.18618	0.246325	0.461243	1
1107	dd_Smed_v6_11191_0_5	76.5694	72.3589	80.7799	1.11638	0.158825	0.733723	1
1108	dd_Smed_v6_11192_0_1	64.6864	67.9025	61.4703	0.905274	-0.143574	0.839719	1
1109	dd_Smed_v6_11193_0_1	286.117	259.327	312.907	1.20661	0.270963	0.209	1
1110	dd_Smed_v6_11194_0_1	209.268	202.553	215.982	1.0663	0.0926084	0.644276	1
1111	dd_Smed_v6_11196_0_1	93.8945	107.437	80.3523	0.747904	-0.419074	0.0577226	1
1112	dd_Smed_v6_11197_0_1	152.539	137.565	167.514	1.21771	0.28417	0.205197	1
1113	dd_Smed_v6_11198_0_1	301.636	318.767	284.506	0.892521	-0.164043	0.50887	1
1114	dd_Smed_v6_11199_0_1	439.572	459.396	419.749	0.913697	-0.130212	0.560496	1
1115	dd_Smed_v6_111_0_1	13365.1	12277.5	14452.7	1.17717	0.235318	0.469811	1
1116	dd_Smed_v6_11200_0_1	249.488	223.291	275.685	1.23464	0.304096	0.438348	1
1117	dd_Smed_v6_11201_0_1	232.587	243.608	221.567	0.909522	-0.136819	0.562317	1
1118	dd_Smed_v6_11203_0_1	122.363	123.304	121.421	0.984723	-0.02221	0.794073	1
1119	dd_Smed_v6_11206_0_1	243.706	250.793	236.62	0.943489	-0.083922	0.772582	1
1120	dd_Smed_v6_11207_0_1	108.126	96.6924	119.559	1.23649	0.306251	0.275783	1
1121	dd_Smed_v6_11208_0_1	309.553	307.402	311.703	1.01399	0.0200447	0.860851	1
1122	dd_Smed_v6_1120_0_1	5944.91	6421.26	5468.57	0.851634	-0.231694	0.189987	1
1123	dd_Smed_v6_11210_0_1	298.559	263.586	333.532	1.26536	0.33955	0.128359	1
1124	dd_Smed_v6_11211_0_1	172.429	160.919	183.939	1.14305	0.192889	0.532818	1
1125	dd_Smed_v6_11212_1_1	410.412	394.243	426.581	1.08203	0.113736	0.541029	1
1126	dd_Smed_v6_11213_0_1	6.51101	10.2363	2.78569	0.272138	-1.87759	0.0191169	1
1127	dd_Smed_v6_11214_0_1	132.654	118.038	147.269	1.24765	0.319212	0.351553	1
1128	dd_Smed_v6_11216_0_1	257.646	314.656	200.636	0.637636	-0.649195	0.00274411	0.433394
1129	dd_Smed_v6_11217_0_1	14.1092	14.303	13.9154	0.972898	-0.03964	0.853719	1
1130	dd_Smed_v6_1121_0_1	3025.62	2999.98	3051.26	1.0171	0.0244558	0.923076	1
1131	dd_Smed_v6_11220_0_1	145.941	149.642	142.24	0.950531	-0.0731937	0.826108	1
1132	dd_Smed_v6_11221_0_1	130.9	121.316	140.483	1.158	0.21163	0.688566	1
1133	dd_Smed_v6_11223_0_1	351.081	357.178	344.983	0.965856	-0.0501193	0.833231	1
1134	dd_Smed_v6_11225_0_1	175.694	185.518	165.871	0.894093	-0.161503	0.556	1
1135	dd_Smed_v6_11226_0_1	205.7	191.286	220.113	1.1507	0.202515	0.579062	1
1136	dd_Smed_v6_11227_0_1	175.162	168.574	181.75	1.07816	0.108574	0.682582	1
1137	dd_Smed_v6_11228_0_1	246.999	230.45	263.548	1.14362	0.193613	0.447566	1
1138	dd_Smed_v6_11229_0_1	207.607	195.371	219.844	1.12526	0.170262	0.416737	1
1139	dd_Smed_v6_1122_0_1	11685.6	12294.4	11076.9	0.900968	-0.150452	0.470724	1
1140	dd_Smed_v6_11230_0_1	46.1498	41.3964	50.9032	1.22965	0.298252	0.537818	1
1141	dd_Smed_v6_11231_0_1	303.429	313.975	292.883	0.932825	-0.100322	0.70134	1
1142	dd_Smed_v6_11232_0_1	285.316	270.944	299.687	1.10609	0.145465	0.600185	1
1143	dd_Smed_v6_11234_0_1	282.507	289.957	275.057	0.948615	-0.0761054	0.787659	1
1144	dd_Smed_v6_11236_0_1	139.676	144.624	134.727	0.931564	-0.102273	0.768844	1
1145	dd_Smed_v6_11237_0_1	286.181	318.806	253.556	0.795329	-0.330376	0.138741	1
1146	dd_Smed_v6_11238_0_1	453.106	425.127	481.084	1.13163	0.178396	0.459934	1
1147	dd_Smed_v6_11239_0_1	26.1023	26.38	25.8247	0.978952	-0.0306905	0.944688	1
1148	dd_Smed_v6_1123_0_1	4894.44	5522.69	4266.19	0.772484	-0.372423	0.0562577	1
1149	dd_Smed_v6_11240_0_1	274.832	262.887	286.777	1.09088	0.12549	0.669395	1
1150	dd_Smed_v6_11241_0_1	172.112	188.702	155.522	0.824166	-0.278993	0.182605	1
1151	dd_Smed_v6_11243_0_1	158.468	146.665	170.27	1.16095	0.2153	0.394056	1
1152	dd_Smed_v6_11245_0_1	422.777	432.569	412.985	0.954726	-0.0668415	0.876509	1
1153	dd_Smed_v6_11246_0_1	185.489	186.269	184.71	0.991628	-0.0121292	0.984614	1
1154	dd_Smed_v6_11247_0_1	126.78	126.794	126.766	0.99978	-0.000316965	0.99542	1
1155	dd_Smed_v6_11248_0_1	282.501	258.75	306.251	1.18358	0.243157	0.474554	1
1156	dd_Smed_v6_11249_0_1	27.8534	21.3243	34.3826	1.61236	0.689177	0.074969	1
1157	dd_Smed_v6_1124_0_1	959.574	971.608	947.539	0.975228	-0.0361892	0.674784	1
1158	dd_Smed_v6_11251_0_1	354.806	411.133	298.479	0.725993	-0.461973	0.0259445	1
1159	dd_Smed_v6_11252_0_1	307.776	351.022	264.531	0.753603	-0.408123	0.0626052	1
1160	dd_Smed_v6_11253_0_1	111.448	113.945	108.95	0.956162	-0.0646731	0.893958	1
1161	dd_Smed_v6_11254_0_1	170.778	138.702	202.855	1.46253	0.548464	0.0281666	1
1162	dd_Smed_v6_11255_0_1	73.0828	67.9733	78.1924	1.15034	0.202061	0.542183	1
1163	dd_Smed_v6_11256_0_1	51.2683	44.551	57.9857	1.30156	0.380242	0.3303	1
1164	dd_Smed_v6_11258_0_1	19.7108	20.7015	18.72	0.90428	-0.145158	0.819968	1
1165	dd_Smed_v6_11259_0_1	765.312	762.711	767.914	1.00682	0.00980763	0.906952	1
1166	dd_Smed_v6_1125_0_1	4807.75	5165.02	4450.48	0.861657	-0.214814	0.32313	1
1167	dd_Smed_v6_11261_0_1	304.027	311.693	296.361	0.950812	-0.0727676	0.756952	1
1168	dd_Smed_v6_11262_0_1	160.894	145.929	175.859	1.2051	0.269149	0.317579	1
1169	dd_Smed_v6_11263_0_1	263.396	270.965	255.828	0.944134	-0.0829364	0.729757	1
1170	dd_Smed_v6_11264_0_1	107.744	99.5642	115.924	1.16432	0.219485	0.68142	1
1171	dd_Smed_v6_11265_0_1	183.53	172.535	194.526	1.12746	0.173075	0.564893	1
1172	dd_Smed_v6_11266_0_1	203.233	197.254	209.212	1.06062	0.084912	0.632673	1
1173	dd_Smed_v6_11267_0_1	326.734	303.933	349.536	1.15004	0.20169	0.404972	1
1174	dd_Smed_v6_11268_0_1	227.124	215.083	239.165	1.11197	0.153113	0.508915	1
1175	dd_Smed_v6_11269_0_1	211.036	207.576	214.497	1.03335	0.0473231	0.752461	1
1176	dd_Smed_v6_1126_0_1	1340.35	1166.69	1514	1.29769	0.375945	0.212825	1
1177	dd_Smed_v6_11270_0_1	117.653	117.031	118.276	1.01064	0.0152648	0.943915	1
1178	dd_Smed_v6_11271_0_1	385.381	337.944	432.817	1.28074	0.356974	0.210324	1
1179	dd_Smed_v6_11272_0_1	234.709	251.429	217.988	0.866997	-0.205901	0.405582	1
1180	dd_Smed_v6_11273_0_1	179.145	177.188	181.101	1.02208	0.0315147	0.996862	1
1181	dd_Smed_v6_11274_0_1	119.582	117.536	121.627	1.0348	0.0493547	0.942329	1
1182	dd_Smed_v6_11277_0_1	201.885	191.528	212.241	1.10815	0.148149	0.490309	1
1183	dd_Smed_v6_11279_0_1	238.21	228.805	247.616	1.08221	0.113983	0.648654	1
1184	dd_Smed_v6_1127_0_1	2854.74	3175.21	2534.27	0.798143	-0.325281	0.11107	1
1185	dd_Smed_v6_11280_0_1	218.348	222.212	214.484	0.965225	-0.0510634	0.798017	1
1186	dd_Smed_v6_11281_1_1	68.4408	61.8833	74.9982	1.21193	0.277305	0.272637	1
1187	dd_Smed_v6_11282_0_1	236.464	227.125	245.803	1.08224	0.114016	0.749267	1
1188	dd_Smed_v6_11283_0_1	196.255	191.324	201.186	1.05154	0.0725088	0.752332	1
3394	dd_Smed_v6_13919_0_1	30.9462	51.8525	10.0399	0.193625	-2.36866	2.31599e-08	1.73347e-05
1190	dd_Smed_v6_11286_0_1	42.0114	34.3564	49.6665	1.44563	0.531694	0.553555	1
1191	dd_Smed_v6_11287_0_1	132.255	139.862	124.647	0.891213	-0.166158	0.465152	1
1192	dd_Smed_v6_11288_0_1	24.4051	19.1409	29.6694	1.55005	0.632319	0.269664	1
1193	dd_Smed_v6_11289_0_1	257.521	242.068	272.975	1.12768	0.173355	0.450725	1
1194	dd_Smed_v6_1128_0_1	2462.64	2531.49	2393.8	0.945608	-0.0806857	0.78663	1
1195	dd_Smed_v6_11291_0_1	332.087	329.595	334.58	1.01512	0.0216572	0.923504	1
1196	dd_Smed_v6_11292_0_1	284.415	289.303	279.527	0.966206	-0.0495967	0.90414	1
1197	dd_Smed_v6_11293_0_1	244.187	220.631	267.742	1.21353	0.279208	0.387193	1
1198	dd_Smed_v6_11294_0_1	46.2224	52.2881	40.1566	0.767986	-0.380848	0.203663	1
1199	dd_Smed_v6_11295_1_1	252.418	270.196	234.64	0.868406	-0.203559	0.323662	1
1200	dd_Smed_v6_11296_0_1	488.672	481.676	495.667	1.02905	0.0413083	0.709403	1
1201	dd_Smed_v6_11297_0_1	146.917	130.653	163.181	1.24896	0.320725	0.513993	1
1202	dd_Smed_v6_11298_0_1	306.747	308.451	305.042	0.988947	-0.0160349	0.853534	1
1203	dd_Smed_v6_11299_0_1	215.67	221.948	209.392	0.943427	-0.0840176	0.724591	1
1204	dd_Smed_v6_1129_0_1	15.2214	27.6101	2.83262	0.102594	-3.28499	0.083925	1
1205	dd_Smed_v6_112_0_1	23914.1	22957.9	24870.3	1.0833	0.115436	0.634729	1
1206	dd_Smed_v6_11300_0_1	416.77	410.779	422.76	1.02917	0.0414754	0.749358	1
1207	dd_Smed_v6_11302_0_1	20.6622	18.613	22.7115	1.22019	0.287111	0.727376	1
1208	dd_Smed_v6_11303_0_1	45.9152	42.1598	49.6707	1.17815	0.236525	0.427166	1
1209	dd_Smed_v6_11304_0_1	302.904	302.245	303.562	1.00436	0.00627518	0.985472	1
1210	dd_Smed_v6_11305_0_1	77.5912	72.1925	82.9899	1.14957	0.201089	0.439478	1
1211	dd_Smed_v6_11306_0_1	320.613	329.686	311.541	0.944962	-0.0816725	0.689423	1
1212	dd_Smed_v6_11307_0_1	293.558	257.709	329.406	1.27821	0.354122	0.0788325	1
1213	dd_Smed_v6_11308_0_1	146.162	159.209	133.116	0.836108	-0.258239	0.294124	1
1214	dd_Smed_v6_1130_0_1	3985.74	4308.43	3663.04	0.850202	-0.234122	0.227408	1
1215	dd_Smed_v6_11310_0_1	365.508	365.362	365.654	1.0008	0.00115179	0.883677	1
1216	dd_Smed_v6_11311_0_1	267.768	269.314	266.223	0.988521	-0.0166559	0.993554	1
1217	dd_Smed_v6_11312_0_1	230.62	211.127	250.112	1.18465	0.24446	0.499127	1
1218	dd_Smed_v6_11313_0_1	162.934	161.251	164.617	1.02087	0.0298056	0.993161	1
1219	dd_Smed_v6_11314_0_1	120.682	118.397	122.967	1.03859	0.0546313	0.945432	1
1220	dd_Smed_v6_11315_0_1	94.918	93.5407	96.2952	1.02945	0.0418694	1	1
1221	dd_Smed_v6_11316_0_1	56.021	55.5542	56.4878	1.0168	0.0240425	0.947711	1
1222	dd_Smed_v6_11317_0_1	421.132	413.299	428.966	1.03791	0.0536771	0.733975	1
1223	dd_Smed_v6_11318_0_1	185.201	182.886	187.516	1.02532	0.0360693	0.758115	1
1224	dd_Smed_v6_11319_0_1	254.49	240.383	268.596	1.11737	0.160101	0.466189	1
1225	dd_Smed_v6_1131_0_1	5016.19	5550.65	4481.73	0.807424	-0.308602	0.11911	1
1226	dd_Smed_v6_11320_0_1	91.5211	97.264	85.7781	0.88191	-0.181297	0.443195	1
1227	dd_Smed_v6_11322_0_1	135.617	128.063	143.172	1.11798	0.160899	0.495271	1
1228	dd_Smed_v6_11323_0_1	107.728	102.393	113.063	1.10421	0.143012	0.596004	1
1229	dd_Smed_v6_11324_0_1	248.499	242.875	254.123	1.04632	0.0653174	0.730749	1
1230	dd_Smed_v6_11325_0_1	57.352	45.0803	69.6238	1.54444	0.627085	0.405971	1
1231	dd_Smed_v6_11326_0_1	43.8146	48.8204	38.8088	0.794928	-0.331103	0.289608	1
1232	dd_Smed_v6_11327_0_1	368.524	367.617	369.43	1.00493	0.00709465	0.993408	1
1233	dd_Smed_v6_11328_0_10	60.0397	59.7033	60.376	1.01127	0.0161643	0.928419	1
1234	dd_Smed_v6_11329_0_1	374.17	379.354	368.985	0.972667	-0.0399815	0.904542	1
1235	dd_Smed_v6_1132_0_1	9281.84	9015.03	9548.65	1.05919	0.0829645	0.706546	1
1236	dd_Smed_v6_11330_0_1	404.772	397.001	412.543	1.03915	0.0554013	0.823206	1
1237	dd_Smed_v6_11331_0_1	63.1106	65.5144	60.7069	0.926618	-0.109953	0.703877	1
1238	dd_Smed_v6_11332_0_1	125.522	126.736	124.308	0.980841	-0.0279094	0.968854	1
1239	dd_Smed_v6_11334_0_1	222.973	196.796	249.15	1.26603	0.340311	0.142043	1
1240	dd_Smed_v6_11335_0_1	248.402	249.919	246.884	0.987856	-0.017628	0.965612	1
1241	dd_Smed_v6_11336_0_1	173.71	176.479	170.942	0.968622	-0.0459941	0.949409	1
1242	dd_Smed_v6_11337_0_1	249.266	231.325	267.206	1.15511	0.208031	0.31348	1
1243	dd_Smed_v6_1133_0_1	359.768	334.168	385.368	1.15322	0.205666	0.733892	1
1244	dd_Smed_v6_11341_0_1	371.769	408.24	335.297	0.821323	-0.283979	0.185158	1
1245	dd_Smed_v6_11342_0_1	290.723	308.954	272.493	0.881984	-0.181175	0.51276	1
1246	dd_Smed_v6_11343_0_1	43.6425	34.4853	52.7998	1.53108	0.614552	0.479917	1
1247	dd_Smed_v6_11344_0_1	483.149	462.494	503.804	1.08932	0.123428	0.533282	1
1248	dd_Smed_v6_11345_0_1	248.997	244.809	253.185	1.03421	0.0485326	0.75191	1
1249	dd_Smed_v6_11346_0_1	173.571	146.953	200.189	1.36227	0.446007	0.236969	1
1250	dd_Smed_v6_11349_0_1	297.519	303.923	291.115	0.957858	-0.0621159	0.875847	1
1251	dd_Smed_v6_1134_0_1	1803.58	1948.29	1658.87	0.85145	-0.232007	0.35694	1
1252	dd_Smed_v6_11351_0_1	386.222	390.145	382.3	0.979892	-0.0293051	0.945679	1
1253	dd_Smed_v6_11352_0_1	204.553	188.068	221.038	1.17531	0.233041	0.311821	1
1254	dd_Smed_v6_11353_0_1	235.098	211.024	259.172	1.22816	0.296501	0.211603	1
1255	dd_Smed_v6_11354_0_1	282.647	268.468	296.826	1.10563	0.144869	0.556894	1
1256	dd_Smed_v6_11355_0_1	66.2734	83.9321	48.6147	0.579214	-0.787831	0.0269874	1
1257	dd_Smed_v6_11356_0_1	127.763	131.66	123.866	0.940805	-0.0880324	0.636305	1
1258	dd_Smed_v6_11357_0_1	165.414	181.542	149.286	0.822323	-0.282222	0.245699	1
1259	dd_Smed_v6_11358_0_1	164.187	159.305	169.07	1.0613	0.0858305	0.799398	1
1260	dd_Smed_v6_11359_0_1	221.135	214.514	227.757	1.06174	0.086426	0.7587	1
1261	dd_Smed_v6_1135_0_1	3932.46	4099.69	3765.23	0.918418	-0.122777	0.548946	1
1262	dd_Smed_v6_11360_0_1	74.4874	74.6197	74.355	0.996452	-0.00512711	1	1
1263	dd_Smed_v6_11363_0_1	308.212	300.866	315.557	1.04883	0.0687797	0.803212	1
1264	dd_Smed_v6_11365_0_1	311.276	322.781	299.772	0.928716	-0.10669	0.673657	1
1265	dd_Smed_v6_11366_0_1	380.141	390.137	370.145	0.948756	-0.0758908	0.754316	1
1266	dd_Smed_v6_11367_0_1	293.401	297.09	289.711	0.975164	-0.036283	0.946647	1
1267	dd_Smed_v6_11368_0_1	128.063	116.224	139.902	1.20373	0.267508	0.535132	1
1268	dd_Smed_v6_1136_0_1	989.368	1033.21	945.522	0.915127	-0.127956	0.532531	1
1269	dd_Smed_v6_11370_0_1	281.511	291.541	271.481	0.931195	-0.102845	0.65295	1
1270	dd_Smed_v6_11371_0_1	140.093	132.897	147.288	1.10829	0.148331	0.680427	1
1271	dd_Smed_v6_11372_0_1	54.7309	47.9352	61.5266	1.28354	0.360127	0.193286	1
1272	dd_Smed_v6_11374_0_1	334.825	341.668	327.983	0.959946	-0.0589755	0.892436	1
1273	dd_Smed_v6_11375_0_1	102.076	92.1249	112.027	1.21603	0.282177	0.217754	1
1274	dd_Smed_v6_11376_0_1	270.747	286.015	255.479	0.893235	-0.162889	0.388724	1
1275	dd_Smed_v6_11377_0_1	308.783	305.126	312.441	1.02397	0.034175	0.764148	1
1276	dd_Smed_v6_11378_0_1	361.887	349.749	374.025	1.06941	0.096817	0.808225	1
1277	dd_Smed_v6_11379_0_1	96.3866	95.4617	97.3115	1.01938	0.0276871	1	1
1278	dd_Smed_v6_1137_0_1	10342.3	10324.4	10360.2	1.00347	0.00499987	0.967934	1
1279	dd_Smed_v6_11380_0_1	134.153	118.958	149.349	1.25548	0.328235	0.269754	1
1280	dd_Smed_v6_11382_0_1	110.341	106.444	114.238	1.07322	0.101941	0.655103	1
1281	dd_Smed_v6_11385_0_1	156.687	158.995	154.378	0.970965	-0.042509	0.960759	1
1282	dd_Smed_v6_11386_0_1	60.1517	54.8069	65.4965	1.19504	0.25706	0.441082	1
1283	dd_Smed_v6_11387_0_1	384.66	405.971	363.349	0.895012	-0.160021	0.408161	1
1284	dd_Smed_v6_11388_0_1	297.793	305.752	289.835	0.947943	-0.0771278	0.802161	1
1285	dd_Smed_v6_11389_0_1	58.6483	42.9193	74.3773	1.73296	0.793236	0.184596	1
1286	dd_Smed_v6_1138_0_1	622.797	620.844	624.749	1.00629	0.00904636	0.993591	1
1287	dd_Smed_v6_11390_0_1	344.885	340.974	348.796	1.02294	0.0327182	0.877638	1
1288	dd_Smed_v6_11391_0_1	250.384	255.428	245.34	0.960507	-0.0581322	0.865003	1
1289	dd_Smed_v6_11392_0_1	271.918	265.151	278.686	1.05104	0.0718238	0.857719	1
1290	dd_Smed_v6_11393_1_1	6.69122	6.07485	7.30759	1.20292	0.266547	0.752551	1
1291	dd_Smed_v6_11394_0_1	366.167	386.21	346.124	0.896206	-0.158097	0.543682	1
1292	dd_Smed_v6_11395_0_1	161.985	153.853	170.117	1.10571	0.144979	0.621157	1
1293	dd_Smed_v6_11396_0_1	273.928	263.152	284.703	1.0819	0.113562	0.589903	1
1294	dd_Smed_v6_11397_0_1	251.328	273.779	228.878	0.835994	-0.258436	0.235271	1
1295	dd_Smed_v6_11398_0_1	151.35	137.601	165.098	1.19983	0.262831	0.22588	1
1296	dd_Smed_v6_11399_0_1	181.143	171.144	191.142	1.11685	0.159434	0.534951	1
1297	dd_Smed_v6_1139_0_1	5213.25	5535.49	4891	0.883571	-0.178581	0.373156	1
1298	dd_Smed_v6_113_0_1	11280.3	11910.1	10650.5	0.894241	-0.161265	0.423527	1
1299	dd_Smed_v6_11400_0_1	251.872	248.76	254.985	1.02502	0.035656	0.902016	1
1300	dd_Smed_v6_11401_0_1	387.211	370.608	403.814	1.0896	0.123799	0.539275	1
1301	dd_Smed_v6_11402_0_1	114.738	119.079	110.398	0.927094	-0.109212	0.60637	1
1302	dd_Smed_v6_11403_0_1	103.137	99.128	107.146	1.08088	0.112209	0.631036	1
1303	dd_Smed_v6_11404_0_1	206.952	189.436	224.469	1.18493	0.244802	0.494554	1
1304	dd_Smed_v6_11405_0_1	394.998	444.328	345.668	0.777958	-0.362235	0.0843184	1
1305	dd_Smed_v6_11406_0_1	179.39	158.712	200.068	1.26058	0.334086	0.165848	1
1306	dd_Smed_v6_11408_0_1	276.463	241.229	311.697	1.29212	0.36974	0.110891	1
1307	dd_Smed_v6_11409_0_1	311.492	335.362	287.623	0.857649	-0.221541	0.380543	1
1308	dd_Smed_v6_1140_0_1	7917.52	8169.28	7665.77	0.938366	-0.091778	0.705136	1
1309	dd_Smed_v6_11410_0_1	33.4457	32.1141	34.7774	1.08293	0.114941	0.858329	1
1310	dd_Smed_v6_11411_0_3	57.1081	56.5747	57.6416	1.01886	0.0269526	0.89422	1
1311	dd_Smed_v6_11412_0_1	235.494	226.179	244.808	1.08236	0.114184	0.635404	1
1312	dd_Smed_v6_11413_0_1	98.7516	98.2627	99.2406	1.00995	0.0142853	0.936363	1
1313	dd_Smed_v6_11417_0_1	234.818	207.819	261.817	1.25983	0.333231	0.190923	1
1314	dd_Smed_v6_11419_0_1	5.59048	3.07763	8.10333	2.63297	1.39669	0.0796888	1
1315	dd_Smed_v6_1141_0_1	22.3311	21.6204	23.0417	1.06574	0.0918569	1	1
1316	dd_Smed_v6_11420_0_1	240.788	251.14	230.436	0.917558	-0.124129	0.528122	1
1317	dd_Smed_v6_11422_0_1	123.397	105.718	141.077	1.33446	0.416259	0.495543	1
1318	dd_Smed_v6_11423_0_1	39.2861	35.7699	42.8023	1.1966	0.258945	0.629949	1
1319	dd_Smed_v6_11424_0_2	189.353	180.955	197.751	1.09282	0.128053	0.563547	1
1320	dd_Smed_v6_11425_0_1	345.185	334.369	356.002	1.0647	0.0904445	0.659674	1
1321	dd_Smed_v6_11426_0_1	20.4998	23.5341	17.4654	0.742132	-0.430253	0.379209	1
1322	dd_Smed_v6_11428_0_1	327.468	339.737	315.199	0.927775	-0.108154	0.692869	1
1323	dd_Smed_v6_11429_0_1	290.754	298.21	283.299	0.949997	-0.0740049	0.763049	1
1324	dd_Smed_v6_1142_0_1	1653.34	1773.81	1532.87	0.864171	-0.210612	0.368866	1
1325	dd_Smed_v6_11432_0_1	223.018	208.352	237.684	1.14078	0.19002	0.464001	1
1326	dd_Smed_v6_11434_0_1	243.769	232.322	255.217	1.09855	0.135596	0.52504	1
1327	dd_Smed_v6_11435_0_1	140.017	142.212	137.822	0.969132	-0.0452356	0.764148	1
1328	dd_Smed_v6_11436_0_1	256.3	262.399	250.202	0.953517	-0.0686693	0.779377	1
1329	dd_Smed_v6_11439_0_1	177.972	175.583	180.361	1.02722	0.0387384	0.872705	1
1330	dd_Smed_v6_1143_0_1	2601.71	2687.1	2516.31	0.936441	-0.0947395	0.644221	1
1331	dd_Smed_v6_11440_0_1	274.369	274.986	273.752	0.995511	-0.0064903	0.900179	1
1332	dd_Smed_v6_11441_0_1	93.3848	81.344	105.425	1.29604	0.374115	0.673453	1
1333	dd_Smed_v6_11442_0_1	107.563	106.245	108.88	1.0248	0.0353476	1	1
1334	dd_Smed_v6_11443_0_1	63.9496	64.4489	63.4502	0.984504	-0.0225315	0.910761	1
1335	dd_Smed_v6_11444_0_1	250.805	235.934	265.676	1.12606	0.171287	0.43186	1
1336	dd_Smed_v6_11446_0_1	424.516	411.903	437.129	1.06124	0.0857558	0.7621	1
1337	dd_Smed_v6_11447_0_1	310.555	308.911	312.199	1.01064	0.0152728	0.947955	1
1338	dd_Smed_v6_11448_0_1	162.41	169.708	155.113	0.914	-0.129733	0.690208	1
1339	dd_Smed_v6_11449_0_1	260.279	227.517	293.042	1.288	0.365135	0.123616	1
1340	dd_Smed_v6_1144_0_1	8391.97	8778.96	8004.98	0.911836	-0.133153	0.574046	1
1341	dd_Smed_v6_11450_0_1	225.761	218.511	233.01	1.06635	0.0926855	0.753617	1
1342	dd_Smed_v6_11452_0_1	136.256	141.376	131.136	0.927568	-0.108476	0.549839	1
1343	dd_Smed_v6_11453_0_1	208.909	216.569	201.249	0.929258	-0.105849	0.798703	1
1344	dd_Smed_v6_11454_0_1	145.788	141.091	150.484	1.06658	0.0929885	0.802582	1
1345	dd_Smed_v6_11455_0_1	186.004	167.28	204.728	1.22386	0.291444	0.385282	1
1346	dd_Smed_v6_11456_0_1	385.022	410.186	359.858	0.877305	-0.18885	0.453647	1
1347	dd_Smed_v6_11457_0_1	193.703	192.919	194.487	1.00813	0.0116774	0.960253	1
1348	dd_Smed_v6_11458_0_1	251.695	240.162	263.228	1.09604	0.132299	0.610817	1
1349	dd_Smed_v6_11459_0_1	67.3668	66.2781	68.4556	1.03285	0.0466363	0.929562	1
1350	dd_Smed_v6_1145_0_1	3052.46	3262.4	2842.51	0.871295	-0.198766	0.347342	1
1351	dd_Smed_v6_11460_0_1	48.8262	40.5601	57.0922	1.40759	0.493232	0.356298	1
1352	dd_Smed_v6_11461_0_1	216.159	204.282	228.036	1.11628	0.158703	0.486014	1
1353	dd_Smed_v6_11462_0_1	358.566	357.15	359.983	1.00793	0.0113969	0.843021	1
1354	dd_Smed_v6_11463_0_1	149.225	132.857	165.593	1.2464	0.317769	0.212645	1
1355	dd_Smed_v6_11464_0_1	397.438	402.107	392.77	0.97678	-0.0338941	0.932011	1
1356	dd_Smed_v6_11465_0_1	349.43	369.826	329.035	0.889703	-0.168604	0.414961	1
1357	dd_Smed_v6_11466_0_1	393.421	354.635	432.207	1.21874	0.285386	0.180498	1
1358	dd_Smed_v6_11467_0_1	5.73865	6.04635	5.43096	0.898221	-0.154858	0.882975	1
1359	dd_Smed_v6_11468_0_1	47.2219	43.2932	51.1507	1.18149	0.240612	0.808376	1
1360	dd_Smed_v6_11469_0_1	74.6738	80.6158	68.7319	0.852586	-0.230083	0.459866	1
1361	dd_Smed_v6_1146_0_1	1732.64	1521.11	1944.17	1.27812	0.354025	0.332585	1
1362	dd_Smed_v6_11470_0_1	384.641	412.987	356.294	0.862725	-0.213027	0.326088	1
1363	dd_Smed_v6_11471_0_1	226.163	229.152	223.173	0.973908	-0.038142	0.993304	1
1364	dd_Smed_v6_11473_0_1	6.00515	6.11569	5.89461	0.96385	-0.0531199	1	1
1365	dd_Smed_v6_11474_0_1	153.004	132.818	173.191	1.30397	0.382914	0.117062	1
1366	dd_Smed_v6_11475_0_1	311.588	308.522	314.654	1.01988	0.0283942	0.906777	1
1367	dd_Smed_v6_11476_0_1	177.036	177.345	176.727	0.996511	-0.00504176	0.928852	1
1368	dd_Smed_v6_11478_0_1	117.038	125.413	108.663	0.866445	-0.206819	0.425229	1
1369	dd_Smed_v6_11479_0_1	235.236	222.413	248.06	1.11531	0.157446	0.698816	1
1370	dd_Smed_v6_1147_0_1	5829.12	5778.13	5880.11	1.01765	0.0252403	0.844747	1
1371	dd_Smed_v6_11480_0_1	281.115	268.876	293.353	1.09103	0.125695	0.551999	1
1372	dd_Smed_v6_11481_0_1	303.02	285.079	320.96	1.12586	0.171031	0.329729	1
1373	dd_Smed_v6_11484_0_1	189.889	173.692	206.086	1.1865	0.246715	0.337572	1
1374	dd_Smed_v6_11485_0_1	107.181	71.9078	142.453	1.98105	0.986269	0.000485874	0.110057
1375	dd_Smed_v6_11486_0_1	345.543	345.037	346.049	1.00293	0.00422481	0.97605	1
1376	dd_Smed_v6_11487_0_1	270.237	265.07	275.404	1.03899	0.0551766	0.859028	1
1377	dd_Smed_v6_11488_0_1	106.541	114.176	98.9048	0.866245	-0.207152	0.367366	1
1378	dd_Smed_v6_11489_0_1	226.226	206.732	245.721	1.1886	0.249259	0.506741	1
1379	dd_Smed_v6_1148_0_1	3548.39	3511.75	3585.03	1.02087	0.0297945	0.903447	1
1380	dd_Smed_v6_11491_0_1	139.526	131.564	147.488	1.12104	0.164833	0.560417	1
1381	dd_Smed_v6_11492_0_1	392.611	404.251	380.971	0.942412	-0.0855695	0.776966	1
1382	dd_Smed_v6_11493_0_1	536.579	495.884	577.274	1.16413	0.219254	0.224944	1
1383	dd_Smed_v6_11494_0_1	148.263	123.777	172.749	1.39565	0.480937	0.225862	1
1384	dd_Smed_v6_11495_0_1	127.205	126.494	127.917	1.01125	0.0161391	1	1
1385	dd_Smed_v6_11497_0_1	19.6674	15.4157	23.9191	1.5516	0.63376	0.106831	1
1386	dd_Smed_v6_11498_0_1	41.742	37.6108	45.8732	1.21968	0.286504	0.328228	1
1387	dd_Smed_v6_11499_0_1	198.567	156.343	240.791	1.54015	0.623068	0.0470876	1
1388	dd_Smed_v6_1149_0_1	5726.57	5737	5716.14	0.996363	-0.00525593	0.94088	1
1389	dd_Smed_v6_114_0_1	31314.9	32235.8	30394	0.942865	-0.0848769	0.670765	1
1390	dd_Smed_v6_11500_0_1	326.97	334.721	319.219	0.953684	-0.0684162	0.868283	1
1391	dd_Smed_v6_11501_0_1	255.356	218.915	291.797	1.33292	0.414593	0.0618614	1
1392	dd_Smed_v6_11502_0_1	233.367	232.032	234.702	1.01151	0.0165039	0.845863	1
1393	dd_Smed_v6_11503_0_1	199.199	214.963	183.436	0.853339	-0.228808	0.302779	1
1394	dd_Smed_v6_11504_0_1	294.094	310.409	277.78	0.894886	-0.160225	0.473004	1
1395	dd_Smed_v6_11505_0_1	178.082	186.198	169.967	0.912827	-0.131587	0.521706	1
1396	dd_Smed_v6_11507_0_1	273.544	264.824	282.264	1.06585	0.0920083	0.618512	1
1397	dd_Smed_v6_11508_0_1	177.078	159.936	194.219	1.21435	0.280189	0.25575	1
1398	dd_Smed_v6_1150_0_1	1601.47	1580.29	1622.65	1.0268	0.0381584	0.932391	1
1399	dd_Smed_v6_11510_0_1	253.054	242.345	263.763	1.08838	0.122179	0.576224	1
1400	dd_Smed_v6_11511_0_1	99.7233	99.5437	99.9029	1.00361	0.00519614	0.896123	1
1401	dd_Smed_v6_11512_0_1	170.193	156.377	184.009	1.1767	0.234743	0.331636	1
1402	dd_Smed_v6_11513_1_1	283.412	261.384	305.439	1.16855	0.224714	0.298142	1
1403	dd_Smed_v6_11514_0_1	359.357	348.535	370.179	1.0621	0.0869218	0.649654	1
1404	dd_Smed_v6_11519_0_1	408.414	432.809	384.02	0.887274	-0.172549	0.610427	1
1405	dd_Smed_v6_1151_0_1	1754.56	1636	1873.12	1.14494	0.195273	0.598725	1
1406	dd_Smed_v6_11520_0_1	113.526	121.048	106.003	0.875709	-0.191476	0.371056	1
1407	dd_Smed_v6_11521_0_1	223.368	218.934	227.801	1.0405	0.0572757	0.758905	1
1408	dd_Smed_v6_11522_0_1	151.459	155.571	147.348	0.947143	-0.0783453	0.660653	1
1409	dd_Smed_v6_11523_0_1	333.614	331.51	335.719	1.0127	0.0182033	0.994402	1
1410	dd_Smed_v6_11524_0_1	258.638	266.178	251.098	0.943346	-0.0841407	0.559516	1
1411	dd_Smed_v6_11525_0_1	332.71	313.21	352.211	1.12452	0.169308	0.493278	1
1412	dd_Smed_v6_11527_0_1	234.05	241.051	227.049	0.941911	-0.086338	0.724489	1
1413	dd_Smed_v6_11528_0_1	18.3793	16.7788	19.9797	1.19078	0.251902	0.969024	1
1414	dd_Smed_v6_11529_0_1	127.686	114.567	140.805	1.22902	0.297503	0.437643	1
1415	dd_Smed_v6_1152_1_1	11.8008	12.5325	11.0691	0.88323	-0.179139	0.860393	1
1416	dd_Smed_v6_1152_2_1	374.708	353.515	395.902	1.1199	0.163372	0.431925	1
1417	dd_Smed_v6_11530_0_1	242.879	232.164	253.594	1.0923	0.127374	0.5816	1
1418	dd_Smed_v6_11531_0_1	88.6718	88.9997	88.3439	0.992631	-0.0106701	0.951671	1
1419	dd_Smed_v6_11532_0_1	120.432	126.763	114.101	0.900111	-0.151825	0.556509	1
1420	dd_Smed_v6_11533_0_1	189.675	187.007	192.343	1.02853	0.0405886	0.790662	1
1421	dd_Smed_v6_11534_0_1	258.035	268.503	247.567	0.922025	-0.117122	0.543134	1
1422	dd_Smed_v6_11535_0_1	185.209	184.151	186.268	1.0115	0.016492	0.999917	1
1423	dd_Smed_v6_11539_0_1	391.819	409.397	374.24	0.914127	-0.129534	0.473856	1
1424	dd_Smed_v6_1153_0_1	3387.96	3590.79	3185.14	0.88703	-0.172945	0.551393	1
1425	dd_Smed_v6_11540_0_1	333.223	362.809	303.637	0.836907	-0.256861	0.50026	1
1426	dd_Smed_v6_11543_0_1	68.6838	76.4505	60.9171	0.796818	-0.327678	0.479929	1
1427	dd_Smed_v6_11544_0_1	177.918	170.184	185.652	1.09089	0.125503	0.709922	1
1428	dd_Smed_v6_11546_0_1	350.827	354.277	347.378	0.980525	-0.0283734	0.924017	1
1429	dd_Smed_v6_11547_0_1	369.337	343.421	395.254	1.15093	0.202804	0.385031	1
1430	dd_Smed_v6_1154_0_1	2368.61	2401.5	2335.72	0.972608	-0.0400691	0.876814	1
1431	dd_Smed_v6_11550_0_1	72.0241	78.8841	65.1641	0.826074	-0.275657	0.313373	1
1432	dd_Smed_v6_11552_0_1	66.83	73.9853	59.6746	0.806574	-0.310121	0.630808	1
1433	dd_Smed_v6_11553_0_1	168.818	175.151	162.486	0.927695	-0.108278	0.719892	1
1434	dd_Smed_v6_11554_0_1	110.873	109.695	112.05	1.02147	0.0306515	0.934753	1
1435	dd_Smed_v6_11557_0_1	295.163	294.573	295.754	1.00401	0.00577525	0.944572	1
1436	dd_Smed_v6_11558_0_1	125.567	125.23	125.904	1.00538	0.00773855	0.928083	1
1437	dd_Smed_v6_11559_0_1	102.373	111.837	92.909	0.830754	-0.267507	0.348474	1
1438	dd_Smed_v6_11560_0_1	357.129	367.204	347.053	0.945123	-0.0814258	0.796282	1
1439	dd_Smed_v6_11561_0_1	169.563	172.422	166.703	0.966829	-0.048667	0.955392	1
1440	dd_Smed_v6_11562_0_1	69.6373	67.9128	71.3619	1.05079	0.0714694	0.907065	1
1441	dd_Smed_v6_11564_0_1	56.0493	48.6794	63.4192	1.30279	0.381607	0.672787	1
1442	dd_Smed_v6_11565_0_1	252.43	233.965	270.896	1.15785	0.211444	0.356228	1
1443	dd_Smed_v6_11566_0_1	150.561	153.219	147.902	0.965301	-0.0509495	0.827968	1
1444	dd_Smed_v6_1156_0_1	1688.38	1789.97	1586.79	0.886485	-0.173831	0.38529	1
1445	dd_Smed_v6_11570_1_1	35.9882	35.8089	36.1675	1.01002	0.0143776	1	1
1446	dd_Smed_v6_11571_0_1	110.298	110.118	110.478	1.00327	0.00470351	0.964551	1
1447	dd_Smed_v6_11572_0_1	177.086	166.639	187.533	1.12539	0.170424	0.600652	1
1448	dd_Smed_v6_11573_0_1	161.711	160.334	163.089	1.01718	0.0245801	0.998731	1
1449	dd_Smed_v6_11574_0_1	78.6863	82.1995	75.173	0.914519	-0.128915	0.630273	1
1450	dd_Smed_v6_11575_0_1	137.753	115.997	159.509	1.37512	0.459556	0.298322	1
1451	dd_Smed_v6_11576_0_1	276.61	276.494	276.725	1.00084	0.00120939	0.997053	1
1452	dd_Smed_v6_11577_0_1	244.107	255.063	233.15	0.914089	-0.129594	0.539213	1
1453	dd_Smed_v6_11578_0_1	185.677	187.743	183.611	0.977993	-0.0321038	0.878538	1
1454	dd_Smed_v6_11579_0_1	406.247	427.423	385.072	0.900917	-0.150534	0.517017	1
1455	dd_Smed_v6_1157_0_1	4299.17	4537.58	4060.75	0.894914	-0.160178	0.438468	1
1456	dd_Smed_v6_11580_0_1	75.7587	69.0596	82.4578	1.19401	0.255813	0.400904	1
1457	dd_Smed_v6_11582_0_1	169.55	180.281	158.82	0.88096	-0.182852	0.431427	1
1458	dd_Smed_v6_11583_0_1	224.956	235.575	214.338	0.909851	-0.136298	0.631356	1
1459	dd_Smed_v6_11585_0_1	77.7898	78.5303	77.0493	0.981141	-0.0274683	0.901725	1
1460	dd_Smed_v6_11586_0_1	300.445	325.68	275.211	0.845037	-0.242914	0.254051	1
1461	dd_Smed_v6_11587_0_1	195.128	196.289	193.966	0.988165	-0.0171756	0.946264	1
1462	dd_Smed_v6_11589_0_1	53.7014	51.2154	56.1873	1.09708	0.133668	0.673814	1
1463	dd_Smed_v6_1158_0_1	3421.92	3588.86	3254.97	0.906966	-0.14088	0.433032	1
1464	dd_Smed_v6_11591_0_1	151.06	141.115	161.005	1.14094	0.190228	0.685831	1
1465	dd_Smed_v6_11592_1_10	11.2431	12.8184	9.6677	0.754204	-0.406973	0.387012	1
1466	dd_Smed_v6_11593_0_1	139.713	141.354	138.071	0.97678	-0.0338947	0.932066	1
1467	dd_Smed_v6_11594_0_1	197.214	207.531	186.897	0.900572	-0.151086	0.538235	1
1468	dd_Smed_v6_11595_0_1	136.982	140.783	133.182	0.946005	-0.0800804	0.809215	1
1469	dd_Smed_v6_11598_0_1	214.448	208.259	220.637	1.05944	0.0832967	0.761826	1
1470	dd_Smed_v6_11599_0_1	99.042	98.219	99.8651	1.01676	0.0239781	0.953125	1
1471	dd_Smed_v6_1159_0_1	2114.46	2439.05	1789.87	0.733839	-0.446465	0.0335892	1
1472	dd_Smed_v6_1159_1_1	28.4389	26.2885	30.5894	1.1636	0.218601	0.518137	1
1473	dd_Smed_v6_115_0_1	34696.9	34711	34682.7	0.999186	-0.00117419	0.987218	1
1474	dd_Smed_v6_11600_0_1	49.6314	44.107	55.1558	1.2505	0.322507	0.718313	1
1475	dd_Smed_v6_11601_0_1	251.965	271.518	232.411	0.85597	-0.224367	0.264945	1
1476	dd_Smed_v6_11602_0_1	143.893	146.713	141.072	0.96155	-0.0565665	0.862226	1
1477	dd_Smed_v6_11603_0_1	271.062	265.224	276.899	1.04402	0.0621522	0.803514	1
1478	dd_Smed_v6_11605_0_1	452.423	460.247	444.598	0.965997	-0.0499092	0.831839	1
1479	dd_Smed_v6_11607_0_1	108.467	107.77	109.163	1.01292	0.018524	0.942924	1
1480	dd_Smed_v6_11608_0_1	236.785	237.256	236.314	0.996031	-0.00573788	0.947869	1
1481	dd_Smed_v6_11609_0_1	200.331	191.748	208.914	1.08952	0.123695	0.630055	1
1482	dd_Smed_v6_11610_0_1	166.539	169.671	163.408	0.963082	-0.0542688	0.694431	1
1483	dd_Smed_v6_11611_0_1	11.8941	13.5926	10.1956	0.750089	-0.414867	0.49836	1
1484	dd_Smed_v6_11615_0_3	16.0288	18.1467	13.9108	0.766578	-0.383496	0.491446	1
1485	dd_Smed_v6_11616_0_1	272.62	223.646	321.595	1.43796	0.524025	0.0151185	1
1486	dd_Smed_v6_11618_0_1	68.5895	67.7206	69.4585	1.02566	0.0365565	0.954555	1
1487	dd_Smed_v6_11619_0_1	331.165	318.308	344.022	1.08078	0.112076	0.615055	1
1488	dd_Smed_v6_1161_0_1	1941.55	2045.67	1837.43	0.898206	-0.154882	0.448429	1
1489	dd_Smed_v6_1161_1_1	4143.21	3724.88	4561.53	1.22461	0.292323	0.17475	1
1490	dd_Smed_v6_11620_0_1	87.0899	78.6294	95.5504	1.2152	0.281192	0.313617	1
1491	dd_Smed_v6_11622_0_1	150.546	146.699	154.393	1.05244	0.0737411	0.740927	1
1492	dd_Smed_v6_11623_0_1	328.397	301.846	354.947	1.17592	0.233794	0.309675	1
1493	dd_Smed_v6_11624_0_1	107.053	95.7656	118.341	1.23573	0.305367	0.5485	1
1494	dd_Smed_v6_11625_0_1	96.8218	100.693	92.9507	0.923111	-0.115424	0.664401	1
1495	dd_Smed_v6_11626_0_1	134.58	133.517	135.643	1.01592	0.0227937	0.92239	1
1496	dd_Smed_v6_11627_0_1	180.866	167.313	194.42	1.16201	0.216628	0.3268	1
1497	dd_Smed_v6_11628_0_1	25.9236	26.3927	25.4545	0.964456	-0.0522133	1	1
1498	dd_Smed_v6_11629_0_1	77.3518	86.4214	68.2821	0.790107	-0.339881	0.395848	1
1499	dd_Smed_v6_1162_0_1	563.1	616.086	510.115	0.827993	-0.27231	0.206838	1
1500	dd_Smed_v6_11630_0_1	217.657	214.71	220.603	1.02744	0.039061	0.75844	1
1501	dd_Smed_v6_11631_0_1	85.5116	80.0593	90.9639	1.13621	0.184226	0.794107	1
1502	dd_Smed_v6_11633_0_1	167.895	182.635	153.155	0.838587	-0.253968	0.260107	1
1503	dd_Smed_v6_11634_0_1	40.5042	42.3001	38.7082	0.915085	-0.128022	0.815587	1
1504	dd_Smed_v6_11635_0_1	178.049	154.493	201.606	1.30495	0.383995	0.096077	1
1505	dd_Smed_v6_11636_0_1	102.406	123.906	80.9053	0.652954	-0.614946	0.0360059	1
1506	dd_Smed_v6_11638_0_1	363.029	305.814	420.244	1.37418	0.458571	0.250403	1
1507	dd_Smed_v6_1163_0_1	3077.66	3309.75	2845.56	0.85975	-0.218012	0.23392	1
1508	dd_Smed_v6_11640_0_1	27.0799	22.8749	31.2849	1.36765	0.451702	0.374179	1
1509	dd_Smed_v6_11641_0_1	254.055	224.668	283.441	1.2616	0.335252	0.307148	1
1510	dd_Smed_v6_11642_0_1	201.991	206.081	197.901	0.960309	-0.0584299	0.871753	1
1511	dd_Smed_v6_11644_0_1	204.171	194.723	213.618	1.09703	0.133608	0.858351	1
1512	dd_Smed_v6_11645_0_1	55.7856	61.4615	50.1097	0.815302	-0.294594	0.372377	1
1513	dd_Smed_v6_11646_0_1	174.522	150.222	198.822	1.32352	0.40438	0.111992	1
1514	dd_Smed_v6_11647_0_1	307.326	264.692	349.961	1.32214	0.402879	0.470994	1
1515	dd_Smed_v6_11649_0_1	42.0239	41.4082	42.6397	1.02974	0.0422833	0.953974	1
1516	dd_Smed_v6_1164_0_1	681.321	683.264	679.378	0.994314	-0.00822728	0.899695	1
12876	dd_Smed_v6_570_0_1	126.772	211.284	42.2595	0.200012	-2.32184	2.61152e-09	2.36617e-06
1518	dd_Smed_v6_11651_0_1	331.88	322.207	341.553	1.06004	0.08412	0.753787	1
1519	dd_Smed_v6_11652_0_1	169.111	166.904	171.318	1.02645	0.0376612	0.80385	1
1520	dd_Smed_v6_11653_0_1	290.921	283.114	298.728	1.05515	0.0774494	0.699826	1
1521	dd_Smed_v6_11654_0_1	28.6731	24.0799	33.2663	1.38149	0.46623	0.241122	1
1522	dd_Smed_v6_11655_0_1	498.463	514.612	482.314	0.937238	-0.093512	0.7204	1
1523	dd_Smed_v6_11656_0_1	42.1383	39.9836	44.293	1.10778	0.147671	0.689086	1
1524	dd_Smed_v6_11657_0_1	285.994	280.225	291.762	1.04117	0.0582053	0.883042	1
1525	dd_Smed_v6_1165_0_1	6001.55	6368.63	5634.48	0.884724	-0.176701	0.307006	1
1526	dd_Smed_v6_11660_0_1	322.029	355.943	288.115	0.809442	-0.305	0.113524	1
1527	dd_Smed_v6_11663_0_1	356.226	372.341	340.111	0.913438	-0.130622	0.574757	1
1528	dd_Smed_v6_11664_0_1	116.197	103.597	128.797	1.24325	0.314118	0.376021	1
1529	dd_Smed_v6_11668_0_1	78.6785	76.813	80.544	1.04857	0.0684266	0.889105	1
1530	dd_Smed_v6_11669_0_1	628.565	645.934	611.196	0.94622	-0.0797523	0.668614	1
1531	dd_Smed_v6_1166_0_1	1915.03	1850.64	1979.43	1.06959	0.0970634	0.693309	1
1532	dd_Smed_v6_11671_0_1	12.1008	11.7482	12.4534	1.06003	0.0841005	0.977632	1
1533	dd_Smed_v6_11672_0_1	137.419	122.787	152.051	1.23833	0.308394	0.285988	1
1534	dd_Smed_v6_11673_0_1	407.946	393.163	422.729	1.0752	0.104604	0.590484	1
1535	dd_Smed_v6_11674_0_1	255.548	218.78	292.316	1.33612	0.418046	0.055188	1
1536	dd_Smed_v6_11675_0_2	74.3667	66.291	82.4425	1.24365	0.314577	0.471174	1
1537	dd_Smed_v6_11676_0_1	20.0906	22.5668	17.6145	0.780547	-0.357443	0.475219	1
1538	dd_Smed_v6_11678_0_1	241.879	217.892	265.867	1.22018	0.287092	0.490771	1
1539	dd_Smed_v6_11679_0_1	238.232	235.267	241.197	1.02521	0.035915	0.899717	1
1540	dd_Smed_v6_1167_0_1	4453.51	4752.44	4154.59	0.874202	-0.193962	0.301224	1
1541	dd_Smed_v6_11680_0_1	176.386	153.1	199.672	1.3042	0.38316	0.0993554	1
1542	dd_Smed_v6_11681_0_1	211.072	193.22	228.923	1.18478	0.244616	0.276096	1
1543	dd_Smed_v6_11682_0_1	228.836	224.998	232.674	1.03412	0.0483981	0.849197	1
1544	dd_Smed_v6_11683_0_1	387.255	404.221	370.289	0.916055	-0.126494	0.693288	1
1545	dd_Smed_v6_11684_0_1	76.3884	67.8665	84.9102	1.25113	0.323237	0.588381	1
1546	dd_Smed_v6_11685_0_1	54.2927	48.9341	59.6512	1.21901	0.285713	0.586088	1
1547	dd_Smed_v6_11686_0_1	300.731	304.909	296.554	0.972598	-0.0400843	0.705543	1
1548	dd_Smed_v6_11688_0_1	130.554	147.276	113.833	0.772921	-0.371607	0.352897	1
1549	dd_Smed_v6_11689_0_1	228.524	221.413	235.635	1.06424	0.0898177	0.61364	1
1550	dd_Smed_v6_1168_0_1	2832.61	3050.21	2615.02	0.857325	-0.222085	0.300916	1
1551	dd_Smed_v6_11691_0_1	60.9165	64.5104	57.3226	0.888579	-0.170428	0.78365	1
1552	dd_Smed_v6_11692_0_1	262.018	265.002	259.035	0.977484	-0.0328547	0.805911	1
1553	dd_Smed_v6_11693_0_1	458.309	446.127	470.492	1.05462	0.0767178	0.701658	1
1554	dd_Smed_v6_11695_0_1	248.238	268.565	227.91	0.848621	-0.236808	0.357129	1
1555	dd_Smed_v6_11696_0_1	238.721	232.897	244.545	1.05001	0.0704091	0.693895	1
1556	dd_Smed_v6_11697_0_1	269.968	244.212	295.724	1.21093	0.276118	0.235707	1
1557	dd_Smed_v6_11699_0_1	95.5405	93.195	97.886	1.05034	0.0708504	0.834699	1
1558	dd_Smed_v6_1169_0_1	2190.18	2071.2	2309.16	1.11489	0.1569	0.597991	1
1559	dd_Smed_v6_116_0_1	10055.6	10514.7	9596.55	0.912675	-0.131827	0.457432	1
1560	dd_Smed_v6_11700_0_1	252.27	261.092	243.448	0.932425	-0.10094	0.683898	1
1561	dd_Smed_v6_11702_0_1	414.33	434.665	393.994	0.906433	-0.141728	0.513456	1
1562	dd_Smed_v6_11704_0_1	88.6485	96.5842	80.7127	0.835672	-0.258992	0.292617	1
1563	dd_Smed_v6_11705_0_1	86.2468	82.5348	89.9588	1.08995	0.124262	0.62883	1
1564	dd_Smed_v6_11706_0_1	94.245	105.655	82.8346	0.784007	-0.351061	0.159298	1
1565	dd_Smed_v6_11707_0_1	231.053	244.433	217.673	0.890521	-0.167278	0.360993	1
1566	dd_Smed_v6_11708_0_1	213.791	197.273	230.31	1.16747	0.223385	0.397278	1
1567	dd_Smed_v6_1170_0_1	7543.16	7125.54	7960.79	1.11722	0.159913	0.340035	1
1568	dd_Smed_v6_11710_0_1	325.087	336.142	314.033	0.934228	-0.0981538	0.727283	1
1569	dd_Smed_v6_11711_0_1	241.781	240.586	242.977	1.00994	0.0142694	0.947684	1
1570	dd_Smed_v6_11714_0_1	217.797	215.219	220.375	1.02395	0.0341513	0.928027	1
1571	dd_Smed_v6_11715_0_1	168.475	176.937	160.013	0.904347	-0.145052	0.524841	1
1572	dd_Smed_v6_11717_0_1	229.699	210.835	248.564	1.17895	0.237504	0.286226	1
1573	dd_Smed_v6_11718_0_1	280.593	245.946	315.24	1.28174	0.358108	0.0937005	1
1574	dd_Smed_v6_11719_0_1	258.472	256.366	260.579	1.01644	0.0235188	0.966615	1
1575	dd_Smed_v6_1171_0_1	4537.21	5072.88	4001.54	0.788809	-0.342251	0.0519208	1
1576	dd_Smed_v6_11720_0_1	187.265	191.117	183.412	0.959685	-0.0593667	0.807431	1
1577	dd_Smed_v6_11721_0_1	74.3005	61.2043	87.3968	1.42795	0.513947	0.379617	1
1578	dd_Smed_v6_11722_0_1	21.8348	21.1406	22.529	1.06568	0.0917678	0.914246	1
1579	dd_Smed_v6_11723_0_1	28.8368	31.5011	26.1726	0.830846	-0.267347	0.452715	1
1580	dd_Smed_v6_11724_0_1	327.703	307.151	348.255	1.13382	0.181193	0.443209	1
1581	dd_Smed_v6_11725_0_1	403.129	411.245	395.013	0.96053	-0.058098	0.860416	1
1582	dd_Smed_v6_11728_0_1	411.681	392.096	431.266	1.0999	0.137373	0.43695	1
1583	dd_Smed_v6_11729_0_1	216.887	223.104	210.67	0.944266	-0.0827354	0.748318	1
1584	dd_Smed_v6_1172_0_1	2146.24	2267.48	2025.01	0.893066	-0.163161	0.39611	1
1585	dd_Smed_v6_11730_0_1	532.253	548.631	515.875	0.940295	-0.0888142	0.598078	1
1586	dd_Smed_v6_11731_0_1	221.927	225.641	218.212	0.967079	-0.0482949	0.834746	1
1587	dd_Smed_v6_11734_0_1	140.816	145.426	136.205	0.936595	-0.0945035	0.914535	1
1588	dd_Smed_v6_11735_0_1	183.096	187.86	178.332	0.949284	-0.0750883	0.770319	1
1589	dd_Smed_v6_11736_0_1	225.555	229.806	221.303	0.963002	-0.0543889	0.76099	1
1590	dd_Smed_v6_11737_0_1	104.089	109.362	98.8156	0.903566	-0.146299	0.498413	1
1591	dd_Smed_v6_11738_0_2	173.377	145.284	201.469	1.38673	0.471685	0.519358	1
1592	dd_Smed_v6_11739_0_1	183.995	167.005	200.985	1.20347	0.267196	0.235415	1
1593	dd_Smed_v6_1173_0_1	1072.64	1167.57	977.709	0.837385	-0.256037	0.173286	1
1594	dd_Smed_v6_11741_0_1	220.259	230.918	209.601	0.907688	-0.139731	0.480976	1
1595	dd_Smed_v6_11742_0_1	316.756	286.632	346.88	1.21019	0.275237	0.300468	1
1596	dd_Smed_v6_11743_0_1	279.461	276.399	282.523	1.02216	0.0316164	0.929744	1
1597	dd_Smed_v6_11744_0_1	383.381	394.281	372.481	0.94471	-0.0820563	0.680917	1
1598	dd_Smed_v6_11746_0_1	279.269	268.84	289.698	1.07758	0.107801	0.58111	1
1599	dd_Smed_v6_11747_0_1	126.786	118.406	135.167	1.14156	0.191004	0.366827	1
1600	dd_Smed_v6_11748_0_1	169.774	156.598	182.95	1.16827	0.224377	0.413813	1
1601	dd_Smed_v6_1174_0_1	5001.19	5077.26	4925.12	0.970034	-0.0438932	0.848887	1
1602	dd_Smed_v6_11751_0_1	56.5072	61.2883	51.7262	0.84398	-0.244719	0.367217	1
1603	dd_Smed_v6_11753_0_1	137.013	146.785	127.241	0.866855	-0.206138	0.447643	1
1604	dd_Smed_v6_11754_0_1	210.557	223.032	198.081	0.888127	-0.171162	0.502869	1
1605	dd_Smed_v6_11755_0_1	232.617	237.729	227.505	0.956992	-0.0634214	0.786291	1
1606	dd_Smed_v6_11756_0_1	340.966	323.951	357.982	1.10505	0.14411	0.51251	1
1607	dd_Smed_v6_11757_0_1	172.478	158.749	186.208	1.17297	0.230171	0.305941	1
1608	dd_Smed_v6_11759_0_1	121.479	121.451	121.507	1.00046	0.000667128	0.992921	1
1609	dd_Smed_v6_1175_0_1	359.303	309.63	408.975	1.32085	0.401468	0.0383963	1
1610	dd_Smed_v6_11761_0_1	164.516	168.593	160.439	0.951634	-0.0715216	0.667827	1
1611	dd_Smed_v6_11762_0_1	77.7068	76.8687	78.5448	1.0218	0.0311193	0.940974	1
1612	dd_Smed_v6_11763_0_1	266.889	259.919	273.858	1.05363	0.0753687	0.802353	1
1613	dd_Smed_v6_11764_0_1	243.024	236.178	249.87	1.05797	0.0813025	0.810386	1
1614	dd_Smed_v6_11765_0_1	237.488	273.597	201.379	0.73604	-0.442144	0.0288016	1
1615	dd_Smed_v6_11766_0_1	104.944	111.561	98.3274	0.881379	-0.182165	0.56064	1
1616	dd_Smed_v6_11767_0_1	353.812	360.159	347.465	0.964753	-0.0517683	0.837533	1
1617	dd_Smed_v6_11768_0_1	59.9528	49.4969	70.4086	1.42248	0.508412	0.358311	1
1618	dd_Smed_v6_11769_0_1	201.588	188.501	214.676	1.13886	0.187591	0.515201	1
1619	dd_Smed_v6_1176_0_1	2949.15	2983.58	2914.72	0.976919	-0.0336886	0.921198	1
1620	dd_Smed_v6_11770_0_1	215.685	201.785	229.585	1.13777	0.18621	0.35259	1
1621	dd_Smed_v6_11772_0_1	170.381	158.705	182.058	1.14715	0.19805	0.355448	1
1622	dd_Smed_v6_11774_0_1	58.0524	57.6514	58.4533	1.01391	0.0199282	1	1
1623	dd_Smed_v6_11775_0_1	298.041	292.997	303.086	1.03443	0.0488429	0.814222	1
1624	dd_Smed_v6_11778_0_1	265.969	282.102	249.836	0.885624	-0.175233	0.427414	1
1625	dd_Smed_v6_1177_0_1	1619.3	1532.53	1706.06	1.11323	0.154753	0.459671	1
1626	dd_Smed_v6_11780_0_1	74.0842	77.1806	70.9878	0.919762	-0.120667	0.598097	1
1627	dd_Smed_v6_11785_0_1	63.1583	53.8425	72.4741	1.34604	0.428722	0.344871	1
1628	dd_Smed_v6_11786_0_1	186.748	184.756	188.739	1.02156	0.0307708	0.871125	1
1629	dd_Smed_v6_11787_0_1	210.479	190.73	230.229	1.20709	0.271537	0.242553	1
1630	dd_Smed_v6_11788_0_4	26.4308	23.478	29.3836	1.25154	0.323699	0.490441	1
1631	dd_Smed_v6_1178_0_1	692.915	754.011	631.819	0.837944	-0.255075	0.221616	1
1632	dd_Smed_v6_11790_0_1	115.771	90.5386	141.003	1.55738	0.639119	0.321147	1
1633	dd_Smed_v6_11791_0_1	34.3013	33.4421	35.1606	1.05139	0.0722939	0.90412	1
1634	dd_Smed_v6_11792_0_1	74.4437	77.1575	71.7298	0.929654	-0.105234	0.776844	1
1635	dd_Smed_v6_11793_0_1	117.875	98.891	136.858	1.38393	0.468772	0.0515473	1
1636	dd_Smed_v6_11794_1_1	268.451	234.539	302.362	1.28917	0.366446	0.0675038	1
1637	dd_Smed_v6_11797_0_1	175.204	171.895	178.513	1.0385	0.0545053	0.890815	1
1638	dd_Smed_v6_11799_0_1	337.918	402.413	273.423	0.679459	-0.557541	0.00805844	0.912671
1639	dd_Smed_v6_1179_0_1	11790.5	11888.6	11692.4	0.983501	-0.0240009	0.997513	1
1640	dd_Smed_v6_117_0_1	17566.3	18324	16808.6	0.917297	-0.124539	0.546479	1
1641	dd_Smed_v6_11800_0_1	185.042	178.138	191.947	1.07752	0.107715	0.595295	1
1642	dd_Smed_v6_11801_0_1	89.3559	84.4805	94.2314	1.11542	0.15759	0.672592	1
1643	dd_Smed_v6_11802_0_1	42.6252	31.5321	53.7183	1.7036	0.76859	0.157956	1
1644	dd_Smed_v6_11804_0_1	268.372	267.994	268.75	1.00282	0.00406746	0.9204	1
1645	dd_Smed_v6_11805_0_1	363.08	351.129	375.03	1.06807	0.0950028	0.697691	1
1646	dd_Smed_v6_11807_0_1	250.857	255.037	246.677	0.967222	-0.0480808	0.658524	1
1647	dd_Smed_v6_11809_0_1	227.794	218.021	237.568	1.08966	0.123876	0.74933	1
1648	dd_Smed_v6_1180_0_1	3922.88	4044.94	3800.82	0.939648	-0.0898082	0.655133	1
1649	dd_Smed_v6_11811_0_1	253.596	279.184	228.009	0.816698	-0.292126	0.398298	1
1650	dd_Smed_v6_11813_0_1	195.035	210.457	179.613	0.853441	-0.228637	0.362343	1
1651	dd_Smed_v6_11814_0_1	378.65	360.721	396.579	1.09941	0.136725	0.439801	1
1652	dd_Smed_v6_11815_0_1	32.5139	29.3207	35.7071	1.21781	0.284291	0.835913	1
1653	dd_Smed_v6_11817_0_1	237.397	232.356	242.437	1.04339	0.0612768	0.846064	1
1654	dd_Smed_v6_11818_0_1	187.368	185.113	189.624	1.02437	0.0347356	1	1
1655	dd_Smed_v6_1181_0_1	6845.99	6559.86	7132.12	1.08724	0.120666	0.551207	1
1656	dd_Smed_v6_11820_0_1	26.0395	27.181	24.8979	0.916005	-0.126573	0.734499	1
1657	dd_Smed_v6_11821_0_1	137.706	142.803	132.61	0.928623	-0.106835	0.604166	1
1658	dd_Smed_v6_11822_0_1	46.2345	47.3062	45.1628	0.954691	-0.0668944	0.715692	1
2218	dd_Smed_v6_12467_0_1	385.346	641.282	129.41	0.201799	-2.30901	5.30823e-10	5.71132e-07
1660	dd_Smed_v6_11824_0_1	373.241	361.929	384.554	1.06251	0.0874789	0.704358	1
1661	dd_Smed_v6_11826_0_1	366.396	360.891	371.901	1.03051	0.0433583	0.847072	1
1662	dd_Smed_v6_11827_0_1	206.436	194.538	218.335	1.12233	0.166493	0.536812	1
1663	dd_Smed_v6_11828_0_1	332.165	345.51	318.821	0.922754	-0.115981	0.685479	1
1664	dd_Smed_v6_11829_0_1	45.354	39.6371	51.0708	1.28846	0.365649	0.810418	1
1665	dd_Smed_v6_1182_0_1	967.354	787.153	1147.56	1.45786	0.543848	0.317637	1
1666	dd_Smed_v6_11830_0_1	160.275	151.308	169.243	1.11853	0.161607	0.46461	1
1667	dd_Smed_v6_11831_0_1	219.38	215.407	223.354	1.03689	0.0522688	0.823502	1
1668	dd_Smed_v6_11832_0_1	263.891	264.227	263.555	0.997456	-0.00367556	0.957644	1
1669	dd_Smed_v6_11833_0_1	149.39	149.246	149.534	1.00193	0.00278671	0.885823	1
1670	dd_Smed_v6_11834_0_1	163.912	151.305	176.519	1.16664	0.222361	0.514178	1
1671	dd_Smed_v6_11835_0_1	398.727	366.822	430.631	1.17395	0.231372	0.263673	1
1672	dd_Smed_v6_11836_0_1	54.0605	52.3372	55.7838	1.06585	0.0920102	0.971121	1
1673	dd_Smed_v6_11837_0_1	261.261	278.628	243.893	0.875337	-0.19209	0.394329	1
1674	dd_Smed_v6_11838_0_1	178.801	182.767	174.835	0.956602	-0.0640099	0.792519	1
1675	dd_Smed_v6_11839_0_1	145.135	141.15	149.121	1.05648	0.0792626	0.679664	1
1676	dd_Smed_v6_1183_0_1	714.373	625.457	803.29	1.28432	0.361009	0.510192	1
1677	dd_Smed_v6_11840_0_1	370.503	415.505	325.501	0.783386	-0.352205	0.0978665	1
1678	dd_Smed_v6_11841_0_1	75.9574	67.3318	84.583	1.25621	0.32908	0.368555	1
1679	dd_Smed_v6_11843_0_1	240.138	235.701	244.575	1.03765	0.0533223	0.81658	1
1680	dd_Smed_v6_11845_0_1	291.182	316.14	266.225	0.842109	-0.24792	0.184231	1
1681	dd_Smed_v6_11846_0_1	14.8186	11.9911	17.6461	1.47161	0.557392	0.25764	1
1682	dd_Smed_v6_11847_0_1	217.404	195.874	238.934	1.21984	0.286692	0.393708	1
1683	dd_Smed_v6_11848_0_1	97.2974	89.726	104.869	1.16877	0.224989	0.547842	1
1684	dd_Smed_v6_1184_0_1	3771.33	4008.1	3534.56	0.881855	-0.181386	0.447337	1
1685	dd_Smed_v6_11850_0_1	37.6562	38.0192	37.2932	0.980902	-0.0278185	0.91406	1
1686	dd_Smed_v6_11851_0_1	209.162	194.402	223.922	1.15185	0.203949	0.337499	1
1687	dd_Smed_v6_11852_0_1	99.5376	111.336	87.7395	0.788063	-0.343618	0.125384	1
1688	dd_Smed_v6_11853_0_1	199.904	187.404	212.405	1.1334	0.180663	0.390693	1
1689	dd_Smed_v6_11855_0_1	168.59	175.118	162.062	0.925445	-0.111781	0.636191	1
1690	dd_Smed_v6_11856_0_1	44.6963	39.6571	49.7356	1.25414	0.3267	0.738415	1
1691	dd_Smed_v6_11857_0_1	285.381	269.127	301.636	1.1208	0.164523	0.450553	1
1692	dd_Smed_v6_11858_0_1	46.5059	44.4807	48.531	1.09106	0.125727	0.734567	1
1693	dd_Smed_v6_11859_0_1	36.3131	32.4225	40.2037	1.24	0.310335	0.416919	1
1694	dd_Smed_v6_1185_0_1	1638.74	1682.17	1595.3	0.94836	-0.0764938	0.713845	1
1695	dd_Smed_v6_11860_0_1	284.903	309.751	260.056	0.839566	-0.252284	0.261001	1
1696	dd_Smed_v6_11861_0_1	44.4449	35.9924	52.8975	1.46968	0.555506	0.343704	1
1697	dd_Smed_v6_11862_0_1	215.578	229.887	201.27	0.87552	-0.191788	0.440587	1
1698	dd_Smed_v6_11863_0_1	70.4796	79.6728	61.2863	0.769225	-0.378522	0.170795	1
1699	dd_Smed_v6_11866_0_1	42.0571	47.9019	36.2123	0.755966	-0.403606	0.299543	1
1700	dd_Smed_v6_11867_0_1	223.617	196.718	250.516	1.27348	0.348775	0.681325	1
1701	dd_Smed_v6_11868_0_1	110.158	112.679	107.637	0.955256	-0.0660414	0.921835	1
1702	dd_Smed_v6_11869_0_1	19.604	19.8508	19.3573	0.975142	-0.0363156	1	1
1703	dd_Smed_v6_1186_0_1	1359	1420.46	1297.53	0.91346	-0.130586	0.488216	1
1704	dd_Smed_v6_11870_0_1	10.2405	9.04357	11.4374	1.2647	0.338796	0.783308	1
1705	dd_Smed_v6_11871_0_1	28.0377	21.911	34.1644	1.55924	0.640839	0.366132	1
1706	dd_Smed_v6_11872_0_1	167.196	168.95	165.441	0.979231	-0.0302785	0.960335	1
1707	dd_Smed_v6_11873_0_1	144.295	148.648	139.941	0.941426	-0.0870804	0.832758	1
1708	dd_Smed_v6_11874_0_1	251.023	224.906	277.141	1.23225	0.301295	0.14279	1
1709	dd_Smed_v6_11876_0_1	407.112	415.659	398.566	0.958877	-0.0605822	0.880363	1
1710	dd_Smed_v6_11877_0_1	119.951	96.9899	142.912	1.47348	0.559223	0.167112	1
1711	dd_Smed_v6_11879_0_1	328.506	352.416	304.597	0.86431	-0.210379	0.346368	1
1712	dd_Smed_v6_1187_0_1	3693.58	3304.55	4082.62	1.23545	0.30504	0.140873	1
1713	dd_Smed_v6_11881_0_1	10.833	11.2407	10.4254	0.927469	-0.108628	0.855598	1
1714	dd_Smed_v6_11882_0_1	385.555	396.307	374.803	0.94574	-0.0804848	0.654767	1
1715	dd_Smed_v6_11883_0_1	163.562	178.558	148.566	0.832032	-0.26529	0.336763	1
1716	dd_Smed_v6_11884_0_1	219.669	231.604	207.735	0.896941	-0.156916	0.516859	1
1717	dd_Smed_v6_11885_0_1	212.465	230.851	194.08	0.840716	-0.25031	0.258366	1
1718	dd_Smed_v6_11886_0_1	249.634	238.91	260.359	1.08978	0.12403	0.532402	1
1719	dd_Smed_v6_11887_0_1	349.464	358.572	340.355	0.949195	-0.075224	0.698187	1
1720	dd_Smed_v6_11888_0_1	133.381	133.092	133.671	1.00435	0.00626392	0.867439	1
1721	dd_Smed_v6_1188_0_1	188.266	220.837	155.696	0.705026	-0.504251	0.0297013	1
1722	dd_Smed_v6_11890_0_1	152.512	152.475	152.549	1.00048	0.000698081	0.866194	1
1723	dd_Smed_v6_11891_0_1	185.841	174.933	196.749	1.12472	0.169561	0.499745	1
1724	dd_Smed_v6_11892_0_1	191.281	172.031	210.532	1.2238	0.291372	0.17441	1
1725	dd_Smed_v6_11893_0_1	115.667	122.358	108.976	0.890626	-0.167108	0.551759	1
1726	dd_Smed_v6_11894_0_1	250.727	268.394	233.059	0.868343	-0.203662	0.39817	1
1727	dd_Smed_v6_11895_0_1	271.8	269.795	273.805	1.01486	0.0212832	0.862343	1
1728	dd_Smed_v6_11896_0_1	37.2204	33.7174	40.7234	1.20779	0.272365	0.736714	1
1729	dd_Smed_v6_11898_0_1	70.36	60.8276	79.8924	1.31342	0.39333	0.158188	1
1730	dd_Smed_v6_11899_0_1	6.55125	5.69711	7.40539	1.29985	0.378345	0.6133	1
1731	dd_Smed_v6_1189_0_1	8965.93	9692.32	8239.54	0.85011	-0.234278	0.231747	1
1732	dd_Smed_v6_11900_0_1	79.8821	80.0919	79.6724	0.994762	-0.00757725	0.867369	1
1733	dd_Smed_v6_11901_0_1	116.299	109.502	123.096	1.12414	0.168823	0.636981	1
1734	dd_Smed_v6_11902_0_1	28.3299	33.9819	22.678	0.667354	-0.583475	0.10385	1
1735	dd_Smed_v6_11903_0_1	176.659	149.761	203.556	1.35921	0.442767	0.209059	1
1736	dd_Smed_v6_11904_0_1	195.51	183.149	207.872	1.13499	0.182679	0.484155	1
1737	dd_Smed_v6_11905_0_1	479.023	487.672	470.375	0.964533	-0.0520979	0.835681	1
1738	dd_Smed_v6_11906_0_1	356.655	388.547	324.762	0.835837	-0.258706	0.210789	1
1739	dd_Smed_v6_11908_0_1	67.8487	73.2296	62.4677	0.853039	-0.229317	0.344752	1
1740	dd_Smed_v6_11909_0_1	162.365	168.595	156.135	0.926095	-0.110768	0.667242	1
1741	dd_Smed_v6_1190_0_1	2728.09	2639.34	2816.83	1.06725	0.0938964	0.730324	1
1742	dd_Smed_v6_11910_0_1	154.011	153.61	154.412	1.00522	0.00751356	0.994045	1
1743	dd_Smed_v6_11911_0_1	26.9179	29.1672	24.6685	0.845765	-0.241672	0.703201	1
1744	dd_Smed_v6_11912_0_1	398.361	407.466	389.255	0.955308	-0.0659622	0.804314	1
1745	dd_Smed_v6_11913_0_1	13.985	13.6245	14.3455	1.05292	0.074396	1	1
1746	dd_Smed_v6_11914_0_1	95.4543	90.1424	100.766	1.11786	0.160735	0.700592	1
1747	dd_Smed_v6_11915_0_1	73.5613	73.9396	73.1831	0.989769	-0.0148367	0.900812	1
1748	dd_Smed_v6_11917_0_1	259.044	258.912	259.175	1.00101	0.00146226	0.950878	1
1749	dd_Smed_v6_11918_0_1	114.404	111.123	117.685	1.05905	0.082768	0.746916	1
1750	dd_Smed_v6_1191_0_1	391.595	324.933	458.256	1.41031	0.496011	0.523739	1
1751	dd_Smed_v6_11920_0_1	194.643	171.025	218.261	1.2762	0.351851	0.395332	1
1752	dd_Smed_v6_11921_0_1	124.086	117.798	130.373	1.10675	0.146323	0.596651	1
1753	dd_Smed_v6_11922_0_1	250.019	250.149	249.889	0.998961	-0.00149937	0.947507	1
1754	dd_Smed_v6_11923_0_1	229.44	195.901	262.98	1.34241	0.424826	0.207068	1
1755	dd_Smed_v6_11924_0_1	48.0668	39.648	56.4857	1.42468	0.510637	0.101226	1
1756	dd_Smed_v6_11926_0_1	192.363	161.753	222.973	1.37848	0.463081	0.174826	1
1757	dd_Smed_v6_11926_1_1	110.828	97.7402	123.915	1.2678	0.342326	0.233483	1
1758	dd_Smed_v6_11927_0_1	263.799	265.492	262.106	0.987246	-0.0185184	0.981126	1
1759	dd_Smed_v6_11928_0_1	177.081	162.321	191.841	1.18186	0.241064	0.273643	1
1760	dd_Smed_v6_1192_0_1	2713.11	2710.4	2715.82	1.002	0.00288326	0.987556	1
1761	dd_Smed_v6_11930_0_1	177.612	157.696	197.528	1.25258	0.324907	0.274868	1
1762	dd_Smed_v6_11931_0_1	235.012	226.577	243.447	1.07446	0.103608	0.675567	1
1763	dd_Smed_v6_11933_0_1	47.1701	45.1636	49.1766	1.08885	0.122812	0.996017	1
1764	dd_Smed_v6_11934_0_1	320.654	274.139	367.17	1.33936	0.42154	0.22546	1
1765	dd_Smed_v6_11935_0_1	225.813	220.773	230.854	1.04566	0.0644131	0.875472	1
1766	dd_Smed_v6_11936_0_1	302.151	289.751	314.55	1.08559	0.118475	0.931449	1
1767	dd_Smed_v6_11937_0_1	212.31	179.824	244.795	1.3613	0.444986	0.0585889	1
1768	dd_Smed_v6_11939_0_1	250.045	257.264	242.827	0.943885	-0.083317	0.794109	1
1769	dd_Smed_v6_1193_0_1	1051.85	1128.77	974.93	0.863714	-0.211375	0.344548	1
1770	dd_Smed_v6_11941_0_1	158.051	161.568	154.534	0.956464	-0.0642172	0.848092	1
1771	dd_Smed_v6_11942_0_1	132.751	123.448	142.055	1.15073	0.202553	0.48084	1
1772	dd_Smed_v6_11943_0_1	140.517	146.863	134.17	0.913575	-0.130404	0.755846	1
1773	dd_Smed_v6_11944_0_1	283.577	269.186	297.969	1.10692	0.146557	0.460793	1
1774	dd_Smed_v6_11945_0_10	108.072	116.324	99.8191	0.858112	-0.220762	0.241659	1
1775	dd_Smed_v6_11946_0_1	56.5121	58.6598	54.3644	0.926775	-0.109709	0.830218	1
1776	dd_Smed_v6_11947_0_1	483.825	458.308	509.341	1.11135	0.152315	0.410739	1
1777	dd_Smed_v6_11948_0_1	486.828	466.027	507.629	1.08927	0.123361	0.50611	1
1778	dd_Smed_v6_1194_0_1	6207.24	6353.43	6061.05	0.95398	-0.0679686	0.739057	1
1779	dd_Smed_v6_11951_0_1	180.369	197.763	162.974	0.824085	-0.279134	0.233466	1
1780	dd_Smed_v6_11953_0_1	97.5251	100.014	95.0366	0.950236	-0.0736418	0.778131	1
1781	dd_Smed_v6_11954_0_1	47.8312	47.7302	47.9321	1.00423	0.00608876	0.950598	1
1782	dd_Smed_v6_11955_0_1	205.881	200.64	211.122	1.05224	0.0734641	0.777553	1
1783	dd_Smed_v6_11956_0_1	52.7756	49.836	55.7152	1.11797	0.160881	0.944534	1
1784	dd_Smed_v6_11957_0_1	425.254	432.52	417.988	0.966402	-0.0493051	0.656505	1
1785	dd_Smed_v6_11958_0_1	231.618	206.54	256.695	1.24283	0.313631	0.420711	1
1786	dd_Smed_v6_11959_0_1	109.51	88.1386	130.88	1.48494	0.570403	0.247214	1
1787	dd_Smed_v6_1195_0_1	2518.72	2594.6	2442.85	0.94151	-0.0869513	0.634843	1
1788	dd_Smed_v6_11960_0_1	74.5988	75.4737	73.7238	0.976814	-0.0338442	0.999117	1
1789	dd_Smed_v6_11961_0_1	62.4282	61.9503	62.9061	1.01543	0.0220882	0.924945	1
1790	dd_Smed_v6_11962_0_1	278.339	297.993	258.685	0.868089	-0.204086	0.408215	1
1791	dd_Smed_v6_11963_0_1	198.7	213.527	183.874	0.861126	-0.215703	0.388975	1
1792	dd_Smed_v6_11964_0_1	98.4135	97.5278	99.2993	1.01816	0.0259707	1	1
1793	dd_Smed_v6_11967_0_1	94.8094	104.701	84.9181	0.811055	-0.302129	0.294306	1
1794	dd_Smed_v6_11968_0_1	74.8254	72.8434	76.8075	1.05442	0.0764487	0.842128	1
1795	dd_Smed_v6_11969_0_1	330.432	330.815	330.049	0.997685	-0.00334425	0.963437	1
4844	dd_Smed_v6_16227_0_1	129.03	213.156	44.9044	0.210665	-2.24698	1.82806e-09	1.74834e-06
1797	dd_Smed_v6_11970_0_1	87.2031	73.7138	100.692	1.36599	0.44995	0.106596	1
1798	dd_Smed_v6_11972_0_1	378.73	368.265	389.194	1.05683	0.0797452	0.806833	1
1799	dd_Smed_v6_11973_0_1	172.758	170.619	174.897	1.02508	0.0357298	0.956276	1
1800	dd_Smed_v6_11974_0_1	101.234	93.7241	108.744	1.16026	0.214444	0.418099	1
1801	dd_Smed_v6_11975_0_1	330.753	327.04	334.465	1.02271	0.0323922	0.880921	1
1802	dd_Smed_v6_11976_0_1	197.772	174.479	221.065	1.267	0.341413	0.141365	1
1803	dd_Smed_v6_1197_0_1	6114.83	6509.32	5720.34	0.878792	-0.186406	0.483977	1
1804	dd_Smed_v6_11981_0_1	443.174	447.923	438.424	0.978793	-0.030924	0.963963	1
1805	dd_Smed_v6_11982_0_1	143.219	139.098	147.341	1.05926	0.0830578	0.790447	1
1806	dd_Smed_v6_11983_0_1	103.926	93.5852	114.267	1.221	0.28806	0.782182	1
1807	dd_Smed_v6_11984_0_1	206.611	191.345	221.877	1.15957	0.213586	0.352408	1
1808	dd_Smed_v6_11987_0_1	468.705	500.505	436.905	0.872929	-0.196064	0.353185	1
1809	dd_Smed_v6_11988_0_1	50.81	47.3592	54.2608	1.14573	0.196265	0.592109	1
1810	dd_Smed_v6_1198_0_1	2512.02	2641.33	2382.71	0.902089	-0.148659	0.515384	1
1811	dd_Smed_v6_11990_0_1	148.832	142.26	155.405	1.0924	0.127505	0.625809	1
1812	dd_Smed_v6_11991_0_1	88.1042	78.5891	97.6192	1.24215	0.312834	0.465041	1
1813	dd_Smed_v6_11992_0_1	205.942	217.891	193.992	0.890314	-0.167615	0.504917	1
1814	dd_Smed_v6_11993_0_1	337.755	352.078	323.432	0.918639	-0.122431	0.535927	1
1815	dd_Smed_v6_11994_0_1	195.051	187.823	202.279	1.07697	0.106978	0.573374	1
1816	dd_Smed_v6_11995_0_1	322.068	326.017	318.12	0.97578	-0.0353718	0.961758	1
1817	dd_Smed_v6_11997_0_1	127.646	136.731	118.561	0.867112	-0.20571	0.33653	1
1818	dd_Smed_v6_11998_0_1	30.1736	23.1607	37.1865	1.60558	0.683097	0.177229	1
1819	dd_Smed_v6_1199_0_1	4569.47	4920.34	4218.6	0.857379	-0.221995	0.272219	1
1820	dd_Smed_v6_11_0_1	59626.2	68797.7	50454.7	0.733378	-0.447371	0.0466604	1
1821	dd_Smed_v6_12000_0_1	167.345	159.256	175.435	1.10159	0.139587	0.602228	1
1822	dd_Smed_v6_12001_0_1	121.183	134.56	107.806	0.801177	-0.319807	0.246142	1
1823	dd_Smed_v6_12002_0_1	276.884	292.665	261.104	0.892161	-0.164624	0.574751	1
1824	dd_Smed_v6_12003_0_1	198.285	167.086	229.485	1.37345	0.457808	0.31946	1
1825	dd_Smed_v6_12004_0_1	105.848	105.503	106.193	1.00653	0.00939677	0.861151	1
1826	dd_Smed_v6_12006_0_1	134.364	130.64	138.088	1.05701	0.0799935	0.704883	1
1827	dd_Smed_v6_12007_0_1	15.2163	10.8727	19.5599	1.79899	0.847189	0.342043	1
1828	dd_Smed_v6_12008_0_1	303.778	288.619	318.936	1.10504	0.144102	0.625319	1
1829	dd_Smed_v6_1200_0_1	881.672	874.015	889.329	1.01752	0.025059	0.888473	1
1830	dd_Smed_v6_12010_0_1	163.696	161.426	165.965	1.02812	0.0400078	0.853176	1
1831	dd_Smed_v6_12011_0_1	164.166	161.432	166.901	1.03388	0.0480626	0.861047	1
1832	dd_Smed_v6_12013_0_1	165.605	169.396	161.813	0.955233	-0.0660758	0.862905	1
1833	dd_Smed_v6_12014_0_1	20.4006	21.9228	18.8784	0.861131	-0.215695	0.698101	1
1834	dd_Smed_v6_12016_0_1	210.776	208.683	212.87	1.02006	0.0286602	0.86812	1
1835	dd_Smed_v6_12017_0_1	740.306	719.672	760.939	1.05734	0.0804401	0.736263	1
1836	dd_Smed_v6_12018_0_1	274.715	295.018	254.412	0.862359	-0.213639	0.267521	1
1837	dd_Smed_v6_12019_0_1	161.202	161.435	160.969	0.997108	-0.00417783	0.969965	1
1838	dd_Smed_v6_1201_0_1	1907.33	1950.2	1864.47	0.95604	-0.0648573	0.76056	1
1839	dd_Smed_v6_12020_0_1	176.447	164.326	188.568	1.14752	0.198524	0.650614	1
1840	dd_Smed_v6_12022_0_1	229.099	196.305	261.893	1.33411	0.415883	0.145493	1
1841	dd_Smed_v6_12023_0_1	280.168	278.367	281.969	1.01294	0.0185495	0.912474	1
1842	dd_Smed_v6_12024_0_1	294.984	293.724	296.244	1.00858	0.0123247	0.924935	1
1843	dd_Smed_v6_12026_0_1	132.877	120.218	145.536	1.2106	0.275723	0.314798	1
1844	dd_Smed_v6_12027_0_1	498.915	517.824	480.006	0.926966	-0.109411	0.587169	1
1845	dd_Smed_v6_12029_0_1	241.988	248.531	235.446	0.94735	-0.078031	0.756699	1
1846	dd_Smed_v6_1202_0_1	79.9586	118.801	41.1167	0.346099	-1.53074	0.15905	1
1847	dd_Smed_v6_12031_0_1	143.055	147.066	139.044	0.945453	-0.0809218	0.617386	1
1848	dd_Smed_v6_12032_0_1	165.935	179.045	152.825	0.853557	-0.22844	0.376421	1
1849	dd_Smed_v6_12033_0_1	40.6386	28.6201	52.6571	1.83987	0.879602	0.00996716	1
1850	dd_Smed_v6_12035_0_1	105.799	113.772	97.8262	0.859848	-0.217847	0.447127	1
1851	dd_Smed_v6_12036_0_1	200.412	205.371	195.453	0.95171	-0.0714053	0.834008	1
1852	dd_Smed_v6_12037_0_1	222.279	211.749	232.809	1.09946	0.136794	0.520519	1
1853	dd_Smed_v6_12038_0_1	125.269	123.241	127.297	1.03291	0.0467147	0.870446	1
1854	dd_Smed_v6_1203_0_1	4361.29	4435.43	4287.15	0.96657	-0.0490544	0.805973	1
1855	dd_Smed_v6_12042_0_1	293.889	277.208	310.57	1.12035	0.163949	0.429152	1
1856	dd_Smed_v6_12043_0_1	252.522	253.703	251.34	0.990683	-0.013504	1	1
1857	dd_Smed_v6_12046_0_1	221.99	210.565	233.414	1.10851	0.148626	0.492245	1
1858	dd_Smed_v6_12047_0_1	176.905	181.892	171.917	0.945156	-0.0813757	0.764018	1
1859	dd_Smed_v6_12048_0_1	203.187	194.199	212.175	1.09257	0.12772	0.542739	1
1860	dd_Smed_v6_12049_0_1	67.8469	47.0276	88.6662	1.88541	0.914876	0.00690355	0.814005
1861	dd_Smed_v6_1204_0_1	2081.91	1930.95	2232.86	1.15635	0.209579	0.326158	1
1862	dd_Smed_v6_12050_0_1	250.761	286.952	214.57	0.747757	-0.419359	0.05151	1
1863	dd_Smed_v6_12051_0_1	45.5126	41.972	49.0532	1.16871	0.22492	0.690031	1
1864	dd_Smed_v6_12052_0_1	128.172	124.252	132.093	1.06311	0.088285	0.836384	1
1865	dd_Smed_v6_12053_0_1	160.342	155.194	165.49	1.06635	0.0926753	0.677974	1
1866	dd_Smed_v6_12054_0_1	38.3341	40.2179	36.4502	0.906317	-0.141912	0.75328	1
1867	dd_Smed_v6_12055_0_1	150.552	144.197	156.908	1.08815	0.121883	0.673604	1
1868	dd_Smed_v6_12056_0_1	396.809	403.229	390.39	0.968159	-0.0466837	0.903957	1
1869	dd_Smed_v6_12057_0_1	157.317	157.641	156.993	0.995894	-0.00593602	0.899227	1
1870	dd_Smed_v6_12058_0_1	253.945	273.641	234.248	0.856042	-0.224246	0.325664	1
1871	dd_Smed_v6_12059_0_1	272.206	214.91	329.502	1.53321	0.616557	0.133971	1
1872	dd_Smed_v6_1205_0_1	6897.17	7133.07	6661.27	0.933857	-0.0987259	0.642876	1
1873	dd_Smed_v6_12060_0_1	259.03	269.642	248.418	0.921289	-0.118274	0.64287	1
1874	dd_Smed_v6_12061_0_1	51.8228	44.4348	59.2107	1.33253	0.414169	0.143362	1
1875	dd_Smed_v6_12062_0_1	325.505	304.797	346.213	1.13588	0.183814	0.332372	1
1876	dd_Smed_v6_12063_0_1	279.154	275.743	282.565	1.02474	0.0352603	0.859445	1
1877	dd_Smed_v6_12065_0_2	59.4653	58.8709	60.0598	1.0202	0.0288457	0.965758	1
1878	dd_Smed_v6_12066_0_1	278.864	268.525	289.203	1.07701	0.107029	0.612086	1
1879	dd_Smed_v6_12067_0_1	59.7441	63.1004	56.3879	0.893621	-0.162265	0.550426	1
1880	dd_Smed_v6_12068_0_1	51.6181	44.4252	58.811	1.32382	0.40471	0.663955	1
1881	dd_Smed_v6_12069_0_1	205.988	194.516	217.459	1.11795	0.160851	0.553923	1
1882	dd_Smed_v6_1206_0_1	2449.08	2454.07	2444.1	0.995939	-0.00587086	0.962614	1
1883	dd_Smed_v6_12071_0_1	35.343	37.2195	33.4665	0.899166	-0.15334	0.622235	1
1884	dd_Smed_v6_12072_0_1	271.43	253.334	289.526	1.14286	0.192652	0.514762	1
1885	dd_Smed_v6_12073_0_1	169.178	152.932	185.425	1.21246	0.277942	0.242518	1
1886	dd_Smed_v6_12075_0_1	335.95	351.954	319.946	0.909054	-0.137562	0.529638	1
1887	dd_Smed_v6_12076_0_1	184.361	179.16	189.561	1.05805	0.0814136	0.746406	1
1888	dd_Smed_v6_1207_0_1	4549.91	4679.89	4419.93	0.944452	-0.0824513	0.698285	1
1889	dd_Smed_v6_12080_0_1	51.423	52.5426	50.3034	0.957383	-0.0628317	0.763497	1
1890	dd_Smed_v6_12081_0_1	140.812	139.183	142.441	1.0234	0.033373	0.858893	1
1891	dd_Smed_v6_12083_0_1	221.541	211.324	231.759	1.0967	0.133167	0.660934	1
1892	dd_Smed_v6_12085_0_1	60.0055	58.7638	61.2473	1.04226	0.059718	0.906014	1
1893	dd_Smed_v6_12088_0_1	5.86118	6.2914	5.43096	0.863235	-0.212175	0.773999	1
1894	dd_Smed_v6_12089_0_1	147.303	149.042	145.564	0.976669	-0.0340578	0.933984	1
1895	dd_Smed_v6_1208_0_1	3907.89	3909.16	3906.63	0.999351	-0.000936463	0.965248	1
1896	dd_Smed_v6_12090_0_1	16.7048	14.4867	18.9229	1.30622	0.385398	0.373653	1
1897	dd_Smed_v6_12091_0_1	108.359	110.207	106.512	0.966477	-0.0491923	0.895439	1
1898	dd_Smed_v6_12093_0_1	70.198	66.5716	73.8243	1.10895	0.14919	0.634473	1
1899	dd_Smed_v6_12096_0_1	111.628	99.3577	123.898	1.24699	0.318454	0.584122	1
1900	dd_Smed_v6_12097_0_1	231.866	246.682	217.05	0.87988	-0.184622	0.354351	1
1901	dd_Smed_v6_12098_0_1	56.6895	57.5173	55.8618	0.971217	-0.0421351	0.870303	1
1902	dd_Smed_v6_12099_0_11	13.9096	13.8551	13.9642	1.00788	0.0113171	1	1
1903	dd_Smed_v6_1209_0_1	3075.52	3081.76	3069.28	0.995953	-0.00585111	0.985747	1
1904	dd_Smed_v6_120_0_1	1513.05	1558.38	1467.71	0.941819	-0.0864782	0.832134	1
1905	dd_Smed_v6_12102_0_1	303.361	282.51	324.213	1.14762	0.198639	0.423974	1
1906	dd_Smed_v6_12103_0_1	161.801	144.013	179.589	1.24703	0.318501	0.179228	1
1907	dd_Smed_v6_12104_0_1	223.408	256.898	189.918	0.739275	-0.435818	0.0327855	1
1908	dd_Smed_v6_12105_0_1	819.05	778.73	859.37	1.10355	0.142156	0.452504	1
1909	dd_Smed_v6_12106_0_1	74.8974	78.8939	70.9009	0.898687	-0.154109	0.553206	1
1910	dd_Smed_v6_12107_0_1	142.974	124.775	161.172	1.2917	0.369273	0.232507	1
1911	dd_Smed_v6_12108_0_1	157.984	164.714	151.254	0.918284	-0.122987	0.695298	1
1912	dd_Smed_v6_12109_0_1	187.147	203.803	170.491	0.83655	-0.257476	0.318029	1
1913	dd_Smed_v6_1210_0_1	5778.43	6232.55	5324.31	0.854275	-0.227228	0.259183	1
1914	dd_Smed_v6_12110_0_1	72.4837	66.7551	78.2122	1.17163	0.228516	0.590085	1
1915	dd_Smed_v6_12111_0_1	203.351	211.775	194.928	0.920446	-0.119594	0.719892	1
1916	dd_Smed_v6_12112_0_1	46.1369	44.5776	47.6962	1.06996	0.0975552	0.66763	1
1917	dd_Smed_v6_12113_0_1	151.956	129.844	174.068	1.34059	0.422869	0.241381	1
1918	dd_Smed_v6_12114_0_1	70.8333	68.0638	73.6028	1.08138	0.112873	0.678931	1
1919	dd_Smed_v6_12115_0_1	298.19	270.27	326.111	1.20661	0.270963	0.209325	1
1920	dd_Smed_v6_12116_0_1	80.8281	89.6795	71.9766	0.802599	-0.317249	0.173995	1
1921	dd_Smed_v6_12117_0_1	11.1626	7.99331	14.3319	1.79298	0.842361	0.115987	1
1922	dd_Smed_v6_12118_0_1	226.078	252.925	199.231	0.787707	-0.344268	0.133725	1
1923	dd_Smed_v6_12119_1_1	219.454	225.496	213.412	0.946409	-0.0794641	0.695511	1
1924	dd_Smed_v6_1211_0_1	4845.87	4891.46	4800.28	0.981359	-0.0271477	0.927775	1
1925	dd_Smed_v6_12122_0_1	372.644	370.386	374.902	1.01219	0.0174827	0.945595	1
1926	dd_Smed_v6_12123_0_1	360.156	363.906	356.405	0.97939	-0.0300453	0.877669	1
1927	dd_Smed_v6_12125_0_1	128.639	130.381	126.898	0.973291	-0.0390571	0.90521	1
1928	dd_Smed_v6_12126_0_1	97.8027	100.548	95.0571	0.945389	-0.0810206	0.849258	1
1929	dd_Smed_v6_12126_1_1	72.508	74.9851	70.0309	0.933931	-0.0986124	0.763267	1
1930	dd_Smed_v6_12128_0_1	37.1932	37.2739	37.1125	0.995668	-0.00626288	1	1
1931	dd_Smed_v6_1212_0_1	2821.13	3019.59	2622.68	0.868554	-0.203313	0.301026	1
1932	dd_Smed_v6_12130_0_1	268.256	263.496	273.016	1.03613	0.0511999	0.772801	1
1933	dd_Smed_v6_12132_0_1	60.2038	62.8563	57.5513	0.915601	-0.127209	0.658069	1
1934	dd_Smed_v6_12133_0_1	112.011	107.12	116.903	1.09133	0.126084	0.601482	1
1935	dd_Smed_v6_12135_0_1	160.753	166.674	154.833	0.928953	-0.106323	0.639695	1
1936	dd_Smed_v6_12136_0_1	236.143	197.539	274.748	1.39085	0.475968	0.10868	1
1937	dd_Smed_v6_12138_0_1	9.38707	10.8183	7.95588	0.735411	-0.443377	0.501564	1
1938	dd_Smed_v6_12139_0_1	43.0823	43.8414	42.3232	0.96537	-0.0508464	0.856095	1
1939	dd_Smed_v6_1213_0_1	1018.21	918.833	1117.58	1.2163	0.282503	0.186176	1
1940	dd_Smed_v6_12140_0_1	270.507	270.143	270.87	1.00269	0.00387583	0.929241	1
1941	dd_Smed_v6_12141_0_1	119.843	103.295	136.39	1.32039	0.400959	0.121384	1
1942	dd_Smed_v6_12142_0_1	215.992	225.748	206.235	0.913563	-0.130423	0.581785	1
1943	dd_Smed_v6_12144_0_1	87.7031	89.8712	85.5351	0.951752	-0.0713427	0.883261	1
1944	dd_Smed_v6_12145_0_1	87.7048	87.3062	88.1035	1.00913	0.0131156	0.917178	1
1945	dd_Smed_v6_12146_0_1	265.081	261.962	268.199	1.02381	0.0339469	0.853764	1
1946	dd_Smed_v6_12147_0_1	8.98451	8.03415	9.93487	1.23658	0.306356	0.632006	1
1947	dd_Smed_v6_12148_0_1	162.49	136.608	188.372	1.37892	0.46354	0.067446	1
1948	dd_Smed_v6_1214_0_1	873.272	736.119	1010.43	1.37264	0.456952	0.373475	1
1949	dd_Smed_v6_12150_0_1	202.483	196.86	208.107	1.05713	0.0801563	0.675097	1
1950	dd_Smed_v6_12151_0_1	60.1748	59.924	60.4257	1.00837	0.0120263	0.890386	1
1951	dd_Smed_v6_12152_0_1	58.8057	61.7247	55.8867	0.905418	-0.143344	0.690752	1
1952	dd_Smed_v6_12153_0_2	84.5185	93.1361	75.9009	0.814945	-0.295225	0.234387	1
1953	dd_Smed_v6_12154_0_1	89.8876	69.3236	110.452	1.59328	0.671996	0.215715	1
1954	dd_Smed_v6_12155_0_1	284.694	306.271	263.117	0.859097	-0.219107	0.312905	1
1955	dd_Smed_v6_12156_0_1	43.8852	38.5523	49.218	1.27665	0.352367	0.591546	1
1956	dd_Smed_v6_12157_0_1	84.4116	78.1007	90.7226	1.16161	0.216127	0.589333	1
1957	dd_Smed_v6_12158_0_1	114.243	123.452	105.035	0.850819	-0.233076	0.390376	1
1958	dd_Smed_v6_12159_0_1	87.392	97.9651	76.819	0.784147	-0.350803	0.155854	1
1959	dd_Smed_v6_1215_0_1	5597.51	6041.41	5153.61	0.853048	-0.229301	0.217617	1
1960	dd_Smed_v6_12160_0_1	176.688	181.411	171.965	0.947931	-0.0771464	0.663088	1
1961	dd_Smed_v6_12161_0_1	215.61	214.038	217.182	1.01469	0.0210383	0.81721	1
1962	dd_Smed_v6_12162_0_1	178.728	177.819	179.637	1.01022	0.0146763	0.981142	1
1963	dd_Smed_v6_12164_0_1	14.1369	15.8939	12.38	0.778915	-0.360461	0.492796	1
1964	dd_Smed_v6_12165_0_1	229.12	232.579	225.661	0.970254	-0.0435653	0.800241	1
1965	dd_Smed_v6_12166_0_1	292.777	293.759	291.795	0.993316	-0.00967484	0.988462	1
1966	dd_Smed_v6_12168_0_1	213.528	208.848	218.208	1.04481	0.0632475	0.7542	1
1967	dd_Smed_v6_12169_0_1	161.72	155.302	168.138	1.08265	0.11457	0.559376	1
1968	dd_Smed_v6_1216_0_1	1790.66	1969.02	1612.3	0.818835	-0.288356	0.149821	1
1969	dd_Smed_v6_12170_0_1	216.567	210.964	222.17	1.05312	0.0746659	0.749183	1
1970	dd_Smed_v6_12171_0_1	111.338	107.554	115.122	1.07037	0.0981135	0.675196	1
1971	dd_Smed_v6_12172_0_1	244.167	263.578	224.756	0.85271	-0.229874	0.315033	1
1972	dd_Smed_v6_12173_0_1	180.407	177.279	183.535	1.03529	0.0500349	0.852125	1
1973	dd_Smed_v6_12174_0_1	184.22	188.575	179.865	0.953811	-0.068225	0.814821	1
1974	dd_Smed_v6_12176_0_1	204.72	197.164	212.275	1.07664	0.106538	0.631587	1
1975	dd_Smed_v6_12177_0_1	311.521	304.771	318.27	1.04429	0.0625229	0.784651	1
1976	dd_Smed_v6_12178_0_1	163.12	170.557	155.683	0.91279	-0.131646	0.624174	1
1977	dd_Smed_v6_12179_0_1	163.87	153.765	173.975	1.13144	0.178155	0.406344	1
1978	dd_Smed_v6_1217_0_1	1165.99	1032.29	1299.69	1.25904	0.332319	0.582113	1
1979	dd_Smed_v6_12180_0_1	31.7805	29.4393	34.1218	1.15906	0.212952	0.512078	1
1980	dd_Smed_v6_12181_1_1	97.7179	94.921	100.515	1.05893	0.0826094	0.723759	1
1981	dd_Smed_v6_12182_0_1	179.864	187.599	172.129	0.91754	-0.124158	0.607363	1
1982	dd_Smed_v6_12183_0_1	235.491	243.256	227.725	0.936154	-0.0951818	0.755643	1
1983	dd_Smed_v6_12185_0_1	261.205	267.92	254.489	0.949869	-0.0742	0.69918	1
1984	dd_Smed_v6_12187_0_1	255.247	226.651	283.843	1.25234	0.324621	0.526546	1
1985	dd_Smed_v6_12188_0_1	80.3873	68.8228	91.9518	1.33607	0.417992	0.194982	1
1986	dd_Smed_v6_1218_0_1	2200.48	2325.91	2075.04	0.892143	-0.164653	0.420746	1
1987	dd_Smed_v6_12190_0_1	57.7455	65.212	50.279	0.771009	-0.375181	0.188028	1
1988	dd_Smed_v6_12192_0_1	278.889	244.837	312.941	1.27816	0.354064	0.178907	1
1989	dd_Smed_v6_12193_0_1	229.233	228.66	229.806	1.00501	0.00721271	0.981827	1
1990	dd_Smed_v6_12194_0_1	240.434	241.162	239.706	0.993964	-0.00873495	0.988845	1
1991	dd_Smed_v6_12195_0_1	89.6549	80.9376	98.3723	1.21541	0.281441	0.566344	1
1992	dd_Smed_v6_12196_0_1	12.2144	9.84969	14.5792	1.48017	0.565762	0.29651	1
1993	dd_Smed_v6_12197_0_1	218.528	193.467	243.589	1.25907	0.332363	0.278171	1
1994	dd_Smed_v6_1219_1_1	5409.84	5366.1	5453.59	1.0163	0.0233307	0.823688	1
1995	dd_Smed_v6_121_0_1	22632.4	22732.6	22532.1	0.991181	-0.0127791	0.936456	1
1996	dd_Smed_v6_12201_0_1	223.16	226.985	219.335	0.966298	-0.0494596	0.825944	1
1997	dd_Smed_v6_12202_0_1	171.793	152.555	191.031	1.25221	0.324476	0.496141	1
1998	dd_Smed_v6_12203_0_1	127.372	121.053	133.691	1.1044	0.143267	0.60899	1
1999	dd_Smed_v6_12204_0_1	15.8844	16.3469	15.4219	0.943411	-0.0840415	0.891526	1
[truncated: 15,216 more rows]

## Sheet: day 4 irradiation
	id	baseMean	baseMeanA	baseMeanB	foldChange	log2FoldChange	pval	padj
1	dd_Smed_v6_10001_0_1	94.7771	104.143	85.4107	0.820125	-0.286084	0.383716	0.942251
2	dd_Smed_v6_10002_0_1	245.451	265.763	225.139	0.847144	-0.239321	0.242826	0.896216
3	dd_Smed_v6_10003_0_1	482.821	520.246	445.396	0.856126	-0.224104	0.247463	0.899566
4	dd_Smed_v6_10004_0_1	62.32	58.3604	66.2797	1.1357	0.183577	0.47786	0.962187
5	dd_Smed_v6_10005_0_1	62.7416	52.6683	72.8149	1.38252	0.467299	0.215669	0.882103
6	dd_Smed_v6_10006_0_1	47.1988	45.1518	49.2458	1.09067	0.125217	0.668764	0.988675
7	dd_Smed_v6_10007_0_1	246.264	232.677	259.851	1.11679	0.159352	0.463377	0.96106
8	dd_Smed_v6_1000_0_1	2863.77	2672.31	3055.23	1.14329	0.193197	0.29146	0.91846
9	dd_Smed_v6_10010_0_1	225.022	226.86	223.183	0.983793	-0.0235739	0.924737	1
10	dd_Smed_v6_10011_0_1	670.674	709.98	631.368	0.889276	-0.169296	0.385329	0.942285
11	dd_Smed_v6_10013_0_1	342.676	361.75	323.601	0.894543	-0.160778	0.430715	0.95588
12	dd_Smed_v6_10014_0_1	77.793	97.2708	58.3151	0.599512	-0.738138	0.0635714	0.832931
13	dd_Smed_v6_10015_0_1	285.996	315.954	256.037	0.810361	-0.303363	0.172325	0.862094
14	dd_Smed_v6_10016_0_1	292.961	284.724	301.197	1.05786	0.0811423	0.689231	0.989137
15	dd_Smed_v6_10017_0_1	61.5211	60.0172	63.025	1.05012	0.0705478	0.823039	1
16	dd_Smed_v6_10018_0_1	248.568	237.108	260.028	1.09666	0.133123	0.516473	0.967326
17	dd_Smed_v6_10019_0_1	0.160314	0	0.320628	Inf	Inf	1	1
18	dd_Smed_v6_1001_0_1	1577.11	1382.33	1771.9	1.28182	0.358197	0.0865113	0.844208
19	dd_Smed_v6_10020_0_1	256.673	262.66	250.686	0.954412	-0.0673163	0.740309	0.99503
20	dd_Smed_v6_10021_0_1	75.1621	78.325	71.9991	0.919234	-0.121496	0.673503	0.988675
21	dd_Smed_v6_10022_0_1	266.894	276.105	257.682	0.933276	-0.0996239	0.613974	0.979113
22	dd_Smed_v6_10024_0_1	1259.98	1525.49	994.465	0.651898	-0.617283	0.0011957	0.342002
23	dd_Smed_v6_10025_0_1	229.896	232.716	227.076	0.975764	-0.035396	0.883986	1
24	dd_Smed_v6_10026_0_1	53.3477	47.8093	58.8861	1.23169	0.300636	0.335011	0.929132
25	dd_Smed_v6_10027_0_1	143.37	157.797	128.943	0.817146	-0.291334	0.188382	0.871776
26	dd_Smed_v6_10028_0_1	61.1885	69.029	53.348	0.772835	-0.371768	0.480929	0.962187
27	dd_Smed_v6_10029_0_1	989.286	1137.46	841.113	0.739466	-0.435444	0.0223903	0.726306
28	dd_Smed_v6_1002_0_1	4104.84	4042.71	4166.96	1.03073	0.0436699	0.81229	1
29	dd_Smed_v6_10030_0_1	172.04	174.585	169.495	0.970846	-0.0426854	0.8578	1
30	dd_Smed_v6_10031_0_1	77.3375	83.1412	71.5338	0.86039	-0.216938	0.369517	0.934885
31	dd_Smed_v6_10032_0_1	320.407	262.28	378.535	1.44325	0.529318	0.00928295	0.655775
32	dd_Smed_v6_10033_0_1	138.028	131.6	144.455	1.09769	0.134468	0.547006	0.971902
33	dd_Smed_v6_10034_0_1	216.933	207.17	226.696	1.09425	0.129947	0.537154	0.971807
34	dd_Smed_v6_10035_0_1	348.743	421.825	275.661	0.653496	-0.61375	0.0923893	0.844208
35	dd_Smed_v6_10036_0_1	105.114	90.637	119.59	1.31944	0.399927	0.13663	0.858367
36	dd_Smed_v6_10037_0_1	142.283	166.527	118.04	0.708832	-0.496484	0.0429636	0.807435
37	dd_Smed_v6_10038_0_1	241.804	211.976	271.632	1.28142	0.357749	0.0847612	0.844208
38	dd_Smed_v6_10039_0_1	100.035	90.2478	109.823	1.2169	0.283212	0.241929	0.894631
39	dd_Smed_v6_1003_0_1	51.5488	81.4092	21.6885	0.266413	-1.90826	0.126892	0.856547
40	dd_Smed_v6_10040_0_1	55.5969	51.8141	59.3798	1.14602	0.196628	0.510391	0.966976
41	dd_Smed_v6_10041_0_1	1037.42	994.031	1080.8	1.08729	0.12074	0.526785	0.968961
42	dd_Smed_v6_10042_0_1	419.312	413.353	425.271	1.02883	0.0410096	0.86177	1
43	dd_Smed_v6_10043_0_1	342.857	349.68	336.035	0.960979	-0.0574233	0.774739	1
44	dd_Smed_v6_10044_0_1	96.1119	99.8345	92.3893	0.925425	-0.111812	0.695267	0.989137
45	dd_Smed_v6_10045_0_1	440.301	458.655	421.947	0.919966	-0.120348	0.524137	0.96895
46	dd_Smed_v6_10046_0_1	211.743	220.574	202.912	0.919929	-0.120406	0.562869	0.973935
47	dd_Smed_v6_10047_0_1	82.991	83.0645	82.9174	0.998229	-0.00255762	0.998255	1
48	dd_Smed_v6_10048_0_1	694.562	661.043	728.08	1.10141	0.139353	0.486684	0.963083
49	dd_Smed_v6_10049_0_1	201.739	189.716	213.763	1.12675	0.172171	0.470227	0.961188
50	dd_Smed_v6_1004_0_1	4961.74	5077.51	4845.98	0.954402	-0.0673318	0.716988	0.992767
51	dd_Smed_v6_10050_0_1	27.7624	31.5291	23.9957	0.761064	-0.39391	0.607309	0.978821
52	dd_Smed_v6_10051_0_1	434.918	459.776	410.06	0.891871	-0.165094	0.408542	0.950568
53	dd_Smed_v6_10052_0_1	309.492	303.875	315.108	1.03697	0.0523677	0.797588	1
54	dd_Smed_v6_10053_0_1	40.7679	44.799	36.7369	0.820039	-0.286235	0.595351	0.977433
55	dd_Smed_v6_10054_0_1	246.704	291.49	201.919	0.692713	-0.529671	0.114059	0.849478
56	dd_Smed_v6_10055_0_1	220.691	228.842	212.54	0.928766	-0.106612	0.617633	0.979737
57	dd_Smed_v6_10056_0_1	121.339	131.302	111.375	0.848235	-0.237464	0.351342	0.929132
58	dd_Smed_v6_10058_0_1	869.541	917.941	821.14	0.894546	-0.160773	0.401104	0.948205
59	dd_Smed_v6_10059_0_1	325.734	323.752	327.717	1.01225	0.0175654	0.9247	1
60	dd_Smed_v6_10060_0_1	90.1856	93.2698	87.1015	0.933866	-0.0987119	0.834744	1
61	dd_Smed_v6_10061_0_1	399.842	406.788	392.896	0.965849	-0.0501302	0.804417	1
62	dd_Smed_v6_10062_0_1	846.14	891.774	800.506	0.897656	-0.155766	0.414358	0.951221
63	dd_Smed_v6_10064_0_1	111.725	101.103	122.346	1.21011	0.275139	0.228466	0.886658
64	dd_Smed_v6_10065_0_1	217.946	203.406	232.487	1.14297	0.192789	0.347533	0.929132
65	dd_Smed_v6_10066_0_1	654.138	650.365	657.91	1.0116	0.0166396	0.920396	1
66	dd_Smed_v6_10067_0_1	6.34644	5.2971	7.39577	1.39619	0.481496	0.666809	0.988675
67	dd_Smed_v6_10068_0_1	122.998	123.681	122.314	0.988946	-0.0160361	0.949319	1
68	dd_Smed_v6_10069_0_1	244.403	242.568	246.238	1.01513	0.0216614	0.911402	1
69	dd_Smed_v6_1006_0_1	2835.14	2516.5	3153.79	1.25324	0.325666	0.162674	0.861426
70	dd_Smed_v6_10070_0_1	558.546	537.222	579.87	1.07939	0.110213	0.583477	0.976959
71	dd_Smed_v6_10072_0_1	1049.91	1164.3	935.528	0.80351	-0.315612	0.0958984	0.844208
72	dd_Smed_v6_10073_0_1	334.416	325.298	343.534	1.05606	0.0786879	0.696405	0.989137
73	dd_Smed_v6_10074_0_1	404.457	451.705	357.209	0.790803	-0.33861	0.101512	0.848514
74	dd_Smed_v6_10075_0_1	418.882	377.868	459.897	1.21709	0.283431	0.149596	0.860292
75	dd_Smed_v6_10076_0_1	21.4912	23.562	19.4204	0.824223	-0.278893	0.655497	0.985997
76	dd_Smed_v6_10078_0_1	162.113	157.133	167.093	1.06338	0.0886613	0.690103	0.989137
77	dd_Smed_v6_10079_0_1	526.35	500.328	552.372	1.10402	0.142764	0.473142	0.961731
78	dd_Smed_v6_1007_0_1	1885.34	1723.29	2047.4	1.18808	0.248627	0.179288	0.866457
79	dd_Smed_v6_10081_0_1	100.231	103.149	97.3138	0.943432	-0.0840101	0.739715	0.99503
80	dd_Smed_v6_10082_0_1	363.462	342.43	384.495	1.12284	0.167157	0.408301	0.950564
81	dd_Smed_v6_10083_0_1	309.204	277.984	340.424	1.22462	0.292331	0.151603	0.860292
82	dd_Smed_v6_10084_0_1	13.9068	11.6447	16.169	1.38853	0.473556	0.311184	0.925449
83	dd_Smed_v6_10086_0_1	479.355	491.269	467.442	0.951499	-0.0717263	0.714715	0.99251
84	dd_Smed_v6_10087_0_1	365.479	370.985	359.973	0.970318	-0.04347	0.842543	1
85	dd_Smed_v6_10088_0_1	45.0023	44.9922	45.0124	1.00045	0.000646999	0.981628	1
86	dd_Smed_v6_10089_0_1	377.853	435.074	320.632	0.736958	-0.440345	0.0270034	0.748244
87	dd_Smed_v6_1008_0_1	12201.8	10418.3	13985.3	1.34238	0.424793	0.020181	0.695695
88	dd_Smed_v6_10090_0_1	77.1529	88.9917	65.3142	0.733936	-0.446274	0.266866	0.910798
89	dd_Smed_v6_10092_0_1	240.277	264.89	215.665	0.81417	-0.296599	0.163166	0.861426
90	dd_Smed_v6_10093_0_1	121.287	145.295	97.278	0.669519	-0.578802	0.1708	0.862094
91	dd_Smed_v6_10094_0_1	442.815	454.397	431.233	0.949023	-0.0754845	0.697069	0.989137
92	dd_Smed_v6_10095_0_1	136.143	129.318	142.968	1.10556	0.144772	0.532288	0.96977
93	dd_Smed_v6_10096_0_1	196.556	191.587	201.524	1.05187	0.0729588	0.744879	0.99503
94	dd_Smed_v6_10097_0_1	258.459	245.664	271.255	1.10417	0.142965	0.497415	0.965126
95	dd_Smed_v6_10098_0_1	19.0899	19.9518	18.228	0.913604	-0.13036	0.823711	1
96	dd_Smed_v6_10099_0_1	220.531	221.952	219.111	0.987202	-0.0185822	0.935248	1
97	dd_Smed_v6_1009_0_1	3696.99	3522.56	3871.42	1.09903	0.136236	0.458058	0.960203
98	dd_Smed_v6_1009_1_1	808.406	828.097	788.714	0.952442	-0.0702969	0.721085	0.993507
99	dd_Smed_v6_100_0_1	84457	72758.4	96155.6	1.32157	0.402257	0.0276928	0.752002
100	dd_Smed_v6_10100_0_1	201.838	209.005	194.67	0.931415	-0.102504	0.660021	0.987105
101	dd_Smed_v6_10101_0_1	99.8403	113.175	86.5061	0.76436	-0.387676	0.157718	0.861426
102	dd_Smed_v6_10102_0_1	118.916	100.999	136.832	1.35478	0.438061	0.063358	0.832931
103	dd_Smed_v6_10103_0_1	431.285	423.247	439.324	1.03799	0.0537866	0.785967	1
104	dd_Smed_v6_10104_0_1	66.496	56.5484	76.4435	1.35183	0.434909	0.105384	0.849478
105	dd_Smed_v6_10105_0_1	371.491	395.481	347.501	0.878679	-0.186591	0.363061	0.932873
106	dd_Smed_v6_10106_0_1	363.871	346.101	381.642	1.10269	0.141027	0.490686	0.964963
107	dd_Smed_v6_10107_0_1	516.69	538.906	494.473	0.917549	-0.124143	0.538621	0.971807
108	dd_Smed_v6_10108_0_1	164.839	158.141	171.536	1.08471	0.117303	0.590311	0.976959
109	dd_Smed_v6_10109_0_1	41.9799	54.429	29.5308	0.542557	-0.882154	0.120986	0.8542
110	dd_Smed_v6_1010_0_1	12808.2	12272.9	13343.5	1.08724	0.120665	0.511795	0.96732
111	dd_Smed_v6_10110_0_1	277.103	275.493	278.713	1.01169	0.016762	0.902338	1
112	dd_Smed_v6_10111_0_1	100.078	104.562	95.5945	0.914237	-0.129359	0.588625	0.976959
113	dd_Smed_v6_10112_0_1	358.691	318.211	399.171	1.25442	0.327024	0.213058	0.882103
114	dd_Smed_v6_10113_0_1	97.8028	100.077	95.5288	0.954556	-0.067098	0.783343	1
115	dd_Smed_v6_10115_0_1	610.921	604.256	617.586	1.02206	0.031478	0.861589	1
116	dd_Smed_v6_10116_0_1	695.795	693.06	698.53	1.00789	0.011342	0.938767	1
117	dd_Smed_v6_10117_0_1	685.241	679.92	690.562	1.01565	0.0224041	0.918784	1
118	dd_Smed_v6_10119_0_1	239.417	230.749	248.086	1.07513	0.104515	0.606271	0.978821
119	dd_Smed_v6_1011_0_1	191.921	241.351	142.491	0.590387	-0.760267	0.241729	0.894471
120	dd_Smed_v6_10120_0_1	615.003	686.621	543.384	0.791389	-0.337541	0.0862421	0.844208
121	dd_Smed_v6_10121_0_1	459.236	480.625	437.846	0.910992	-0.134489	0.498616	0.965145
122	dd_Smed_v6_10122_0_1	93.4651	88.7141	98.2161	1.10711	0.146797	0.546386	0.971902
123	dd_Smed_v6_10123_0_1	81.9888	98.3922	65.5854	0.666571	-0.585169	0.230955	0.887243
124	dd_Smed_v6_10124_0_1	200.558	183.816	217.301	1.18217	0.241433	0.264243	0.910359
125	dd_Smed_v6_10126_0_1	19.3179	22.5729	16.0629	0.711601	-0.49086	0.21421	0.882103
126	dd_Smed_v6_10127_0_1	196.424	206.92	185.927	0.898546	-0.154336	0.451494	0.960203
127	dd_Smed_v6_10128_0_1	182.01	213.031	150.988	0.708762	-0.496627	0.18477	0.87008
128	dd_Smed_v6_10129_0_1	401.002	344.469	457.535	1.32823	0.409509	0.0407311	0.802036
129	dd_Smed_v6_1012_0_1	1764.03	1717.82	1810.24	1.0538	0.0756008	0.674469	0.988675
130	dd_Smed_v6_10130_0_1	818.721	854.901	782.541	0.915359	-0.127591	0.515952	0.967326
131	dd_Smed_v6_10131_0_1	361.793	348.511	375.075	1.07622	0.105977	0.58673	0.976959
132	dd_Smed_v6_10132_0_1	353.841	321.887	385.796	1.19855	0.261284	0.199758	0.877491
133	dd_Smed_v6_10133_0_1	174.382	159.605	189.159	1.18517	0.245096	0.250718	0.903152
134	dd_Smed_v6_10134_0_1	241.893	256.194	227.592	0.888359	-0.170786	0.407276	0.950289
135	dd_Smed_v6_10135_0_1	838.126	811.071	865.181	1.06671	0.0931741	0.617755	0.979737
136	dd_Smed_v6_10136_0_1	266.331	276.243	256.419	0.928237	-0.107435	0.589475	0.976959
137	dd_Smed_v6_10138_0_10	66.7214	53.6823	79.7605	1.48579	0.571229	0.0789987	0.844208
138	dd_Smed_v6_10139_0_1	193.697	224.099	163.295	0.728677	-0.456649	0.0408536	0.802036
139	dd_Smed_v6_1013_0_1	2.74854	1.31662	4.18046	3.17516	1.66683	0.0578181	0.827552
140	dd_Smed_v6_10140_0_1	600.466	650.621	550.312	0.845827	-0.241566	0.219004	0.882103
141	dd_Smed_v6_10141_0_1	240.331	233.221	247.441	1.06097	0.0853893	0.70848	0.991224
142	dd_Smed_v6_10142_0_1	660.442	682.537	638.348	0.935258	-0.0965643	0.606347	0.978821
143	dd_Smed_v6_10143_0_1	243.916	225.538	262.294	1.16297	0.217817	0.352172	0.929275
144	dd_Smed_v6_10144_0_1	382.493	372.751	392.234	1.05227	0.0735042	0.714723	0.99251
145	dd_Smed_v6_10145_0_1	132.036	143.306	120.765	0.842709	-0.246894	0.314153	0.925818
146	dd_Smed_v6_10146_0_1	69.9508	81.619	58.2827	0.714082	-0.485838	0.167464	0.862094
147	dd_Smed_v6_10147_0_1	423.709	466.421	380.998	0.816854	-0.291849	0.217794	0.882103
148	dd_Smed_v6_10148_0_1	502.195	493.929	510.461	1.03347	0.0474975	0.791406	1
149	dd_Smed_v6_10149_0_1	177.382	188.961	165.803	0.877448	-0.188614	0.440137	0.960189
150	dd_Smed_v6_10150_0_1	96.4836	100.961	92.0062	0.911305	-0.133994	0.569919	0.975969
151	dd_Smed_v6_10151_0_1	494.733	510.962	478.504	0.936477	-0.0946843	0.626437	0.979876
152	dd_Smed_v6_10152_0_1	298.652	289.574	307.73	1.0627	0.0877337	0.67965	0.98891
153	dd_Smed_v6_10153_0_1	27.2427	34.4223	20.063	0.58285	-0.778804	0.0298963	0.762387
154	dd_Smed_v6_10155_0_1	377.215	349.709	404.722	1.15731	0.210777	0.28699	0.917484
155	dd_Smed_v6_10156_0_1	745.547	734.786	756.307	1.02929	0.0416476	0.823134	1
156	dd_Smed_v6_10157_0_1	122.494	126.139	118.849	0.942203	-0.0858908	0.718917	0.992946
157	dd_Smed_v6_10158_0_1	193.042	179.605	206.479	1.14962	0.201161	0.372403	0.936834
158	dd_Smed_v6_10159_0_1	259.321	266.165	252.478	0.948575	-0.0761657	0.716231	0.992767
159	dd_Smed_v6_1015_0_1	1418.93	1191.75	1646.11	1.38125	0.465971	0.013735	0.667071
160	dd_Smed_v6_10160_0_1	460.715	503.759	417.671	0.829108	-0.270368	0.176266	0.866159
161	dd_Smed_v6_10161_0_1	161.695	184.13	139.261	0.756315	-0.402941	0.107829	0.849478
162	dd_Smed_v6_10162_0_1	93.9936	92.244	95.7431	1.03793	0.0537137	0.829033	1
163	dd_Smed_v6_10163_0_1	82.4399	67.4651	97.4147	1.44393	0.529998	0.165047	0.861426
164	dd_Smed_v6_10164_0_1	541.563	548.604	534.522	0.97433	-0.0375175	0.864996	1
165	dd_Smed_v6_10165_0_1	247.486	235.956	259.016	1.09773	0.134524	0.520458	0.96745
166	dd_Smed_v6_10166_0_10	108.749	86.1633	131.336	1.52426	0.608113	0.0100792	0.655775
167	dd_Smed_v6_10167_0_1	334.999	297.257	372.741	1.25393	0.326461	0.105737	0.849478
168	dd_Smed_v6_10168_0_1	89.4127	101.2	77.6254	0.76705	-0.382607	0.438493	0.959862
169	dd_Smed_v6_10169_0_1	113.681	97.4494	129.913	1.33314	0.414826	0.0695822	0.841426
170	dd_Smed_v6_1016_0_1	832.53	893.681	771.378	0.863148	-0.21232	0.242575	0.895482
171	dd_Smed_v6_10170_0_1	302.575	347.814	257.336	0.739866	-0.434664	0.0994199	0.847597
172	dd_Smed_v6_10171_0_1	450.436	457.851	443.02	0.967608	-0.0475058	0.816885	1
173	dd_Smed_v6_10173_0_1	395.409	363.935	426.883	1.17296	0.230159	0.254172	0.905544
174	dd_Smed_v6_10174_0_1	250.328	307.202	193.453	0.629726	-0.667203	0.073008	0.844208
175	dd_Smed_v6_10175_0_1	285.267	271.059	299.475	1.10484	0.143832	0.483272	0.96257
176	dd_Smed_v6_10176_0_1	729.426	717.172	741.68	1.03417	0.048478	0.800778	1
177	dd_Smed_v6_10178_0_1	47.473	42.1841	52.7619	1.25075	0.322797	0.288234	0.917484
178	dd_Smed_v6_10179_0_1	47.7781	54.4686	41.0876	0.754337	-0.40672	0.39429	0.944129
179	dd_Smed_v6_1017_0_1	2229.64	2251.22	2208.07	0.980831	-0.0279228	0.959832	1
180	dd_Smed_v6_10180_0_1	258.966	244.637	273.294	1.11714	0.159813	0.452336	0.960203
181	dd_Smed_v6_10181_0_1	15.8455	16.6203	15.0707	0.906769	-0.141193	0.770261	1
182	dd_Smed_v6_10182_0_1	190.468	174.932	206.005	1.17763	0.23589	0.268403	0.910799
183	dd_Smed_v6_10183_0_1	311.213	308.011	314.415	1.02079	0.0296876	0.870733	1
184	dd_Smed_v6_10184_0_1	384.66	396.12	373.2	0.942138	-0.0859893	0.683999	0.988947
185	dd_Smed_v6_10185_0_1	271.03	269.274	272.786	1.01304	0.0186977	0.942138	1
186	dd_Smed_v6_10186_0_1	406.806	373.174	440.438	1.18025	0.239089	0.225786	0.886658
187	dd_Smed_v6_10187_0_1	198.953	184.645	213.261	1.15498	0.207866	0.323014	0.928833
188	dd_Smed_v6_10188_0_1	98.4835	106.739	90.2278	0.845311	-0.242446	0.321444	0.928833
189	dd_Smed_v6_10189_0_1	236.064	247.126	225.001	0.910469	-0.135318	0.521639	0.96745
190	dd_Smed_v6_1018_0_1	2079.16	2081.61	2076.7	0.997641	-0.00340698	0.985347	1
191	dd_Smed_v6_10190_0_1	212.304	239.742	184.866	0.771105	-0.375002	0.257995	0.908396
192	dd_Smed_v6_10191_0_1	162.087	145.213	178.961	1.23241	0.30148	0.238995	0.891716
193	dd_Smed_v6_10192_0_1	581.959	562.526	601.393	1.06909	0.096388	0.642255	0.984552
194	dd_Smed_v6_10193_0_1	79.9546	77.3289	82.5802	1.06791	0.0947883	0.73672	0.99503
195	dd_Smed_v6_10194_0_1	210.416	195.865	224.967	1.14858	0.199853	0.436385	0.959545
196	dd_Smed_v6_10195_0_1	66.643	69.708	63.5779	0.91206	-0.132799	0.641396	0.984328
197	dd_Smed_v6_10196_0_1	33.3886	32.8701	33.9071	1.03155	0.0448128	0.923652	1
198	dd_Smed_v6_10198_0_1	275.051	274.762	275.341	1.00211	0.0030338	0.978847	1
199	dd_Smed_v6_10199_0_1	436.949	405.142	468.756	1.15702	0.21041	0.29256	0.918665
200	dd_Smed_v6_1019_0_1	2906.55	2917.94	2895.17	0.992197	-0.0113012	0.949222	1
201	dd_Smed_v6_101_0_1	34255.5	32872.9	35638.1	1.08412	0.116521	0.50796	0.965871
202	dd_Smed_v6_10200_0_1	306.523	286.507	326.539	1.13972	0.188685	0.354088	0.929607
203	dd_Smed_v6_10201_0_1	275.441	286.134	264.748	0.925257	-0.112074	0.610454	0.978821
204	dd_Smed_v6_10203_0_1	286.703	253.53	319.876	1.26169	0.335356	0.10428	0.848729
205	dd_Smed_v6_10205_0_1	445.638	496.018	395.258	0.796863	-0.327597	0.0953534	0.844208
206	dd_Smed_v6_10206_0_1	217.44	224.469	210.412	0.937378	-0.0932979	0.651966	0.985339
207	dd_Smed_v6_10207_0_1	293.219	289.826	296.613	1.02342	0.033399	0.871843	1
208	dd_Smed_v6_10208_0_1	401.159	398.739	403.578	1.01214	0.0174035	0.932957	1
209	dd_Smed_v6_10209_0_1	218.557	216.171	220.944	1.02208	0.0315083	0.901917	1
210	dd_Smed_v6_1020_0_1	2417.9	2730.94	2104.86	0.770744	-0.375677	0.0921771	0.844208
211	dd_Smed_v6_10210_0_1	325.495	317.866	333.124	1.048	0.0676437	0.730745	0.993869
212	dd_Smed_v6_10211_0_1	202.522	200.762	204.283	1.01754	0.025088	0.901695	1
213	dd_Smed_v6_10212_0_1	182.543	183.196	181.89	0.99287	-0.0103233	0.978728	1
214	dd_Smed_v6_10214_0_1	954.084	1057.04	851.125	0.805194	-0.312591	0.0979545	0.844208
215	dd_Smed_v6_10215_0_1	198.641	196.265	201.018	1.02422	0.0345192	0.941761	1
216	dd_Smed_v6_10216_0_1	156.202	132.409	179.995	1.35939	0.442961	0.0462738	0.807435
217	dd_Smed_v6_10217_0_1	5.7685	5.98927	5.54773	0.926279	-0.110482	0.930264	1
218	dd_Smed_v6_10218_0_1	310.981	325.166	296.797	0.912755	-0.131701	0.508496	0.965871
219	dd_Smed_v6_10219_0_1	98.527	99.3728	97.6812	0.982978	-0.0247687	0.925532	1
220	dd_Smed_v6_1021_0_1	16848.7	14867.1	18830.2	1.26657	0.340925	0.0631037	0.832931
221	dd_Smed_v6_10220_0_1	387.894	416.008	359.78	0.864839	-0.209496	0.296756	0.922529
222	dd_Smed_v6_10221_0_1	317.124	328.424	305.823	0.931182	-0.102864	0.599794	0.978353
223	dd_Smed_v6_10222_0_1	251.804	243.455	260.153	1.06858	0.0957006	0.652939	0.985339
224	dd_Smed_v6_10223_0_1	162.835	152.657	173.014	1.13335	0.180593	0.410925	0.950573
225	dd_Smed_v6_10224_0_1	76.1069	84.1172	68.0967	0.809545	-0.304816	0.257371	0.908396
226	dd_Smed_v6_10225_0_1	239.112	254.817	223.407	0.876732	-0.189791	0.363299	0.93304
227	dd_Smed_v6_10226_0_1	187.686	204.684	170.688	0.83391	-0.262037	0.413893	0.951061
228	dd_Smed_v6_10227_0_1	8.78443	10.6127	6.95614	0.655453	-0.609437	0.332179	0.929132
229	dd_Smed_v6_10227_1_1	21.0622	15.5946	26.5297	1.70121	0.766559	0.101096	0.848514
230	dd_Smed_v6_10228_0_1	333.498	312.804	354.193	1.13232	0.179279	0.377129	0.938957
231	dd_Smed_v6_10229_0_1	143.427	149.229	137.625	0.922237	-0.116791	0.728702	0.993869
232	dd_Smed_v6_1022_0_1	4546.99	3881.05	5212.94	1.34318	0.425648	0.0216452	0.720169
233	dd_Smed_v6_10231_0_1	75.5802	73.887	77.2734	1.04583	0.0646519	0.8116	1
234	dd_Smed_v6_10232_0_1	185.239	198.5	171.977	0.866385	-0.20692	0.556417	0.972976
235	dd_Smed_v6_10233_0_1	356.685	373.238	340.132	0.9113	-0.134002	0.526217	0.968961
236	dd_Smed_v6_10235_0_1	286.668	316.36	256.977	0.812294	-0.299927	0.146808	0.860292
237	dd_Smed_v6_10236_0_1	351.311	358.126	344.495	0.961938	-0.0559839	0.777444	1
238	dd_Smed_v6_10237_0_1	206.883	231.556	182.21	0.786893	-0.34576	0.296084	0.921358
239	dd_Smed_v6_10238_0_1	94.3615	99.32	89.403	0.90015	-0.151762	0.547793	0.971902
240	dd_Smed_v6_10239_0_1	201.407	192.79	210.023	1.08939	0.12352	0.557225	0.973129
241	dd_Smed_v6_1023_0_1	4081.9	4119.87	4043.94	0.981569	-0.0268382	0.885312	1
242	dd_Smed_v6_10240_0_1	119.777	140.065	99.4886	0.710302	-0.493496	0.255981	0.906309
243	dd_Smed_v6_10241_0_1	150.02	188.19	111.849	0.594343	-0.750633	0.135972	0.858367
244	dd_Smed_v6_10242_0_1	40.0776	34.8295	45.3258	1.30136	0.380022	0.237436	0.891192
245	dd_Smed_v6_10243_0_1	306.023	303.696	308.35	1.01532	0.0219393	0.916316	1
246	dd_Smed_v6_10244_0_1	619.791	667.779	571.804	0.856277	-0.22385	0.262146	0.909157
247	dd_Smed_v6_10245_0_1	56.1501	52.0127	60.2875	1.15909	0.212994	0.534106	0.970519
248	dd_Smed_v6_10246_0_1	532.435	589.689	475.181	0.805817	-0.311476	0.24213	0.894857
249	dd_Smed_v6_10247_0_1	132.801	133.978	131.624	0.982431	-0.0255723	0.930228	1
250	dd_Smed_v6_10248_0_1	480.124	431.482	528.765	1.22546	0.293325	0.145779	0.860292
251	dd_Smed_v6_10249_0_1	721.549	767.572	675.525	0.88008	-0.184294	0.34638	0.929132
252	dd_Smed_v6_1024_0_1	4460.93	4146.06	4775.8	1.15189	0.204002	0.275541	0.913226
253	dd_Smed_v6_10250_0_1	152.65	131.935	173.366	1.31403	0.393994	0.204763	0.881256
254	dd_Smed_v6_10251_0_1	216.012	241.156	190.868	0.79147	-0.337394	0.111135	0.849478
255	dd_Smed_v6_10252_0_1	183.507	161.194	205.821	1.27685	0.352593	0.104338	0.848729
256	dd_Smed_v6_10253_0_1	186.747	164.89	208.605	1.26512	0.339271	0.118912	0.851131
257	dd_Smed_v6_10255_0_1	187.864	178.481	197.248	1.10515	0.144238	0.497435	0.965126
258	dd_Smed_v6_10256_0_1	54.9411	54.0948	55.7873	1.03129	0.0444451	0.851007	1
259	dd_Smed_v6_10257_0_1	442.969	470.621	415.318	0.882489	-0.180349	0.373464	0.937694
260	dd_Smed_v6_10258_0_1	50.3302	46.7281	53.9323	1.15417	0.206859	0.528594	0.968961
261	dd_Smed_v6_10259_0_1	708.907	669.116	748.698	1.11894	0.162127	0.405822	0.950255
262	dd_Smed_v6_1025_0_1	5442.25	5554.82	5329.68	0.959468	-0.0596934	0.756049	0.997743
263	dd_Smed_v6_10260_0_1	233.779	240.054	227.505	0.947727	-0.0774559	0.725735	0.993869
264	dd_Smed_v6_10261_0_1	51.1783	50.6845	51.672	1.01948	0.0278385	0.945655	1
265	dd_Smed_v6_10262_0_1	290.617	264.436	316.799	1.19802	0.26065	0.19862	0.877491
266	dd_Smed_v6_10263_0_1	218.188	207.811	228.566	1.09987	0.137339	0.536842	0.971807
267	dd_Smed_v6_10264_0_1	85.6715	85.6737	85.6693	0.999948	-7.46016e-05	1	1
268	dd_Smed_v6_10265_0_1	300.479	305.722	295.237	0.965704	-0.0503464	0.79152	1
269	dd_Smed_v6_10266_0_1	119.627	118.518	120.736	1.01871	0.0267447	0.906324	1
270	dd_Smed_v6_10267_0_1	213.089	214.689	211.489	0.985096	-0.021664	0.920037	1
271	dd_Smed_v6_10268_0_1	66.4056	85.2903	47.5208	0.557166	-0.843821	0.153909	0.861426
272	dd_Smed_v6_10269_0_1	147.153	142.669	151.637	1.06286	0.0879523	0.700116	0.989913
273	dd_Smed_v6_1026_0_1	4830.15	4312.63	5347.68	1.24	0.310345	0.0906514	0.844208
274	dd_Smed_v6_10270_0_1	127.769	132.049	123.488	0.935167	-0.0967044	0.703741	0.990196
275	dd_Smed_v6_10271_0_1	659.226	641.07	677.382	1.05664	0.0794872	0.698175	0.989199
276	dd_Smed_v6_10272_0_1	316.41	298.504	334.316	1.11997	0.163463	0.428774	0.954881
277	dd_Smed_v6_10273_0_1	224.793	222.898	226.689	1.01701	0.0243334	0.926258	1
278	dd_Smed_v6_10275_0_1	58.3492	53.7307	62.9677	1.17191	0.228864	0.423776	0.953792
279	dd_Smed_v6_10276_0_1	451.544	486.459	416.63	0.856455	-0.223551	0.250557	0.903117
280	dd_Smed_v6_10277_0_1	175.847	155.192	196.501	1.26618	0.340482	0.130945	0.85697
281	dd_Smed_v6_10278_0_1	189.233	192.235	186.231	0.968763	-0.0457841	0.836131	1
282	dd_Smed_v6_10279_0_1	262.959	268.549	257.368	0.958367	-0.0613496	0.772117	1
283	dd_Smed_v6_1027_0_1	11848.4	11828.5	11868.2	1.00335	0.00483038	0.971121	1
284	dd_Smed_v6_10280_0_1	309.592	316.507	302.676	0.956301	-0.0644628	0.738337	0.99503
285	dd_Smed_v6_10281_0_1	311.041	264.97	357.111	1.34774	0.430547	0.0374135	0.790024
286	dd_Smed_v6_10282_0_1	734.412	710.577	758.248	1.06709	0.0936789	0.623138	0.979737
287	dd_Smed_v6_10284_0_1	152.144	124.519	179.769	1.44371	0.529778	0.173929	0.862094
288	dd_Smed_v6_10285_0_1	82.0843	79.1387	85.0299	1.07444	0.103586	0.692776	0.989137
289	dd_Smed_v6_10286_0_1	970.49	1052.03	888.948	0.844982	-0.243007	0.30921	0.92509
290	dd_Smed_v6_10287_0_1	194.533	216.196	172.87	0.799598	-0.322653	0.160001	0.861426
291	dd_Smed_v6_10288_0_1	760.041	739.151	780.931	1.05652	0.0793253	0.661181	0.987744
292	dd_Smed_v6_10289_0_1	164.558	140.484	188.633	1.34274	0.425176	0.128825	0.856634
8500	dd_Smed_v6_2688_0_1	1576.27	2772.85	379.685	0.136929	-2.8685	1.01452e-26	1.74488e-22
294	dd_Smed_v6_10290_0_1	462.029	505.532	418.526	0.827893	-0.272484	0.164358	0.861426
295	dd_Smed_v6_10291_0_1	164.588	181.83	147.345	0.810348	-0.303387	0.158883	0.861426
296	dd_Smed_v6_10292_0_1	498.858	480.878	516.839	1.07478	0.104044	0.609114	0.978821
297	dd_Smed_v6_10293_0_1	284.368	313.503	255.234	0.814134	-0.296662	0.145024	0.860292
298	dd_Smed_v6_10294_0_1	381.05	362.56	399.54	1.102	0.14012	0.475983	0.962187
299	dd_Smed_v6_10295_0_1	68.3673	61.2148	75.5199	1.23369	0.302976	0.255442	0.906143
300	dd_Smed_v6_10296_0_1	76.7766	99.3194	54.2338	0.546055	-0.872882	0.101881	0.848514
301	dd_Smed_v6_10299_0_1	29.8164	34.1746	25.4582	0.744946	-0.424792	0.219812	0.882103
302	dd_Smed_v6_1029_0_1	1269.79	1438.46	1101.13	0.765493	-0.38554	0.101426	0.848514
303	dd_Smed_v6_1029_1_1	6372.76	5692.87	7052.65	1.23886	0.309008	0.0928909	0.844208
304	dd_Smed_v6_102_0_1	865.732	805.027	926.437	1.15081	0.202656	0.288323	0.917484
305	dd_Smed_v6_10301_0_1	108.789	124.574	93.0045	0.746578	-0.421634	0.106774	0.849478
306	dd_Smed_v6_10302_0_1	429.26	430.116	428.404	0.996021	-0.00575257	0.991969	1
307	dd_Smed_v6_10304_0_1	835.849	930.444	741.253	0.796665	-0.327954	0.0853839	0.844208
308	dd_Smed_v6_10305_0_1	19.6132	16.2254	23.001	1.41759	0.503441	0.231859	0.887547
309	dd_Smed_v6_10306_0_1	670.597	746.126	595.068	0.797544	-0.326365	0.089705	0.844208
310	dd_Smed_v6_10308_0_1	182.732	198.488	166.977	0.841246	-0.249401	0.232815	0.88815
311	dd_Smed_v6_10309_0_1	131.59	143.3	119.88	0.836568	-0.257445	0.426732	0.953792
312	dd_Smed_v6_1030_0_1	544.596	622.17	467.022	0.750634	-0.413819	0.418658	0.952505
313	dd_Smed_v6_10310_0_1	584.897	551.56	618.233	1.12088	0.164634	0.397333	0.94584
314	dd_Smed_v6_10311_0_1	127.631	140.696	114.566	0.814281	-0.296402	0.529059	0.968961
315	dd_Smed_v6_10312_0_1	176.584	167.396	185.772	1.10978	0.150269	0.503308	0.965707
316	dd_Smed_v6_10313_0_1	344.902	358.371	331.433	0.924833	-0.112735	0.606175	0.978821
317	dd_Smed_v6_10314_0_1	189.986	201.886	178.087	0.882116	-0.180959	0.556549	0.972976
318	dd_Smed_v6_10315_0_1	634.239	639.334	629.145	0.984064	-0.0231764	0.918793	1
319	dd_Smed_v6_10316_0_1	164.956	159.825	170.086	1.0642	0.0897724	0.713785	0.992485
320	dd_Smed_v6_10318_0_1	616.807	521.216	712.398	1.3668	0.4508	0.0464559	0.807435
321	dd_Smed_v6_10319_0_1	475.966	480.792	471.139	0.979923	-0.0292604	0.898232	1
322	dd_Smed_v6_1031_0_1	5030.07	5188.36	4871.78	0.938983	-0.0908283	0.617543	0.979737
323	dd_Smed_v6_10320_0_1	154.312	125.752	182.872	1.45423	0.540252	0.0155614	0.667071
324	dd_Smed_v6_10322_0_1	724.989	767.129	682.85	0.890137	-0.167901	0.381215	0.941082
325	dd_Smed_v6_10323_0_1	111.492	115.114	107.871	0.93708	-0.0937566	0.681061	0.98891
326	dd_Smed_v6_10324_0_1	151.497	139.27	163.724	1.17559	0.233384	0.291468	0.91846
327	dd_Smed_v6_10325_0_1	221.51	216.853	226.166	1.04295	0.0606641	0.785804	1
328	dd_Smed_v6_10326_0_1	52.2872	53.4155	51.1588	0.957751	-0.0622768	0.838625	1
329	dd_Smed_v6_10327_0_1	144.475	123.835	165.115	1.33335	0.415053	0.0677654	0.834023
330	dd_Smed_v6_10328_0_1	33.6754	34.4597	32.8912	0.954481	-0.0672113	0.899918	1
331	dd_Smed_v6_10329_0_1	28.3184	26.8564	29.7804	1.10887	0.149096	0.64382	0.984552
332	dd_Smed_v6_1032_0_1	4400.22	4314.73	4485.71	1.03963	0.0560657	0.748614	0.996389
333	dd_Smed_v6_10330_0_1	331.667	353.001	310.332	0.879124	-0.185861	0.353882	0.929607
334	dd_Smed_v6_10331_0_1	57.0908	53.8533	60.3284	1.12023	0.163801	0.549739	0.971902
335	dd_Smed_v6_10333_0_1	93.1772	114.083	72.2714	0.633498	-0.658587	0.154928	0.861426
336	dd_Smed_v6_10334_0_1	890.671	882.822	898.521	1.01778	0.0254305	0.891661	1
337	dd_Smed_v6_10335_0_1	74.1552	70.9148	77.3957	1.09139	0.126167	0.585939	0.976959
338	dd_Smed_v6_10336_0_1	97.8142	85.1623	110.466	1.29712	0.375316	0.11159	0.849478
339	dd_Smed_v6_10337_0_1	164.229	159.95	168.507	1.0535	0.0751942	0.745666	0.995303
340	dd_Smed_v6_10338_0_1	61.9379	61.285	62.5908	1.02131	0.0304168	0.931741	1
341	dd_Smed_v6_10339_0_1	268.823	225.842	311.804	1.38063	0.465326	0.12317	0.854458
342	dd_Smed_v6_1033_0_1	6348.09	5682.22	7013.96	1.23437	0.303773	0.0970466	0.844208
343	dd_Smed_v6_10340_0_1	128.71	120.901	136.518	1.12916	0.175255	0.529318	0.968961
344	dd_Smed_v6_10341_0_1	115.79	101.672	129.908	1.27771	0.353566	0.135229	0.858367
345	dd_Smed_v6_10342_0_1	346.329	351.605	341.052	0.969986	-0.0439647	0.8165	1
346	dd_Smed_v6_10343_0_1	507.411	564.801	450.022	0.796779	-0.327749	0.0935749	0.844208
347	dd_Smed_v6_10346_0_1	328.383	314.456	342.309	1.08858	0.122441	0.547355	0.971902
348	dd_Smed_v6_10347_0_1	279.299	292.241	266.357	0.91143	-0.133796	0.503228	0.965707
349	dd_Smed_v6_10348_0_1	301.204	315.798	286.61	0.907576	-0.13991	0.471354	0.961609
350	dd_Smed_v6_10349_0_1	196.011	194.956	197.065	1.01082	0.0155259	0.957196	1
351	dd_Smed_v6_1034_0_1	3192.87	3472.23	2913.5	0.839088	-0.253107	0.171336	0.862094
352	dd_Smed_v6_10350_0_1	132.504	132.693	132.315	0.997156	-0.00410842	0.959292	1
353	dd_Smed_v6_10351_0_1	151.189	182.122	120.256	0.660306	-0.598794	0.00858588	0.655775
354	dd_Smed_v6_10352_0_1	297.051	308.095	286.006	0.928305	-0.107329	0.613265	0.978821
355	dd_Smed_v6_10354_0_1	250.431	250.694	250.169	0.997907	-0.00302262	0.985528	1
356	dd_Smed_v6_10355_0_1	514.667	598.847	430.488	0.718861	-0.476216	0.0142264	0.667071
357	dd_Smed_v6_10356_0_1	451.654	516.328	386.981	0.749487	-0.416025	0.0349757	0.788364
358	dd_Smed_v6_10357_0_1	271.959	259.601	284.317	1.09521	0.131204	0.529091	0.968961
359	dd_Smed_v6_10359_0_1	249.611	234.34	264.882	1.13033	0.17675	0.399314	0.947223
360	dd_Smed_v6_1035_1_1	4406.9	4331.41	4482.39	1.03486	0.0494298	0.783495	1
361	dd_Smed_v6_10360_0_1	199.522	207.94	191.104	0.919036	-0.121807	0.583365	0.976959
362	dd_Smed_v6_10361_0_1	260.025	303.01	217.04	0.716279	-0.481406	0.0576182	0.827552
363	dd_Smed_v6_10362_1_1	129.425	128.669	130.181	1.01175	0.016849	0.924572	1
364	dd_Smed_v6_10363_0_1	52.9097	61.3465	44.4728	0.724945	-0.464057	0.201377	0.878193
365	dd_Smed_v6_10364_0_1	364.932	362.964	366.901	1.01085	0.0155636	0.919617	1
366	dd_Smed_v6_10365_0_1	216.208	218.452	213.963	0.97945	-0.0299569	0.903344	1
367	dd_Smed_v6_10366_0_1	265.255	250.125	280.385	1.12098	0.164758	0.431557	0.955995
368	dd_Smed_v6_10368_0_1	54.9821	65.522	44.4422	0.678279	-0.56005	0.346499	0.929132
369	dd_Smed_v6_10369_0_1	798.748	834.141	763.354	0.915139	-0.127938	0.505761	0.965707
370	dd_Smed_v6_1036_0_1	1861.36	1780.2	1942.51	1.09118	0.125887	0.50127	0.965145
371	dd_Smed_v6_10370_0_1	141.936	159.27	124.602	0.78233	-0.354151	0.119534	0.851131
372	dd_Smed_v6_10370_1_1	16.951	12.9492	20.9528	1.61808	0.694284	0.0902762	0.844208
373	dd_Smed_v6_10371_0_1	152.243	177.638	126.848	0.714082	-0.485839	0.0816632	0.844208
374	dd_Smed_v6_10372_0_1	258.203	267.55	248.857	0.930133	-0.104491	0.605568	0.978821
375	dd_Smed_v6_10373_0_1	562.213	609.159	515.267	0.845866	-0.241499	0.21284	0.882103
376	dd_Smed_v6_10374_0_1	498.156	494.414	501.899	1.01514	0.0216771	0.90033	1
377	dd_Smed_v6_10375_0_1	187.596	159.13	216.062	1.35777	0.441239	0.0883956	0.844208
378	dd_Smed_v6_10376_0_1	89.3439	94.1729	84.5149	0.897443	-0.156107	0.505117	0.965707
379	dd_Smed_v6_10377_0_1	241.566	228.436	254.695	1.11495	0.156981	0.437786	0.959658
380	dd_Smed_v6_10378_0_1	127.133	118.058	136.208	1.15374	0.206318	0.399916	0.947535
381	dd_Smed_v6_10379_0_1	284.282	333.105	235.46	0.706864	-0.500495	0.0701628	0.842284
382	dd_Smed_v6_1037_0_1	5660.31	5420.33	5900.3	1.08855	0.122407	0.498945	0.965145
383	dd_Smed_v6_10380_0_1	583.767	597.523	570.011	0.953957	-0.0680044	0.733781	0.994925
384	dd_Smed_v6_10381_0_1	23.1762	22.6038	23.7487	1.05065	0.0712791	0.9414	1
385	dd_Smed_v6_10382_0_1	386.018	427.436	344.6	0.806202	-0.310787	0.155904	0.861426
386	dd_Smed_v6_10386_0_1	190.095	200.489	179.701	0.896317	-0.15792	0.475123	0.962161
387	dd_Smed_v6_10387_0_1	509.834	510.185	509.483	0.998624	-0.00198628	0.999266	1
388	dd_Smed_v6_10388_0_1	254.041	273.472	234.609	0.85789	-0.221136	0.282619	0.917169
389	dd_Smed_v6_10389_0_1	6.72784	6.60774	6.84794	1.03635	0.0515127	1	1
390	dd_Smed_v6_1038_0_1	1552.27	1511.83	1592.71	1.0535	0.0751892	0.697342	0.989137
391	dd_Smed_v6_10390_0_1	73.7076	62.2133	85.2019	1.36951	0.453663	0.0601215	0.829945
392	dd_Smed_v6_10391_0_1	465.135	484.878	445.392	0.918565	-0.122547	0.646742	0.984567
393	dd_Smed_v6_10392_0_1	214.082	214.477	213.686	0.99631	-0.00533327	0.988433	1
394	dd_Smed_v6_10393_0_1	307.886	339.923	275.848	0.811501	-0.301335	0.145412	0.860292
395	dd_Smed_v6_10394_0_1	388.015	382.312	393.718	1.02984	0.0424146	0.839087	1
396	dd_Smed_v6_10395_0_1	175.456	181.88	169.032	0.929359	-0.105693	0.67237	0.988675
397	dd_Smed_v6_10396_0_1	190.719	212.796	168.643	0.79251	-0.3355	0.174049	0.862094
398	dd_Smed_v6_10397_0_1	174.878	153.148	196.608	1.28378	0.360399	0.0990215	0.847299
399	dd_Smed_v6_10398_0_1	438.004	417.426	458.581	1.09859	0.135654	0.4866	0.963083
400	dd_Smed_v6_10399_0_1	268.182	290.857	245.508	0.844084	-0.244541	0.239377	0.891716
401	dd_Smed_v6_1039_0_1	11857.6	13317.2	10398	0.780796	-0.356982	0.058589	0.828689
402	dd_Smed_v6_103_0_1	183.718	162.854	204.582	1.25623	0.329106	0.299584	0.923921
403	dd_Smed_v6_10400_0_1	245.216	243.579	246.854	1.01345	0.0192723	0.926754	1
404	dd_Smed_v6_10402_0_1	254.791	234.858	274.725	1.16975	0.226199	0.280062	0.91538
405	dd_Smed_v6_10403_0_1	181.854	213.53	150.178	0.703311	-0.507766	0.125606	0.855463
406	dd_Smed_v6_10404_0_1	96.084	103.833	88.335	0.850741	-0.233209	0.319566	0.928251
407	dd_Smed_v6_10405_0_1	257.708	275.397	240.019	0.871539	-0.198363	0.375669	0.938544
408	dd_Smed_v6_10406_0_1	527.361	537.27	517.452	0.963114	-0.054222	0.78191	1
409	dd_Smed_v6_10407_0_1	196.251	202.875	189.628	0.934704	-0.097419	0.662605	0.988334
410	dd_Smed_v6_10408_0_1	274.171	276.314	272.028	0.984489	-0.0225537	0.886035	1
411	dd_Smed_v6_10409_0_1	356.386	336.083	376.689	1.12082	0.164557	0.425291	0.953792
412	dd_Smed_v6_1040_0_1	1088.14	975.6	1200.68	1.23071	0.299492	0.112538	0.849478
413	dd_Smed_v6_10410_0_1	28.1807	31.2133	25.148	0.805685	-0.311713	0.444761	0.960203
414	dd_Smed_v6_10411_0_1	218.743	183.088	254.398	1.38949	0.474551	0.025522	0.741475
415	dd_Smed_v6_10412_0_1	220.102	203.688	236.516	1.16117	0.215578	0.317176	0.927702
416	dd_Smed_v6_10413_0_1	92.6489	85.6059	99.692	1.16455	0.219768	0.408305	0.950564
417	dd_Smed_v6_10414_0_1	139.398	129.236	149.56	1.15727	0.210722	0.405398	0.950255
418	dd_Smed_v6_10415_0_1	321.315	359.085	283.545	0.789632	-0.340747	0.0939472	0.844208
419	dd_Smed_v6_10417_0_1	194.94	203.892	185.989	0.912194	-0.132587	0.544702	0.971902
420	dd_Smed_v6_10418_0_1	99.5371	114.182	84.8924	0.743485	-0.427625	0.332257	0.929132
421	dd_Smed_v6_10419_0_1	258.056	286.049	230.064	0.80428	-0.31423	0.134513	0.858367
422	dd_Smed_v6_1041_0_1	3529.62	2918.9	4140.33	1.41846	0.504323	0.0102783	0.655775
423	dd_Smed_v6_10420_0_1	532.168	540.423	523.913	0.96945	-0.0447611	0.819725	1
424	dd_Smed_v6_10421_0_1	198.944	205.927	191.962	0.932188	-0.101308	0.640359	0.983886
425	dd_Smed_v6_10422_0_1	193.845	201.769	185.921	0.921455	-0.118014	0.577103	0.976959
426	dd_Smed_v6_10424_0_1	256.503	276.052	236.953	0.858363	-0.220341	0.280776	0.91556
427	dd_Smed_v6_10425_0_1	692.73	675.6	709.861	1.05071	0.071369	0.705064	0.990723
428	dd_Smed_v6_10426_0_1	412.084	422.556	401.612	0.950433	-0.0733426	0.728805	0.993869
429	dd_Smed_v6_10427_0_1	223.636	228.319	218.953	0.958978	-0.0604298	0.794654	1
430	dd_Smed_v6_10428_0_1	147.886	165.874	129.898	0.783112	-0.352709	0.239025	0.891716
431	dd_Smed_v6_10429_0_1	215.127	272.815	157.439	0.577088	-0.793136	0.0331159	0.777849
432	dd_Smed_v6_10431_0_1	472.565	483.306	461.823	0.95555	-0.0655962	0.739991	0.99503
433	dd_Smed_v6_10434_0_1	215.092	185.505	244.679	1.31898	0.399428	0.0738502	0.844208
434	dd_Smed_v6_10435_0_1	491.539	503.326	479.752	0.953164	-0.0692032	0.735709	0.994925
435	dd_Smed_v6_10436_0_1	65.8651	59.6708	72.0593	1.20761	0.272161	0.271691	0.911056
436	dd_Smed_v6_10437_0_1	350.392	388.646	312.138	0.803142	-0.316273	0.112824	0.849478
437	dd_Smed_v6_10438_0_1	189.44	186.926	191.955	1.0269	0.0383007	0.828543	1
438	dd_Smed_v6_10439_0_1	33.1117	33.1425	33.0808	0.99814	-0.00268623	0.982108	1
439	dd_Smed_v6_1043_0_1	177.517	197.849	157.184	0.794464	-0.331946	0.497173	0.965126
440	dd_Smed_v6_10440_0_1	109.963	134.598	85.3278	0.633948	-0.657564	0.128438	0.856634
441	dd_Smed_v6_10441_0_1	135.893	138.725	133.062	0.959181	-0.0601244	0.791027	1
442	dd_Smed_v6_10442_0_1	162.78	172.554	153.007	0.886719	-0.173452	0.42241	0.953792
443	dd_Smed_v6_10443_0_1	67.1215	56.346	77.8971	1.38248	0.467256	0.0638925	0.832931
444	dd_Smed_v6_10444_0_1	454.042	465.614	442.47	0.950294	-0.0735543	0.706062	0.991224
445	dd_Smed_v6_10445_0_1	164.767	146.562	182.972	1.24843	0.320112	0.268778	0.910799
446	dd_Smed_v6_10446_0_1	302.883	347.382	258.383	0.743803	-0.427008	0.15558	0.861426
447	dd_Smed_v6_10447_0_1	186.672	190.658	182.687	0.958191	-0.0616143	0.763367	0.999686
448	dd_Smed_v6_10448_0_1	132.924	126.749	139.099	1.09743	0.134133	0.694143	0.989137
449	dd_Smed_v6_10449_0_1	217.536	236.083	198.988	0.842875	-0.246609	0.243723	0.8976
450	dd_Smed_v6_1044_0_1	6645.33	6970.7	6319.97	0.906647	-0.141387	0.444753	0.960203
451	dd_Smed_v6_10450_0_1	48.9359	50.1097	47.7621	0.953151	-0.0692227	0.894175	1
452	dd_Smed_v6_10453_0_1	188.618	173.876	203.36	1.16957	0.225975	0.289266	0.917484
453	dd_Smed_v6_10454_0_1	527.192	524.001	530.383	1.01218	0.0174629	0.937342	1
454	dd_Smed_v6_10456_0_1	128.534	136.547	120.521	0.882634	-0.180113	0.499154	0.965145
455	dd_Smed_v6_10458_0_1	375.517	365.165	385.87	1.0567	0.0795667	0.686816	0.989012
456	dd_Smed_v6_10459_1_1	391.477	402.859	380.094	0.943492	-0.0839177	0.697287	0.989137
457	dd_Smed_v6_1045_0_1	955.983	916.484	995.482	1.0862	0.119285	0.53637	0.971772
458	dd_Smed_v6_10460_0_1	896.731	882.105	911.357	1.03316	0.047067	0.807842	1
459	dd_Smed_v6_10462_0_1	254.806	241.039	268.573	1.11423	0.156049	0.464326	0.96106
460	dd_Smed_v6_10464_0_1	333.718	369.867	297.57	0.804532	-0.313778	0.118815	0.851131
461	dd_Smed_v6_10465_0_2	238.229	225.333	251.126	1.11447	0.156358	0.454974	0.960203
462	dd_Smed_v6_10466_0_1	74.4349	75.6487	73.2211	0.967909	-0.0470571	0.886608	1
463	dd_Smed_v6_10467_0_1	246.264	256.214	236.314	0.922333	-0.11664	0.573793	0.976959
464	dd_Smed_v6_10468_0_1	414.444	444.853	384.036	0.863287	-0.212087	0.286276	0.917484
465	dd_Smed_v6_10469_0_1	439.92	390.371	489.469	1.25386	0.326373	0.107462	0.849478
466	dd_Smed_v6_1046_0_1	2958.4	2966.08	2950.71	0.994817	-0.00749659	0.969936	1
467	dd_Smed_v6_10471_0_1	216.02	233.938	198.102	0.846815	-0.239881	0.267694	0.910798
468	dd_Smed_v6_10472_0_1	332.376	308.963	355.789	1.15156	0.203587	0.31415	0.925818
469	dd_Smed_v6_10473_0_1	492.989	469.564	516.413	1.09977	0.137205	0.493171	0.964963
470	dd_Smed_v6_10474_0_1	500.01	470.227	529.794	1.12668	0.172074	0.368695	0.934727
471	dd_Smed_v6_10476_1_1	9.75656	10.6188	8.89433	0.837603	-0.255661	0.682377	0.988947
472	dd_Smed_v6_10477_0_1	25.3076	20.316	30.2991	1.49139	0.576654	0.104242	0.848729
473	dd_Smed_v6_10478_0_1	161.249	165.186	157.312	0.952331	-0.0704657	0.735346	0.994925
474	dd_Smed_v6_10479_0_1	367.276	346.252	388.301	1.12144	0.165355	0.420468	0.952577
475	dd_Smed_v6_1047_0_1	1517.57	1371.86	1663.27	1.21241	0.277882	0.131546	0.858363
476	dd_Smed_v6_10480_0_1	214.42	199.652	229.188	1.14794	0.199046	0.351089	0.929132
477	dd_Smed_v6_10481_0_1	368.308	343.665	392.95	1.14341	0.193342	0.336115	0.929132
478	dd_Smed_v6_10482_0_1	282.462	282.175	282.749	1.00203	0.00292959	1	1
479	dd_Smed_v6_10483_0_1	93.4562	80.2477	106.665	1.32919	0.410552	0.095782	0.844208
480	dd_Smed_v6_10484_0_1	8.42816	6.63834	10.218	1.53924	0.622216	0.405963	0.950255
481	dd_Smed_v6_10485_0_1	552.358	594.866	509.851	0.857086	-0.222489	0.44314	0.960203
482	dd_Smed_v6_10486_0_10	496.216	454.781	537.651	1.18222	0.241497	0.400969	0.9482
483	dd_Smed_v6_10487_0_2	110.081	105.084	115.079	1.09512	0.13109	0.612625	0.978821
484	dd_Smed_v6_10489_0_1	108.066	95.9219	120.21	1.25321	0.325631	0.163135	0.861426
485	dd_Smed_v6_1048_0_1	3292.93	3050.99	3534.87	1.1586	0.212379	0.249545	0.901854
486	dd_Smed_v6_10490_0_1	86.7664	106.15	67.3825	0.634785	-0.65566	0.044109	0.807435
487	dd_Smed_v6_10491_0_1	9.63605	7.62733	11.6448	1.52672	0.610434	0.309663	0.925449
488	dd_Smed_v6_10491_1_1	142.869	154.01	131.729	0.855329	-0.225448	0.316031	0.926321
489	dd_Smed_v6_10493_0_1	463.459	561.441	365.476	0.650962	-0.619355	0.0142056	0.667071
490	dd_Smed_v6_10495_0_1	85.3154	81.9769	88.6538	1.08145	0.112966	0.668556	0.988675
491	dd_Smed_v6_10497_0_1	201.488	178.656	224.321	1.2556	0.32838	0.132242	0.858367
492	dd_Smed_v6_10498_0_1	196.138	196.605	195.672	0.995254	-0.00686384	0.995786	1
493	dd_Smed_v6_10499_0_1	916.024	866.68	965.368	1.11387	0.15558	0.409329	0.950568
494	dd_Smed_v6_1049_0_1	2016.72	1892.58	2140.87	1.13119	0.177843	0.340332	0.929132
495	dd_Smed_v6_104_0_1	10407	11033	9780.98	0.886519	-0.173776	0.350083	0.929132
496	dd_Smed_v6_10500_0_1	227.755	217.775	237.734	1.09165	0.12651	0.552969	0.972146
497	dd_Smed_v6_10501_0_1	121.195	127.704	114.687	0.898069	-0.155102	0.597117	0.977433
498	dd_Smed_v6_10502_0_1	24.0311	33.4276	14.6347	0.437802	-1.19165	0.0263371	0.748244
499	dd_Smed_v6_10504_0_1	584.882	586.974	582.789	0.992869	-0.0103248	0.967781	1
500	dd_Smed_v6_10506_0_1	175.635	189.608	161.661	0.852609	-0.230044	0.283641	0.917169
501	dd_Smed_v6_10507_0_1	84.8547	87.3307	82.3787	0.943296	-0.0842183	0.817897	1
502	dd_Smed_v6_10508_0_1	306.802	311.773	301.832	0.968115	-0.04675	0.823245	1
503	dd_Smed_v6_10509_0_1	586.261	614.559	557.964	0.907909	-0.139381	0.480727	0.962187
504	dd_Smed_v6_1050_0_1	4315.5	4161.94	4469.06	1.07379	0.102715	0.571575	0.976738
505	dd_Smed_v6_10510_0_1	308.037	293.968	322.107	1.09572	0.131882	0.519453	0.96745
506	dd_Smed_v6_10511_0_1	183.747	167.195	200.299	1.198	0.260628	0.230607	0.886658
507	dd_Smed_v6_10513_0_1	68.5283	80.0362	57.0203	0.712432	-0.489176	0.299393	0.923921
508	dd_Smed_v6_10514_0_1	62.763	62.6075	62.9186	1.00497	0.00715207	1	1
509	dd_Smed_v6_10515_0_1	292.389	311.172	273.607	0.879279	-0.185606	0.380801	0.940747
510	dd_Smed_v6_10516_0_1	259.506	230.988	288.023	1.24692	0.318366	0.137012	0.858367
511	dd_Smed_v6_10517_0_1	312.152	287.84	336.464	1.16893	0.225186	0.265274	0.910359
512	dd_Smed_v6_10518_0_1	746.863	779.943	713.784	0.915175	-0.12788	0.521552	0.96745
513	dd_Smed_v6_10519_0_1	52.6877	58.7986	46.5769	0.792144	-0.336166	0.434319	0.95847
514	dd_Smed_v6_1051_0_1	1034.78	1151.01	918.559	0.798047	-0.325454	0.454071	0.960203
515	dd_Smed_v6_10520_0_1	23.7161	28.1793	19.253	0.683231	-0.549556	0.469167	0.96106
516	dd_Smed_v6_10521_0_1	359.024	325.235	392.812	1.20778	0.272357	0.266231	0.910675
517	dd_Smed_v6_10522_0_1	743.635	745.736	741.533	0.994364	-0.00815475	0.964579	1
518	dd_Smed_v6_10523_0_1	587.304	679.873	494.736	0.727689	-0.458606	0.0433213	0.807435
519	dd_Smed_v6_10524_0_1	144.802	146.611	142.993	0.975317	-0.0360572	0.857137	1
520	dd_Smed_v6_10525_0_1	155.449	140.933	169.964	1.20599	0.270215	0.216548	0.882103
521	dd_Smed_v6_10526_0_1	634.878	734.267	535.489	0.729283	-0.455449	0.0191623	0.675354
522	dd_Smed_v6_10527_0_1	206.799	194.843	218.755	1.12272	0.167003	0.473122	0.961731
523	dd_Smed_v6_10529_0_1	314.47	325.729	303.21	0.930865	-0.103356	0.614568	0.979191
524	dd_Smed_v6_1052_0_1	3202.08	2496.52	3907.64	1.56523	0.646377	0.00236536	0.469119
525	dd_Smed_v6_10530_0_1	321.599	327.15	316.047	0.966063	-0.0498108	0.801764	1
526	dd_Smed_v6_10531_0_1	13.7155	15.3036	12.1273	0.792449	-0.33561	0.644681	0.984567
527	dd_Smed_v6_10532_0_1	606.984	672.613	541.354	0.804853	-0.313203	0.106902	0.849478
528	dd_Smed_v6_10533_0_1	16.622	21.293	11.951	0.561264	-0.833249	0.196644	0.876992
529	dd_Smed_v6_10534_0_1	118.884	116.994	120.774	1.03231	0.0458727	0.840916	1
530	dd_Smed_v6_10535_0_1	41.9311	49.3917	34.4705	0.697901	-0.518905	0.164846	0.861426
531	dd_Smed_v6_10536_0_1	214.122	244.052	184.193	0.754728	-0.405972	0.0648673	0.832931
532	dd_Smed_v6_10539_0_1	76.4697	75.3154	77.624	1.03065	0.0435564	0.949265	1
533	dd_Smed_v6_1053_0_1	7009.91	6520.05	7499.77	1.15026	0.201962	0.268949	0.910799
534	dd_Smed_v6_10540_0_1	333.274	298.179	368.369	1.23539	0.304971	0.191698	0.871993
535	dd_Smed_v6_10541_0_1	68.4252	71.2912	65.5591	0.919595	-0.120929	0.682232	0.988947
536	dd_Smed_v6_10542_0_1	131.048	122.377	139.719	1.1417	0.19119	0.396358	0.945419
537	dd_Smed_v6_10543_0_1	323.782	287.54	360.023	1.25208	0.324328	0.112204	0.849478
538	dd_Smed_v6_10544_0_1	448.501	416.725	480.277	1.1525	0.20477	0.302464	0.923921
539	dd_Smed_v6_10545_0_1	28.707	26.2497	31.1643	1.18722	0.24759	0.580218	0.976959
540	dd_Smed_v6_10546_0_1	165.392	155.186	175.598	1.13153	0.17828	0.422191	0.953792
541	dd_Smed_v6_10547_0_1	293.868	284.437	303.298	1.06631	0.0926265	0.665085	0.988675
542	dd_Smed_v6_10548_0_1	16.8279	19.2105	14.4453	0.75195	-0.411291	0.375418	0.93829
543	dd_Smed_v6_1054_0_1	13639.7	12150.4	15128.9	1.24514	0.316304	0.131971	0.858363
544	dd_Smed_v6_10551_0_1	279.203	266.083	292.323	1.09862	0.135687	0.506911	0.965707
545	dd_Smed_v6_10553_0_10	21.4547	16.8684	26.041	1.54377	0.626462	0.112134	0.849478
546	dd_Smed_v6_10554_0_1	17.3737	20.916	13.8315	0.661287	-0.596651	0.347727	0.929132
547	dd_Smed_v6_10555_0_1	446.543	479.711	413.376	0.861719	-0.214711	0.275165	0.912742
548	dd_Smed_v6_10556_0_1	51.4162	50.4737	52.3587	1.03735	0.0528995	0.947047	1
549	dd_Smed_v6_10557_0_1	207.678	190.811	224.545	1.17679	0.234858	0.269134	0.910799
550	dd_Smed_v6_10558_1_1	78.0599	92.8748	63.245	0.680971	-0.554335	0.165548	0.861426
551	dd_Smed_v6_1055_0_1	1079.25	1213.59	944.905	0.778603	-0.361041	0.485927	0.962757
552	dd_Smed_v6_10560_0_1	102.219	84.2775	120.161	1.42578	0.511755	0.03307	0.777849
553	dd_Smed_v6_10561_0_1	102.393	96.7088	108.077	1.11755	0.160341	0.491639	0.964963
554	dd_Smed_v6_10562_0_1	385.514	394.025	377.002	0.956798	-0.0637131	0.752881	0.996389
555	dd_Smed_v6_10564_0_1	223.124	222.285	223.964	1.00755	0.0108535	0.969871	1
556	dd_Smed_v6_10565_0_1	189.808	174.863	204.754	1.17094	0.227662	0.323942	0.928833
557	dd_Smed_v6_10566_0_1	154.404	134.208	174.599	1.30096	0.379573	0.113574	0.849478
558	dd_Smed_v6_10567_0_1	714.7	706.789	722.612	1.02239	0.0319414	0.867486	1
559	dd_Smed_v6_10568_0_1	75.9728	82.7081	69.2375	0.837131	-0.256474	0.653576	0.985339
560	dd_Smed_v6_10569_0_1	202.572	210.977	194.168	0.920327	-0.119782	0.591213	0.976959
561	dd_Smed_v6_1056_0_1	309.718	283.31	336.125	1.18642	0.246616	0.497899	0.965145
562	dd_Smed_v6_10570_0_1	173.49	167.923	179.058	1.06631	0.092628	0.66963	0.988675
563	dd_Smed_v6_10571_0_1	69.3223	64.1204	74.5241	1.16225	0.216923	0.434569	0.95847
564	dd_Smed_v6_10573_0_1	134.318	155.629	113.007	0.726134	-0.461692	0.177705	0.866457
565	dd_Smed_v6_10574_0_1	154.037	152.329	155.745	1.02242	0.0319923	0.913837	1
566	dd_Smed_v6_10575_0_1	471.48	529.442	413.518	0.781046	-0.35652	0.070495	0.842838
567	dd_Smed_v6_10576_0_1	267.599	272.915	262.282	0.96104	-0.0573318	0.805778	1
568	dd_Smed_v6_10577_0_1	150.186	145.962	154.409	1.05787	0.0811602	0.715379	0.99251
569	dd_Smed_v6_10578_0_1	8.74957	7.63965	9.85948	1.29057	0.368005	0.464967	0.96106
570	dd_Smed_v6_10579_0_1	68.7013	83.379	54.0236	0.647927	-0.626096	0.183051	0.868644
571	dd_Smed_v6_10581_0_1	214.671	244.728	184.614	0.754363	-0.40667	0.266031	0.910359
572	dd_Smed_v6_10582_0_1	424.496	471.35	377.641	0.801191	-0.319782	0.110916	0.849478
573	dd_Smed_v6_10583_0_1	212.637	196.546	228.727	1.16373	0.218758	0.303514	0.923921
574	dd_Smed_v6_10585_0_1	756.323	741.609	771.036	1.03968	0.0561398	0.780077	1
575	dd_Smed_v6_10586_0_1	212.973	207.796	218.149	1.04983	0.070149	0.751966	0.996389
576	dd_Smed_v6_10587_0_1	331.336	333.687	328.985	0.985908	-0.0204745	0.926951	1
577	dd_Smed_v6_10589_0_1	44.2511	45.0414	43.4607	0.964907	-0.0515387	0.9345	1
578	dd_Smed_v6_1058_0_1	1454.07	1290.85	1617.29	1.25289	0.325254	0.127935	0.856547
579	dd_Smed_v6_10590_2_1	106.43	107.045	105.815	0.988509	-0.0166735	0.970358	1
580	dd_Smed_v6_10591_0_1	606.024	582.945	629.104	1.07918	0.109939	0.568935	0.975756
581	dd_Smed_v6_10592_0_1	322.127	361.116	283.138	0.784064	-0.350957	0.143195	0.860292
582	dd_Smed_v6_10593_0_1	572.543	583.335	561.751	0.962998	-0.0543949	0.77849	1
583	dd_Smed_v6_10595_0_1	566.779	576.952	556.606	0.964736	-0.0517945	0.805701	1
584	dd_Smed_v6_10596_0_1	75.9372	83.2637	68.6107	0.824017	-0.279254	0.446415	0.960203
585	dd_Smed_v6_10598_0_1	101.387	100.297	102.478	1.02175	0.0310384	0.901784	1
586	dd_Smed_v6_10599_0_1	50.6511	48.256	53.0461	1.09926	0.136538	0.766543	0.999913
587	dd_Smed_v6_1059_0_1	698.693	714.259	683.127	0.956415	-0.0642919	0.761747	0.999216
588	dd_Smed_v6_105_0_1	6246.16	5927.6	6564.71	1.10748	0.147284	0.403157	0.949661
589	dd_Smed_v6_10601_0_1	479.157	543.593	414.72	0.762924	-0.390389	0.0587911	0.828689
590	dd_Smed_v6_10602_0_1	695.46	780.877	610.043	0.781228	-0.356184	0.134783	0.858367
591	dd_Smed_v6_10603_0_1	24.9871	24.2592	25.7151	1.06001	0.0840802	0.883049	1
592	dd_Smed_v6_10604_0_1	102.526	106.668	98.3839	0.922333	-0.11664	0.638772	0.983373
593	dd_Smed_v6_10605_0_1	85.181	79.6351	90.727	1.13928	0.188128	0.47366	0.961803
594	dd_Smed_v6_10607_0_1	136.527	145.926	127.127	0.871176	-0.198964	0.385428	0.942285
595	dd_Smed_v6_10608_0_1	209.856	216.519	203.193	0.938452	-0.0916452	0.669797	0.988675
596	dd_Smed_v6_10609_0_1	100.836	105.558	96.1138	0.910532	-0.135219	0.598763	0.978037
597	dd_Smed_v6_1060_0_1	5845.82	5366.83	6324.82	1.1785	0.236955	0.192219	0.872476
598	dd_Smed_v6_10610_0_1	427.522	456.115	398.929	0.874624	-0.193265	0.332873	0.929132
599	dd_Smed_v6_10611_0_1	82.5218	82.2438	82.7999	1.00676	0.00972188	0.98401	1
600	dd_Smed_v6_10612_0_1	64.4105	61.2786	67.5423	1.10222	0.140407	0.606575	0.978821
601	dd_Smed_v6_10613_0_1	235.537	246.806	224.269	0.908686	-0.138146	0.497364	0.965126
602	dd_Smed_v6_10614_0_1	221.041	202.315	239.767	1.18512	0.24503	0.24822	0.90034
603	dd_Smed_v6_10615_0_1	362.841	332.848	392.834	1.18022	0.239057	0.229333	0.886658
604	dd_Smed_v6_10616_0_1	37.7255	39.8419	35.6091	0.893762	-0.162038	0.653869	0.985437
605	dd_Smed_v6_10617_0_1	108.676	103.209	114.143	1.10594	0.145275	0.525647	0.968961
606	dd_Smed_v6_10618_0_1	57.4383	66.2596	48.6169	0.733733	-0.446673	0.105241	0.849478
607	dd_Smed_v6_10619_0_1	52.3556	54.7317	49.9794	0.913171	-0.131043	0.705734	0.991093
608	dd_Smed_v6_1061_0_1	6199.49	6788.29	5610.69	0.826525	-0.274869	0.328105	0.929132
609	dd_Smed_v6_10620_0_1	447.456	519.261	375.652	0.723435	-0.467065	0.158279	0.861426
610	dd_Smed_v6_10621_0_1	43.9002	51.1647	36.6356	0.716033	-0.481902	0.110615	0.849478
611	dd_Smed_v6_10622_0_1	75.7614	80.9704	70.5524	0.871336	-0.198699	0.409752	0.950568
612	dd_Smed_v6_10623_0_1	25.4026	26.8009	24.0044	0.895654	-0.158987	0.741545	0.99503
613	dd_Smed_v6_10624_0_1	264.188	276.437	251.94	0.911384	-0.133869	0.632029	0.981709
614	dd_Smed_v6_10625_0_1	1211.69	1426.35	997.02	0.699	-0.516635	0.00607275	0.600681
615	dd_Smed_v6_10626_0_1	25.609	27.5111	23.7068	0.861719	-0.214711	0.605175	0.978821
616	dd_Smed_v6_10627_0_1	456.121	397.965	514.277	1.29227	0.369903	0.0648112	0.832931
617	dd_Smed_v6_10628_0_1	140	143.455	136.545	0.951831	-0.0712231	0.757803	0.997814
618	dd_Smed_v6_10629_0_1	335.401	318.602	352.201	1.10546	0.144644	0.500959	0.965145
619	dd_Smed_v6_1062_0_1	10835.4	10683.5	10987.2	1.02842	0.0404317	0.80355	1
620	dd_Smed_v6_10630_0_2	145.886	129.69	162.083	1.24977	0.321667	0.167474	0.862094
621	dd_Smed_v6_10631_0_1	146.958	147.928	145.988	0.986885	-0.0190461	0.954673	1
622	dd_Smed_v6_10632_0_1	414.163	434.722	393.604	0.905415	-0.143349	0.484671	0.962577
623	dd_Smed_v6_10633_0_1	3089.73	3664.3	2515.16	0.686396	-0.542888	0.00399559	0.591843
624	dd_Smed_v6_10635_0_1	486.881	480.395	493.367	1.027	0.0384378	0.826166	1
625	dd_Smed_v6_10636_0_1	76.911	74.3074	79.5146	1.07008	0.0977134	0.712929	0.992452
626	dd_Smed_v6_10637_0_1	272.588	311.032	234.144	0.752798	-0.409666	0.0460631	0.807435
627	dd_Smed_v6_10638_0_1	526.488	548.277	504.699	0.920519	-0.119481	0.557958	0.973357
628	dd_Smed_v6_10639_0_10	50.9502	43.9845	57.9158	1.31673	0.396961	0.414969	0.951598
629	dd_Smed_v6_1063_0_1	2117	1983.82	2250.18	1.13427	0.181758	0.331464	0.929132
630	dd_Smed_v6_10640_0_1	682.992	727.869	638.115	0.876689	-0.189863	0.307592	0.924271
631	dd_Smed_v6_10642_0_1	104.803	106.855	102.751	0.961587	-0.0565114	0.795904	1
632	dd_Smed_v6_10644_0_1	55.7462	59.806	51.6865	0.864235	-0.210504	0.454524	0.960203
633	dd_Smed_v6_10645_0_1	220.14	235.359	204.922	0.870678	-0.199789	0.380193	0.940747
634	dd_Smed_v6_10646_0_1	100.788	109.307	92.268	0.844116	-0.244486	0.50139	0.965145
635	dd_Smed_v6_10647_0_1	480.362	454.381	506.344	1.11436	0.156215	0.42761	0.954407
636	dd_Smed_v6_10650_0_1	80.777	73.1743	88.3797	1.2078	0.272377	0.271278	0.910799
637	dd_Smed_v6_10651_0_1	197.881	198.081	197.682	0.997985	-0.00291067	0.978034	1
638	dd_Smed_v6_10653_0_1	268.303	286.275	250.331	0.874441	-0.193567	0.354865	0.929607
639	dd_Smed_v6_10654_1_1	57.085	60.7634	53.4065	0.878924	-0.186189	0.55913	0.97341
640	dd_Smed_v6_10655_0_1	345.489	333.692	357.285	1.0707	0.0985591	0.659407	0.987034
641	dd_Smed_v6_10656_0_1	319.124	324.457	313.792	0.967131	-0.048216	0.837577	1
642	dd_Smed_v6_10657_0_1	164.583	170.051	159.115	0.935692	-0.095895	0.675108	0.98891
643	dd_Smed_v6_10658_0_1	85.5924	97.8516	73.3332	0.749433	-0.41613	0.0910746	0.844208
644	dd_Smed_v6_10659_0_1	9.60806	9.64807	9.56805	0.991707	-0.0120148	1	1
645	dd_Smed_v6_1065_0_1	5331.64	4420.21	6243.06	1.41239	0.498137	0.0376585	0.790024
646	dd_Smed_v6_10660_0_1	285.509	283.306	287.711	1.01555	0.0222578	0.905786	1
647	dd_Smed_v6_10661_0_1	249.259	263.015	235.503	0.895399	-0.159398	0.537573	0.971807
648	dd_Smed_v6_10662_0_1	193.266	190.386	196.146	1.03025	0.0429983	0.840552	1
649	dd_Smed_v6_10663_0_1	48.7801	50.8195	46.7407	0.919739	-0.120703	0.837064	1
650	dd_Smed_v6_10664_0_1	5.97288	5.63088	6.31488	1.12147	0.165396	0.882911	1
651	dd_Smed_v6_10665_0_1	93.3652	92.5601	94.1702	1.0174	0.0248814	0.907734	1
652	dd_Smed_v6_10666_0_1	240.645	244.061	237.229	0.972006	-0.0409631	0.852317	1
653	dd_Smed_v6_10667_0_1	578.156	544.589	611.722	1.12327	0.167708	0.389376	0.943264
654	dd_Smed_v6_10669_0_1	169.1	134.042	204.158	1.52309	0.607005	0.0627637	0.832931
655	dd_Smed_v6_1066_0_1	219.819	219.652	219.985	1.00152	0.00218619	0.971444	1
656	dd_Smed_v6_10670_0_1	693.598	708.297	678.9	0.958496	-0.0611556	0.767608	0.999913
657	dd_Smed_v6_10671_0_1	226.094	270.543	181.645	0.67141	-0.574735	0.0137348	0.667071
658	dd_Smed_v6_10672_0_1	270.91	271.593	270.226	0.994969	-0.00727643	0.979285	1
659	dd_Smed_v6_10673_0_1	307.147	298.839	315.455	1.0556	0.0780667	0.714511	0.99251
660	dd_Smed_v6_10674_0_1	253.711	291.213	216.209	0.742441	-0.429652	0.229002	0.886658
661	dd_Smed_v6_10675_0_1	116.823	110.132	123.514	1.12151	0.16544	0.478285	0.962187
662	dd_Smed_v6_10676_0_1	318.552	291.313	345.792	1.18701	0.247332	0.283518	0.917169
663	dd_Smed_v6_10677_0_1	518.885	605.215	432.555	0.714713	-0.484563	0.16557	0.861426
664	dd_Smed_v6_10678_0_1	43.1042	45.448	40.7605	0.896861	-0.157044	0.628844	0.979888
665	dd_Smed_v6_1067_0_1	1150.48	1267.93	1033.02	0.81473	-0.295606	0.416396	0.951598
666	dd_Smed_v6_10681_0_1	256.339	245.732	266.946	1.08633	0.119464	0.567966	0.975675
667	dd_Smed_v6_10682_0_1	549.951	600.932	498.97	0.830328	-0.268247	0.289551	0.917484
668	dd_Smed_v6_10683_0_1	356.94	321.266	392.615	1.22209	0.28935	0.156193	0.861426
669	dd_Smed_v6_10684_0_1	352.49	338.449	366.531	1.08297	0.114996	0.565914	0.97556
670	dd_Smed_v6_10685_0_1	189.75	263.589	115.912	0.439744	-1.18526	0.00269085	0.493191
671	dd_Smed_v6_10687_0_1	268.793	258.462	279.123	1.07994	0.110951	0.608942	0.978821
672	dd_Smed_v6_10688_0_1	402.79	409.389	396.191	0.967761	-0.0472771	0.789316	1
673	dd_Smed_v6_10689_0_1	227.244	220.209	234.28	1.0639	0.089365	0.680899	0.98891
674	dd_Smed_v6_1068_0_1	4900.07	4233.05	5567.08	1.31515	0.395223	0.0327333	0.777849
675	dd_Smed_v6_10690_0_1	31.286	27.2885	35.2835	1.29298	0.370698	0.586304	0.976959
676	dd_Smed_v6_10691_0_1	503.183	498.69	507.676	1.01802	0.0257646	0.907469	1
677	dd_Smed_v6_10693_0_1	264.136	250.898	277.374	1.10552	0.14473	0.476495	0.962187
678	dd_Smed_v6_10696_0_1	1707.69	2228.85	1186.53	0.532352	-0.909547	0.00359967	0.569507
679	dd_Smed_v6_10698_0_1	215.507	239.371	191.643	0.80061	-0.320828	0.163768	0.861426
680	dd_Smed_v6_10699_0_1	187.961	229.944	145.979	0.634849	-0.655516	0.147762	0.860292
681	dd_Smed_v6_1069_0_1	2574.16	2142.26	3006.05	1.40321	0.488731	0.0498218	0.821558
682	dd_Smed_v6_106_0_1	4751.63	4300.7	5202.57	1.2097	0.274653	0.133326	0.858367
683	dd_Smed_v6_10700_0_1	321.108	311.989	330.227	1.05846	0.0819622	0.688725	0.989137
684	dd_Smed_v6_10703_0_1	245.043	221.994	268.091	1.20765	0.272201	0.206254	0.882103
685	dd_Smed_v6_10704_0_1	432.246	469.732	394.76	0.840395	-0.25086	0.202773	0.879296
686	dd_Smed_v6_10707_0_1	336.45	323.806	349.094	1.0781	0.108489	0.595756	0.977433
687	dd_Smed_v6_10708_0_1	243.652	280.758	206.546	0.735671	-0.442868	0.219957	0.882103
688	dd_Smed_v6_10709_0_1	57.9072	56.0367	59.7776	1.06676	0.0932327	0.808252	1
689	dd_Smed_v6_1070_0_1	20612.5	17593.4	23631.6	1.34321	0.425689	0.0386171	0.79056
690	dd_Smed_v6_10710_0_1	88.1411	97.1834	79.0988	0.813912	-0.297054	0.472474	0.961609
691	dd_Smed_v6_10711_0_1	47.1214	55.7461	38.4966	0.690571	-0.534139	0.257406	0.908396
692	dd_Smed_v6_10712_0_1	182.387	193.728	171.046	0.882919	-0.179648	0.426322	0.953792
693	dd_Smed_v6_10713_0_1	14.8286	13.5978	16.0593	1.18102	0.240039	0.701979	0.989979
694	dd_Smed_v6_10714_0_1	482.341	539.709	424.973	0.787411	-0.344811	0.0835848	0.844208
695	dd_Smed_v6_10715_0_1	110.57	98.0955	123.044	1.25433	0.326914	0.178387	0.866457
696	dd_Smed_v6_10716_0_1	254.822	260.615	249.03	0.955548	-0.0656002	0.768687	0.999913
697	dd_Smed_v6_10717_0_1	345.881	372.131	319.632	0.858923	-0.219399	0.27476	0.912338
698	dd_Smed_v6_10718_0_1	20.4418	15.2547	25.6288	1.68006	0.74851	0.0524877	0.827484
7832	dd_Smed_v6_24180_0_1	13.2245	22.245	4.20391	0.188982	-2.40368	3.76091e-06	0.00462028
700	dd_Smed_v6_1071_0_1	29.6616	27.5541	31.7691	1.15297	0.205359	0.576251	0.976959
701	dd_Smed_v6_10722_0_1	2.2024	1.63814	2.76665	1.6889	0.756083	0.556756	0.972987
702	dd_Smed_v6_10724_0_1	650.265	652.373	648.157	0.993538	-0.00935353	0.988047	1
703	dd_Smed_v6_10725_0_1	39.8444	44.0829	35.6059	0.807703	-0.308104	0.596925	0.977433
704	dd_Smed_v6_10727_0_1	135.858	123.849	147.866	1.19392	0.255707	0.437993	0.959862
705	dd_Smed_v6_10729_0_1	91.2198	89.2955	93.1441	1.0431	0.0608764	0.816242	1
706	dd_Smed_v6_1072_0_1	1797.77	2017.54	1578.01	0.782145	-0.354491	0.369046	0.934885
707	dd_Smed_v6_10730_0_1	418.936	380.802	457.069	1.20028	0.26337	0.187701	0.871776
708	dd_Smed_v6_10731_0_1	524.109	520.713	527.505	1.01304	0.0186953	0.949255	1
8090	dd_Smed_v6_25256_0_1	29.1438	48.489	9.79852	0.202077	-2.30702	1.42067e-08	4.88682e-05
710	dd_Smed_v6_10733_0_1	154.951	165.167	144.735	0.876298	-0.190506	0.391464	0.943264
711	dd_Smed_v6_10734_0_1	778.165	751.054	805.276	1.07219	0.100567	0.597572	0.977433
712	dd_Smed_v6_10735_0_1	32.943	25.5583	40.3277	1.57787	0.657977	0.0414611	0.803892
713	dd_Smed_v6_10737_0_1	569.297	555.133	583.46	1.05103	0.0718002	0.72177	0.993557
714	dd_Smed_v6_10738_0_1	110.383	105.508	115.258	1.0924	0.127506	0.60927	0.978821
715	dd_Smed_v6_10739_0_1	5.75209	7.30568	4.1985	0.57469	-0.799143	0.437152	0.959545
716	dd_Smed_v6_1073_0_1	6440.42	6145.49	6735.35	1.09598	0.132224	0.467755	0.96106
717	dd_Smed_v6_10741_0_1	452.66	388.449	516.87	1.3306	0.412077	0.0389792	0.79056
718	dd_Smed_v6_10742_0_1	423.403	449.246	397.56	0.88495	-0.176332	0.380888	0.940747
719	dd_Smed_v6_10744_0_1	491.865	481.769	501.962	1.04191	0.0592352	0.750228	0.996389
720	dd_Smed_v6_10745_0_1	173.815	174.827	172.803	0.98842	-0.0168039	0.953684	1
721	dd_Smed_v6_10748_0_1	1105.11	1252.56	957.656	0.76456	-0.387299	0.0549887	0.827484
722	dd_Smed_v6_10749_0_1	41.5558	50.6349	32.4768	0.64139	-0.640725	0.0904059	0.844208
723	dd_Smed_v6_1074_0_1	3812.18	4132.19	3492.17	0.845114	-0.242782	0.190193	0.871776
724	dd_Smed_v6_10750_0_1	59.1809	50.3513	68.0105	1.35072	0.433729	0.1236	0.854642
725	dd_Smed_v6_10750_1_1	215.216	212.184	218.247	1.02858	0.0406494	0.87046	1
726	dd_Smed_v6_10751_0_1	410.548	379.507	441.588	1.16358	0.218575	0.257257	0.908354
727	dd_Smed_v6_10752_0_1	167.54	168.444	166.636	0.989266	-0.015569	0.950047	1
728	dd_Smed_v6_10753_0_1	18.8458	19.9515	17.74	0.889155	-0.169493	0.832501	1
729	dd_Smed_v6_10754_0_1	227.903	206.602	249.205	1.20621	0.270481	0.199824	0.877491
730	dd_Smed_v6_10755_0_1	65.311	66.8482	63.7738	0.95401	-0.0679243	0.823636	1
731	dd_Smed_v6_10757_0_1	160.205	163.422	156.989	0.96064	-0.0579327	0.790306	1
732	dd_Smed_v6_10758_0_1	359.898	377.125	342.67	0.908637	-0.138224	0.499995	0.965145
733	dd_Smed_v6_10759_0_1	217.12	229.178	205.062	0.894771	-0.160409	0.450765	0.960203
734	dd_Smed_v6_1075_0_1	2240.64	2093.1	2388.18	1.14098	0.190274	0.311628	0.925449
735	dd_Smed_v6_10760_0_1	414.071	439.537	388.604	0.884122	-0.177683	0.35842	0.93133
736	dd_Smed_v6_10761_0_1	57.4114	49.3375	65.4852	1.32729	0.408483	0.140373	0.858367
737	dd_Smed_v6_10762_0_1	452.464	487.802	417.127	0.855115	-0.22581	0.24915	0.901563
738	dd_Smed_v6_10763_0_1	51.9743	63.3667	40.582	0.640431	-0.642886	0.030846	0.773456
739	dd_Smed_v6_10764_0_1	393.104	357.467	428.741	1.19938	0.262295	0.185339	0.871153
740	dd_Smed_v6_10765_0_1	259.1	230.765	287.434	1.24557	0.316806	0.130068	0.856634
741	dd_Smed_v6_10766_0_1	415.349	366.528	464.17	1.26639	0.340727	0.199303	0.877491
742	dd_Smed_v6_10768_0_1	184.808	193.171	176.444	0.913406	-0.130671	0.539557	0.971807
743	dd_Smed_v6_10769_0_1	180.38	175.726	185.034	1.05297	0.0744658	0.733539	0.994925
744	dd_Smed_v6_1076_0_1	3572.73	3609.27	3536.18	0.979748	-0.029518	0.864727	1
745	dd_Smed_v6_10770_0_1	56.8588	44.7871	68.9306	1.53907	0.622059	0.020881	0.707943
746	dd_Smed_v6_10771_0_1	146.178	154.616	137.74	0.890849	-0.166747	0.457219	0.960203
747	dd_Smed_v6_10774_0_1	285.319	269.118	301.521	1.12041	0.164021	0.441264	0.960203
748	dd_Smed_v6_10776_0_1	453.637	428.314	478.96	1.11825	0.161236	0.428194	0.954881
749	dd_Smed_v6_10777_0_1	542.89	612.411	473.369	0.772961	-0.371533	0.17508	0.863578
750	dd_Smed_v6_10778_0_1	363.58	340.203	386.957	1.13743	0.185776	0.368226	0.934656
751	dd_Smed_v6_1077_0_1	1175.31	1115.23	1235.39	1.10775	0.147628	0.436404	0.959545
752	dd_Smed_v6_10780_0_1	239.895	248.298	231.493	0.932316	-0.101109	0.63934	0.983655
753	dd_Smed_v6_10781_0_1	128.64	115.095	142.184	1.23536	0.304937	0.180292	0.867738
754	dd_Smed_v6_10782_0_1	95.4922	100.114	90.8709	0.907678	-0.139748	0.694846	0.989137
755	dd_Smed_v6_10783_0_1	58.6193	58.416	58.8226	1.00696	0.0100056	0.980917	1
756	dd_Smed_v6_10784_0_1	35.6708	40.4301	30.9115	0.764566	-0.387287	0.201343	0.878193
757	dd_Smed_v6_10785_0_1	559.328	554.162	564.494	1.01864	0.0266501	0.908437	1
758	dd_Smed_v6_10786_0_1	330.813	319.681	341.944	1.06964	0.0971273	0.620085	0.979737
759	dd_Smed_v6_10787_0_1	246.817	246.028	247.606	1.00642	0.00922598	0.985604	1
760	dd_Smed_v6_10789_0_1	233.664	266.367	200.961	0.754452	-0.4065	0.0559677	0.827484
761	dd_Smed_v6_1078_1_1	1337.67	1202.22	1473.11	1.22532	0.29316	0.119443	0.851131
762	dd_Smed_v6_10790_0_1	192.205	201.665	182.745	0.906179	-0.142132	0.527913	0.968961
763	dd_Smed_v6_10791_0_1	585.542	475.452	695.631	1.46309	0.549023	0.00480578	0.599398
764	dd_Smed_v6_10792_0_1	244.738	286.925	202.551	0.705936	-0.502391	0.143097	0.860292
765	dd_Smed_v6_10793_0_1	31.6078	34.5568	28.6588	0.829322	-0.269996	0.408257	0.950564
766	dd_Smed_v6_10794_0_1	516.627	560.535	472.719	0.843335	-0.245822	0.216973	0.882103
767	dd_Smed_v6_10796_0_1	214.876	235.396	194.356	0.825653	-0.276392	0.196421	0.876782
768	dd_Smed_v6_10797_0_1	37.4191	35.4788	39.3593	1.10937	0.149746	0.636527	0.982892
769	dd_Smed_v6_10798_0_1	190.605	178.506	202.705	1.13557	0.183414	0.392907	0.943264
770	dd_Smed_v6_1079_0_1	3181.79	3091.2	3272.39	1.05861	0.0821766	0.655039	0.985708
771	dd_Smed_v6_107_0_1	7434.35	7812.95	7055.75	0.903084	-0.147068	0.431472	0.955931
772	dd_Smed_v6_10801_0_1	133.04	121.566	144.514	1.18877	0.249474	0.287261	0.917484
773	dd_Smed_v6_10802_0_1	211.721	217.915	205.528	0.943159	-0.0844275	0.695797	0.989137
774	dd_Smed_v6_10803_0_1	170.432	181.212	159.653	0.881027	-0.182742	0.41254	0.950859
775	dd_Smed_v6_10804_0_1	738.051	764.867	711.236	0.929881	-0.104881	0.581006	0.976959
776	dd_Smed_v6_10805_0_1	87.0551	67.7608	106.349	1.56948	0.650289	0.0144297	0.667071
777	dd_Smed_v6_10806_0_1	185.344	151.844	218.845	1.44125	0.527317	0.0252031	0.739587
778	dd_Smed_v6_10808_0_1	541.032	568.594	513.47	0.903052	-0.147118	0.451429	0.960203
779	dd_Smed_v6_10811_0_1	170.705	172.43	168.981	0.979999	-0.0291477	0.894146	1
780	dd_Smed_v6_10812_0_1	139.519	147.626	131.413	0.890173	-0.167842	0.44429	0.960203
781	dd_Smed_v6_10813_0_1	152.354	171.29	133.417	0.778892	-0.360506	0.100263	0.848514
782	dd_Smed_v6_10815_0_1	237.829	255.989	219.669	0.858117	-0.220754	0.305316	0.924271
783	dd_Smed_v6_10816_0_1	159.413	161.515	157.311	0.973972	-0.0380481	0.860043	1
784	dd_Smed_v6_10817_0_1	53.2369	64.0719	42.4019	0.661786	-0.595563	0.219398	0.882103
785	dd_Smed_v6_10819_0_1	58.3402	54.7684	61.912	1.13043	0.176875	0.56422	0.974769
786	dd_Smed_v6_1081_0_1	4292.27	4916.63	3667.91	0.746021	-0.422711	0.0542851	0.827484
787	dd_Smed_v6_10820_0_1	610.524	608.029	613.019	1.00821	0.0117911	0.958094	1
788	dd_Smed_v6_10822_0_1	421.706	402.62	440.792	1.09481	0.13068	0.505945	0.965707
789	dd_Smed_v6_10823_0_1	490.565	474.872	506.259	1.0661	0.0923362	0.650981	0.985339
790	dd_Smed_v6_10824_0_1	415.017	449.422	380.612	0.846892	-0.23975	0.2382	0.891192
791	dd_Smed_v6_10825_0_1	220.593	202.977	238.208	1.17357	0.230904	0.275884	0.913226
792	dd_Smed_v6_10826_0_1	250.935	250.064	251.805	1.00697	0.0100142	0.961014	1
793	dd_Smed_v6_10827_0_1	131.268	135.066	127.469	0.943758	-0.083511	0.734356	0.994925
794	dd_Smed_v6_10828_0_1	370.828	406.94	334.715	0.822518	-0.281881	0.176697	0.86631
795	dd_Smed_v6_10829_0_1	169.909	185.786	154.033	0.829087	-0.270404	0.224604	0.886658
796	dd_Smed_v6_10829_1_1	52.5431	42.1355	62.9507	1.49401	0.579188	0.034975	0.788364
797	dd_Smed_v6_1082_0_1	125.103	135.357	114.85	0.848498	-0.237017	0.318219	0.927702
798	dd_Smed_v6_10830_0_2	49.5738	41.5171	57.6305	1.38812	0.473129	0.111588	0.849478
799	dd_Smed_v6_10831_0_1	358.017	383.506	332.528	0.867073	-0.205774	0.323528	0.928833
800	dd_Smed_v6_10832_0_1	269.355	258.231	280.48	1.08616	0.119238	0.567929	0.975675
801	dd_Smed_v6_10833_0_1	649.452	660.092	638.813	0.967764	-0.0472727	0.812667	1
802	dd_Smed_v6_10834_0_1	456.873	450.791	462.956	1.02698	0.0384144	0.846042	1
803	dd_Smed_v6_10835_0_1	108.527	129.587	87.4666	0.674963	-0.56712	0.638119	0.983077
804	dd_Smed_v6_10837_0_1	449.422	488.39	410.455	0.840424	-0.250811	0.201373	0.878193
805	dd_Smed_v6_1083_0_1	3035.36	2903.49	3167.23	1.09084	0.125437	0.507227	0.965707
806	dd_Smed_v6_10841_0_1	466.009	566.723	365.296	0.644576	-0.633577	0.00403142	0.591843
807	dd_Smed_v6_10842_0_1	150.516	155.681	145.351	0.933641	-0.0990597	0.677291	0.98891
808	dd_Smed_v6_10845_0_2	68.4032	72.6879	64.1186	0.882108	-0.180972	0.505463	0.965707
809	dd_Smed_v6_10846_0_1	433.421	459.571	407.271	0.886198	-0.174298	0.758157	0.997922
810	dd_Smed_v6_10848_0_1	362.596	354.181	371.012	1.04752	0.0669784	0.729144	0.993869
811	dd_Smed_v6_10849_0_1	312.706	327.343	298.069	0.910569	-0.135159	0.513628	0.967326
812	dd_Smed_v6_10850_0_1	369.193	350.913	387.474	1.10419	0.142987	0.516401	0.967326
813	dd_Smed_v6_10851_0_1	102.184	92.0175	112.35	1.22096	0.288014	0.214293	0.882103
814	dd_Smed_v6_10852_0_1	199.724	206.202	193.245	0.937166	-0.0936241	0.69091	0.989137
815	dd_Smed_v6_10853_0_1	22.7871	19.8842	25.6901	1.29199	0.369594	0.339422	0.929132
816	dd_Smed_v6_10854_0_1	333.026	340.16	325.893	0.958058	-0.0618156	0.754626	0.997163
817	dd_Smed_v6_10855_0_1	373.829	407.325	340.333	0.835532	-0.259232	0.192867	0.873681
818	dd_Smed_v6_10857_0_1	146.414	156.933	135.894	0.865934	-0.207671	0.610931	0.978821
819	dd_Smed_v6_10858_0_1	511.244	526.643	495.845	0.94152	-0.0869366	0.664579	0.988675
820	dd_Smed_v6_10859_0_1	301.559	331.126	271.991	0.821411	-0.283825	0.170199	0.862094
821	dd_Smed_v6_1085_0_1	32.1639	32.2089	32.119	0.997207	-0.00403557	0.994981	1
822	dd_Smed_v6_10861_0_1	338.404	396.741	280.067	0.705919	-0.502425	0.0544329	0.827484
823	dd_Smed_v6_10863_0_1	151.925	135.835	168.015	1.2369	0.306733	0.163157	0.861426
824	dd_Smed_v6_10864_0_1	301.915	315.258	288.571	0.915348	-0.127607	0.523297	0.968738
825	dd_Smed_v6_10866_0_1	811.217	845.915	776.52	0.917965	-0.123489	0.532389	0.96977
826	dd_Smed_v6_10868_0_1	130.074	124.83	135.318	1.08402	0.116397	0.613185	0.978821
827	dd_Smed_v6_10869_0_1	206.024	201.746	210.301	1.04241	0.0599193	0.780669	1
828	dd_Smed_v6_1086_0_1	3270.76	2900.37	3641.14	1.2554	0.328151	0.0751698	0.844208
829	dd_Smed_v6_10870_0_1	204.531	215.227	193.834	0.900603	-0.151037	0.458023	0.960203
830	dd_Smed_v6_10872_0_1	153.854	165.232	142.475	0.862272	-0.213784	0.336488	0.929132
831	dd_Smed_v6_10873_0_1	405.988	421.219	390.757	0.92768	-0.1083	0.598436	0.97785
832	dd_Smed_v6_10874_0_1	24.6488	22.9428	26.3548	1.14872	0.200023	0.627462	0.979876
833	dd_Smed_v6_10875_0_1	43.2194	44.8423	41.5965	0.927618	-0.108397	0.734995	0.994925
834	dd_Smed_v6_10876_0_1	98.4457	114.829	82.0627	0.714652	-0.484687	0.211196	0.882103
835	dd_Smed_v6_10877_0_1	10.8284	11.3107	10.346	0.914706	-0.12862	0.839391	1
836	dd_Smed_v6_10878_0_1	50.0303	47.3409	52.7198	1.11362	0.155257	0.681362	0.98891
837	dd_Smed_v6_10879_0_1	169.89	168.895	170.885	1.01178	0.016902	0.956367	1
838	dd_Smed_v6_1087_0_1	3997.09	3940.65	4053.53	1.02865	0.0407452	0.815374	1
839	dd_Smed_v6_10880_0_1	85.5072	96.2335	74.7809	0.777077	-0.36387	0.357144	0.930263
840	dd_Smed_v6_10881_0_1	82.7228	86.6567	78.789	0.909208	-0.137318	0.577953	0.976959
841	dd_Smed_v6_10882_0_1	156.744	149.536	163.953	1.09641	0.132791	0.536938	0.971807
842	dd_Smed_v6_10883_0_1	312.944	359.14	266.747	0.742737	-0.429076	0.194115	0.874431
843	dd_Smed_v6_10885_0_1	91.312	86.6807	95.9433	1.10686	0.146471	0.550471	0.971902
844	dd_Smed_v6_10887_0_2	18.3417	14.5811	22.1023	1.51581	0.600091	0.182975	0.868644
845	dd_Smed_v6_10888_0_1	327.575	322.952	332.197	1.02863	0.0407202	0.840097	1
846	dd_Smed_v6_10889_0_1	647.748	690.262	605.233	0.876816	-0.189653	0.332046	0.929132
847	dd_Smed_v6_1088_0_1	13600.4	12779.4	14421.3	1.12848	0.174387	0.340421	0.929132
848	dd_Smed_v6_10890_0_1	83.2443	75.526	90.9625	1.20439	0.268297	0.298419	0.923921
849	dd_Smed_v6_10891_0_1	258.22	211.11	305.331	1.44631	0.532375	0.0105998	0.655775
850	dd_Smed_v6_10892_0_1	123.835	124.944	122.727	0.982256	-0.0258284	0.917309	1
851	dd_Smed_v6_10893_0_1	595.964	584.135	607.794	1.0405	0.0572809	0.761648	0.999216
852	dd_Smed_v6_10894_0_1	186.536	215.271	157.8	0.733032	-0.448052	0.258786	0.908593
853	dd_Smed_v6_10897_0_1	63.4099	69.1264	57.6933	0.834606	-0.260832	0.354896	0.929607
854	dd_Smed_v6_10898_0_1	158.05	149.525	166.574	1.11402	0.155775	0.480109	0.962187
855	dd_Smed_v6_10899_0_1	232.383	236.392	228.374	0.966079	-0.0497866	0.828799	1
856	dd_Smed_v6_1089_0_1	1165.89	1156.77	1175	1.01576	0.0225607	0.904771	1
857	dd_Smed_v6_108_0_1	16440.4	15013.9	17867	1.19003	0.251001	0.169417	0.862094
858	dd_Smed_v6_10900_0_1	257.476	255.901	259.051	1.01231	0.0176482	0.945572	1
859	dd_Smed_v6_10901_0_1	131.672	146.924	116.421	0.792386	-0.335725	0.2149	0.882103
860	dd_Smed_v6_10902_0_1	146.997	134.367	159.626	1.18798	0.24851	0.271049	0.910799
861	dd_Smed_v6_10903_0_1	146.982	124.349	169.616	1.36403	0.447879	0.0459736	0.807435
862	dd_Smed_v6_10905_0_1	208.782	267.721	149.842	0.559695	-0.837287	0.0519793	0.827484
863	dd_Smed_v6_10906_0_1	38.177	37.8086	38.5453	1.01948	0.0278394	0.972817	1
864	dd_Smed_v6_10908_0_1	40.4892	44.1372	36.8411	0.834695	-0.260679	0.416935	0.951598
865	dd_Smed_v6_1090_0_1	825.227	963.945	686.509	0.712187	-0.489673	0.150721	0.860292
866	dd_Smed_v6_10910_0_1	402.272	395.428	409.116	1.03462	0.0490942	0.826725	1
867	dd_Smed_v6_10911_0_1	244.878	269.524	220.232	0.817115	-0.29139	0.214469	0.882103
868	dd_Smed_v6_10912_0_1	70.7499	78.183	63.3168	0.809854	-0.304267	0.369234	0.934885
869	dd_Smed_v6_10914_0_1	79.7817	85.5998	73.9636	0.864063	-0.210792	0.38469	0.942285
870	dd_Smed_v6_10915_0_1	219.58	245.158	194.002	0.791335	-0.33764	0.167936	0.862094
871	dd_Smed_v6_10916_0_1	119.55	135.733	103.367	0.761545	-0.392999	0.407412	0.950289
872	dd_Smed_v6_10917_0_1	583.662	546.49	620.833	1.13604	0.184009	0.346924	0.929132
873	dd_Smed_v6_10919_0_1	70.7193	61.11	80.3286	1.31449	0.394506	0.17406	0.862094
874	dd_Smed_v6_10921_0_1	352.009	338.108	365.91	1.08223	0.114005	0.560936	0.973615
875	dd_Smed_v6_10923_0_1	63.1555	60.7765	65.5345	1.07829	0.108741	0.725626	0.993869
876	dd_Smed_v6_10924_0_1	725.734	708.19	743.279	1.04955	0.0697664	0.706545	0.991224
877	dd_Smed_v6_10925_0_1	31.4313	31.9114	30.9511	0.969907	-0.0440824	0.955449	1
878	dd_Smed_v6_10926_0_1	431.978	384.479	479.477	1.24708	0.318555	0.109871	0.849478
879	dd_Smed_v6_10927_0_1	373.659	380.655	366.663	0.963241	-0.0540314	0.79789	1
880	dd_Smed_v6_10928_0_1	44.0292	45.8437	42.2147	0.92084	-0.118978	0.778602	1
881	dd_Smed_v6_10929_0_2	397.687	455.7	339.674	0.745389	-0.423935	0.0538296	0.827484
882	dd_Smed_v6_1092_0_1	1872.55	1715.28	2029.83	1.18338	0.242918	0.195999	0.876645
883	dd_Smed_v6_10930_0_1	72.3329	78.622	66.0438	0.840017	-0.251509	0.327612	0.929132
884	dd_Smed_v6_10933_0_1	144.466	139.076	149.856	1.07751	0.107705	0.644379	0.984567
885	dd_Smed_v6_10934_0_1	319.346	328.048	310.645	0.946949	-0.0786416	0.709701	0.991322
886	dd_Smed_v6_10935_0_1	399.97	439.447	360.493	0.820334	-0.285717	0.151139	0.860292
887	dd_Smed_v6_10936_0_1	71.3035	77.2799	65.3271	0.845331	-0.242411	0.343107	0.929132
888	dd_Smed_v6_10939_0_1	372.204	349.821	394.587	1.12797	0.173725	0.381334	0.941105
889	dd_Smed_v6_1093_0_1	672.113	564.885	779.342	1.37965	0.464298	0.0165626	0.667071
890	dd_Smed_v6_10941_0_1	12.5701	14.933	10.2072	0.68353	-0.548924	0.261803	0.909125
891	dd_Smed_v6_10942_0_1	173.925	206.714	141.135	0.682753	-0.550565	0.0137811	0.667071
892	dd_Smed_v6_10943_0_1	152.444	164.944	139.945	0.848439	-0.237117	0.277852	0.914145
893	dd_Smed_v6_10945_0_1	241.009	225.719	256.3	1.13548	0.183305	0.386111	0.942923
894	dd_Smed_v6_10946_0_1	657.444	632.001	682.887	1.08052	0.111719	0.576137	0.976959
895	dd_Smed_v6_10947_0_1	220.549	199.057	242.04	1.21593	0.282059	0.183489	0.868644
896	dd_Smed_v6_10948_0_1	94.602	105.273	83.9314	0.797277	-0.326847	0.183933	0.868658
897	dd_Smed_v6_10949_0_1	208.365	213.874	202.857	0.948489	-0.0762974	0.698101	0.989199
898	dd_Smed_v6_1094_0_1	1343.23	1006.25	1680.2	1.66977	0.739651	0.00227468	0.469119
899	dd_Smed_v6_10951_0_1	248.162	262.818	233.505	0.888465	-0.170612	0.408786	0.950568
900	dd_Smed_v6_10952_0_1	75.5814	78.6403	72.5224	0.922203	-0.116843	0.796346	1
901	dd_Smed_v6_10953_0_1	74.8766	71.5824	78.1707	1.09204	0.127023	0.637113	0.982892
902	dd_Smed_v6_10954_0_1	192.973	196.526	189.42	0.963843	-0.0531303	0.886605	1
903	dd_Smed_v6_10955_0_1	319.847	337.782	301.913	0.89381	-0.161959	0.435653	0.959405
904	dd_Smed_v6_10956_0_1	20.4277	15.6496	25.2057	1.61063	0.687624	0.0724035	0.844208
905	dd_Smed_v6_10957_0_1	25.0871	28.2339	21.9403	0.777089	-0.363849	0.30011	0.923921
906	dd_Smed_v6_10958_0_1	371.244	375.832	366.657	0.975587	-0.0356569	0.854015	1
907	dd_Smed_v6_10959_0_1	508.209	511.684	504.734	0.986417	-0.0197304	0.922289	1
908	dd_Smed_v6_1095_0_1	1311.55	1293.61	1329.49	1.02773	0.0394667	0.834903	1
909	dd_Smed_v6_10962_0_1	474.712	440.465	508.958	1.1555	0.208519	0.286171	0.917484
910	dd_Smed_v6_10966_0_1	415.211	373.417	457.004	1.22384	0.291418	0.144919	0.860292
911	dd_Smed_v6_10967_0_1	258.182	258.516	257.848	0.997415	-0.00373426	1	1
912	dd_Smed_v6_10968_0_1	38.4712	40.7945	36.1479	0.886099	-0.17446	0.594683	0.977433
913	dd_Smed_v6_10969_0_1	532.945	548.505	517.386	0.943266	-0.0842641	0.656446	0.986285
914	dd_Smed_v6_1096_0_1	2945.06	2845.92	3044.2	1.06967	0.0971676	0.605349	0.978821
915	dd_Smed_v6_10970_0_1	120.126	149.27	90.9823	0.609516	-0.714264	0.115475	0.849478
916	dd_Smed_v6_10972_0_1	341.682	324.048	359.316	1.10884	0.149046	0.451879	0.960203
917	dd_Smed_v6_10973_0_1	110.806	116.161	105.451	0.907801	-0.139552	0.605105	0.978821
918	dd_Smed_v6_10974_0_1	286.334	275.747	296.921	1.07679	0.106735	0.580273	0.976959
919	dd_Smed_v6_10976_0_1	140.655	145.981	135.33	0.927039	-0.109298	0.622178	0.979737
920	dd_Smed_v6_10977_0_1	276.78	290.863	262.696	0.903161	-0.146946	0.471816	0.961609
921	dd_Smed_v6_10979_0_1	10.2309	8.62266	11.8392	1.37303	0.457362	0.329265	0.929132
922	dd_Smed_v6_1097_0_1	1375.4	1368.05	1382.75	1.01075	0.0154191	0.911525	1
923	dd_Smed_v6_10980_0_1	269.401	247.497	291.305	1.177	0.23512	0.254087	0.905544
924	dd_Smed_v6_10981_0_1	358.563	372.874	344.251	0.923237	-0.115228	0.573477	0.976959
925	dd_Smed_v6_10983_0_1	560.973	557.065	564.881	1.01403	0.020102	0.922735	1
926	dd_Smed_v6_10984_0_1	205.358	222.452	188.264	0.846311	-0.240741	0.265175	0.910359
927	dd_Smed_v6_10985_0_1	188.496	186.215	190.778	1.0245	0.0349234	0.868398	1
928	dd_Smed_v6_10986_0_1	444.817	436.763	452.871	1.03688	0.0522492	0.799914	1
929	dd_Smed_v6_10987_0_1	454.842	447.586	462.099	1.03243	0.046038	0.80522	1
930	dd_Smed_v6_10988_0_1	5.30841	4.30193	6.31488	1.46792	0.553771	0.387733	0.943264
931	dd_Smed_v6_10989_0_1	470.278	494.735	445.822	0.901132	-0.150189	0.460069	0.960282
932	dd_Smed_v6_1098_0_1	12078.8	11765.8	12391.8	1.05321	0.0747873	0.675515	0.98891
933	dd_Smed_v6_10990_0_1	1090.17	1194.43	985.914	0.825426	-0.276789	0.156907	0.861426
934	dd_Smed_v6_10994_0_1	222.019	252.059	191.98	0.761644	-0.392811	0.129502	0.856634
935	dd_Smed_v6_10996_0_1	390.01	439.392	340.629	0.775228	-0.367308	0.0652751	0.832931
936	dd_Smed_v6_10997_0_1	374.922	385.273	364.571	0.946265	-0.0796839	0.685675	0.988947
937	dd_Smed_v6_10998_0_1	221.066	207.563	234.568	1.1301	0.176456	0.40088	0.9482
938	dd_Smed_v6_10999_0_1	14.9151	12.0091	17.8211	1.48396	0.569456	0.510685	0.967215
939	dd_Smed_v6_1099_0_1	4633.58	4496.62	4770.54	1.06092	0.0853103	0.643594	0.984552
940	dd_Smed_v6_10_0_1	56714.5	55682.9	57746.1	1.03705	0.0524878	0.789593	1
941	dd_Smed_v6_10_1_1	162489	184019	140958	0.765998	-0.384588	0.409939	0.950568
942	dd_Smed_v6_11000_0_1	114.291	136.839	91.7425	0.670443	-0.576813	0.180267	0.867738
943	dd_Smed_v6_11002_0_1	279.115	334.294	223.937	0.669878	-0.578029	0.00526224	0.600681
944	dd_Smed_v6_11003_0_1	17.552	17.9188	17.1853	0.959063	-0.0603023	0.931242	1
945	dd_Smed_v6_11004_0_1	792.934	877.884	707.984	0.806466	-0.310314	0.10756	0.849478
946	dd_Smed_v6_11005_0_1	195.696	181.668	209.725	1.15444	0.207189	0.327714	0.929132
947	dd_Smed_v6_11006_0_1	50.087	41.4254	58.7487	1.41818	0.504042	0.162076	0.861426
948	dd_Smed_v6_11007_0_1	242.622	251.447	233.796	0.929802	-0.105004	0.617783	0.979737
949	dd_Smed_v6_11008_0_1	264.424	214.739	314.108	1.46275	0.548678	0.00858012	0.655775
950	dd_Smed_v6_11009_0_1	22.5636	24.3022	20.8251	0.856926	-0.222758	0.741971	0.99503
951	dd_Smed_v6_1100_0_1	4400.97	4303.05	4498.9	1.04551	0.0642122	0.734983	0.994925
952	dd_Smed_v6_11010_0_1	667.152	674.206	660.098	0.979076	-0.0305072	0.885109	1
953	dd_Smed_v6_11011_0_1	197.531	236.706	158.356	0.668997	-0.579928	0.0704781	0.842838
954	dd_Smed_v6_11012_0_1	230.3	215.622	244.978	1.13614	0.184145	0.393674	0.943902
955	dd_Smed_v6_11013_0_1	74.2261	75.3455	73.1067	0.970286	-0.0435185	0.879076	1
956	dd_Smed_v6_11014_0_1	191.294	183.328	199.261	1.08691	0.120236	0.576853	0.976959
957	dd_Smed_v6_11015_0_1	8.18857	8.31306	8.06409	0.970051	-0.0438681	0.971844	1
958	dd_Smed_v6_11017_0_1	543.227	540.755	545.7	1.00915	0.0131341	0.939317	1
959	dd_Smed_v6_11018_0_1	66.6206	78.6401	54.601	0.694315	-0.526337	0.295253	0.920569
960	dd_Smed_v6_11019_0_1	367.108	398.055	336.161	0.844507	-0.243819	0.222505	0.884635
961	dd_Smed_v6_1101_0_1	2680.91	2615.79	2746.04	1.04979	0.0701054	0.716365	0.992767
962	dd_Smed_v6_11021_0_1	111.398	102.116	120.68	1.1818	0.240982	0.312531	0.925449
963	dd_Smed_v6_11022_0_1	147.189	129.343	165.036	1.27595	0.351577	0.115581	0.849478
964	dd_Smed_v6_11023_0_1	324.458	322.3	326.615	1.01339	0.0191864	0.922938	1
965	dd_Smed_v6_11023_1_1	13.6992	13.6409	13.7575	1.00855	0.0122847	1	1
966	dd_Smed_v6_11024_0_1	133.878	139.015	128.742	0.926103	-0.110755	0.64057	0.983886
967	dd_Smed_v6_11025_0_1	103.326	96.5404	110.111	1.14057	0.189752	0.424696	0.953792
968	dd_Smed_v6_11026_0_1	135.623	139.646	131.6	0.942383	-0.0856153	0.695145	0.989137
969	dd_Smed_v6_11027_0_1	186.304	183.934	188.674	1.02577	0.0367067	0.855165	1
970	dd_Smed_v6_1102_0_1	4677.42	4021.18	5333.66	1.32639	0.407507	0.08469	0.844208
971	dd_Smed_v6_11031_0_1	114.344	90.2738	138.415	1.53328	0.616623	0.0138842	0.667071
972	dd_Smed_v6_11032_0_1	108.466	111.541	105.39	0.944858	-0.0818312	0.73721	0.99503
973	dd_Smed_v6_11034_0_1	724.652	754.682	694.621	0.920415	-0.119643	0.537228	0.971807
974	dd_Smed_v6_11037_0_1	198.493	195.46	201.526	1.03103	0.0440931	0.840019	1
975	dd_Smed_v6_11039_0_1	291.664	288.37	294.958	1.02285	0.0325885	0.875601	1
976	dd_Smed_v6_1103_0_1	1865.21	1829.94	1900.47	1.03854	0.0545548	0.760505	0.998765
977	dd_Smed_v6_11040_0_1	243.543	242.688	244.398	1.00705	0.0101335	0.970909	1
978	dd_Smed_v6_11041_0_1	133.329	116.351	150.308	1.29184	0.369431	0.0966643	0.844208
979	dd_Smed_v6_11042_1_1	276.317	248.135	304.498	1.22715	0.29531	0.148173	0.860292
980	dd_Smed_v6_11045_0_1	17.4451	14.2595	20.6308	1.44681	0.532875	0.223313	0.886191
981	dd_Smed_v6_11046_0_1	130.861	130.035	131.687	1.01271	0.0182155	0.94182	1
982	dd_Smed_v6_11047_0_1	383.491	423.472	343.511	0.811176	-0.301913	0.16025	0.861426
983	dd_Smed_v6_11048_0_1	306.888	320.808	292.968	0.913219	-0.130967	0.513125	0.96732
984	dd_Smed_v6_11049_0_1	173.499	169.635	177.364	1.04556	0.0642814	0.787524	1
985	dd_Smed_v6_1104_0_1	5165.67	5196.97	5134.38	0.987956	-0.0174807	0.928053	1
986	dd_Smed_v6_11050_0_1	114.038	114.587	113.489	0.990421	-0.0138857	0.932743	1
987	dd_Smed_v6_11051_0_1	359.761	351.85	367.671	1.04497	0.0634577	0.756506	0.997743
988	dd_Smed_v6_11053_0_1	180.816	189.55	172.083	0.907849	-0.139475	0.531928	0.96968
989	dd_Smed_v6_11054_0_1	45.9749	42.2336	49.7161	1.17717	0.235323	0.433027	0.957418
990	dd_Smed_v6_11057_0_1	41.0435	54.6153	27.4718	0.503006	-0.991353	0.0577507	0.827552
991	dd_Smed_v6_11059_0_1	69.7816	73.4991	66.064	0.898841	-0.153863	0.562305	0.973935
992	dd_Smed_v6_11060_0_1	157.649	129.021	186.278	1.44378	0.529847	0.0194766	0.682235
993	dd_Smed_v6_11061_0_1	96.4681	92.8447	100.092	1.07805	0.108428	0.668771	0.988675
994	dd_Smed_v6_11062_0_1	227.754	238.207	217.3	0.912231	-0.132529	0.521611	0.96745
995	dd_Smed_v6_11063_0_1	202.978	191.497	214.459	1.1199	0.163376	0.450233	0.960203
996	dd_Smed_v6_11065_0_1	7.30377	6.97227	7.63526	1.09509	0.131048	0.94622	1
997	dd_Smed_v6_11066_0_1	404.896	469.334	340.459	0.725408	-0.463135	0.0462667	0.807435
998	dd_Smed_v6_11067_0_1	596.002	612.492	579.512	0.946155	-0.0798521	0.69355	0.989137
999	dd_Smed_v6_11068_0_1	223.547	200.527	246.568	1.2296	0.29819	0.158269	0.861426
1000	dd_Smed_v6_1106_0_1	10648.9	11192.2	10105.6	0.902918	-0.147333	0.422973	0.953792
1001	dd_Smed_v6_11070_0_1	734.622	763.887	705.356	0.923378	-0.115007	0.556666	0.972977
1002	dd_Smed_v6_11071_0_1	134.64	144.991	124.288	0.857212	-0.222276	0.45498	0.960203
1003	dd_Smed_v6_11072_0_1	357.052	356.304	357.8	1.0042	0.00604519	0.990424	1
1004	dd_Smed_v6_11073_0_1	118.199	107.456	128.942	1.19995	0.262971	0.248262	0.90034
1005	dd_Smed_v6_11074_0_1	27.8211	26.5409	29.1013	1.09647	0.132869	0.67417	0.988675
1006	dd_Smed_v6_11075_0_1	54.3613	55.1214	53.6012	0.972421	-0.0403466	0.904779	1
1007	dd_Smed_v6_11076_0_1	195.903	223.666	168.139	0.751742	-0.41169	0.0930649	0.844208
1008	dd_Smed_v6_11077_0_1	339.571	311.805	367.337	1.1781	0.236462	0.239587	0.891716
1009	dd_Smed_v6_11078_0_1	252.68	226.21	279.15	1.23403	0.303376	0.145145	0.860292
1010	dd_Smed_v6_11079_0_1	101.205	110.131	92.2793	0.837903	-0.255145	0.311407	0.925449
1011	dd_Smed_v6_1107_0_1	8674.85	8458.1	8891.6	1.05125	0.0721102	0.684403	0.988947
1012	dd_Smed_v6_11081_0_1	256.788	254.633	258.942	1.01692	0.0242049	0.899646	1
1013	dd_Smed_v6_11083_0_1	114.945	130.957	98.9324	0.755458	-0.404576	0.120558	0.853283
1014	dd_Smed_v6_11084_0_1	140.652	164.833	116.471	0.706602	-0.50103	0.200834	0.87813
1015	dd_Smed_v6_11085_0_1	376.392	398.225	354.56	0.890351	-0.167554	0.388276	0.943264
1016	dd_Smed_v6_11087_0_1	134.924	147.553	122.296	0.82883	-0.270852	0.233449	0.88815
1017	dd_Smed_v6_11088_0_2	140.138	129.992	150.284	1.1561	0.209271	0.344787	0.929132
1018	dd_Smed_v6_11089_0_1	264.999	273.806	256.193	0.935672	-0.0959246	0.634478	0.982622
1019	dd_Smed_v6_11090_0_1	36.6761	31.5473	41.805	1.32515	0.406158	0.251194	0.903283
1020	dd_Smed_v6_11091_0_1	189.216	180.266	198.165	1.09929	0.136576	0.533987	0.970519
1021	dd_Smed_v6_11092_0_1	511.753	534.609	488.897	0.914495	-0.128953	0.511193	0.96732
1022	dd_Smed_v6_11093_0_1	392.96	402.744	383.177	0.951416	-0.0718523	0.742407	0.99503
1023	dd_Smed_v6_11096_0_1	94.4308	80.9587	107.903	1.33281	0.414475	0.0873128	0.844208
1024	dd_Smed_v6_11097_0_1	372.582	354.963	390.201	1.09927	0.136549	0.499017	0.965145
1025	dd_Smed_v6_11098_0_1	56.4496	50.4239	62.4754	1.239	0.309181	0.260173	0.908881
1026	dd_Smed_v6_11099_0_1	61.5763	54.3497	68.8029	1.26593	0.340198	0.191487	0.871776
1027	dd_Smed_v6_1109_0_1	6549	6469.7	6628.3	1.02451	0.0349389	0.850478	1
1028	dd_Smed_v6_110_0_1	4330.45	4349.96	4310.94	0.991029	-0.0130003	0.970663	1
1029	dd_Smed_v6_11100_0_1	457.897	508.275	407.519	0.801768	-0.318742	0.10253	0.848514
1030	dd_Smed_v6_11101_0_1	58.244	63.0645	53.4234	0.847123	-0.239356	0.634083	0.982622
1031	dd_Smed_v6_11103_1_1	179.537	170.915	188.158	1.10089	0.138667	0.534394	0.970519
1032	dd_Smed_v6_11104_0_1	100.447	112.906	87.9866	0.779288	-0.359772	0.422996	0.953792
1033	dd_Smed_v6_11106_0_1	133.625	127.858	139.393	1.09021	0.124612	0.580985	0.976959
1034	dd_Smed_v6_11107_0_1	203.767	204.008	203.526	0.997635	-0.00341544	0.987799	1
1035	dd_Smed_v6_11109_0_1	518.146	511.613	524.68	1.02554	0.036384	0.849313	1
1036	dd_Smed_v6_1110_0_1	4673.44	4556.25	4790.63	1.05144	0.0723696	0.694611	0.989137
1037	dd_Smed_v6_11111_2_1	29.7957	31.1581	28.4333	0.912551	-0.132023	0.75836	0.997922
1038	dd_Smed_v6_11112_0_1	236.377	235.673	237.08	1.00597	0.00858729	0.984247	1
1039	dd_Smed_v6_11113_0_1	213.637	193.2	234.074	1.21156	0.276867	0.201337	0.878193
1040	dd_Smed_v6_11115_0_1	491.515	486.301	496.729	1.02144	0.0306107	0.883134	1
1041	dd_Smed_v6_11117_0_1	189.603	172.37	206.835	1.19995	0.26297	0.219954	0.882103
1042	dd_Smed_v6_11118_0_1	404.057	391.071	417.043	1.06641	0.0927659	0.64073	0.983886
1043	dd_Smed_v6_1111_0_1	7488.54	8010.63	6966.45	0.86965	-0.201493	0.279706	0.915297
1044	dd_Smed_v6_11120_0_1	128.119	121.649	134.589	1.10637	0.145836	0.516855	0.967326
1045	dd_Smed_v6_11121_0_1	189.414	173.668	205.161	1.18134	0.240423	0.274139	0.912338
1046	dd_Smed_v6_11122_0_1	108.247	103.476	113.018	1.09222	0.127259	0.587339	0.976959
1047	dd_Smed_v6_11123_0_1	322.107	283.88	360.334	1.26932	0.344056	0.0950236	0.844208
1048	dd_Smed_v6_11124_0_1	135.365	136.582	134.148	0.98218	-0.0259407	0.910563	1
1049	dd_Smed_v6_11125_0_1	82.999	74.3939	91.6041	1.23134	0.300228	0.234998	0.890052
1050	dd_Smed_v6_11125_1_1	6.23768	7.9364	4.53896	0.571916	-0.806124	0.264409	0.910359
1051	dd_Smed_v6_11127_0_1	509.306	509.194	509.418	1.00044	0.000634183	0.996653	1
1052	dd_Smed_v6_11128_0_1	229.333	238.703	219.963	0.921494	-0.117954	0.57562	0.976959
1053	dd_Smed_v6_11130_0_1	136.039	141.582	130.497	0.921706	-0.117622	0.610463	0.978821
1054	dd_Smed_v6_11131_0_1	85.6518	87.4978	83.8058	0.957805	-0.0621964	0.862496	1
1055	dd_Smed_v6_11132_0_1	129.295	136.759	121.83	0.890838	-0.166764	0.521545	0.96745
1056	dd_Smed_v6_11133_0_1	312.76	316.076	309.445	0.97902	-0.0305897	0.895537	1
1057	dd_Smed_v6_11134_0_1	165.236	171.557	158.916	0.926317	-0.110422	0.623069	0.979737
1058	dd_Smed_v6_11135_0_1	598.191	598.502	597.879	0.998959	-0.00150247	0.991956	1
1059	dd_Smed_v6_11136_0_1	54.1587	59.2172	49.1001	0.829153	-0.270289	0.623947	0.979755
1060	dd_Smed_v6_11137_0_1	377.873	363.759	391.986	1.0776	0.107821	0.580771	0.976959
1061	dd_Smed_v6_1113_0_1	3343.15	3189.61	3496.69	1.09628	0.13261	0.467811	0.96106
1062	dd_Smed_v6_11140_0_1	372.463	392.703	352.222	0.896918	-0.156952	0.653125	0.985339
1063	dd_Smed_v6_11141_0_1	432.83	459.147	406.514	0.885368	-0.175651	0.378557	0.93995
1064	dd_Smed_v6_11142_0_1	188.179	223.207	153.15	0.686136	-0.543433	0.0131661	0.667071
1065	dd_Smed_v6_11144_0_1	289.213	292.303	286.123	0.978858	-0.0308284	0.872168	1
1066	dd_Smed_v6_11145_0_1	330.173	300.111	360.236	1.20034	0.263444	0.181479	0.868325
1067	dd_Smed_v6_11146_0_1	215.232	271.469	158.995	0.585682	-0.77181	0.0323026	0.777849
1068	dd_Smed_v6_11148_0_1	562.079	571.475	552.683	0.967116	-0.0482391	0.809097	1
1069	dd_Smed_v6_11149_0_1	324.959	355.437	294.482	0.828507	-0.271414	0.188005	0.871776
1070	dd_Smed_v6_1114_0_1	15685.4	15637.6	15733.2	1.00611	0.00879127	0.967135	1
1071	dd_Smed_v6_11150_0_1	272.017	234.295	309.739	1.322	0.402724	0.107741	0.849478
1072	dd_Smed_v6_11151_0_1	96.0895	87.6208	104.558	1.1933	0.254959	0.314277	0.925818
1073	dd_Smed_v6_11152_0_1	676.015	778.97	573.061	0.735666	-0.442878	0.0215078	0.719674
1074	dd_Smed_v6_11153_0_1	160.741	148.948	172.534	1.15835	0.212068	0.333058	0.929132
1075	dd_Smed_v6_11154_0_1	207.877	200.156	215.598	1.07715	0.107219	0.737213	0.99503
1076	dd_Smed_v6_11155_0_1	128.79	148.07	109.51	0.739584	-0.435215	0.351498	0.929132
1077	dd_Smed_v6_11156_0_1	29.1909	34.8727	23.5092	0.674142	-0.568875	0.271486	0.910901
1078	dd_Smed_v6_11157_0_1	435.818	492.555	379.081	0.76962	-0.377782	0.0560877	0.827484
1079	dd_Smed_v6_11158_0_1	159.159	163.09	155.227	0.951784	-0.0712942	0.758425	0.997922
1080	dd_Smed_v6_1115_0_1	442.218	403.623	480.813	1.19124	0.252466	0.192158	0.872476
1081	dd_Smed_v6_11160_0_1	411.524	412.585	410.462	0.994854	-0.00744305	0.988011	1
1082	dd_Smed_v6_11161_0_1	50.6393	58.4591	42.8195	0.73247	-0.449158	0.407366	0.950289
1083	dd_Smed_v6_11162_0_1	184.683	153.739	215.628	1.40256	0.488063	0.0258836	0.746932
1084	dd_Smed_v6_11163_0_1	178.616	150.181	207.051	1.37867	0.46328	0.141067	0.858367
1085	dd_Smed_v6_11164_0_1	126.67	141.814	111.526	0.786424	-0.346621	0.126326	0.856547
1086	dd_Smed_v6_11165_0_1	86.7002	87.3297	86.0708	0.985584	-0.0209489	0.959796	1
1087	dd_Smed_v6_11168_0_1	353.953	372.38	335.526	0.901031	-0.150351	0.452943	0.960203
1088	dd_Smed_v6_11169_0_1	104.193	113.145	95.2414	0.841767	-0.248507	0.455755	0.960203
1089	dd_Smed_v6_11170_0_1	106.015	102.159	109.871	1.07549	0.104993	0.657817	0.98664
1090	dd_Smed_v6_11171_1_1	17.981	21.2192	14.7429	0.69479	-0.525352	0.35452	0.929607
1091	dd_Smed_v6_11172_0_1	400.413	375.436	425.39	1.13306	0.180219	0.374068	0.938254
1092	dd_Smed_v6_11175_0_1	62.6848	60.0482	65.3214	1.08782	0.121434	0.728811	0.993869
1093	dd_Smed_v6_11176_0_1	185.601	168.361	202.842	1.2048	0.268799	0.209569	0.882103
1094	dd_Smed_v6_11177_0_1	460.553	428.106	493	1.15158	0.203618	0.30233	0.923921
1095	dd_Smed_v6_11178_0_1	22.8144	20.9652	24.6637	1.17641	0.23439	0.600143	0.978353
1096	dd_Smed_v6_11179_0_1	144.203	154.45	133.955	0.867304	-0.205391	0.354429	0.929607
1097	dd_Smed_v6_1117_0_1	1131.76	1102.49	1161.02	1.05309	0.0746271	0.70426	0.990285
1098	dd_Smed_v6_11181_0_1	72.5181	72.8308	72.2054	0.991412	-0.0124428	0.975858	1
1099	dd_Smed_v6_11182_0_1	268.824	318.288	219.36	0.689187	-0.537033	0.0101336	0.655775
1100	dd_Smed_v6_11184_0_1	504.099	560.151	448.048	0.799871	-0.322161	0.101186	0.848514
1101	dd_Smed_v6_11185_0_1	305.516	302.205	308.827	1.02191	0.0312712	0.881225	1
1102	dd_Smed_v6_11186_0_1	31.8353	33.8285	29.8421	0.882158	-0.180891	0.549607	0.971902
1103	dd_Smed_v6_11187_0_1	271.556	279.7	263.413	0.941767	-0.0865581	0.692428	0.989137
1104	dd_Smed_v6_11189_0_1	469.634	452.247	487.021	1.07689	0.106873	0.590644	0.976959
1105	dd_Smed_v6_1118_0_1	2159.72	2292.84	2026.61	0.883886	-0.178068	0.342075	0.929132
1106	dd_Smed_v6_11190_0_1	158.79	177.345	140.235	0.790747	-0.338712	0.156611	0.861426
1107	dd_Smed_v6_11191_0_5	152.322	141.287	163.357	1.15621	0.209399	0.519863	0.96745
1108	dd_Smed_v6_11192_0_1	88.0309	78.2732	97.7887	1.24933	0.321151	0.472072	0.961609
1109	dd_Smed_v6_11193_0_1	438.126	512.901	363.351	0.708423	-0.497318	0.0132959	0.667071
1110	dd_Smed_v6_11194_0_1	72.5658	70.3145	74.817	1.06403	0.0895421	0.724087	0.993869
1111	dd_Smed_v6_11196_0_1	130.902	141.588	120.216	0.849054	-0.236072	0.310672	0.925449
1112	dd_Smed_v6_11197_0_1	159.15	177.728	140.573	0.790943	-0.338354	0.130844	0.856634
1113	dd_Smed_v6_11198_0_1	209.088	178.513	239.663	1.34255	0.424979	0.046082	0.807435
1114	dd_Smed_v6_11199_0_1	654.55	624.708	684.392	1.09554	0.131642	0.499507	0.965145
1115	dd_Smed_v6_111_0_1	8710.1	9072.35	8347.85	0.920142	-0.120071	0.665234	0.988675
1116	dd_Smed_v6_11200_0_1	135.131	154.766	115.497	0.746269	-0.422232	0.190764	0.871776
1117	dd_Smed_v6_11201_0_1	184.012	170.946	197.078	1.15287	0.205232	0.358276	0.931184
1118	dd_Smed_v6_11203_0_1	121.386	149.913	92.8596	0.619425	-0.690998	0.0438241	0.807435
1119	dd_Smed_v6_11206_0_1	234.267	218.466	250.067	1.14465	0.194902	0.348382	0.929132
1120	dd_Smed_v6_11207_0_1	168.159	196.089	140.229	0.715127	-0.483729	0.0307608	0.773456
1121	dd_Smed_v6_11208_0_1	191.182	186.57	195.793	1.04943	0.0696104	0.751173	0.996389
1122	dd_Smed_v6_1120_0_1	8055.67	8010.26	8101.07	1.01134	0.0162643	0.927978	1
1123	dd_Smed_v6_11210_0_1	244.475	252.071	236.879	0.939728	-0.0896854	0.658575	0.987034
1124	dd_Smed_v6_11211_0_1	243.493	286.005	200.982	0.702722	-0.508975	0.0553708	0.827484
1125	dd_Smed_v6_11212_1_1	365.941	364.237	367.645	1.00936	0.0134354	0.950106	1
1126	dd_Smed_v6_11213_0_1	6.54438	7.94279	5.14597	0.647879	-0.626203	0.404198	0.950181
1127	dd_Smed_v6_11214_0_1	73.8022	73.6585	73.9459	1.0039	0.00561954	1	1
1128	dd_Smed_v6_11216_0_1	573.953	542.956	604.949	1.11418	0.155978	0.458877	0.960203
1129	dd_Smed_v6_11217_0_1	4.66377	5.32164	4.0059	0.752756	-0.409745	0.744539	0.99503
1130	dd_Smed_v6_1121_0_1	1050.24	1081.4	1019.08	0.942371	-0.0856323	0.655933	0.986269
1131	dd_Smed_v6_11220_0_1	244.235	266.082	222.389	0.835792	-0.258785	0.228446	0.886658
1132	dd_Smed_v6_11221_0_1	0.487942	0.655256	0.320628	0.489318	-1.03116	0.93295	1
1133	dd_Smed_v6_11223_0_1	386.374	395.104	377.644	0.955807	-0.0652087	0.743104	0.99503
1134	dd_Smed_v6_11225_0_1	196.425	162.628	230.223	1.41564	0.501456	0.0211217	0.71024
1135	dd_Smed_v6_11226_0_1	252.742	298.078	207.407	0.695814	-0.523227	0.0506313	0.825928
1136	dd_Smed_v6_11227_0_1	145.401	150.469	140.334	0.932644	-0.100602	0.680968	0.98891
1137	dd_Smed_v6_11228_0_1	364.938	398.731	331.145	0.830497	-0.267954	0.202802	0.879296
1138	dd_Smed_v6_11229_0_1	249.979	259.124	240.834	0.929416	-0.105603	0.608118	0.978821
1139	dd_Smed_v6_1122_0_1	13461.5	13694.5	13228.6	0.965977	-0.049939	0.801777	1
1140	dd_Smed_v6_11230_0_1	84.6032	91.7284	77.4779	0.844644	-0.243584	0.582761	0.976959
1141	dd_Smed_v6_11231_0_1	430.845	394.731	466.959	1.18298	0.242425	0.231068	0.887311
1142	dd_Smed_v6_11232_0_1	237.463	253.746	221.18	0.871658	-0.198165	0.332383	0.929132
1143	dd_Smed_v6_11234_0_1	98.138	85.279	110.997	1.30157	0.380258	0.100632	0.848514
1144	dd_Smed_v6_11236_0_1	188.021	186.479	189.563	1.01654	0.0236646	0.927603	1
1145	dd_Smed_v6_11237_0_1	254.28	252.454	256.105	1.01446	0.0207164	0.926263	1
1146	dd_Smed_v6_11238_0_1	147.336	163.413	131.259	0.803235	-0.316106	0.157235	0.861426
1147	dd_Smed_v6_11239_0_1	27.6024	26.5409	28.6638	1.07998	0.111011	0.77964	1
1148	dd_Smed_v6_1123_0_1	7443.43	6831.42	8055.45	1.17918	0.237779	0.190099	0.871776
1149	dd_Smed_v6_11240_0_1	473.666	549.378	397.955	0.724375	-0.465192	0.0183099	0.667071
1150	dd_Smed_v6_11241_0_1	125.903	136.964	114.843	0.838489	-0.254136	0.272017	0.911452
1151	dd_Smed_v6_11243_0_1	107.006	103.196	110.816	1.07384	0.102777	0.688893	0.989137
1152	dd_Smed_v6_11245_0_1	237.498	228.746	246.25	1.07652	0.106379	0.619083	0.979737
1153	dd_Smed_v6_11246_0_1	196.501	202.723	190.279	0.938618	-0.0913902	0.69379	0.989137
1154	dd_Smed_v6_11247_0_1	177.514	186.041	168.986	0.908327	-0.138716	0.536888	0.971807
1155	dd_Smed_v6_11248_0_1	377.014	462.665	291.363	0.629748	-0.667153	0.00907068	0.655775
1156	dd_Smed_v6_11249_0_1	22.9879	28.1605	17.8154	0.632637	-0.66055	0.082428	0.844208
1157	dd_Smed_v6_1124_0_1	1187.92	1263.79	1112.05	0.879931	-0.184538	0.326812	0.929132
1158	dd_Smed_v6_11251_0_1	291.299	264.503	318.094	1.20261	0.266166	0.183115	0.868644
1159	dd_Smed_v6_11252_0_1	300.835	271.392	330.278	1.21697	0.283299	0.159982	0.861426
1160	dd_Smed_v6_11253_0_1	133.432	142.496	124.369	0.872786	-0.1963	0.43474	0.958725
1161	dd_Smed_v6_11254_0_1	14.403	15.9222	12.8837	0.809162	-0.305499	0.496817	0.964963
1162	dd_Smed_v6_11255_0_1	103.723	111.455	95.9919	0.861265	-0.21547	0.380481	0.940747
1163	dd_Smed_v6_11256_0_1	0.633386	0.333732	0.93304	2.79578	1.48325	0.701122	0.989979
1164	dd_Smed_v6_11258_0_1	5.8701	4.98783	6.75238	1.35377	0.436984	0.49306	0.964963
1165	dd_Smed_v6_11259_0_1	819.611	892.587	746.635	0.836485	-0.257589	0.174264	0.862094
1166	dd_Smed_v6_1125_0_1	4614.65	4265.98	4963.32	1.16347	0.21843	0.23377	0.88848
1167	dd_Smed_v6_11261_0_1	355.146	332.983	377.31	1.13312	0.1803	0.36982	0.934959
1168	dd_Smed_v6_11262_0_1	140.211	164.048	116.374	0.709391	-0.495348	0.0520824	0.827484
1169	dd_Smed_v6_11263_0_1	9.71231	6.63834	12.7863	1.92613	0.945702	0.0334328	0.779789
1170	dd_Smed_v6_11264_0_1	135.736	144.884	126.587	0.873709	-0.194775	0.603512	0.978821
1171	dd_Smed_v6_11265_0_1	2.82132	2.64552	2.99713	1.13291	0.180028	0.972701	1
1172	dd_Smed_v6_11266_0_1	278.754	262.309	295.2	1.12539	0.170429	0.422865	0.953792
1173	dd_Smed_v6_11267_0_1	189.307	191.303	187.31	0.979129	-0.0304285	0.882193	1
1174	dd_Smed_v6_11268_0_1	189.702	191.6	187.805	0.980194	-0.0288603	0.899426	1
1175	dd_Smed_v6_11269_0_1	371.622	353.574	389.671	1.10209	0.140243	0.486246	0.962807
1176	dd_Smed_v6_1126_0_1	1755.11	1759.67	1750.54	0.994809	-0.00750795	0.970719	1
1177	dd_Smed_v6_11270_0_1	74.0207	58.7499	89.2915	1.51986	0.603937	0.0182837	0.667071
1178	dd_Smed_v6_11271_0_1	526.308	607.124	445.491	0.733772	-0.446596	0.0616254	0.829945
1179	dd_Smed_v6_11272_0_1	273.827	257.269	290.384	1.12872	0.174685	0.391085	0.943264
1180	dd_Smed_v6_11273_0_1	180.735	192.611	168.859	0.876684	-0.189871	0.378408	0.93995
1181	dd_Smed_v6_11274_0_1	103.715	109.841	97.5882	0.888451	-0.170636	0.46653	0.96106
1182	dd_Smed_v6_11277_0_1	268.663	270.197	267.129	0.988643	-0.0164787	0.945471	1
1183	dd_Smed_v6_11279_0_1	110.932	110.725	111.139	1.00373	0.00537477	0.965959	1
1184	dd_Smed_v6_1127_0_1	4310.9	4382.94	4238.85	0.967125	-0.0482254	0.807203	1
1185	dd_Smed_v6_11280_0_1	322.798	346.526	299.069	0.863049	-0.212485	0.302961	0.923921
1186	dd_Smed_v6_11281_1_1	67.1005	52.724	81.477	1.54535	0.627932	0.018397	0.667533
1187	dd_Smed_v6_11282_0_1	174.045	172.899	175.19	1.01325	0.0189865	0.948878	1
1188	dd_Smed_v6_11283_0_1	152.402	157.491	147.313	0.935372	-0.0963875	0.659854	0.987034
1189	dd_Smed_v6_11285_0_1	43.8501	29.7497	57.9505	1.94793	0.961945	0.00978395	0.655775
1190	dd_Smed_v6_11286_0_1	25.8923	30.2731	21.5115	0.710581	-0.492928	0.482257	0.962187
1191	dd_Smed_v6_11287_0_1	216.293	228.736	203.85	0.891202	-0.166175	0.448795	0.960203
1192	dd_Smed_v6_11288_0_1	15.9449	18.2711	13.6187	0.745369	-0.423973	0.465809	0.96106
1193	dd_Smed_v6_11289_0_1	313.074	343.567	282.581	0.822491	-0.281928	0.170056	0.862094
1194	dd_Smed_v6_1128_0_1	4.20803	4.32036	4.09571	0.948	-0.0770409	1	1
1195	dd_Smed_v6_11291_0_1	438.889	431.517	446.261	1.03417	0.0484726	0.800688	1
1196	dd_Smed_v6_11292_0_1	326.626	346.129	307.124	0.887313	-0.172486	0.41234	0.950859
1197	dd_Smed_v6_11293_0_1	240.994	283.503	198.484	0.700112	-0.514342	0.0488646	0.819183
1198	dd_Smed_v6_11294_0_1	35.8786	39.1808	32.5763	0.831434	-0.266326	0.401857	0.948683
1199	dd_Smed_v6_11295_1_1	416.974	426.66	407.287	0.954593	-0.0670429	0.740294	0.99503
1200	dd_Smed_v6_11296_0_1	698.19	697.019	699.362	1.00336	0.0048426	0.97094	1
1201	dd_Smed_v6_11297_0_1	131.083	149.3	112.866	0.755965	-0.403608	0.270463	0.910799
1202	dd_Smed_v6_11298_0_1	62.8417	67.2804	58.4031	0.868056	-0.204141	0.420072	0.952577
1203	dd_Smed_v6_11299_0_1	176.869	180.949	172.79	0.95491	-0.0665636	0.768305	0.999913
1204	dd_Smed_v6_1129_0_1	0.810983	0.995132	0.626834	0.6299	-0.666804	0.951944	1
1205	dd_Smed_v6_112_0_1	18989.3	18503.6	19475	1.0525	0.0738202	0.68323	0.988947
1206	dd_Smed_v6_11300_0_1	477.405	467.582	487.227	1.04201	0.0593753	0.776732	1
1207	dd_Smed_v6_11302_0_1	23.8887	26.9177	20.8597	0.774944	-0.367835	0.446918	0.960203
1208	dd_Smed_v6_11303_0_1	78.0828	75.0908	81.0748	1.07969	0.110618	0.697823	0.989137
1209	dd_Smed_v6_11304_0_1	249.281	258.374	240.188	0.929612	-0.1053	0.605651	0.978821
1210	dd_Smed_v6_11305_0_1	59.1674	64.4937	53.841	0.834827	-0.260451	0.359109	0.931806
1211	dd_Smed_v6_11306_0_1	248.036	252.204	243.868	0.966945	-0.0484946	0.827363	1
1212	dd_Smed_v6_11307_0_1	413.967	445.713	382.221	0.85755	-0.221707	0.252706	0.904347
1213	dd_Smed_v6_11308_0_1	82.6126	77.2256	87.9996	1.13951	0.188418	0.444684	0.960203
1214	dd_Smed_v6_1130_0_1	5635.49	5446.9	5824.09	1.06925	0.0965974	0.59901	0.978037
1215	dd_Smed_v6_11310_0_1	465.17	430.577	499.762	1.16068	0.214969	0.277126	0.913849
1216	dd_Smed_v6_11311_0_1	297.765	289.535	305.995	1.05685	0.079771	0.718669	0.992946
1217	dd_Smed_v6_11312_0_1	54.2226	55.314	53.1313	0.960541	-0.0580815	0.863122	1
1218	dd_Smed_v6_11313_0_1	135.032	137.256	132.809	0.967599	-0.0475193	0.818676	1
1219	dd_Smed_v6_11314_0_1	99.5236	102.652	96.3952	0.939048	-0.0907292	0.728717	0.993869
1220	dd_Smed_v6_11315_0_1	75.199	65.6079	84.79	1.29238	0.370025	0.271285	0.910799
1221	dd_Smed_v6_11316_0_1	83.401	90.6395	76.1626	0.84028	-0.251058	0.41077	0.950573
1222	dd_Smed_v6_11317_0_1	412.67	387.32	438.02	1.1309	0.17747	0.370788	0.935893
1223	dd_Smed_v6_11318_0_1	175.15	151.941	198.358	1.3055	0.384597	0.0819857	0.844208
1224	dd_Smed_v6_11319_0_1	380.719	363.396	398.043	1.09534	0.131383	0.531879	0.96968
1225	dd_Smed_v6_1131_0_1	5871.56	5982.07	5761.06	0.963053	-0.0543126	0.774479	1
1226	dd_Smed_v6_11320_0_1	179.22	178.267	180.173	1.0107	0.0153486	0.966536	1
1227	dd_Smed_v6_11322_0_1	34.816	32.1965	37.4355	1.16272	0.217503	0.476319	0.962187
1228	dd_Smed_v6_11323_0_1	60.6354	65.0847	56.1861	0.863276	-0.212106	0.425273	0.953792
1229	dd_Smed_v6_11324_0_1	153.945	153.075	154.816	1.01137	0.016312	0.925659	1
1230	dd_Smed_v6_11325_0_1	28.073	34.8541	21.2918	0.610884	-0.711029	0.259294	0.908593
1231	dd_Smed_v6_11326_0_1	65.7254	66.0429	65.4079	0.990385	-0.0139391	0.976154	1
1232	dd_Smed_v6_11327_0_1	281.308	288.978	273.639	0.94692	-0.0786855	0.697854	0.989137
1233	dd_Smed_v6_11328_0_10	63.5615	50.5252	76.5979	1.51603	0.600301	0.150505	0.860292
1234	dd_Smed_v6_11329_0_1	458.836	435.277	482.395	1.10825	0.14828	0.449771	0.960203
1235	dd_Smed_v6_1132_0_1	13851.9	14175.8	13528.1	0.954308	-0.067473	0.709653	0.991322
1236	dd_Smed_v6_11330_0_1	416.296	425.56	407.033	0.956465	-0.0642159	0.747139	0.99605
1237	dd_Smed_v6_11331_0_1	38.8093	33.5436	44.0749	1.31396	0.393922	0.209404	0.882103
1238	dd_Smed_v6_11332_0_1	94.7934	79.2652	110.321	1.3918	0.476953	0.120299	0.852499
1239	dd_Smed_v6_11334_0_1	145.742	142.941	148.543	1.03919	0.055462	0.825961	1
1240	dd_Smed_v6_11335_0_1	310.206	284.495	335.916	1.18074	0.239695	0.248444	0.90039
1241	dd_Smed_v6_11336_0_1	212.846	228.763	196.93	0.860846	-0.216172	0.588543	0.976959
1242	dd_Smed_v6_11337_0_1	193.617	207.513	179.721	0.866073	-0.207439	0.333647	0.929132
1243	dd_Smed_v6_1133_0_1	460.038	550.789	369.287	0.670469	-0.576758	0.171313	0.862094
1244	dd_Smed_v6_11341_0_1	353.837	337.431	370.243	1.09724	0.133883	0.504164	0.965707
1245	dd_Smed_v6_11342_0_1	515.764	496.051	535.477	1.07948	0.110335	0.574673	0.976959
1246	dd_Smed_v6_11343_0_1	8.06498	9.29611	6.83386	0.735132	-0.443925	0.588261	0.976959
1247	dd_Smed_v6_11344_0_1	206.861	203.873	209.849	1.02931	0.0416807	0.845512	1
1248	dd_Smed_v6_11345_0_1	343.874	353.186	334.562	0.947269	-0.078154	0.712395	0.992396
1249	dd_Smed_v6_11346_0_1	215.155	237.732	192.578	0.810062	-0.303895	0.309789	0.925449
1250	dd_Smed_v6_11349_0_1	328.456	288.176	368.737	1.27956	0.355643	0.0842554	0.844208
1251	dd_Smed_v6_1134_0_1	636.556	585.058	688.053	1.17604	0.233941	0.277046	0.913849
1252	dd_Smed_v6_11351_0_1	374.473	391.741	357.205	0.911838	-0.13315	0.499607	0.965145
1253	dd_Smed_v6_11352_0_1	322.704	335.598	309.81	0.923159	-0.115349	0.571685	0.976738
1254	dd_Smed_v6_11353_0_1	161.056	158.177	163.934	1.0364	0.0515742	0.835058	1
1255	dd_Smed_v6_11354_0_1	23.9784	25.5519	22.4048	0.876836	-0.189621	0.580132	0.976959
1256	dd_Smed_v6_11355_0_1	115.091	121.953	108.229	0.887469	-0.172231	0.578498	0.976959
1257	dd_Smed_v6_11356_0_1	187.634	215.263	160.004	0.743298	-0.427987	0.0492843	0.819183
1258	dd_Smed_v6_11357_0_1	225.098	232.117	218.08	0.939528	-0.089992	0.664668	0.988675
1259	dd_Smed_v6_11358_0_1	208.226	216.382	200.07	0.924614	-0.113077	0.590649	0.976959
1260	dd_Smed_v6_11359_0_1	105.805	101.509	110.101	1.08465	0.117224	0.601762	0.978804
1261	dd_Smed_v6_1135_0_1	3061.23	2906.35	3216.11	1.10658	0.146111	0.431425	0.955931
1262	dd_Smed_v6_11360_0_1	121.865	115.934	127.796	1.10232	0.140537	0.571663	0.976738
1263	dd_Smed_v6_11363_0_1	234.617	253.164	216.069	0.853476	-0.228577	0.272944	0.912338
1264	dd_Smed_v6_11365_0_1	190.145	181.937	198.353	1.09023	0.124629	0.549687	0.971902
1265	dd_Smed_v6_11366_0_1	464.623	478.096	451.151	0.943642	-0.0836891	0.682579	0.988947
1266	dd_Smed_v6_11367_0_1	203.549	197.355	209.743	1.06277	0.087826	0.685374	0.988947
1267	dd_Smed_v6_11368_0_1	161.888	185.45	138.327	0.745899	-0.422947	0.182382	0.868644
1268	dd_Smed_v6_1136_0_1	752.156	701.416	802.896	1.14468	0.194944	0.299977	0.923921
1269	dd_Smed_v6_11370_0_1	276.28	283.194	269.367	0.951174	-0.0722183	0.743763	0.99503
1270	dd_Smed_v6_11371_0_1	178.018	190.848	165.189	0.865552	-0.208308	0.382396	0.941399
1271	dd_Smed_v6_11372_0_1	43.8745	35.3994	52.3497	1.47883	0.564456	0.0670482	0.833209
1272	dd_Smed_v6_11374_0_1	271.391	256.919	285.863	1.11266	0.154012	0.472558	0.961609
1273	dd_Smed_v6_11375_0_1	72.1723	68.003	76.3415	1.12262	0.166868	0.549042	0.971902
1274	dd_Smed_v6_11376_0_1	410.235	412.979	407.49	0.986709	-0.0193039	0.934061	1
1275	dd_Smed_v6_11377_0_1	294.659	286	303.318	1.06055	0.0848151	0.670244	0.988675
1276	dd_Smed_v6_11378_0_1	39.4225	40.1699	38.6751	0.962789	-0.0547081	0.865372	1
1277	dd_Smed_v6_11379_0_1	22.1919	22.2329	22.1509	0.996311	-0.00533241	1	1
1278	dd_Smed_v6_1137_0_1	15307.6	15879.5	14735.7	0.927969	-0.107851	0.565634	0.975528
1279	dd_Smed_v6_11380_0_1	203.079	222.233	183.926	0.827625	-0.272951	0.264906	0.910359
1280	dd_Smed_v6_11382_0_1	146.141	136.753	155.53	1.1373	0.185616	0.42102	0.952655
1281	dd_Smed_v6_11385_0_1	474.801	550.102	399.5	0.726229	-0.461504	0.137023	0.858367
1282	dd_Smed_v6_11386_0_1	59.9788	67.7305	52.2271	0.771102	-0.375007	0.172508	0.862094
1283	dd_Smed_v6_11387_0_1	553.887	606.291	501.482	0.827131	-0.273812	0.162421	0.861426
1284	dd_Smed_v6_11388_0_1	186.404	166.743	206.065	1.23582	0.305468	0.230562	0.886658
1285	dd_Smed_v6_11389_0_1	24.0472	28.4702	19.6241	0.689285	-0.536828	0.319244	0.927702
1286	dd_Smed_v6_1138_0_1	1021.9	965.037	1078.77	1.11785	0.160732	0.401648	0.948683
1287	dd_Smed_v6_11390_0_1	642.354	703.55	581.158	0.826037	-0.275722	0.15928	0.861426
1288	dd_Smed_v6_11391_0_1	159.636	157.219	162.053	1.03075	0.0436896	0.841468	1
1289	dd_Smed_v6_11392_0_1	249.975	256.713	243.236	0.947499	-0.0778038	0.718962	0.992946
1290	dd_Smed_v6_11393_1_1	8.68885	6.63207	10.7456	1.62025	0.696219	0.25479	0.90596
1291	dd_Smed_v6_11394_0_1	563.672	557.321	570.023	1.02279	0.0325127	0.866759	1
1292	dd_Smed_v6_11395_0_1	125.717	129.064	122.369	0.948127	-0.0768475	0.707998	0.991224
1293	dd_Smed_v6_11396_0_1	262.305	259.402	265.208	1.02238	0.0319347	0.902226	1
1294	dd_Smed_v6_11397_0_1	330.083	336.696	323.471	0.960721	-0.057811	0.789125	1
1295	dd_Smed_v6_11398_0_1	229.353	202.338	256.369	1.26703	0.341455	0.1107	0.849478
1296	dd_Smed_v6_11399_0_1	165.761	172.06	159.462	0.926779	-0.109702	0.612405	0.978821
1297	dd_Smed_v6_1139_0_1	4983.69	4664.73	5302.66	1.13676	0.184923	0.313472	0.925818
1298	dd_Smed_v6_113_0_1	5163.02	4809.95	5516.09	1.14681	0.197624	0.276673	0.913691
1299	dd_Smed_v6_11400_0_1	247.77	227.108	268.433	1.18196	0.24118	0.256033	0.906309
1300	dd_Smed_v6_11401_0_1	475.232	486.355	464.11	0.954262	-0.067542	0.734903	0.994925
1301	dd_Smed_v6_11402_0_1	154.075	170.207	137.943	0.810444	-0.303215	0.173637	0.862094
1302	dd_Smed_v6_11403_0_1	155.884	159.003	152.764	0.960763	-0.0577474	0.819455	1
1303	dd_Smed_v6_11404_0_1	156.147	169.154	143.14	0.846211	-0.240911	0.389543	0.943264
1304	dd_Smed_v6_11405_0_1	429.954	473.707	386.2	0.815271	-0.294649	0.141115	0.858367
1305	dd_Smed_v6_11406_0_1	197.496	211.228	183.764	0.869976	-0.200952	0.346404	0.929132
1306	dd_Smed_v6_11408_0_1	398.293	475.078	321.509	0.67675	-0.563305	0.00674149	0.615363
1307	dd_Smed_v6_11409_0_1	338.225	345.096	331.354	0.960179	-0.058624	0.785282	1
1308	dd_Smed_v6_1140_0_1	9730.06	9073.27	10386.8	1.14477	0.195062	0.286266	0.917484
1309	dd_Smed_v6_11410_0_1	31.1419	23.6108	38.673	1.63793	0.711876	0.0364051	0.789585
1310	dd_Smed_v6_11411_0_3	57.1366	59.4043	54.8689	0.923653	-0.114577	0.719977	0.992946
1311	dd_Smed_v6_11412_0_1	45.2572	48.1366	42.3777	0.880364	-0.183829	0.538055	0.971807
1312	dd_Smed_v6_11413_0_1	116.188	96.9841	135.393	1.39603	0.48133	0.0435758	0.807435
1313	dd_Smed_v6_11417_0_1	20.078	18.2645	21.8916	1.19859	0.261338	0.488947	0.96416
1314	dd_Smed_v6_11419_0_1	9.30792	6.97829	11.6375	1.66768	0.737839	0.244209	0.89819
1315	dd_Smed_v6_1141_0_1	16.6339	14.2904	18.9775	1.32799	0.409244	0.523193	0.968738
1316	dd_Smed_v6_11420_0_1	445.393	443.05	447.736	1.01058	0.0151805	0.928849	1
1317	dd_Smed_v6_11422_0_1	23.884	25.1936	22.5743	0.896033	-0.158375	0.776715	1
1318	dd_Smed_v6_11423_0_1	15.8489	16.6022	15.0956	0.909256	-0.137241	0.832246	1
1319	dd_Smed_v6_11424_0_2	225.409	211.079	239.74	1.13578	0.183686	0.389377	0.943264
1320	dd_Smed_v6_11425_0_1	496.219	502.91	489.528	0.973392	-0.0389076	0.852574	1
1321	dd_Smed_v6_11426_0_1	28.6856	23.5741	33.7971	1.43365	0.519696	0.151618	0.860292
1322	dd_Smed_v6_11428_0_1	378.433	352.554	404.313	1.14681	0.197629	0.333749	0.929132
1323	dd_Smed_v6_11429_0_1	351.994	353.804	350.184	0.989769	-0.0148365	0.968044	1
1324	dd_Smed_v6_1142_0_1	1722.95	1547.35	1898.55	1.22696	0.295093	0.130819	0.856634
1325	dd_Smed_v6_11432_0_1	161.389	163.557	159.22	0.973486	-0.0387682	0.885823	1
1326	dd_Smed_v6_11434_0_1	44.1358	36.8444	51.4271	1.39579	0.481084	0.0799963	0.844208
1327	dd_Smed_v6_11435_0_1	255.458	294.602	216.314	0.734258	-0.445641	0.154121	0.861426
1328	dd_Smed_v6_11436_0_1	235.765	225.671	245.859	1.08946	0.123607	0.56523	0.975254
1329	dd_Smed_v6_11439_0_1	111.096	108.712	113.48	1.04386	0.0619306	0.822211	1
1330	dd_Smed_v6_1143_0_1	4027.26	4094.14	3960.38	0.967329	-0.0479213	0.795584	1
1331	dd_Smed_v6_11440_0_1	152.985	152.923	153.046	1.00081	0.00116197	1	1
1332	dd_Smed_v6_11441_0_1	34.6095	40.825	28.394	0.695506	-0.523865	0.416597	0.951598
1333	dd_Smed_v6_11442_0_1	125.336	139.818	110.853	0.792834	-0.33491	0.240591	0.892948
1334	dd_Smed_v6_11443_0_1	44.0904	41.1285	47.0523	1.14403	0.194127	0.538973	0.971807
1335	dd_Smed_v6_11444_0_1	255.179	247.138	263.219	1.06507	0.0909462	0.687715	0.989129
1336	dd_Smed_v6_11446_0_1	337.848	336.643	339.053	1.00716	0.0102882	0.979952	1
1337	dd_Smed_v6_11447_0_1	388.317	363.441	413.193	1.13689	0.185097	0.365872	0.934232
1338	dd_Smed_v6_11448_0_1	123.543	108.877	138.21	1.26941	0.344153	0.136196	0.858367
1339	dd_Smed_v6_11449_0_1	204.577	230.099	179.055	0.778164	-0.361854	0.0900843	0.844208
1340	dd_Smed_v6_1144_0_1	5113.58	4274.73	5952.43	1.39247	0.477644	0.0172656	0.667071
1341	dd_Smed_v6_11450_0_1	114.972	111.084	118.86	1.07	0.0976119	0.68321	0.988947
1342	dd_Smed_v6_11452_0_1	182.004	195.362	168.647	0.863253	-0.212144	0.384587	0.942285
1343	dd_Smed_v6_11453_0_1	107.724	95.4844	119.963	1.25636	0.329251	0.20288	0.879296
1344	dd_Smed_v6_11454_0_1	99.6402	99.3566	99.9239	1.00571	0.00821394	0.985042	1
1345	dd_Smed_v6_11455_0_1	59.4285	57.4207	61.4363	1.06993	0.0975212	0.785971	1
1346	dd_Smed_v6_11456_0_1	533.043	470.043	596.043	1.26806	0.342624	0.0812221	0.844208
1347	dd_Smed_v6_11457_0_1	130.118	142.402	117.835	0.827481	-0.273201	0.29168	0.91846
1348	dd_Smed_v6_11458_0_1	128.301	130.035	126.567	0.973329	-0.0390003	0.856405	1
1349	dd_Smed_v6_11459_0_1	76.6726	83.962	69.3832	0.826364	-0.27515	0.292256	0.918587
1350	dd_Smed_v6_1145_0_1	2411.66	2296.56	2526.75	1.10023	0.137803	0.44765	0.960203
1351	dd_Smed_v6_11460_0_1	32.6353	37.5485	27.7221	0.738302	-0.437718	0.335006	0.929132
1352	dd_Smed_v6_11461_0_1	170.442	161.995	178.89	1.10429	0.143123	0.53351	0.97027
1353	dd_Smed_v6_11462_0_1	422.148	419.767	424.53	1.01135	0.0162796	0.929528	1
1354	dd_Smed_v6_11463_0_1	53.2383	57.0933	49.3832	0.864956	-0.209301	0.424245	0.953792
1355	dd_Smed_v6_11464_0_1	252.309	238.115	266.503	1.11922	0.162494	0.438574	0.959862
1356	dd_Smed_v6_11465_0_1	383.275	371.763	394.787	1.06193	0.0866928	0.678598	0.98891
1357	dd_Smed_v6_11466_0_1	464.858	512.427	417.289	0.814339	-0.296299	0.130446	0.856634
1358	dd_Smed_v6_11467_0_1	5.4335	3.98659	6.8804	1.72589	0.787337	0.30589	0.924271
1359	dd_Smed_v6_11468_0_1	49.5867	70.691	28.4824	0.402914	-1.31146	0.00760241	0.637824
1360	dd_Smed_v6_11469_0_1	46.6838	37.852	55.5157	1.46665	0.552527	0.0548222	0.827484
1361	dd_Smed_v6_1146_0_1	1106.57	1123.49	1089.65	0.969876	-0.0441282	0.881907	1
1362	dd_Smed_v6_11470_0_1	473.516	444.87	502.161	1.12878	0.174765	0.364714	0.934232
1363	dd_Smed_v6_11471_0_1	339.504	351.268	327.741	0.933023	-0.100016	0.891179	1
1364	dd_Smed_v6_11473_0_1	7.64914	7.63957	7.6587	1.0025	0.00360819	1	1
1365	dd_Smed_v6_11474_0_1	103.724	107.9	99.5481	0.922595	-0.116231	0.610149	0.978821
1366	dd_Smed_v6_11475_0_1	70.0873	78.7253	61.4492	0.780553	-0.357431	0.14091	0.858367
1367	dd_Smed_v6_11476_0_1	212.406	229.828	194.983	0.848387	-0.237206	0.35036	0.929132
1368	dd_Smed_v6_11478_0_1	84.2625	94.4767	74.0484	0.783774	-0.351491	0.152755	0.861389
1369	dd_Smed_v6_11479_0_1	230.878	267.322	194.434	0.727339	-0.4593	0.095544	0.844208
1370	dd_Smed_v6_1147_0_1	4447.81	4225.95	4669.67	1.105	0.144042	0.42193	0.953531
1371	dd_Smed_v6_11480_0_1	284.595	326.47	242.72	0.743467	-0.42766	0.0366359	0.790024
1372	dd_Smed_v6_11481_0_1	464.767	463.48	466.054	1.00555	0.00798902	0.957818	1
1373	dd_Smed_v6_11484_0_1	100.263	102.474	98.0524	0.956853	-0.0636309	0.795864	1
1374	dd_Smed_v6_11485_0_1	434.947	370.82	499.074	1.34587	0.428536	0.0807204	0.844208
1375	dd_Smed_v6_11486_0_1	21.6783	18.9076	24.4491	1.29308	0.370816	0.270144	0.910799
1376	dd_Smed_v6_11487_0_1	12.8309	16.6325	9.02924	0.542869	-0.881325	0.0314033	0.773456
1377	dd_Smed_v6_11488_0_1	39.4059	38.8347	39.9772	1.02942	0.0418283	0.922301	1
1378	dd_Smed_v6_11489_0_1	149.725	150.332	149.118	0.991922	-0.0117013	0.978269	1
1379	dd_Smed_v6_1148_0_1	3594.58	3495.77	3693.4	1.05653	0.0793384	0.661278	0.987744
1380	dd_Smed_v6_11491_0_1	144.236	175.431	113.041	0.644361	-0.634059	0.0104611	0.655775
1381	dd_Smed_v6_11492_0_1	261.699	258.432	264.966	1.02528	0.0360235	0.844202	1
1382	dd_Smed_v6_11493_0_1	1039.51	1045.92	1033.1	0.987742	-0.0177945	0.930678	1
1383	dd_Smed_v6_11494_0_1	0.942101	0.989029	0.895173	0.905103	-0.143846	1	1
1384	dd_Smed_v6_11495_0_1	92.1478	96.5704	87.7251	0.908406	-0.138591	0.553341	0.972205
1385	dd_Smed_v6_11497_0_1	18.9102	19.5441	18.2763	0.935133	-0.0967571	0.877	1
1386	dd_Smed_v6_11498_0_1	57.6225	58.1495	57.0954	0.981871	-0.0263943	0.958921	1
1387	dd_Smed_v6_11499_0_1	99.0355	88.0218	110.049	1.25025	0.322215	0.298859	0.923921
1388	dd_Smed_v6_1149_0_1	5002.5	5046.87	4958.14	0.982419	-0.0255894	0.899272	1
1389	dd_Smed_v6_114_0_1	42053	41100.5	43005.5	1.04635	0.0653644	0.721793	0.993557
1390	dd_Smed_v6_11500_0_1	261.374	237.924	284.823	1.19711	0.259561	0.208961	0.882103
1391	dd_Smed_v6_11501_0_1	4.2971	3.65888	4.93532	1.34886	0.43174	0.620969	0.979737
1392	dd_Smed_v6_11502_0_1	312.428	300.941	323.915	1.07634	0.106134	0.624111	0.979876
1393	dd_Smed_v6_11503_0_1	76.8533	78.8569	74.8498	0.949185	-0.0752388	0.760993	0.998881
1394	dd_Smed_v6_11504_0_1	291.019	280.729	301.309	1.07331	0.102066	0.621379	0.979737
1395	dd_Smed_v6_11505_0_1	204.593	222.23	186.955	0.841269	-0.249361	0.244644	0.898358
1396	dd_Smed_v6_11507_0_1	136.33	131.866	140.793	1.0677	0.0945057	0.662452	0.988334
1397	dd_Smed_v6_11508_0_1	138.228	151.916	124.54	0.819797	-0.286661	0.208101	0.882103
1398	dd_Smed_v6_1150_0_1	1233.84	1155.41	1312.27	1.13576	0.183659	0.333723	0.929132
1399	dd_Smed_v6_11510_0_1	148.052	147.102	149.001	1.01291	0.0185082	0.927389	1
1400	dd_Smed_v6_11511_0_1	132.308	154.561	110.056	0.712055	-0.489939	0.036176	0.789585
1401	dd_Smed_v6_11512_0_1	89.4343	86.8553	92.0134	1.05939	0.0832298	0.765276	0.999913
1402	dd_Smed_v6_11513_1_1	331.597	352.803	310.391	0.879786	-0.184775	0.365294	0.934232
1403	dd_Smed_v6_11514_0_1	148.287	140.969	155.604	1.10382	0.142502	0.536079	0.971756
1404	dd_Smed_v6_11519_0_1	235.384	216.18	254.587	1.17766	0.235923	0.389326	0.943264
1405	dd_Smed_v6_1151_0_1	2210.28	2355.39	2065.18	0.876787	-0.189701	0.487972	0.96416
1406	dd_Smed_v6_11520_0_1	136.472	134.083	138.862	1.03564	0.050523	0.835795	1
1407	dd_Smed_v6_11521_0_1	211.686	193.179	230.193	1.19161	0.252911	0.234352	0.888978
1408	dd_Smed_v6_11522_0_1	119.361	113.965	124.757	1.09469	0.130528	0.603697	0.978821
1409	dd_Smed_v6_11523_0_1	432.329	463.007	401.651	0.867484	-0.20509	0.291808	0.91846
1410	dd_Smed_v6_11524_0_1	299.459	315.674	283.244	0.897265	-0.156394	0.430276	0.955759
1411	dd_Smed_v6_11525_0_1	226.546	236.812	216.279	0.913296	-0.130846	0.511965	0.96732
1412	dd_Smed_v6_11527_0_1	364.119	371.061	357.177	0.962585	-0.0550142	0.775625	1
1413	dd_Smed_v6_11528_0_1	11.9049	14.6056	9.20416	0.630181	-0.666162	0.432512	0.957249
1414	dd_Smed_v6_11529_0_1	64.7977	70.5813	59.0141	0.836115	-0.258227	0.424765	0.953792
1415	dd_Smed_v6_1152_1_1	8.82019	9.30831	8.33208	0.895122	-0.159844	0.88755	1
1416	dd_Smed_v6_1152_2_1	460.731	471.937	449.525	0.952512	-0.0701915	0.721908	0.993557
1417	dd_Smed_v6_11530_0_1	243.032	240.509	245.555	1.02098	0.0299559	0.904474	1
1418	dd_Smed_v6_11531_0_1	89.5236	79.9874	99.0597	1.23844	0.308526	0.22874	0.886658
1419	dd_Smed_v6_11532_0_1	96.0861	78.3989	113.773	1.45121	0.537259	0.0282429	0.752002
1420	dd_Smed_v6_11533_0_1	262.893	252.036	273.749	1.08615	0.119226	0.572065	0.976738
1421	dd_Smed_v6_11534_0_1	269.203	276.845	261.562	0.944795	-0.0819262	0.719565	0.992946
1422	dd_Smed_v6_11535_0_1	159.256	185.841	132.671	0.713896	-0.486213	0.0282473	0.752002
1423	dd_Smed_v6_11539_0_1	506.054	580.569	431.538	0.743303	-0.427978	0.0267804	0.748244
1424	dd_Smed_v6_1153_0_1	1739.27	1570.5	1908.04	1.21492	0.280864	0.221515	0.883001
1425	dd_Smed_v6_11540_0_1	255.22	227.392	283.048	1.24475	0.315861	0.310999	0.925449
1426	dd_Smed_v6_11543_0_1	88.6152	93.0239	84.2064	0.905213	-0.143671	0.72404	0.993869
1427	dd_Smed_v6_11544_0_1	181.062	213.638	148.486	0.695037	-0.524838	0.0964422	0.844208
1428	dd_Smed_v6_11546_0_1	249.022	240.681	257.362	1.06931	0.0966751	0.64483	0.984567
1429	dd_Smed_v6_11547_0_1	279.538	299.091	259.985	0.869252	-0.202153	0.324375	0.928833
1430	dd_Smed_v6_1154_0_1	1848.86	1826.58	1871.13	1.02439	0.0347623	0.830836	1
1431	dd_Smed_v6_11550_0_1	88.9007	90.3089	87.4925	0.968813	-0.0457095	0.855202	1
1432	dd_Smed_v6_11552_0_1	50.6088	42.8891	58.3285	1.35998	0.44359	0.350217	0.929132
1433	dd_Smed_v6_11553_0_1	215.673	197.661	233.684	1.18224	0.241527	0.259555	0.908651
1434	dd_Smed_v6_11554_0_1	152.643	145.179	160.107	1.10282	0.1412	0.554544	0.97266
1435	dd_Smed_v6_11557_0_1	437.163	456.815	417.51	0.913958	-0.1298	0.517976	0.96745
1436	dd_Smed_v6_11558_0_1	17.372	11.2497	23.4944	2.08845	1.06243	0.00450127	0.59885
1437	dd_Smed_v6_11559_0_1	59.2278	63.1069	55.3486	0.877062	-0.18925	0.477838	0.962187
1438	dd_Smed_v6_11560_0_1	466.74	479.612	453.868	0.946324	-0.0795944	0.691957	0.989137
1439	dd_Smed_v6_11561_0_1	214.138	214.578	213.698	0.995897	-0.00593174	0.994683	1
1440	dd_Smed_v6_11562_0_1	55.0974	55.115	55.0799	0.999365	-0.000916625	1	1
1441	dd_Smed_v6_11564_0_1	19.8827	24.5381	15.2273	0.620554	-0.688371	0.340348	0.929132
1442	dd_Smed_v6_11565_0_1	144.208	148.009	140.407	0.948637	-0.0760726	0.69957	0.989744
1443	dd_Smed_v6_11566_0_1	85.6487	75.9399	95.3576	1.2557	0.328489	0.179397	0.866457
1444	dd_Smed_v6_1156_0_1	1367.2	1184.11	1550.29	1.30925	0.388736	0.0391228	0.79056
1445	dd_Smed_v6_11570_1_1	32.6221	25.6133	39.6309	1.54728	0.629734	0.0552404	0.827484
1446	dd_Smed_v6_11571_0_1	157.121	174.169	140.074	0.804241	-0.314301	0.170108	0.862094
1447	dd_Smed_v6_11572_0_1	154.518	164.659	144.376	0.87682	-0.189648	0.41533	0.951598
1448	dd_Smed_v6_11573_0_1	76.4651	68.652	84.2783	1.22762	0.29586	0.228907	0.886658
1449	dd_Smed_v6_11574_0_1	81.2244	88.9431	73.5056	0.826434	-0.275029	0.297131	0.923189
1450	dd_Smed_v6_11575_0_1	0.449648	0.333772	0.565523	1.69434	0.760721	1	1
1451	dd_Smed_v6_11576_0_1	268.27	280.753	255.786	0.911073	-0.134362	0.524447	0.96895
1452	dd_Smed_v6_11577_0_1	254.244	241.937	266.551	1.10174	0.139779	0.519565	0.96745
1453	dd_Smed_v6_11578_0_1	226.046	209.967	242.125	1.15316	0.205587	0.340898	0.929132
1454	dd_Smed_v6_11579_0_1	623.221	562.954	683.487	1.21411	0.279896	0.147658	0.860292
1455	dd_Smed_v6_1157_0_1	3848.5	3485.56	4211.44	1.20825	0.272923	0.138108	0.858367
1456	dd_Smed_v6_11580_0_1	102.689	105.18	100.198	0.952632	-0.0700085	0.770679	1
1457	dd_Smed_v6_11582_0_1	186.335	203.518	169.153	0.831146	-0.266826	0.211839	0.882103
1458	dd_Smed_v6_11583_0_1	6.52367	6.97195	6.07539	0.871404	-0.198586	0.787429	1
1459	dd_Smed_v6_11585_0_1	79.725	75.958	83.492	1.09919	0.136435	0.621846	0.979737
1460	dd_Smed_v6_11586_0_1	89.4497	80.6488	98.2507	1.21825	0.284816	0.253589	0.905346
1461	dd_Smed_v6_11587_0_1	215.876	185.109	246.644	1.33243	0.414054	0.141003	0.858367
1462	dd_Smed_v6_11589_0_1	101.281	106.485	96.0778	0.902268	-0.148372	0.575568	0.976959
1463	dd_Smed_v6_1158_0_1	4313.28	4307.33	4319.24	1.00277	0.00398521	0.984405	1
1464	dd_Smed_v6_11591_0_1	103.082	114.162	92.0008	0.805877	-0.311369	0.323261	0.928833
1465	dd_Smed_v6_11592_1_10	9.50202	7.28749	11.7165	1.60776	0.685053	0.228558	0.886658
1466	dd_Smed_v6_11593_0_1	104.382	113.056	95.7074	0.846548	-0.240337	0.310885	0.925449
1467	dd_Smed_v6_11594_0_1	196.086	180.792	211.38	1.16919	0.225507	0.299521	0.923921
1468	dd_Smed_v6_11595_0_1	84.3165	70.8474	97.7855	1.38023	0.464904	0.0606273	0.829945
1469	dd_Smed_v6_11598_0_1	202.39	211.867	192.914	0.910547	-0.135195	0.506205	0.965707
1470	dd_Smed_v6_11599_0_1	106.166	108.834	103.498	0.950969	-0.0725294	0.747267	0.996124
1471	dd_Smed_v6_1159_0_1	1838.54	1630.63	2046.46	1.25501	0.3277	0.0923759	0.844208
1472	dd_Smed_v6_1159_1_1	24.9563	26.899	23.0136	0.855557	-0.225064	0.562111	0.973935
1473	dd_Smed_v6_115_0_1	63704	61040.2	66367.8	1.08728	0.120723	0.504361	0.965707
1474	dd_Smed_v6_11600_0_1	31.5128	37.5912	25.4344	0.676607	-0.563611	0.368566	0.934727
1475	dd_Smed_v6_11601_0_1	346.712	353.663	339.761	0.960693	-0.0578529	0.757357	0.997743
1476	dd_Smed_v6_11602_0_1	50.154	49.3924	50.9157	1.03084	0.0438212	0.908885	1
1477	dd_Smed_v6_11603_0_1	241.68	251.454	231.906	0.92226	-0.116755	0.566194	0.975603
1478	dd_Smed_v6_11605_0_1	220.017	190.799	249.234	1.30626	0.385445	0.0669495	0.833209
1479	dd_Smed_v6_11607_0_1	127.328	126.492	128.165	1.01322	0.0189521	0.951784	1
1480	dd_Smed_v6_11608_0_1	379.895	384.6	375.19	0.975535	-0.0357337	0.838026	1
1481	dd_Smed_v6_11609_0_1	290.211	304.141	276.282	0.908402	-0.138597	0.482166	0.962187
1482	dd_Smed_v6_11610_0_1	138.232	144.944	131.519	0.907374	-0.140231	0.524787	0.968961
1483	dd_Smed_v6_11611_0_1	22.3245	23.8098	20.8392	0.875238	-0.192253	0.727601	0.993869
1484	dd_Smed_v6_11615_0_3	11.7801	7.32419	16.236	2.21677	1.14846	0.0604034	0.829945
1485	dd_Smed_v6_11616_0_1	269.26	277.853	260.667	0.938146	-0.0921157	0.643633	0.984552
1486	dd_Smed_v6_11618_0_1	38.5593	39.8417	37.2769	0.935625	-0.0959974	0.802054	1
1487	dd_Smed_v6_11619_0_1	323.03	318.335	327.726	1.0295	0.0419478	0.851419	1
1488	dd_Smed_v6_1161_0_1	2499.22	2431.14	2567.3	1.056	0.0786144	0.676573	0.98891
1489	dd_Smed_v6_1161_1_1	5691.31	5783.01	5599.6	0.968284	-0.0464975	0.786236	1
1490	dd_Smed_v6_11620_0_1	97.663	100.898	94.4284	0.935884	-0.0955979	0.707722	0.991224
1491	dd_Smed_v6_11622_0_1	221.131	222.49	219.772	0.987784	-0.017733	0.934224	1
1492	dd_Smed_v6_11623_0_1	464.055	496.478	431.632	0.869389	-0.201926	0.309055	0.925077
1493	dd_Smed_v6_11624_0_1	52.7504	55.7699	49.7309	0.891716	-0.165343	0.679814	0.98891
1494	dd_Smed_v6_11625_0_1	168.806	174.458	163.154	0.935202	-0.0966499	0.686036	0.988947
1495	dd_Smed_v6_11626_0_1	176.163	174.317	178.009	1.02118	0.0302389	0.885139	1
1496	dd_Smed_v6_11627_0_1	141.023	148.753	133.292	0.89606	-0.158332	0.493893	0.964963
1497	dd_Smed_v6_11628_0_1	28.7854	17.245	40.3259	2.33842	1.22553	0.00996156	0.655775
1498	dd_Smed_v6_11629_0_1	116.827	148.258	85.3967	0.576001	-0.795857	0.0362724	0.789585
1499	dd_Smed_v6_1162_0_1	1045.36	970.569	1120.15	1.15411	0.206786	0.319716	0.928251
1500	dd_Smed_v6_11630_0_1	333.603	314.028	353.179	1.12468	0.169509	0.413658	0.950882
1501	dd_Smed_v6_11631_0_1	45.282	55.6351	34.9289	0.627821	-0.671574	0.108685	0.849478
1502	dd_Smed_v6_11633_0_1	227.2	238.671	215.729	0.903874	-0.145806	0.48839	0.96416
1503	dd_Smed_v6_11634_0_1	28.5861	25.5762	31.596	1.23537	0.304938	0.373587	0.937759
1504	dd_Smed_v6_11635_0_1	206.837	191.91	221.765	1.15556	0.208596	0.338876	0.929132
1505	dd_Smed_v6_11636_0_1	107.675	130.45	84.9012	0.650835	-0.619636	0.0513802	0.827484
1506	dd_Smed_v6_11638_0_1	482.841	578.474	387.209	0.669363	-0.579139	0.0828375	0.844208
1507	dd_Smed_v6_1163_0_1	5041.26	4869.23	5213.3	1.07066	0.098504	0.594217	0.977433
1508	dd_Smed_v6_11640_0_1	65.3482	80.0876	50.6088	0.631918	-0.662191	0.157625	0.861426
1509	dd_Smed_v6_11641_0_1	230.942	250.154	211.729	0.846396	-0.240596	0.375484	0.93829
1510	dd_Smed_v6_11642_0_1	86.3918	76.6019	96.1816	1.2556	0.32838	0.189437	0.871776
1511	dd_Smed_v6_11644_0_1	282.854	346.624	219.084	0.632052	-0.661886	0.0706356	0.842838
1512	dd_Smed_v6_11645_0_1	81.4097	94.2741	68.5453	0.727086	-0.459803	0.15583	0.861426
1513	dd_Smed_v6_11646_0_1	66.7039	66.6863	66.7215	1.00053	0.000760189	0.992145	1
1514	dd_Smed_v6_11647_0_1	110.326	138.529	82.1237	0.592828	-0.754314	0.0951012	0.844208
1515	dd_Smed_v6_11649_0_1	27.5382	25.9225	29.1539	1.12466	0.169484	0.656832	0.986366
1516	dd_Smed_v6_1164_0_1	625.329	710.704	539.954	0.759746	-0.396412	0.10937	0.849478
293	dd_Smed_v6_1028_0_1	493.479	813.309	173.65	0.21351	-2.22762	1.82326e-06	0.00285075
1518	dd_Smed_v6_11651_0_1	347.903	372.663	323.143	0.867119	-0.205698	0.31257	0.925449
1519	dd_Smed_v6_11652_0_1	132.647	110.806	154.487	1.39421	0.479447	0.0368795	0.790024
1520	dd_Smed_v6_11653_0_1	421.223	455.5	386.946	0.849497	-0.235319	0.242089	0.894857
1521	dd_Smed_v6_11654_0_1	50.5181	46.1092	54.927	1.19124	0.252461	0.420296	0.952577
1522	dd_Smed_v6_11655_0_1	683.133	693.522	672.744	0.970039	-0.0438852	0.821429	1
1523	dd_Smed_v6_11656_0_1	67.7279	73.398	62.0577	0.845496	-0.24213	0.384949	0.942285
1524	dd_Smed_v6_11657_0_1	315.871	354.344	277.399	0.78285	-0.353191	0.0792272	0.844208
1525	dd_Smed_v6_1165_0_1	8911.71	8989.13	8834.29	0.982775	-0.0250671	0.895326	1
1526	dd_Smed_v6_11660_0_1	413.618	412.506	414.73	1.00539	0.00775717	0.981273	1
1527	dd_Smed_v6_11663_0_1	408.253	393.377	423.129	1.07563	0.105185	0.610297	0.978821
1528	dd_Smed_v6_11664_0_1	78.6043	84.9076	72.301	0.851526	-0.231877	0.460379	0.960347
1529	dd_Smed_v6_11668_0_1	26.0688	24.8842	27.2533	1.0952	0.131197	0.694162	0.989137
1530	dd_Smed_v6_11669_0_1	974.077	996.498	951.656	0.955001	-0.0664261	0.746656	0.99587
1531	dd_Smed_v6_1166_0_1	2136.86	2037.01	2236.71	1.09804	0.134927	0.477335	0.962187
1532	dd_Smed_v6_11671_0_1	16.2029	13.3075	19.0982	1.43515	0.521202	0.506292	0.965707
1533	dd_Smed_v6_11672_0_1	157.831	177.889	137.772	0.774485	-0.36869	0.17289	0.862094
1534	dd_Smed_v6_11673_0_1	204.082	211.669	196.496	0.928318	-0.10731	0.604113	0.978821
1535	dd_Smed_v6_11674_0_1	152.117	160.476	143.758	0.895819	-0.158722	0.464159	0.96106
1536	dd_Smed_v6_11675_0_2	73.7867	79.6902	67.8832	0.851838	-0.231349	0.472128	0.961609
1537	dd_Smed_v6_11676_0_1	13.3207	10.2546	16.3868	1.59799	0.67626	0.199158	0.877491
1538	dd_Smed_v6_11678_0_1	131.122	142.122	120.121	0.845198	-0.242639	0.457659	0.960203
1539	dd_Smed_v6_11679_0_1	243.038	273.088	212.987	0.779919	-0.358604	0.0892569	0.844208
1540	dd_Smed_v6_1167_0_1	5203.04	4965.99	5440.1	1.09547	0.131552	0.476355	0.962187
1541	dd_Smed_v6_11680_0_1	199.003	232.732	165.273	0.710143	-0.493818	0.0203314	0.697964
1542	dd_Smed_v6_11681_0_1	276.552	290.486	262.618	0.904064	-0.145504	0.471298	0.961609
1543	dd_Smed_v6_11682_0_1	135.974	140.301	131.646	0.938314	-0.0918568	0.676864	0.98891
1544	dd_Smed_v6_11683_0_1	490.647	488.122	493.172	1.01035	0.0148486	0.942831	1
1545	dd_Smed_v6_11684_0_1	52.1192	60.7896	43.4489	0.714742	-0.484507	0.258567	0.908593
1546	dd_Smed_v6_11685_0_1	15.8761	15.601	16.1513	1.03527	0.0500094	0.980769	1
1547	dd_Smed_v6_11686_0_1	411.799	448.783	374.815	0.835181	-0.25984	0.196585	0.876992
1548	dd_Smed_v6_11688_0_1	222.866	261.353	184.38	0.70548	-0.503322	0.220299	0.882103
1549	dd_Smed_v6_11689_0_1	284.446	229.959	338.932	1.47388	0.559618	0.00668541	0.615363
1550	dd_Smed_v6_1168_0_1	2180.8	2066.4	2295.21	1.11073	0.151512	0.420102	0.952577
1551	dd_Smed_v6_11691_0_1	44.5609	35.8615	53.2604	1.48517	0.570629	0.208352	0.882103
1552	dd_Smed_v6_11692_0_1	307.375	342.852	271.898	0.793049	-0.334518	0.0949984	0.844208
1553	dd_Smed_v6_11693_0_1	471.399	456.243	486.555	1.06644	0.092799	0.63679	0.982892
1554	dd_Smed_v6_11695_0_1	225.318	212.051	238.586	1.12514	0.170099	0.448535	0.960203
1555	dd_Smed_v6_11696_0_1	149.355	145.932	152.777	1.04691	0.0661307	0.767558	0.999913
1556	dd_Smed_v6_11697_0_1	317.491	326.998	307.984	0.941853	-0.0864262	0.684309	0.988947
1557	dd_Smed_v6_11699_0_1	176.873	192.746	161	0.835295	-0.259642	0.24609	0.898458
1558	dd_Smed_v6_1169_0_1	1115.81	1183.49	1048.13	0.885624	-0.175233	0.4643	0.96106
1559	dd_Smed_v6_116_0_1	10043	10209.1	9876.81	0.967449	-0.0477425	0.798975	1
1560	dd_Smed_v6_11700_0_1	272.114	244.682	299.547	1.22423	0.291875	0.156339	0.861426
1561	dd_Smed_v6_11702_0_1	431.718	418.195	445.241	1.06467	0.0904106	0.665218	0.988675
1562	dd_Smed_v6_11704_0_1	199.522	219.839	179.205	0.815166	-0.294835	0.190185	0.871776
1563	dd_Smed_v6_11705_0_1	47.9828	43.1733	52.7923	1.2228	0.290188	0.306063	0.924271
1564	dd_Smed_v6_11706_0_1	118.999	103.859	134.139	1.29155	0.369105	0.122347	0.854458
1565	dd_Smed_v6_11707_0_1	371.817	414.667	328.968	0.79333	-0.334007	0.104286	0.848729
1566	dd_Smed_v6_11708_0_1	176.453	189.532	163.375	0.86199	-0.214256	0.318509	0.927702
1567	dd_Smed_v6_1170_0_1	10109.8	8973.16	11246.4	1.25334	0.325776	0.0775542	0.844208
1568	dd_Smed_v6_11710_0_1	480.578	471.291	489.864	1.03941	0.0557632	0.785529	1
1569	dd_Smed_v6_11711_0_1	339.091	379.766	298.415	0.785785	-0.347793	0.0888206	0.844208
1570	dd_Smed_v6_11714_0_1	261.98	285.105	238.855	0.83778	-0.255357	0.315385	0.926174
1571	dd_Smed_v6_11715_0_1	130.696	138.652	122.741	0.885245	-0.175852	0.456881	0.960203
1572	dd_Smed_v6_11717_0_1	43.3664	44.0704	42.6623	0.96805	-0.0468472	0.91469	1
1573	dd_Smed_v6_11718_0_1	189.974	191.806	188.141	0.980893	-0.0278328	0.873234	1
1574	dd_Smed_v6_11719_0_1	187.841	199.033	176.648	0.887532	-0.17213	0.427597	0.954407
1575	dd_Smed_v6_1171_0_1	8489.33	8800.6	8178.06	0.929261	-0.105843	0.577735	0.976959
1576	dd_Smed_v6_11720_0_1	200.542	217.489	183.596	0.844158	-0.244415	0.257972	0.908396
1577	dd_Smed_v6_11721_0_1	46.5341	48.0635	45.0048	0.93636	-0.0948651	0.830265	1
1578	dd_Smed_v6_11722_0_1	16.1815	16.6081	15.7549	0.948628	-0.0760851	0.948353	1
1579	dd_Smed_v6_11723_0_1	47.3028	49.0215	45.584	0.929878	-0.104887	0.7516	0.996389
1580	dd_Smed_v6_11724_0_1	126.785	135.61	117.96	0.869853	-0.201156	0.379632	0.940245
1581	dd_Smed_v6_11725_0_1	558.693	570.074	547.312	0.960071	-0.0587877	0.77808	1
1582	dd_Smed_v6_11728_0_1	581.637	588.137	575.136	0.977895	-0.0322486	0.869752	1
1583	dd_Smed_v6_11729_0_1	178.05	173.705	182.396	1.05003	0.0704333	0.750486	0.996389
1584	dd_Smed_v6_1172_0_1	961.966	914.092	1009.84	1.10475	0.143714	0.44086	0.960203
1585	dd_Smed_v6_11730_0_1	793.978	774.982	812.975	1.04902	0.0690484	0.707608	0.991224
1586	dd_Smed_v6_11731_0_1	160.094	159.387	160.801	1.00887	0.0127428	0.984379	1
1587	dd_Smed_v6_11734_0_1	159.251	177.035	141.467	0.799091	-0.323568	0.471687	0.961609
1588	dd_Smed_v6_11735_0_1	162.338	157.892	166.784	1.05632	0.0790411	0.750893	0.996389
1589	dd_Smed_v6_11736_0_1	192.958	202.092	183.824	0.909608	-0.136684	0.499659	0.965145
1590	dd_Smed_v6_11737_0_1	173.35	161.745	184.956	1.1435	0.193461	0.397281	0.94584
1591	dd_Smed_v6_11738_0_2	72.6209	78.9132	66.3287	0.840527	-0.250634	0.675363	0.98891
1592	dd_Smed_v6_11739_0_1	202.816	206.498	199.135	0.964345	-0.0523785	0.801039	1
1593	dd_Smed_v6_1173_0_1	1481.59	1455.44	1507.74	1.03594	0.0509371	0.800692	1
1594	dd_Smed_v6_11741_0_1	258.978	277.023	240.934	0.869724	-0.201371	0.345376	0.929132
1595	dd_Smed_v6_11742_0_1	357.948	412.778	303.119	0.73434	-0.445481	0.0394715	0.79056
1596	dd_Smed_v6_11743_0_1	396.732	395.57	397.894	1.00588	0.00845366	0.980773	1
1597	dd_Smed_v6_11744_0_1	337.737	331.305	344.169	1.03883	0.0549602	0.783532	1
1598	dd_Smed_v6_11746_0_1	182.875	183.921	181.829	0.988622	-0.0165091	0.940193	1
1599	dd_Smed_v6_11747_0_1	100.929	108.147	93.711	0.866512	-0.206709	0.4074	0.950289
1600	dd_Smed_v6_11748_0_1	239.062	267.751	210.373	0.785703	-0.347944	0.0959006	0.844208
1601	dd_Smed_v6_1174_0_1	4187.6	4021.43	4353.77	1.08264	0.114557	0.528893	0.968961
1602	dd_Smed_v6_11751_0_1	60.3078	56.11	64.5056	1.14963	0.201168	0.486406	0.962902
1603	dd_Smed_v6_11753_0_1	147.3	136.995	157.606	1.15046	0.202207	0.377414	0.939383
1604	dd_Smed_v6_11754_0_1	79.715	74.2588	85.1713	1.14695	0.197805	0.40019	0.947739
1605	dd_Smed_v6_11755_0_1	255.043	232.261	277.825	1.19618	0.258429	0.215454	0.882103
1606	dd_Smed_v6_11756_0_1	159.851	161.674	158.028	0.97745	-0.0329046	0.888281	1
1607	dd_Smed_v6_11757_0_1	179.455	178.692	180.218	1.00854	0.0122666	0.950039	1
1608	dd_Smed_v6_11759_0_1	23.1613	22.2696	24.0531	1.08009	0.111146	0.795609	1
1609	dd_Smed_v6_1175_0_1	1034.53	1098.16	970.905	0.884118	-0.177689	0.381668	0.941255
1610	dd_Smed_v6_11761_0_1	137.895	137.577	138.213	1.00462	0.00665559	0.981085	1
1611	dd_Smed_v6_11762_0_1	125.567	120.751	130.383	1.07977	0.110722	0.649542	0.98488
1612	dd_Smed_v6_11763_0_1	261.946	278.044	245.849	0.884208	-0.177542	0.385074	0.942285
1613	dd_Smed_v6_11764_0_1	82.1865	84.5741	79.7989	0.943538	-0.083847	0.760429	0.998749
1614	dd_Smed_v6_11765_0_1	294.863	290.291	299.435	1.0315	0.0447457	0.85659	1
1615	dd_Smed_v6_11766_0_1	101.875	97.6419	106.109	1.08671	0.119969	0.626284	0.979876
1616	dd_Smed_v6_11767_0_1	377.47	396.827	358.114	0.902443	-0.148093	0.458828	0.960203
1617	dd_Smed_v6_11768_0_1	50.3497	54.1081	46.5913	0.861079	-0.215782	0.63027	0.980928
1618	dd_Smed_v6_11769_0_1	151.243	160.672	141.815	0.882642	-0.1801	0.444606	0.960203
1619	dd_Smed_v6_1176_0_1	2633.48	2549.32	2717.65	1.06603	0.092247	0.612315	0.978821
1620	dd_Smed_v6_11770_0_1	251.754	261.076	242.431	0.928586	-0.106892	0.606698	0.978821
1621	dd_Smed_v6_11772_0_1	247.721	243.287	252.155	1.03645	0.0516495	0.802952	1
1622	dd_Smed_v6_11774_0_1	52.6218	60.6297	44.6138	0.73584	-0.442536	0.186847	0.871776
1623	dd_Smed_v6_11775_0_1	150.186	150.161	150.211	1.00033	0.000478	1	1
1624	dd_Smed_v6_11778_0_1	339.615	359.152	320.079	0.891208	-0.166165	0.405097	0.950255
1625	dd_Smed_v6_1177_0_1	793.002	735.81	850.193	1.15545	0.208458	0.279431	0.915297
1626	dd_Smed_v6_11780_0_1	161.249	170.779	151.718	0.888385	-0.170743	0.467105	0.96106
1627	dd_Smed_v6_11785_0_1	43.3786	41.0296	45.7275	1.1145	0.156397	0.752384	0.996389
1628	dd_Smed_v6_11786_0_1	195.486	201.49	189.482	0.940401	-0.0886517	0.695518	0.989137
1629	dd_Smed_v6_11787_0_1	274.012	316.755	231.269	0.730118	-0.453798	0.0271306	0.748244
1630	dd_Smed_v6_11788_0_4	1.44229	1.66878	1.2158	0.728557	-0.456887	0.893585	1
1631	dd_Smed_v6_1178_0_1	1149.17	1050.23	1248.11	1.18842	0.249043	0.189404	0.871776
1632	dd_Smed_v6_11790_0_1	41.0782	50.4244	31.732	0.629298	-0.668184	0.229725	0.886658
1633	dd_Smed_v6_11791_0_1	41.5009	38.4946	44.5071	1.15619	0.209379	0.527243	0.968961
1634	dd_Smed_v6_11792_0_1	92.9078	81.564	104.252	1.27816	0.354064	0.153557	0.861426
1635	dd_Smed_v6_11793_0_1	89.1359	86.6742	91.5975	1.0568	0.0797057	0.781633	1
1636	dd_Smed_v6_11794_1_1	195.946	191.795	200.097	1.04328	0.0611332	0.793463	1
1637	dd_Smed_v6_11797_0_1	218.477	234.774	202.179	0.861167	-0.215634	0.361165	0.931846
1638	dd_Smed_v6_11799_0_1	418.772	436.147	401.398	0.920327	-0.119781	0.561767	0.973935
1639	dd_Smed_v6_1179_0_1	16647.2	16457.7	16836.8	1.02304	0.0328602	0.857069	1
1640	dd_Smed_v6_117_0_1	9166.88	8746.16	9587.6	1.09621	0.13252	0.459829	0.960282
1641	dd_Smed_v6_11800_0_1	221.355	227.99	214.72	0.941797	-0.0865118	0.686933	0.989033
1642	dd_Smed_v6_11801_0_1	157.811	188.203	127.418	0.677028	-0.562713	0.122793	0.854458
1643	dd_Smed_v6_11802_0_1	12.5675	11.5956	13.5394	1.16762	0.223576	0.725113	0.993869
1644	dd_Smed_v6_11804_0_1	256.271	243.037	269.505	1.10891	0.149139	0.468027	0.96106
1645	dd_Smed_v6_11805_0_1	199.696	218.574	180.818	0.827263	-0.273581	0.194892	0.874938
1646	dd_Smed_v6_11807_0_1	458.186	470.348	446.024	0.948284	-0.076609	0.711828	0.992264
1647	dd_Smed_v6_11809_0_1	363.017	431.959	294.076	0.680797	-0.554704	0.037644	0.790024
1648	dd_Smed_v6_1180_0_1	4253.56	4221.69	4285.42	1.0151	0.021616	0.901104	1
1649	dd_Smed_v6_11811_0_1	178.09	148.234	207.946	1.40282	0.488333	0.103244	0.848514
1650	dd_Smed_v6_11813_0_1	2.23092	2.65166	1.81017	0.682654	-0.550774	0.67527	0.98891
1651	dd_Smed_v6_11814_0_1	437.585	454.739	420.431	0.924554	-0.11317	0.575288	0.976959
1652	dd_Smed_v6_11815_0_1	30.3133	35.8801	24.7466	0.689704	-0.53595	0.398726	0.947063
1653	dd_Smed_v6_11817_0_1	128.348	119.027	137.669	1.15662	0.209918	0.360987	0.931806
1654	dd_Smed_v6_11818_0_1	293.024	309.461	276.586	0.893767	-0.16203	0.444824	0.960203
1655	dd_Smed_v6_1181_0_1	3278.43	3509.99	3046.87	0.868056	-0.20414	0.274056	0.912338
1656	dd_Smed_v6_11820_0_1	48.1226	58.3971	37.8481	0.648117	-0.625674	0.0463812	0.807435
1657	dd_Smed_v6_11821_0_1	97.9027	95.8545	99.9509	1.04274	0.0603745	0.822649	1
1658	dd_Smed_v6_11822_0_1	68.537	81.0681	56.0058	0.690848	-0.533559	0.160038	0.861426
1659	dd_Smed_v6_11823_0_1	134.36	120.109	148.612	1.23731	0.307209	0.232682	0.88815
1660	dd_Smed_v6_11824_0_1	782.049	922.024	642.075	0.696375	-0.522064	0.0933261	0.844208
1661	dd_Smed_v6_11826_0_1	410.718	436.828	384.609	0.880458	-0.183674	0.355984	0.929607
1662	dd_Smed_v6_11827_0_1	176.309	191.8	160.818	0.838467	-0.254175	0.244084	0.898161
1663	dd_Smed_v6_11828_0_1	482.436	456.349	508.524	1.11433	0.156177	0.439897	0.960189
1664	dd_Smed_v6_11829_0_1	23.3489	15.9839	30.7138	1.92154	0.942266	0.253977	0.905544
1665	dd_Smed_v6_1182_0_1	733.84	830.047	637.633	0.768189	-0.380468	0.416105	0.951598
1666	dd_Smed_v6_11830_0_1	249.835	258.856	240.813	0.9303	-0.104233	0.628124	0.979876
1667	dd_Smed_v6_11831_0_1	92.7954	93.5727	92.0181	0.983387	-0.0241688	0.947386	1
1668	dd_Smed_v6_11832_0_1	354.172	359.671	348.673	0.969422	-0.0448027	0.822055	1
1669	dd_Smed_v6_11833_0_1	156.606	152.342	160.869	1.05597	0.078569	0.748354	0.996389
1670	dd_Smed_v6_11834_0_1	266.539	314.74	218.338	0.693711	-0.527594	0.0819394	0.844208
1671	dd_Smed_v6_11835_0_1	13.3668	10.2851	16.4485	1.59925	0.677397	0.094625	0.844208
1672	dd_Smed_v6_11836_0_1	49.4771	51.7661	47.1882	0.911566	-0.133581	0.728584	0.993869
1673	dd_Smed_v6_11837_0_1	358.084	337.733	378.436	1.12052	0.164169	0.410592	0.950568
1674	dd_Smed_v6_11838_0_1	265.377	279.293	251.46	0.900346	-0.151448	0.500585	0.965145
1675	dd_Smed_v6_11839_0_1	181.537	164.883	198.191	1.20201	0.265453	0.238793	0.891716
1676	dd_Smed_v6_1183_0_1	784.454	862.981	705.927	0.81801	-0.28981	0.499309	0.965145
1677	dd_Smed_v6_11840_0_1	247.558	254.277	240.838	0.947149	-0.0783374	0.719516	0.992946
1678	dd_Smed_v6_11841_0_1	100.007	116.827	83.1869	0.712049	-0.489951	0.172568	0.862094
1679	dd_Smed_v6_11843_0_1	274.349	260.222	288.475	1.10857	0.148702	0.488569	0.96416
1680	dd_Smed_v6_11845_0_1	466.38	521.794	410.965	0.7876	-0.344465	0.0852099	0.844208
1681	dd_Smed_v6_11846_0_1	17.8322	14.6302	21.0343	1.43774	0.523798	0.244578	0.898358
1682	dd_Smed_v6_11847_0_1	272.48	343.797	201.164	0.585125	-0.773182	0.0161279	0.667071
1683	dd_Smed_v6_11848_0_1	71.9001	79.0472	64.753	0.819169	-0.287768	0.316889	0.927531
1684	dd_Smed_v6_1184_0_1	4434.86	4093.05	4776.68	1.16702	0.222831	0.291713	0.91846
1685	dd_Smed_v6_11850_0_1	26.8583	29.5446	24.1721	0.818156	-0.289553	0.400344	0.947876
1686	dd_Smed_v6_11851_0_1	682.157	812.08	552.234	0.680024	-0.556342	0.00511294	0.599398
1687	dd_Smed_v6_11852_0_1	138.417	131.104	145.73	1.11156	0.152592	0.528334	0.968961
1688	dd_Smed_v6_11853_0_1	130.069	118.984	141.153	1.18631	0.246486	0.288242	0.917484
1689	dd_Smed_v6_11855_0_1	154.327	161.798	146.855	0.907645	-0.1398	0.572819	0.976855
1690	dd_Smed_v6_11856_0_1	21.3187	21.2377	21.3997	1.00763	0.0109625	1	1
1691	dd_Smed_v6_11857_0_1	318.906	360.108	277.704	0.771168	-0.374883	0.0650733	0.832931
1692	dd_Smed_v6_11858_0_1	60.0895	66.4469	53.7321	0.808648	-0.306416	0.492005	0.964963
1693	dd_Smed_v6_11859_0_1	38.8043	39.8114	37.7973	0.949409	-0.0748989	0.86788	1
1694	dd_Smed_v6_1185_0_1	2226.32	2202.24	2250.39	1.02186	0.0312032	0.843103	1
1695	dd_Smed_v6_11860_0_1	115.55	112.334	118.766	1.05726	0.0803247	0.690229	0.989137
1696	dd_Smed_v6_11861_0_1	42.236	46.8381	37.6339	0.803488	-0.315652	0.534597	0.970603
1697	dd_Smed_v6_11862_0_1	155.332	143.688	166.975	1.16207	0.216692	0.314159	0.925818
1698	dd_Smed_v6_11863_0_1	43.2576	32.5486	53.9666	1.65803	0.729473	0.0132117	0.667071
1699	dd_Smed_v6_11866_0_1	22.3218	20.218	24.4257	1.20811	0.272755	0.490296	0.964963
1700	dd_Smed_v6_11867_0_1	4.61421	7.6397	1.58872	0.207956	-2.26565	0.015869	0.667071
1701	dd_Smed_v6_11868_0_1	23.582	18.2463	28.9177	1.58485	0.664349	0.18758	0.871776
1702	dd_Smed_v6_11869_0_1	17.2721	11.8987	22.6454	1.90318	0.928415	0.116719	0.849478
1703	dd_Smed_v6_1186_0_1	969.325	933.504	1005.15	1.07675	0.106678	0.564098	0.974769
1704	dd_Smed_v6_11870_0_1	4.27271	4.62968	3.91574	0.845791	-0.241627	0.870631	1
1705	dd_Smed_v6_11871_0_1	15.2024	18.2217	12.1832	0.668613	-0.580756	0.332095	0.929132
1706	dd_Smed_v6_11872_0_1	154.609	155.767	153.451	0.985132	-0.0216109	0.884965	1
1707	dd_Smed_v6_11873_0_1	194.204	192.417	195.99	1.01857	0.0265489	0.91751	1
1708	dd_Smed_v6_11874_0_1	394.972	413.795	376.149	0.909022	-0.137612	0.493907	0.964963
1709	dd_Smed_v6_11876_0_1	480.688	449.355	512.021	1.13946	0.188349	0.345452	0.929132
1710	dd_Smed_v6_11877_0_1	147.213	185.689	108.737	0.585586	-0.772047	0.0225679	0.726306
1711	dd_Smed_v6_11879_0_1	374.008	385.205	362.811	0.941867	-0.0864051	0.678572	0.98891
1712	dd_Smed_v6_1187_0_1	4675.38	4853.79	4496.96	0.926483	-0.110163	0.551657	0.971927
1713	dd_Smed_v6_11881_0_1	6.50345	4.97562	8.03127	1.61412	0.690752	0.293247	0.919014
1714	dd_Smed_v6_11882_0_1	370.602	406.48	334.724	0.823471	-0.280209	0.157482	0.861426
1715	dd_Smed_v6_11883_0_1	210.817	194.11	227.525	1.17215	0.229153	0.320198	0.928433
1716	dd_Smed_v6_11884_0_1	371.476	364.426	378.526	1.03869	0.0547646	0.791728	1
1717	dd_Smed_v6_11885_0_1	357.536	365.028	350.044	0.958952	-0.06047	0.749002	0.996389
1718	dd_Smed_v6_11886_0_1	360.219	343.352	377.087	1.09825	0.135212	0.515979	0.967326
1719	dd_Smed_v6_11887_0_1	562.935	581.473	544.398	0.936239	-0.0950517	0.634528	0.982622
1720	dd_Smed_v6_11888_0_1	141.479	152.479	130.48	0.85573	-0.224772	0.32899	0.929132
1721	dd_Smed_v6_1188_0_1	236.175	199.622	272.728	1.36622	0.45019	0.0310982	0.773456
1722	dd_Smed_v6_11890_0_1	198.445	230.975	165.916	0.718329	-0.477284	0.027434	0.750865
1723	dd_Smed_v6_11891_0_1	257.391	278.553	236.229	0.848056	-0.237769	0.252431	0.90423
1724	dd_Smed_v6_11892_0_1	278.543	261.991	295.094	1.12635	0.171655	0.418498	0.952505
1725	dd_Smed_v6_11893_0_1	50.8851	41.1101	60.6601	1.47555	0.561257	0.0443178	0.807435
1726	dd_Smed_v6_11894_0_1	336.136	302.059	370.212	1.22563	0.29352	0.147636	0.860292
1727	dd_Smed_v6_11895_0_1	249.378	252.24	246.516	0.977307	-0.0331169	0.875278	1
1728	dd_Smed_v6_11896_0_1	36.0262	34.5697	37.4828	1.08426	0.116717	0.857939	1
1729	dd_Smed_v6_11898_0_1	35.6805	34.5757	36.7852	1.0639	0.0893672	0.781331	1
1730	dd_Smed_v6_11899_0_1	4.92549	5.97673	3.87426	0.648223	-0.625438	0.482856	0.962187
1731	dd_Smed_v6_1189_0_1	1777.59	1720	1835.18	1.06697	0.0935152	0.608519	0.978821
1732	dd_Smed_v6_11900_0_1	2.3813	2.65162	2.11097	0.796106	-0.328967	0.867912	1
1733	dd_Smed_v6_11901_0_1	65.0796	67.7242	62.435	0.9219	-0.117318	0.652247	0.985339
1734	dd_Smed_v6_11902_0_1	31.1529	27.5665	34.7392	1.26019	0.333646	0.338472	0.929132
1735	dd_Smed_v6_11903_0_1	194.244	210.845	177.642	0.842523	-0.247211	0.378207	0.93995
1736	dd_Smed_v6_11904_0_1	288.205	326.408	250.002	0.765921	-0.384733	0.0655925	0.832931
1737	dd_Smed_v6_11905_0_1	667.315	690.742	643.888	0.932168	-0.101338	0.609738	0.978821
1738	dd_Smed_v6_11906_0_1	550.419	540.886	559.952	1.03525	0.0499793	0.782338	1
1739	dd_Smed_v6_11908_0_1	46.0765	50.4302	41.7227	0.827337	-0.273453	0.339681	0.929132
1740	dd_Smed_v6_11909_0_1	160.882	157.8	163.963	1.03905	0.0552668	0.817432	1
1741	dd_Smed_v6_1190_0_1	1054.61	1024.38	1084.85	1.05903	0.0827452	0.650922	0.985339
1742	dd_Smed_v6_11910_0_1	187.136	185.349	188.922	1.01928	0.027545	0.924442	1
1743	dd_Smed_v6_11911_0_1	6.32718	6.31063	6.34372	1.00524	0.00754651	1	1
1744	dd_Smed_v6_11912_0_1	394.702	393.85	395.554	1.00432	0.00622565	0.979021	1
1745	dd_Smed_v6_11913_0_1	0.141381	0	0.282761	Inf	Inf	1	1
1746	dd_Smed_v6_11914_0_1	99.5173	98.561	100.474	1.0194	0.0277266	0.938804	1
1747	dd_Smed_v6_11915_0_1	69.9214	71.3526	68.4902	0.959884	-0.0590687	0.815111	1
1748	dd_Smed_v6_11917_0_1	395.552	403.733	387.371	0.959474	-0.0596841	0.752016	0.996389
1749	dd_Smed_v6_11918_0_1	97.7081	94.6855	100.731	1.06384	0.0892876	0.71872	0.992946
1750	dd_Smed_v6_1191_0_1	255.097	267.63	242.564	0.906342	-0.141873	0.799304	1
1751	dd_Smed_v6_11920_0_1	91.1161	106.752	75.4805	0.707067	-0.500082	0.138962	0.858367
1752	dd_Smed_v6_11921_0_1	82.6338	81.772	83.4956	1.02108	0.0300933	0.928455	1
1753	dd_Smed_v6_11922_0_1	183.993	193.743	174.244	0.899359	-0.153032	0.475877	0.962187
1754	dd_Smed_v6_11923_0_1	184.766	206.748	162.784	0.787354	-0.344916	0.228741	0.886658
1755	dd_Smed_v6_11924_0_1	24.144	27.5423	20.7458	0.753235	-0.408829	0.269258	0.910799
1756	dd_Smed_v6_11926_0_1	109.297	122.816	95.7777	0.77985	-0.358732	0.221135	0.882847
1757	dd_Smed_v6_11926_1_1	91.1709	110.046	72.2955	0.656956	-0.606131	0.0229095	0.729668
1758	dd_Smed_v6_11927_0_1	187.672	184.015	191.33	1.03975	0.0562408	0.809535	1
1759	dd_Smed_v6_11928_0_1	62.8266	59.9808	65.6723	1.09489	0.130785	0.614806	0.979191
1760	dd_Smed_v6_1192_0_1	1064.5	998.615	1130.38	1.13195	0.178811	0.340697	0.929132
1761	dd_Smed_v6_11930_0_1	231.664	265.046	198.282	0.748104	-0.41869	0.18751	0.871776
1762	dd_Smed_v6_11931_0_1	204.845	207.449	202.241	0.974895	-0.0366818	0.884438	1
1763	dd_Smed_v6_11933_0_1	40.4106	44.4605	36.3607	0.817821	-0.290144	0.628009	0.979876
1764	dd_Smed_v6_11934_0_1	303.966	352.395	255.537	0.725141	-0.463666	0.121325	0.854458
1765	dd_Smed_v6_11935_0_1	76.6675	76.2909	77.044	1.00987	0.0141716	1	1
1766	dd_Smed_v6_11936_0_1	332.806	416.402	249.21	0.598484	-0.740615	0.0895225	0.844208
1767	dd_Smed_v6_11937_0_1	84.2898	91.1631	77.4166	0.84921	-0.235807	0.321521	0.928833
1768	dd_Smed_v6_11939_0_1	190.965	181.975	199.954	1.0988	0.135931	0.512163	0.96732
1769	dd_Smed_v6_1193_0_1	1379.22	1149.35	1609.09	1.40001	0.485433	0.0102155	0.655775
1770	dd_Smed_v6_11941_0_1	135.505	125.32	145.69	1.16254	0.217286	0.351307	0.929132
1771	dd_Smed_v6_11942_0_1	133.263	145.108	121.417	0.836735	-0.257158	0.322097	0.928833
1772	dd_Smed_v6_11943_0_1	126.392	129.958	122.825	0.945107	-0.0814498	0.818785	1
1773	dd_Smed_v6_11944_0_1	288.185	298.449	277.92	0.931215	-0.102813	0.605857	0.978821
1774	dd_Smed_v6_11945_0_10	117.253	114.879	119.627	1.04133	0.0584282	0.806418	1
1775	dd_Smed_v6_11946_0_1	68.7801	58.4654	79.0948	1.35285	0.436	0.179097	0.866457
1776	dd_Smed_v6_11947_0_1	861.641	762.39	960.892	1.26037	0.333845	0.0830265	0.844208
1777	dd_Smed_v6_11948_0_1	658.582	670.037	647.128	0.965809	-0.0501895	0.7969	1
1778	dd_Smed_v6_1194_0_1	4387.75	4329.01	4446.49	1.02714	0.0386314	0.821004	1
1779	dd_Smed_v6_11951_0_1	265.955	280.437	251.473	0.896718	-0.157274	0.451798	0.960203
1780	dd_Smed_v6_11953_0_1	96.7597	90.6061	102.913	1.13583	0.183751	0.451463	0.960203
1781	dd_Smed_v6_11954_0_1	37.3818	38.7979	35.9658	0.927005	-0.109352	0.752846	0.996389
1782	dd_Smed_v6_11955_0_1	218.037	218.73	217.344	0.993662	-0.00917333	0.942817	1
1783	dd_Smed_v6_11956_0_1	38.8262	42.7541	34.8983	0.816255	-0.292908	0.626348	0.979876
1784	dd_Smed_v6_11957_0_1	917.699	985.196	850.203	0.862978	-0.212604	0.267187	0.910798
1785	dd_Smed_v6_11958_0_1	372.673	433.011	312.335	0.72131	-0.471309	0.125617	0.855463
1786	dd_Smed_v6_11959_0_1	79.6111	102.177	57.0452	0.558298	-0.840894	0.0399817	0.795886
1787	dd_Smed_v6_1195_0_1	2205.7	2006.42	2404.99	1.19865	0.261407	0.161543	0.861426
1788	dd_Smed_v6_11960_0_1	23.3924	19.3026	27.4823	1.42376	0.509702	0.26223	0.909157
1789	dd_Smed_v6_11961_0_1	62.8955	63.4715	62.3195	0.98185	-0.0264254	0.928055	1
1790	dd_Smed_v6_11962_0_1	417.292	440.4	394.183	0.895057	-0.159949	0.441447	0.960203
1791	dd_Smed_v6_11963_0_1	277.878	272.494	283.262	1.03952	0.0559145	0.800231	1
1792	dd_Smed_v6_11964_0_1	117.575	122.542	112.608	0.918934	-0.121967	0.605222	0.978821
1793	dd_Smed_v6_11967_0_1	89.1768	81.402	96.9516	1.19102	0.2522	0.307872	0.924271
1794	dd_Smed_v6_11968_0_1	123.541	137.262	109.82	0.800074	-0.321794	0.479211	0.962187
1795	dd_Smed_v6_11969_0_1	417.766	458.02	377.512	0.824227	-0.278886	0.153181	0.861426
1796	dd_Smed_v6_1196_0_1	5461.9	6299.6	4624.21	0.734049	-0.446051	0.017592	0.667071
1797	dd_Smed_v6_11970_0_1	97.477	97.2202	97.7339	1.00528	0.00760301	1	1
1798	dd_Smed_v6_11972_0_1	496.145	530.384	461.905	0.870887	-0.199442	0.308336	0.924271
1799	dd_Smed_v6_11973_0_1	83.7503	82.9244	84.5762	1.01992	0.0284546	0.93546	1
1800	dd_Smed_v6_11974_0_1	110.737	123.898	97.5767	0.787556	-0.344546	0.150478	0.860292
1801	dd_Smed_v6_11975_0_1	267.273	254.919	279.627	1.09693	0.133466	0.523345	0.968738
1802	dd_Smed_v6_11976_0_1	221.271	231.715	210.828	0.909858	-0.136286	0.524105	0.96895
1803	dd_Smed_v6_1197_0_1	5298.65	4937.67	5659.64	1.14622	0.196881	0.361793	0.932807
1804	dd_Smed_v6_11981_0_1	612.559	624.732	600.385	0.961028	-0.0573494	0.769313	1
1805	dd_Smed_v6_11982_0_1	68.5051	77.0201	59.99	0.778888	-0.360511	0.15932	0.861426
1806	dd_Smed_v6_11983_0_1	49.058	60.1886	37.9275	0.630145	-0.666245	0.292924	0.918665
1807	dd_Smed_v6_11984_0_1	339.308	322.467	356.149	1.10445	0.143329	0.482597	0.962187
1808	dd_Smed_v6_11987_0_1	643.642	616.486	670.798	1.0881	0.121811	0.531574	0.96968
1809	dd_Smed_v6_11988_0_1	48.1483	44.9978	51.2987	1.14003	0.189068	0.651668	0.985339
1810	dd_Smed_v6_1198_0_1	2156.23	1977.13	2335.34	1.18118	0.240225	0.188752	0.871776
1811	dd_Smed_v6_11990_0_1	130.742	131.52	129.963	0.988166	-0.0171754	0.959299	1
1812	dd_Smed_v6_11991_0_1	95.0006	100.012	89.989	0.89978	-0.152357	0.62389	0.979755
1813	dd_Smed_v6_11992_0_1	197.967	171.629	224.306	1.30692	0.386175	0.075191	0.844208
1814	dd_Smed_v6_11993_0_1	575.38	625.026	525.733	0.841137	-0.249587	0.210242	0.882103
1815	dd_Smed_v6_11994_0_1	140.694	139.889	141.498	1.01151	0.0165059	0.955221	1
1816	dd_Smed_v6_11995_0_1	400.102	417.776	382.428	0.915391	-0.12754	0.559699	0.97341
1817	dd_Smed_v6_11997_0_1	162.013	168.165	155.861	0.926835	-0.109615	0.619255	0.979737
1818	dd_Smed_v6_11998_0_1	39.5495	46.1769	32.9222	0.712958	-0.48811	0.261256	0.908881
1819	dd_Smed_v6_1199_0_1	10395.8	10994.1	9797.45	0.891157	-0.166249	0.372942	0.937226
1820	dd_Smed_v6_11_0_1	73059.4	62580	83538.9	1.33491	0.416747	0.0518581	0.827484
1821	dd_Smed_v6_12000_0_1	81.9273	81.031	82.8236	1.02212	0.0315689	0.923825	1
1822	dd_Smed_v6_12001_0_1	105.917	85.1535	126.681	1.48768	0.57306	0.0425142	0.807435
1823	dd_Smed_v6_12002_0_1	364.007	331.896	396.118	1.1935	0.255196	0.208598	0.882103
1824	dd_Smed_v6_12003_0_1	384.007	435.855	332.158	0.762083	-0.39198	0.322274	0.928833
1825	dd_Smed_v6_12004_0_1	50.4796	56.729	44.2301	0.779673	-0.35906	0.50102	0.965145
1826	dd_Smed_v6_12006_0_1	128.573	127.555	129.591	1.01597	0.0228549	0.94293	1
1827	dd_Smed_v6_12007_0_1	25.4987	32.3337	18.6637	0.57722	-0.792807	0.348918	0.929132
1828	dd_Smed_v6_12008_0_1	331.489	370.437	292.541	0.789719	-0.340589	0.0883429	0.844208
1829	dd_Smed_v6_1200_0_1	1303.6	1240.96	1366.24	1.10095	0.138755	0.452574	0.960203
1830	dd_Smed_v6_12010_0_1	158.483	121.722	195.245	1.60402	0.681696	0.00225575	0.469119
1831	dd_Smed_v6_12011_0_1	286.287	271.738	300.836	1.10708	0.146758	0.484199	0.962577
1832	dd_Smed_v6_12013_0_1	53.3167	44.7686	61.8648	1.38188	0.466632	0.0804539	0.844208
1833	dd_Smed_v6_12014_0_1	34.9476	29.848	40.0471	1.3417	0.424066	0.212354	0.882103
1834	dd_Smed_v6_12016_0_1	151.703	136.451	166.956	1.22357	0.291091	0.190747	0.871776
1835	dd_Smed_v6_12017_0_1	1090.54	1163.73	1017.35	0.874211	-0.193947	0.310845	0.925449
1836	dd_Smed_v6_12018_0_1	325.963	347.644	304.282	0.875269	-0.192201	0.359798	0.931806
1837	dd_Smed_v6_12019_0_1	146.566	151.707	141.424	0.932219	-0.101259	0.65711	0.98644
1838	dd_Smed_v6_1201_0_1	1485.73	1439.7	1531.75	1.06394	0.0894155	0.637804	0.982892
1839	dd_Smed_v6_12020_0_1	155.488	174.574	136.402	0.781343	-0.355972	0.234029	0.888929
1840	dd_Smed_v6_12022_0_1	229.564	264.208	194.92	0.737753	-0.438791	0.0790754	0.844208
1841	dd_Smed_v6_12023_0_1	196.484	193.76	199.208	1.02812	0.0400041	0.848512	1
1842	dd_Smed_v6_12024_0_1	261.585	271.667	251.503	0.925774	-0.111267	0.598379	0.97785
1843	dd_Smed_v6_12026_0_1	138.278	143.651	132.905	0.925193	-0.112174	0.637144	0.982892
1844	dd_Smed_v6_12027_0_1	78.9001	84.1918	73.6084	0.874295	-0.193809	0.426424	0.953792
1845	dd_Smed_v6_12029_0_1	143.662	123.62	163.704	1.32425	0.405176	0.06589	0.833209
1846	dd_Smed_v6_1202_0_1	1299.23	1947.63	650.821	0.33416	-1.58139	0.128956	0.856634
1847	dd_Smed_v6_12031_0_1	67.4197	63.3979	71.4415	1.12688	0.172329	0.499034	0.965145
1848	dd_Smed_v6_12032_0_1	139.484	122.659	156.308	1.27433	0.349743	0.128623	0.856634
1849	dd_Smed_v6_12033_0_1	39.6273	48.3482	30.9064	0.639247	-0.645555	0.0385296	0.79056
1850	dd_Smed_v6_12035_0_1	120.112	117.637	122.586	1.04207	0.0594506	0.80954	1
1851	dd_Smed_v6_12036_0_1	240.706	232.255	249.158	1.07278	0.10135	0.623908	0.979755
1852	dd_Smed_v6_12037_0_1	307.254	306.596	307.912	1.00429	0.00618038	1	1
1853	dd_Smed_v6_12038_0_1	154.296	167.601	140.991	0.841227	-0.249433	0.266445	0.910688
1854	dd_Smed_v6_1203_0_1	3477.12	3337.6	3616.65	1.08361	0.115842	0.53685	0.971807
1855	dd_Smed_v6_12042_0_1	189.047	193.315	184.779	0.955844	-0.0651536	0.766409	0.999913
1856	dd_Smed_v6_12043_0_1	341.978	346.912	337.045	0.971559	-0.0416267	0.835003	1
1857	dd_Smed_v6_12046_0_1	315.863	342.658	289.067	0.843603	-0.245363	0.230254	0.886658
1858	dd_Smed_v6_12047_0_1	213.832	212.753	214.912	1.01015	0.0145629	0.969736	1
1859	dd_Smed_v6_12048_0_1	347.941	377.35	318.533	0.844131	-0.244462	0.239889	0.891716
1860	dd_Smed_v6_12049_0_1	93.9751	91.831	96.1192	1.0467	0.0658436	0.887189	1
1861	dd_Smed_v6_1204_0_1	1598.68	1615.01	1582.35	0.979773	-0.0294806	0.896521	1
1862	dd_Smed_v6_12050_0_1	429.884	486.565	373.204	0.767018	-0.382668	0.056695	0.827552
1863	dd_Smed_v6_12051_0_1	63.4647	72.0074	54.9219	0.762727	-0.390762	0.273726	0.912338
1864	dd_Smed_v6_12052_0_1	44.7968	44.7626	44.831	1.00153	0.00220391	1	1
1865	dd_Smed_v6_12053_0_1	82.9324	86.9406	78.9242	0.907795	-0.139562	0.567267	0.975603
1866	dd_Smed_v6_12054_0_1	41.7013	42.8151	40.5874	0.947968	-0.0770899	0.850859	1
1867	dd_Smed_v6_12055_0_1	183.925	190.707	177.144	0.928879	-0.106437	0.634903	0.982622
1868	dd_Smed_v6_12056_0_1	414.295	406.231	422.358	1.0397	0.0561649	0.771679	1
1869	dd_Smed_v6_12057_0_1	195.184	199.458	190.91	0.957141	-0.0631959	0.786829	1
1870	dd_Smed_v6_12058_0_1	385.888	412.75	359.026	0.869838	-0.201182	0.314313	0.925818
1871	dd_Smed_v6_12059_0_1	195.272	227.764	162.779	0.714684	-0.484623	0.177489	0.866457
1872	dd_Smed_v6_1205_0_1	7628.36	7087.15	8169.57	1.15273	0.205054	0.25989	0.908876
1873	dd_Smed_v6_12060_0_1	318.832	264.589	373.075	1.41002	0.495712	0.0145683	0.667071
1874	dd_Smed_v6_12061_0_1	39.1537	37.4748	40.8326	1.0896	0.123802	0.712554	0.992396
1875	dd_Smed_v6_12062_0_1	598.424	586.926	609.922	1.03918	0.0554453	0.763782	0.999793
1876	dd_Smed_v6_12063_0_1	261.6	229.294	293.906	1.28178	0.358153	0.0834264	0.844208
1877	dd_Smed_v6_12065_0_2	60.2607	54.5976	65.9237	1.20745	0.271959	0.392093	0.943264
1878	dd_Smed_v6_12066_0_1	591.348	570.977	611.718	1.07135	0.0994351	0.670562	0.988675
1879	dd_Smed_v6_12067_0_1	62.1472	57.0565	67.238	1.17845	0.236885	0.400391	0.947876
1880	dd_Smed_v6_12068_0_1	35.3391	35.8557	34.8225	0.971184	-0.0421829	0.947468	1
1881	dd_Smed_v6_12069_0_1	133.713	136.517	130.91	0.95893	-0.0605024	0.79534	1
1882	dd_Smed_v6_1206_0_1	2643.93	2587.52	2700.34	1.0436	0.0615667	0.742192	0.99503
1883	dd_Smed_v6_12071_0_1	54.2606	54.7564	53.7647	0.981888	-0.0263701	0.978165	1
1884	dd_Smed_v6_12072_0_1	162.579	180.566	144.593	0.800777	-0.320527	0.193239	0.874379
1885	dd_Smed_v6_12073_0_1	168.102	162.169	174.036	1.07317	0.101884	0.672859	0.988675
1886	dd_Smed_v6_12075_0_1	459.478	417.005	501.952	1.20371	0.267485	0.183868	0.868658
1887	dd_Smed_v6_12076_0_1	102.656	89.9017	115.41	1.28374	0.360349	0.126525	0.856547
1888	dd_Smed_v6_1207_0_1	7093.26	6920.93	7265.58	1.0498	0.0701127	0.712593	0.992396
1889	dd_Smed_v6_12080_0_1	58.1059	59.4101	56.8017	0.956095	-0.0647738	0.878704	1
1890	dd_Smed_v6_12081_0_1	62.3504	61.6617	63.0391	1.02234	0.0318734	0.91536	1
1891	dd_Smed_v6_12083_0_1	186.594	195.695	177.492	0.906981	-0.140855	0.506563	0.965707
1892	dd_Smed_v6_12085_0_1	64.0377	80.6632	47.4122	0.58778	-0.766652	0.112633	0.849478
1893	dd_Smed_v6_12088_0_1	6.71236	3.99912	9.42561	2.35692	1.2369	0.203582	0.880187
1894	dd_Smed_v6_12089_0_1	50.6716	50.3814	50.9619	1.01152	0.0165275	0.944357	1
1895	dd_Smed_v6_1208_0_1	4120.86	4114.58	4127.14	1.00305	0.00439772	0.971999	1
1896	dd_Smed_v6_12090_0_1	12.9942	13.6468	12.3416	0.904357	-0.145036	0.831023	1
1897	dd_Smed_v6_12091_0_1	106.143	116.374	95.9118	0.824171	-0.278985	0.336495	0.929132
1898	dd_Smed_v6_12093_0_1	12.1836	10.3034	14.0637	1.36496	0.448859	0.337595	0.929132
1899	dd_Smed_v6_12096_0_1	130.853	143.967	117.738	0.817814	-0.290155	0.461559	0.960998
1900	dd_Smed_v6_12097_0_1	285.865	264.409	307.322	1.1623	0.216982	0.283562	0.917169
1901	dd_Smed_v6_12098_0_1	31.2086	26.5595	35.8576	1.35008	0.433049	0.183503	0.868644
1902	dd_Smed_v6_12099_0_11	10.1063	8.96233	11.2502	1.25528	0.328004	0.587516	0.976959
1903	dd_Smed_v6_1209_0_1	3449.42	3401	3497.84	1.02847	0.0405054	0.820831	1
1904	dd_Smed_v6_120_0_1	1305.68	1073.21	1538.15	1.43322	0.519262	0.18187	0.868644
1905	dd_Smed_v6_12102_0_1	216.435	230.149	202.72	0.880818	-0.183084	0.371081	0.936085
1906	dd_Smed_v6_12103_0_1	104.988	107.844	102.132	0.947033	-0.0785127	0.743124	0.99503
1907	dd_Smed_v6_12104_0_1	258.957	255.111	262.804	1.03016	0.0428631	0.843611	1
1908	dd_Smed_v6_12105_0_1	1307.88	1379.06	1236.7	0.896771	-0.157189	0.40211	0.948943
1909	dd_Smed_v6_12106_0_1	111.645	103.678	119.613	1.1537	0.206265	0.397329	0.94584
1910	dd_Smed_v6_12107_0_1	117.316	135.757	98.8747	0.728323	-0.45735	0.0752303	0.844208
1911	dd_Smed_v6_12108_0_1	226.272	218.206	234.338	1.07393	0.102897	0.63101	0.981167
1912	dd_Smed_v6_12109_0_1	254.37	241.587	267.153	1.10582	0.145121	0.505419	0.965707
1913	dd_Smed_v6_1210_0_1	8023.9	7108.32	8939.47	1.25761	0.330681	0.0738823	0.844208
1914	dd_Smed_v6_12110_0_1	148.136	170.773	125.499	0.734886	-0.444407	0.0816634	0.844208
1915	dd_Smed_v6_12111_0_1	265.549	238.692	292.405	1.22503	0.292814	0.22783	0.886658
1916	dd_Smed_v6_12112_0_1	70.1441	70.241	70.0472	0.997241	-0.00398602	1	1
1917	dd_Smed_v6_12113_0_1	145.067	152.653	137.481	0.900606	-0.151032	0.633385	0.982401
1918	dd_Smed_v6_12114_0_1	89.7688	95.3243	84.2134	0.883441	-0.178794	0.5319	0.96968
1919	dd_Smed_v6_12115_0_1	348.626	382.236	315.015	0.824139	-0.27904	0.166513	0.862094
1920	dd_Smed_v6_12116_0_1	183.743	189.194	178.293	0.942381	-0.0856172	0.705828	0.991145
1921	dd_Smed_v6_12117_0_1	6.8609	7.65182	6.06998	0.793273	-0.33411	0.650336	0.985213
1922	dd_Smed_v6_12118_0_1	272.825	259.99	285.661	1.09874	0.135848	0.518165	0.96745
1923	dd_Smed_v6_12119_1_1	223.03	207.696	238.364	1.14766	0.198692	0.363638	0.933602
1924	dd_Smed_v6_1211_0_1	2071.37	2043.12	2099.62	1.02765	0.0393558	0.834322	1
1925	dd_Smed_v6_12122_0_1	412.314	437.99	386.637	0.882752	-0.179919	0.365117	0.934232
1926	dd_Smed_v6_12123_0_1	514.907	533.044	496.77	0.93195	-0.101676	0.601918	0.978821
1927	dd_Smed_v6_12125_0_1	4.14247	3.6468	4.63813	1.27184	0.346915	0.744911	0.99503
1928	dd_Smed_v6_12126_0_1	62.6194	66.6004	58.6383	0.880449	-0.183689	0.579463	0.976959
1929	dd_Smed_v6_12126_1_1	78.4673	77.3356	79.599	1.02927	0.0416172	0.872881	1
1930	dd_Smed_v6_12128_0_1	72.9123	75.7099	70.1146	0.926095	-0.110768	0.686454	0.989012
1931	dd_Smed_v6_1212_0_1	3836.75	3741.4	3932.11	1.05097	0.0717262	0.693471	0.989137
1932	dd_Smed_v6_12130_0_1	421.921	440.472	403.369	0.915766	-0.126949	0.530677	0.969011
1933	dd_Smed_v6_12132_0_1	48.8296	38.5445	59.1147	1.53368	0.616993	0.0344323	0.7875
1934	dd_Smed_v6_12133_0_1	95.7453	109.106	82.3844	0.755084	-0.40529	0.0913084	0.844208
1935	dd_Smed_v6_12135_0_1	169.453	152.274	186.632	1.22563	0.29352	0.180082	0.867738
1936	dd_Smed_v6_12136_0_1	237.614	274.213	201.014	0.733057	-0.448002	0.0908116	0.844208
1937	dd_Smed_v6_12138_0_1	12.5866	13.2583	11.9149	0.898676	-0.154127	0.784747	1
1938	dd_Smed_v6_12139_0_1	47.1301	44.2176	50.0425	1.13173	0.178534	0.586769	0.976959
1939	dd_Smed_v6_1213_0_1	2600.75	2594.11	2607.39	1.00512	0.007369	0.955083	1
1940	dd_Smed_v6_12140_0_1	398.057	394.862	401.251	1.01618	0.023155	0.899994	1
1941	dd_Smed_v6_12141_0_1	76.1244	75.2898	76.9589	1.02217	0.0316331	0.927391	1
1942	dd_Smed_v6_12142_0_1	150.642	138.918	162.366	1.16879	0.225017	0.304728	0.924271
1943	dd_Smed_v6_12144_0_1	99.0607	86.6017	111.52	1.28773	0.364831	0.137286	0.858367
1944	dd_Smed_v6_12145_0_1	134.811	131.881	137.742	1.04444	0.0627325	0.81567	1
1945	dd_Smed_v6_12146_0_1	362.588	370.712	354.464	0.956172	-0.0646583	0.75242	0.996389
1946	dd_Smed_v6_12147_0_1	6.61769	4.31434	8.92104	2.06776	1.04807	0.11224	0.849478
1947	dd_Smed_v6_12148_0_1	171.488	181.967	161.009	0.884824	-0.176538	0.479732	0.962187
1948	dd_Smed_v6_1214_0_1	1209.42	1438.57	980.265	0.681415	-0.553394	0.156009	0.861426
1949	dd_Smed_v6_12150_0_1	230.041	224.863	235.22	1.04606	0.0649606	0.778561	1
1950	dd_Smed_v6_12151_0_1	78.6001	73.79	83.4101	1.13037	0.176797	0.532164	0.96968
1951	dd_Smed_v6_12152_0_1	96.6221	92.159	101.085	1.09686	0.133376	0.598119	0.977738
1952	dd_Smed_v6_12153_0_2	83.3895	85.9887	80.7903	0.939545	-0.0899657	0.721626	0.993557
1953	dd_Smed_v6_12154_0_1	62.686	60.7704	64.6015	1.06304	0.0881982	0.874192	1
1954	dd_Smed_v6_12155_0_1	158.657	148.418	168.896	1.13797	0.186468	0.406641	0.950255
1955	dd_Smed_v6_12156_0_1	44.9139	51.122	38.7058	0.757126	-0.401394	0.413337	0.950859
1956	dd_Smed_v6_12157_0_1	85.3207	101.482	69.1595	0.681497	-0.553222	0.153885	0.861426
1957	dd_Smed_v6_12158_0_1	147.004	159.348	134.661	0.84507	-0.242857	0.302994	0.923921
1958	dd_Smed_v6_12159_0_1	92.6677	97.8141	87.5214	0.894773	-0.160407	0.506864	0.965707
1959	dd_Smed_v6_1215_0_1	2929.51	3108.63	2750.39	0.88476	-0.176642	0.348458	0.929132
1960	dd_Smed_v6_12160_0_1	350.691	394.372	307.009	0.778474	-0.36128	0.0730943	0.844208
1961	dd_Smed_v6_12161_0_1	285.858	277.593	294.123	1.05955	0.0834456	0.691803	0.989137
1962	dd_Smed_v6_12162_0_1	263.716	299.134	228.299	0.763201	-0.389865	0.063001	0.832931
1963	dd_Smed_v6_12164_0_1	14.8257	12.2936	17.3577	1.41193	0.497665	0.325181	0.928833
1964	dd_Smed_v6_12165_0_1	189.202	190.701	187.704	0.984282	-0.0228566	0.93401	1
1965	dd_Smed_v6_12166_0_1	318.788	321.308	316.267	0.984312	-0.022812	0.931648	1
1966	dd_Smed_v6_12168_0_1	283.804	309.43	258.178	0.834365	-0.261249	0.202751	0.879296
1967	dd_Smed_v6_12169_0_1	230.598	227.436	233.759	1.0278	0.0395617	0.88249	1
1968	dd_Smed_v6_1216_0_1	2875.21	2813.9	2936.52	1.04358	0.0615399	0.735732	0.994925
1969	dd_Smed_v6_12170_0_1	178.765	184.574	172.956	0.937056	-0.0937921	0.669778	0.988675
1970	dd_Smed_v6_12171_0_1	146.91	174.334	119.486	0.685386	-0.545011	0.0175525	0.667071
1971	dd_Smed_v6_12172_0_1	305.34	269.805	340.874	1.26341	0.337325	0.0976149	0.844208
1972	dd_Smed_v6_12173_0_1	124.988	119.33	130.645	1.09482	0.130695	0.551002	0.971902
1973	dd_Smed_v6_12174_0_1	192.572	205.734	179.409	0.872045	-0.197526	0.365615	0.934232
1974	dd_Smed_v6_12176_0_1	224.856	227.631	222.081	0.975621	-0.0356067	0.873405	1
1975	dd_Smed_v6_12177_0_1	396.6	420.49	372.71	0.88637	-0.174019	0.36919	0.934885
1976	dd_Smed_v6_12178_0_1	235.914	228.818	243.01	1.06202	0.0868124	0.67618	0.98891
1977	dd_Smed_v6_12179_0_1	202.83	194.557	211.103	1.08504	0.117753	0.602677	0.978821
1978	dd_Smed_v6_1217_0_1	611.022	622.564	599.48	0.96292	-0.0545124	0.909011	1
1979	dd_Smed_v6_12180_0_1	19.946	18.9014	20.9907	1.11054	0.151258	0.711034	0.991688
1980	dd_Smed_v6_12181_1_1	83.7194	89.4332	78.0055	0.872221	-0.197234	0.422885	0.953792
1981	dd_Smed_v6_12182_0_1	223.249	211.158	235.341	1.11453	0.15643	0.455448	0.960203
1982	dd_Smed_v6_12183_0_1	184.38	169.498	199.261	1.17559	0.233389	0.310897	0.925449
1983	dd_Smed_v6_12185_0_1	313.696	328.604	298.788	0.909265	-0.137227	0.518917	0.96745
1984	dd_Smed_v6_12187_0_1	126.313	145.023	107.604	0.741977	-0.430553	0.290707	0.917743
1985	dd_Smed_v6_12188_0_1	27.0528	31.1584	22.9473	0.736472	-0.441298	0.184536	0.87008
1986	dd_Smed_v6_1218_0_1	1950.87	1761.14	2140.6	1.21547	0.28151	0.130693	0.856634
1987	dd_Smed_v6_12190_0_1	108.017	93.6953	122.339	1.30571	0.384838	0.115031	0.849478
1988	dd_Smed_v6_12192_0_1	154.772	158.354	151.189	0.954752	-0.0668021	0.779408	1
1989	dd_Smed_v6_12193_0_1	253.452	264.561	242.343	0.916017	-0.126554	0.567528	0.975603
1990	dd_Smed_v6_12194_0_1	251.53	241.468	261.592	1.08334	0.115486	0.567654	0.975675
1991	dd_Smed_v6_12195_0_1	0.472061	0.66136	0.282761	0.427546	-1.22585	0.932718	1
1992	dd_Smed_v6_12196_0_1	9.21856	10.2544	8.18274	0.797976	-0.325583	0.592211	0.976959
1993	dd_Smed_v6_12197_0_1	164.497	200.258	128.737	0.642854	-0.637437	0.0201927	0.695695
1994	dd_Smed_v6_1219_1_1	3696.12	3712.66	3679.58	0.991089	-0.0129137	0.962531	1
1995	dd_Smed_v6_121_0_1	12924	12677.7	13170.2	1.03885	0.054981	0.75737	0.997743
1996	dd_Smed_v6_12201_0_1	255.075	264.182	245.968	0.931057	-0.103059	0.628074	0.979876
1997	dd_Smed_v6_12202_0_1	129.785	139.808	119.761	0.856607	-0.223295	0.525511	0.968961
1998	dd_Smed_v6_12203_0_1	136.583	133.316	139.849	1.049	0.0690112	0.77881	1
1999	dd_Smed_v6_12204_0_1	0.954014	0.333732	1.5743	4.71725	2.23795	0.291289	0.91846
[truncated: 15,216 more rows]
