# Supplementary material for: A small set of conserved genes, including sp5 and Hox, are activated by Wnt signaling in the posterior of planarians and acoels
Source: PLoS Genet. 2019 Oct 18;15(10):e1008401. doi: 10.1371/journal.pgen.1008401 (PMC6821139; doi:10.1371/journal.pgen.1008401)
Supplement: S4 Table — (XLSX) [file pgen.1008401.s004.xlsx]

## Sheet: day 3
id	baseMean	baseMeanA	baseMeanB	foldChange	log2FoldChange	pval	padj
98065737	13.2103	26.0632	0.357421	0.0137136	-6.18825	3.79e-09	2.41e-05
98053249	5.23307	9.88935	0.576795	0.0583249	-4.09974	0.000110544	0.157188
98008162	7.94643	14.9586	0.934216	0.0624533	-4.00108	3.43e-05	0.0671007
98018166	2657.12	4999.36	314.886	0.0629853	-3.98884	5.02e-22	2.24e-17
98052234	227.737	423.404	32.0695	0.0757422	-3.72276	1.92e-15	2.86e-11
98012200	2729.86	5021.46	438.262	0.0872778	-3.51824	1.95e-18	4.35e-14
98023259	72.711	132.173	13.2488	0.100238	-3.31849	1.11e-10	1.24e-06
98058295	327.061	573.879	80.2437	0.139827	-2.83829	6.48e-08	0.0002893
98064361	35.0584	58.7242	11.3926	0.194002	-2.36586	1.31e-06	0.00416589
98026319	25.9043	42.4099	9.3987	0.221616	-2.17387	0.000146669	0.192469
98023808	23.8797	38.8955	8.86379	0.227887	-2.13361	4.87e-05	0.0817325
98040021	883.354	1437.12	329.585	0.229337	-2.12446	4.34e-08	0.00021539
98016423	87.8156	142.312	33.3187	0.234124	-2.09466	9.61e-07	0.00357309
98021308	53.8659	86.3417	21.3901	0.247737	-2.01312	4.95e-05	0.0817325
98011665	522.351	807.272	237.431	0.294115	-1.76555	5.37e-06	0.0149683
98007090	312.799	479.289	146.31	0.305264	-1.71187	8.94e-06	0.0221497
98008165	265.204	405.715	124.692	0.307339	-1.7021	1.14e-05	0.0266975
98035279	139.053	209.26	68.8452	0.328993	-1.60387	0.000112738	0.157188
98014731	3141.66	4725.22	1558.09	0.329738	-1.60061	2.1e-05	0.0446965
98010037	1197.13	1782.73	611.526	0.343028	-1.5436	3.9e-05	0.0695763
98043529	1853.57	2759.08	948.053	0.343612	-1.54115	3.66e-05	0.0680769
98021693	1776.8	2614.8	938.796	0.359032	-1.47782	0.000121292	0.163991
98012065	170.769	71.4423	270.095	3.7806	1.91862	1.6e-06	0.0047503
98033487	66.1309	27.4518	104.81	3.81796	1.9328	1.87e-05	0.0417276
98012675	1051.28	433.106	1669.45	3.85459	1.94658	9.32e-07	0.00357309
98055894	38.7853	13.9276	63.643	4.56957	2.19206	8.3e-06	0.0217864
98067610	43.8035	14.8479	72.759	4.90028	2.29286	5.48e-05	0.0872571
98000150	90.1803	26.2321	154.128	5.87557	2.55473	4.9e-09	2.73e-05
98036298	46.348	9.41817	83.2779	8.84226	3.14442	2.29e-10	2.04e-06
98017293	34.1623	6.61268	61.712	9.33237	3.22224	2.51e-09	1.86e-05
98038746	34.7129	5.76978	63.6559	11.0326	3.46371	1.08e-06	0.00369427
98007293	8.36921	1.32535	15.4131	11.6294	3.53971	0.000105438	0.15681
98052872	47.7331	4.19532	91.2709	21.7554	4.4433	7.11e-05	0.109411
98046818	9.69274	0	19.3855	Inf	Inf	3.46e-05	0.0671007
98020892	25.1254	10.9	39.3507	3.61016	1.85206	0.000165154	0.210533
98028026	445.531	661.634	229.429	0.346761	-1.52799	0.000170703	0.211563
98041884	18.9426	7.26802	30.6173	4.2126	2.07471	0.000178677	0.21546
98017069	16.9195	5.8788	27.9602	4.75611	2.24978	0.000189244	0.222198
98040001	560.1	829.89	290.31	0.349817	-1.51533	0.000206025	0.235698
98020334	182.787	295.132	70.4411	0.238677	-2.06687	0.000220974	0.239153
98037580	326.089	477.048	175.13	0.367112	-1.44571	0.000225125	0.239153
98037649	34.8136	11.464	58.1633	5.07358	2.343	0.000219881	0.239153
98007120	24.6811	39.8451	9.51703	0.238851	-2.06582	0.000235799	0.244666
98009797	80.1919	40.4405	119.943	2.96592	1.56848	0.000272165	0.275981
98031549	12.078	21.1489	3.00719	0.142191	-2.81409	0.000285055	0.276485
98055083	1743.92	2507.88	979.961	0.390752	-1.35567	0.000283009	0.276485
98058684	18.1729	30.6318	5.71404	0.186539	-2.42245	0.000300445	0.285212
98034873	10.9195	2.35582	19.4831	8.2702	3.04792	0.000334315	0.310753
98046399	60.8922	30.6308	91.1537	2.97589	1.57332	0.000385352	0.350883
98025941	17.9253	7.2991	28.5515	3.91164	1.96777	0.000410823	0.366594
98053639	479.492	681.838	277.146	0.406469	-1.29878	0.00067847	0.58214
98035852	2760.36	292.599	5228.12	17.8678	4.15929	0.000665651	0.58214
98055936	148.548	59.1857	237.911	4.01973	2.0071	0.00076373	0.642931
98015891	211.153	307.91	114.396	0.371523	-1.42848	0.000803163	0.651541
98016031	851.87	1203.99	499.749	0.415077	-1.26855	0.000791094	0.651541
98055664	82.4043	120.346	44.4626	0.369457	-1.43652	0.000862535	0.68721
98038390	39.8775	11.5243	68.2308	5.92063	2.56575	0.000879667	0.688563
98036550	206.569	106.574	306.565	2.87654	1.52434	0.000952906	0.733031
98057900	3.82166	7.36235	0.280979	0.0381643	-4.71163	0.00102343	0.739272
98067723	5.18607	9.49952	0.872611	0.0918585	-3.44444	0.00102715	0.739272
98009605	46.9319	12.5062	81.3576	6.5054	2.70164	0.00100187	0.739272
98002750	7.83948	1.18525	14.4937	12.2283	3.61216	0.0010273	0.739272
98046032	788.739	1107.03	470.453	0.42497	-1.23457	0.00105894	0.749945
98018485	20.6342	35.1281	6.14021	0.174795	-2.51627	0.00136607	0.952346
98022136	5.05548	9.82998	0.280979	0.0285839	-5.12865	0.411015	1
98071800	11.1704	21.626	0.714842	0.0330548	-4.919	0.43205	1
98047617	4.24226	8.20354	0.280979	0.034251	-4.86771	0.00155533	1
98009662	11.67	22.4525	0.887448	0.0395256	-4.66107	0.461127	1
98063149	3.59652	6.91207	0.280979	0.0406505	-4.62058	0.440531	1
98053684	3.51016	6.7245	0.295816	0.0439908	-4.50665	0.201316	1
98058188	3.19827	6.11555	0.280979	0.045945	-4.44395	0.0991624	1
98023430	3.04154	5.78727	0.295816	0.051115	-4.29011	0.025635	1
98018349	2.87849	5.47599	0.280979	0.0513111	-4.28459	0.116886	1
98073965	2.77736	5.27374	0.280979	0.0532789	-4.23029	0.330687	1
98017573	5.38198	10.1723	0.591632	0.0581609	-4.10381	0.379523	1
98023560	2.52708	4.77319	0.280979	0.0588661	-4.08642	0.104467	1
98023282	4.97678	9.39159	0.561958	0.0598363	-4.06284	0.218629	1
98068544	2.45618	4.63138	0.280979	0.0606685	-4.04291	0.105655	1
98065270	5.31978	10.0012	0.6384	0.0638326	-3.96956	0.17216	1
98025516	2.41729	4.53876	0.295816	0.0651755	-3.93953	0.0216202	1
98016152	2.27032	4.25966	0.280979	0.0659628	-3.9222	0.413759	1
98022504	2.20761	4.13425	0.280979	0.0679638	-3.87909	0.256056	1
98051889	2.19942	4.11785	0.280979	0.0682343	-3.87336	0.04608	1
98016938	2.29977	4.30372	0.295816	0.068735	-3.86281	0.164583	1
98018358	2.28454	4.27326	0.295816	0.069225	-3.85256	0.0431704	1
98024953	2.26931	4.2428	0.295816	0.069722	-3.84224	0.183908	1
98036184	2.69751	5.0376	0.357421	0.0709506	-3.81704	0.0330292	1
98025422	4.22851	7.89507	0.561958	0.0711784	-3.81242	0.206272	1
98001084	2.11383	3.94668	0.280979	0.0711938	-3.8121	0.232839	1
98032522	2.10649	3.93199	0.280979	0.0714597	-3.80673	0.42976	1
98070243	2.10649	3.93199	0.280979	0.0714597	-3.80673	0.107192	1
98004006	2.21449	4.13316	0.295816	0.0715714	-3.80447	0.0920544	1
98077574	2.19949	4.10317	0.295816	0.0720945	-3.79397	0.339735	1
98041965	21.0064	39.1634	2.84942	0.0727571	-3.78077	0.478206	1
98007280	12.0433	22.4525	1.63422	0.0727858	-3.7802	0.429204	1
98016244	2.16787	4.03992	0.295816	0.0732233	-3.77155	0.0331685	1
98010319	2.15967	4.02352	0.295816	0.0735216	-3.76569	0.0406453	1
98068397	2.60373	4.85003	0.357421	0.0736946	-3.7623	0.0178533	1
98019739	2.03558	3.79019	0.280979	0.0741333	-3.75373	0.126337	1
98012326	2.02824	3.7755	0.280979	0.0744216	-3.74813	0.138412	1
98044469	2.02824	3.7755	0.280979	0.0744216	-3.74813	0.188529	1
98057985	2.02824	3.7755	0.280979	0.0744216	-3.74813	0.291137	1
98001850	2.09782	3.89982	0.295816	0.0758537	-3.72064	0.0304338	1
98058605	1.98842	3.69586	0.280979	0.0760254	-3.71737	0.0542311	1
98072774	2.05854	3.82127	0.295816	0.0774131	-3.69128	0.0344925	1
98002512	2.48706	4.6167	0.357421	0.0774192	-3.69116	0.0387268	1
98075310	1.99669	3.69757	0.295816	0.0800029	-3.6438	0.313923	1
98036383	1.88729	3.4936	0.280979	0.0804268	-3.63618	0.047134	1
98036798	1.88729	3.4936	0.280979	0.0804268	-3.63618	0.133429	1
98017286	20.8409	38.5686	3.1133	0.0807212	-3.63091	0.437868	1
98031121	1.87909	3.47721	0.280979	0.080806	-3.62939	0.339622	1
98027626	1.87175	3.46252	0.280979	0.0811487	-3.62329	0.0753406	1
98041708	1.96476	3.6337	0.295816	0.0814091	-3.61867	0.0838318	1
98018623	1.86441	3.44784	0.280979	0.0814943	-3.61716	0.138002	1
98061021	9.76625	18.0363	1.49617	0.0829534	-3.59155	0.353891	1
98001570	3.65791	6.75387	0.561958	0.0832054	-3.58718	0.00271526	1
98034533	25.9578	47.9274	3.98817	0.0832128	-3.58705	0.360382	1
98067987	1.82459	3.36819	0.280979	0.0834213	-3.58344	0.113962	1
98033134	1.91845	3.54108	0.295816	0.0835385	-3.58142	0.0785339	1
98035183	9.4676	17.471	1.46424	0.0838101	-3.57673	0.00364065	1
98038102	1.91025	3.52468	0.295816	0.083927	-3.57472	0.0803618	1
98020223	4.08736	7.53632	0.6384	0.0847098	-3.56133	0.176751	1
98038365	1.79436	3.30774	0.280979	0.0849459	-3.55731	0.312323	1
98050695	1.78616	3.29135	0.280979	0.085369	-3.55014	0.165935	1
98044319	1.77882	3.27666	0.280979	0.0857517	-3.54369	0.487562	1
98058404	1.77882	3.27666	0.280979	0.0857517	-3.54369	0.501133	1
98049992	1.77828	3.27557	0.280979	0.0857802	-3.54321	0.0661402	1
98011451	1.87183	3.44784	0.295816	0.0857976	-3.54292	0.321781	1
98072147	1.87183	3.44784	0.295816	0.0857976	-3.54292	0.158377	1
98025480	7.58144	13.9625	1.20036	0.08597	-3.54002	0.256327	1
98011096	359.865	662.527	57.2035	0.0863415	-3.5338	0.0140637	1
98029447	1.75485	3.22872	0.280979	0.087025	-3.52243	0.393758	1
98070417	1.7472	3.21341	0.280979	0.0874395	-3.51557	0.115462	1
98036874	3.49354	6.42511	0.561958	0.0874628	-3.51519	0.0282229	1
98055636	38.8571	71.4606	6.25365	0.0875119	-3.51438	0.450043	1
98059620	1.83286	3.3699	0.295816	0.0877818	-3.50993	0.157489	1
98009724	2.21421	4.071	0.357421	0.0877969	-3.50969	0.0462364	1
98018255	6.24683	11.483	1.01066	0.0880135	-3.50613	0.446354	1
98024470	1.72346	3.16594	0.280979	0.0887507	-3.4941	0.0976923	1
98058786	1.71612	3.15125	0.280979	0.0891643	-3.48739	0.0865766	1
98045447	1.80092	3.30603	0.295816	0.0894777	-3.48233	0.124132	1
98005330	3.96851	7.28379	0.653237	0.0896837	-3.47901	0.100067	1
98067123	2.16759	3.97776	0.357421	0.0898549	-3.47626	0.0337293	1
98001304	1.79358	3.29135	0.295816	0.0898769	-3.47591	0.141396	1
98002026	1.79358	3.29135	0.295816	0.0898769	-3.47591	0.0710736	1
98027542	1.79358	3.29135	0.295816	0.0898769	-3.47591	0.235859	1
98032804	1.79304	3.29026	0.295816	0.0899067	-3.47543	0.250035	1
98053825	1.70058	3.12017	0.280979	0.0900525	-3.47309	0.262609	1
98055230	3.40115	6.24034	0.561958	0.0900525	-3.47309	0.027191	1
98060382	1.70058	3.12017	0.280979	0.0900525	-3.47309	0.382115	1
98049615	2.16025	3.96307	0.357421	0.0901879	-3.47092	0.171853	1
98070628	2.15205	3.94668	0.357421	0.0905625	-3.46494	0.197043	1
98077395	1.77015	3.24449	0.295816	0.0911749	-3.45522	0.0776355	1
98020150	2.11308	3.86874	0.357421	0.0923869	-3.43617	0.0478269	1
98064515	1.65341	3.02584	0.280979	0.0928598	-3.4288	0.122246	1
98056073	9.67152	17.694	1.64906	0.0931989	-3.42354	0.421938	1
98054848	1.72353	3.15125	0.295816	0.0938726	-3.41315	0.169078	1
98074563	1.72353	3.15125	0.295816	0.0938726	-3.41315	0.12046	1
98063849	1.72268	3.14954	0.295816	0.0939235	-3.41237	0.37986	1
98014236	1.62967	2.97837	0.280979	0.09434	-3.40599	0.246809	1
98076807	1.62967	2.97837	0.280979	0.09434	-3.40599	0.284092	1
98020083	1.71534	3.13486	0.295816	0.0943635	-3.40563	0.146442	1
98040847	2.06646	3.7755	0.357421	0.0946685	-3.40097	0.301393	1
98032930	7.06301	12.896	1.23003	0.095381	-3.39015	0.00151918	1
98006909	2.05038	3.74333	0.357421	0.0954821	-3.38863	0.0629275	1
98058027	1.68371	3.07161	0.295816	0.0963066	-3.37622	0.244932	1
98025283	1.66903	3.04224	0.295816	0.0972364	-3.36236	0.107732	1
98026754	3.25293	5.92907	0.576795	0.0972826	-3.36167	0.543188	1
98027493	1.58336	2.88575	0.280979	0.097368	-3.36041	0.119606	1
98055105	3.30526	6.01889	0.591632	0.0982959	-3.34673	0.0646205	1
98075854	1.65263	3.00945	0.295816	0.0982959	-3.34673	0.195738	1
98011500	1.56782	2.85467	0.280979	0.098428	-3.34479	0.180589	1
98016953	1.56697	2.85296	0.280979	0.098487	-3.34392	0.468874	1
98003552	1.98822	3.61901	0.357421	0.0987621	-3.3399	0.255208	1
98046305	1.98822	3.61901	0.357421	0.0987621	-3.3399	0.111077	1
98075539	1.64529	2.99476	0.295816	0.0987779	-3.33967	0.130838	1
98051081	1.55962	2.83827	0.280979	0.0989966	-3.33648	0.179377	1
98058018	3.53964	6.44089	0.6384	0.0991168	-3.33473	0.120335	1
98056867	1.63795	2.98008	0.295816	0.0992647	-3.33258	0.273598	1
98025874	1.55228	2.82359	0.280979	0.0995115	-3.32899	0.222001	1
98030041	1.55228	2.82359	0.280979	0.0995115	-3.32899	0.0945978	1
98071324	1.55228	2.82359	0.280979	0.0995115	-3.32899	0.145059	1
98028170	1.62975	2.96368	0.295816	0.0998138	-3.32462	0.137369	1
98049984	1.62975	2.96368	0.295816	0.0998138	-3.32462	0.186656	1
98011660	3.50887	6.37935	0.6384	0.100073	-3.32088	0.00863107	1
98025897	72.511	131.81	13.2122	0.100237	-3.31852	0.435629	1
98013639	1.62241	2.949	0.295816	0.100311	-3.31745	0.398777	1
98030229	1.62241	2.949	0.295816	0.100311	-3.31745	0.436059	1
98003316	1.62186	2.94791	0.295816	0.100348	-3.31692	0.12844	1
98017038	1.53674	2.7925	0.280979	0.100619	-3.31302	0.158558	1
98028353	1.53674	2.7925	0.280979	0.100619	-3.31302	0.234906	1
98036202	1.53674	2.7925	0.280979	0.100619	-3.31302	0.175666	1
98042066	1.53674	2.7925	0.280979	0.100619	-3.31302	0.438004	1
98008235	1.60632	2.91683	0.295816	0.101417	-3.30163	0.107247	1
98013688	31.5793	57.3388	5.81979	0.101498	-3.30047	0.308292	1
98005790	1.52066	2.76034	0.280979	0.101792	-3.29631	0.202749	1
98031990	38.8548	70.5216	7.18787	0.101924	-3.29443	0.405568	1
98019359	3.19765	5.80366	0.591632	0.101941	-3.29419	0.308756	1
98001450	1.92551	3.4936	0.357421	0.102307	-3.28902	0.0767692	1
98050898	1.92551	3.4936	0.357421	0.102307	-3.28902	0.10415	1
98002142	1.59078	2.88575	0.295816	0.102509	-3.28617	0.14856	1
98022067	3.43148	6.22457	0.6384	0.102561	-3.28544	0.0443033	1
98036231	1.91817	3.47892	0.357421	0.102739	-3.28294	0.0917008	1
98033301	1.58258	2.86935	0.295816	0.103095	-3.27795	0.118803	1
98075644	1.58258	2.86935	0.295816	0.103095	-3.27795	0.136011	1
98075424	1.90997	3.46252	0.357421	0.103226	-3.27613	0.0880512	1
98003285	1.49777	2.71457	0.280979	0.103508	-3.27219	0.157182	1
98068421	1.57524	2.85467	0.295816	0.103626	-3.27055	0.124383	1
98005416	114.64	207.674	21.6057	0.104037	-3.26484	0.459192	1
98046652	1.48958	2.69817	0.280979	0.104137	-3.26345	0.246682	1
98021717	1.48223	2.68349	0.280979	0.104707	-3.25558	0.180111	1
98046888	1.5597	2.82359	0.295816	0.104766	-3.25476	0.0860989	1
98053387	1.55885	2.82188	0.295816	0.10483	-3.25388	0.539515	1
98076152	1.55885	2.82188	0.295816	0.10483	-3.25388	0.445634	1
98000730	1.5515	2.80719	0.295816	0.105378	-3.24635	0.178259	1
98024829	1.5515	2.80719	0.295816	0.105378	-3.24635	0.22854	1
98043876	1.5515	2.80719	0.295816	0.105378	-3.24635	0.206539	1
98055357	1.54416	2.7925	0.295816	0.105932	-3.23879	0.233566	1
98061981	1.54416	2.7925	0.295816	0.105932	-3.23879	0.389396	1
98066710	1.46669	2.65241	0.280979	0.105934	-3.23877	0.243181	1
98059752	1.46584	2.6507	0.280979	0.106002	-3.23784	0.190643	1
98065158	1.46584	2.6507	0.280979	0.106002	-3.23784	0.364241	1
98069745	2.99531	5.41383	0.576795	0.106541	-3.23052	0.204535	1
98013611	1.4585	2.63601	0.280979	0.106592	-3.22982	0.205126	1
98017528	1.4585	2.63601	0.280979	0.106592	-3.22982	0.193318	1
98021136	1.4585	2.63601	0.280979	0.106592	-3.22982	0.161939	1
98022976	1.4585	2.63601	0.280979	0.106592	-3.22982	0.297025	1
98043300	1.4585	2.63601	0.280979	0.106592	-3.22982	0.126354	1
98046285	1.4585	2.63601	0.280979	0.106592	-3.22982	0.224566	1
98069692	7.90013	14.2744	1.52585	0.106894	-3.22575	0.163849	1
98006392	1.45115	2.62133	0.280979	0.10719	-3.22176	0.229995	1
98011499	1.45115	2.62133	0.280979	0.10719	-3.22176	0.55986	1
98013506	1.45115	2.62133	0.280979	0.10719	-3.22176	0.256975	1
98032350	1.45115	2.62133	0.280979	0.10719	-3.22176	0.603109	1
98072536	1.45115	2.62133	0.280979	0.10719	-3.22176	0.468623	1
98073048	1.45115	2.62133	0.280979	0.10719	-3.22176	0.452809	1
98033430	3.6807	6.64656	0.714842	0.107551	-3.21691	0.102112	1
98023141	1.83992	3.32243	0.357421	0.107578	-3.21654	0.0700746	1
98057659	2.96369	5.35058	0.576795	0.1078	-3.21357	0.0301533	1
98067505	3.2682	5.89799	0.6384	0.10824	-3.20769	0.324833	1
98070631	3.2682	5.89799	0.6384	0.10824	-3.20769	0.567924	1
98055359	29.3573	52.9712	5.74335	0.108424	-3.20524	0.479269	1
98033653	4.38376	7.90975	0.857774	0.108445	-3.20496	0.241644	1
98078947	2.9473	5.31779	0.576795	0.108465	-3.2047	0.0377429	1
98013562	1.43507	2.58916	0.280979	0.108521	-3.20395	0.180541	1
98057605	1.82438	3.29135	0.357421	0.108594	-3.20298	0.0931259	1
98039828	1.8165	3.27557	0.357421	0.109117	-3.19605	0.127149	1
98002264	2.85514	5.14833	0.561958	0.109154	-3.19557	0.0395788	1
98053460	1.497	2.69817	0.295816	0.109636	-3.18921	0.218161	1
98037504	1.8083	3.25918	0.357421	0.109666	-3.18881	0.120308	1
98013404	1.41953	2.55808	0.280979	0.10984	-3.18653	0.132384	1
98014045	1.41953	2.55808	0.280979	0.10984	-3.18653	0.213314	1
98078354	3.2903	5.92736	0.653237	0.110207	-3.18171	0.200767	1
98057102	1.48965	2.68349	0.295816	0.110236	-3.18134	0.163972	1
98076967	1.4888	2.68178	0.295816	0.110306	-3.18042	0.246537	1
98045294	1.41133	2.54168	0.280979	0.110548	-3.17725	0.191854	1
98079122	1.41133	2.54168	0.280979	0.110548	-3.17725	0.266432	1
98015361	1.79276	3.2281	0.357421	0.110722	-3.17499	0.160803	1
98019934	1.48146	2.66709	0.295816	0.110913	-3.1725	0.174223	1
98043164	1.48146	2.66709	0.295816	0.110913	-3.1725	0.184507	1
98070382	1.48146	2.66709	0.295816	0.110913	-3.1725	0.220506	1
98026254	1.40399	2.527	0.280979	0.111191	-3.16889	0.252766	1
98027240	1.40399	2.527	0.280979	0.111191	-3.16889	0.134482	1
98036125	1.40399	2.527	0.280979	0.111191	-3.16889	0.197176	1
98059343	1.40399	2.527	0.280979	0.111191	-3.16889	0.235647	1
98034091	2.87725	5.1777	0.576795	0.1114	-3.16618	0.0540779	1
98015445	1.47326	2.6507	0.295816	0.111599	-3.1636	0.169833	1
98017498	1.3961	2.51122	0.280979	0.111889	-3.15986	0.615145	1
98033602	1.39579	2.5106	0.280979	0.111917	-3.1595	0.204916	1
98045002	1.46592	2.63601	0.295816	0.112221	-3.15559	0.171389	1
98046016	1.46592	2.63601	0.295816	0.112221	-3.15559	0.133287	1
98076557	1.46592	2.63601	0.295816	0.112221	-3.15559	0.234723	1
98027555	7.47266	13.4343	1.51101	0.112474	-3.15234	0.530591	1
98048626	1.38845	2.49592	0.280979	0.112575	-3.15104	0.215323	1
98074348	1.38845	2.49592	0.280979	0.112575	-3.15104	0.180634	1
98052980	1.38759	2.49421	0.280979	0.112653	-3.15005	0.605162	1
98058566	8.21038	14.7569	1.6639	0.112754	-3.14875	0.0507263	1
98026085	1.45857	2.62133	0.295816	0.11285	-3.14753	0.587606	1
98040697	1.45857	2.62133	0.295816	0.11285	-3.14753	0.34606	1
98052789	1.45857	2.62133	0.295816	0.11285	-3.14753	0.38481	1
98060480	1.45857	2.62133	0.295816	0.11285	-3.14753	0.218301	1
98078401	1.76199	3.16656	0.357421	0.112874	-3.14722	0.12938	1
98036459	1.76168	3.16594	0.357421	0.112896	-3.14694	0.159713	1
98062799	1.38025	2.47952	0.280979	0.11332	-3.14153	0.336174	1
98070215	1.38025	2.47952	0.280979	0.11332	-3.14153	0.209187	1
98077594	1.38025	2.47952	0.280979	0.11332	-3.14153	0.25635	1
98079599	2.83148	5.08617	0.576795	0.113405	-3.14045	0.229671	1
98000362	1.37291	2.46484	0.280979	0.113995	-3.13296	0.116697	1
98022428	1.37291	2.46484	0.280979	0.113995	-3.13296	0.432827	1
98049411	1.37291	2.46484	0.280979	0.113995	-3.13296	0.287619	1
98058743	1.37291	2.46484	0.280979	0.113995	-3.13296	0.154475	1
98003858	1.44249	2.58916	0.295816	0.114252	-3.12971	0.210935	1
98026276	38.3274	68.7274	7.92732	0.115344	-3.11598	0.239604	1
98040574	1.41875	2.54168	0.295816	0.116386	-3.10301	0.239285	1
98074778	1.41875	2.54168	0.295816	0.116386	-3.10301	0.188736	1
98031931	1.34128	2.40159	0.280979	0.116997	-3.09545	0.229438	1
98068401	4.09367	7.32956	0.857774	0.117029	-3.09506	0.0227021	1
98073195	1.41141	2.527	0.295816	0.117062	-3.09465	0.254334	1
98011169	2.74535	4.9139	0.576795	0.11738	-3.09074	0.0317503	1
98013745	1.69983	3.04224	0.357421	0.117486	-3.08943	0.179553	1
98017193	1.33394	2.3869	0.280979	0.117717	-3.08661	0.259053	1
98055461	1.33394	2.3869	0.280979	0.117717	-3.08661	0.213308	1
98048420	1.40352	2.51122	0.295816	0.117798	-3.08562	0.517794	1
98045576	2.80673	5.02183	0.591632	0.117812	-3.08544	0.0655137	1
98020548	1.40321	2.5106	0.295816	0.117827	-3.08526	0.292041	1
98014688	1.39587	2.49592	0.295816	0.11852	-3.0768	0.171746	1
98058694	1.38798	2.48014	0.295816	0.119274	-3.06765	0.27687	1
98019526	1.38767	2.47952	0.295816	0.119304	-3.06729	0.317074	1
98043385	1.38767	2.47952	0.295816	0.119304	-3.06729	0.21846	1
98021705	1.31755	2.35411	0.280979	0.119357	-3.06665	0.326536	1
98067836	1.31755	2.35411	0.280979	0.119357	-3.06665	0.636298	1
98011034	3.05556	5.45789	0.653237	0.119687	-3.06266	0.145856	1
98040905	2.69787	4.81895	0.576795	0.119693	-3.06259	0.0777951	1
98023364	1.66875	2.98008	0.357421	0.119937	-3.05965	0.287708	1
98008288	1.66789	2.97837	0.357421	0.120006	-3.05882	0.199228	1
98029659	1.66789	2.97837	0.357421	0.120006	-3.05882	0.364883	1
98014884	1.38033	2.46484	0.295816	0.120014	-3.05872	0.335958	1
98018601	1.38033	2.46484	0.295816	0.120014	-3.05872	0.135193	1
98023658	1.38033	2.46484	0.295816	0.120014	-3.05872	0.220128	1
98023846	1.38033	2.46484	0.295816	0.120014	-3.05872	0.431078	1
98027021	1.38033	2.46484	0.295816	0.120014	-3.05872	0.400419	1
98043896	1.38033	2.46484	0.295816	0.120014	-3.05872	0.168429	1
98063983	1.38033	2.46484	0.295816	0.120014	-3.05872	0.393167	1
98069666	1.38033	2.46484	0.295816	0.120014	-3.05872	0.254192	1
98075064	1.38033	2.46484	0.295816	0.120014	-3.05872	0.231785	1
98031075	1.3102	2.33943	0.280979	0.120106	-3.05762	0.324425	1
98030079	2.97075	5.30311	0.6384	0.120382	-3.05431	0.0261804	1
98008656	1.30201	2.32303	0.280979	0.120954	-3.04748	0.506516	1
98018419	1.30201	2.32303	0.280979	0.120954	-3.04748	0.472371	1
98032594	1.30201	2.32303	0.280979	0.120954	-3.04748	0.344226	1
98035767	1.30201	2.32303	0.280979	0.120954	-3.04748	0.398564	1
98046564	1.30201	2.32303	0.280979	0.120954	-3.04748	0.644451	1
98067952	1.30201	2.32303	0.280979	0.120954	-3.04748	0.394878	1
98050533	1.65321	2.949	0.357421	0.121201	-3.04453	0.455289	1
98058361	1.65321	2.949	0.357421	0.121201	-3.04453	0.175472	1
98009803	1.29466	2.30835	0.280979	0.121723	-3.03833	0.258376	1
98019596	1.29466	2.30835	0.280979	0.121723	-3.03833	0.250365	1
98022787	1.29466	2.30835	0.280979	0.121723	-3.03833	0.232016	1
98023358	1.29466	2.30835	0.280979	0.121723	-3.03833	0.326285	1
98028322	1.29466	2.30835	0.280979	0.121723	-3.03833	0.177666	1
98040996	1.29466	2.30835	0.280979	0.121723	-3.03833	0.300128	1
98049683	1.29466	2.30835	0.280979	0.121723	-3.03833	0.322847	1
98054754	1.29466	2.30835	0.280979	0.121723	-3.03833	0.325856	1
98056229	1.29466	2.30835	0.280979	0.121723	-3.03833	0.177292	1
98070645	1.29466	2.30835	0.280979	0.121723	-3.03833	0.309326	1
98031812	1.3569	2.41798	0.295816	0.12234	-3.03103	0.0972137	1
98063518	1.3569	2.41798	0.295816	0.12234	-3.03103	0.194839	1
98004770	1.28732	2.29366	0.280979	0.122502	-3.02912	0.412876	1
98017196	1.28732	2.29366	0.280979	0.122502	-3.02912	0.0741831	1
98043991	1.3487	2.40159	0.295816	0.123175	-3.02122	0.223158	1
98057373	1.3487	2.40159	0.295816	0.123175	-3.02122	0.257959	1
98058354	4.24261	7.55101	0.934216	0.123721	-3.01484	0.190944	1
98037557	1.34136	2.3869	0.295816	0.123933	-3.01237	0.154579	1
98048796	1.34136	2.3869	0.295816	0.123933	-3.01237	0.243097	1
98010643	21.028	37.3997	4.65625	0.1245	-3.00579	0.434727	1
98002238	1.33316	2.37051	0.295816	0.12479	-3.00242	0.260156	1
98003275	1.33316	2.37051	0.295816	0.12479	-3.00242	0.2585	1
98077314	2.59675	4.6167	0.576795	0.124937	-3.00073	0.0532604	1
98003932	1.60604	2.85467	0.357421	0.125206	-2.99762	0.129233	1
98073474	1.60604	2.85467	0.357421	0.125206	-2.99762	0.129957	1
98013080	1.32582	2.35582	0.295816	0.125568	-2.99346	0.211403	1
98046511	3.97715	7.06685	0.887448	0.125579	-2.99333	0.265653	1
98005594	1.32497	2.35411	0.295816	0.125659	-2.99241	0.294665	1
98044928	1.32497	2.35411	0.295816	0.125659	-2.99241	0.416586	1
98069883	1.32497	2.35411	0.295816	0.125659	-2.99241	0.501197	1
98018557	3.96981	7.05216	0.887448	0.125841	-2.99033	0.283786	1
98005684	5.55976	9.87466	1.24487	0.126067	-2.98774	0.0130964	1
98019606	1.31762	2.33943	0.295816	0.126448	-2.98338	0.278101	1
98020254	2.90813	5.16301	0.653237	0.126522	-2.98253	0.0294179	1
98006688	3.18101	5.64717	0.714842	0.126584	-2.98183	0.118721	1
98003572	6.37265	11.3107	1.43457	0.126833	-2.979	0.121458	1
98025697	1.2475	2.21402	0.280979	0.126909	-2.97813	0.392167	1
98029695	1.2475	2.21402	0.280979	0.126909	-2.97813	0.354099	1
98025440	4.98545	8.84699	1.12392	0.127039	-2.97665	0.572387	1
98079295	2.83066	5.02292	0.6384	0.127098	-2.97599	0.0234561	1
98009759	1.24016	2.19933	0.280979	0.127757	-2.96853	0.245964	1
98012585	1.24016	2.19933	0.280979	0.127757	-2.96853	0.306874	1
98070912	1.24016	2.19933	0.280979	0.127757	-2.96853	0.248059	1
98041931	1.57496	2.7925	0.357421	0.127993	-2.96586	0.115477	1
98056210	1.57496	2.7925	0.357421	0.127993	-2.96586	0.314132	1
98015839	1.30208	2.30835	0.295816	0.128151	-2.96409	0.315395	1
98030060	1.30208	2.30835	0.295816	0.128151	-2.96409	0.212253	1
98037757	1.30208	2.30835	0.295816	0.128151	-2.96409	0.266535	1
98062267	1.30208	2.30835	0.295816	0.128151	-2.96409	0.260803	1
98008487	1.23196	2.18294	0.280979	0.128716	-2.95774	0.329197	1
98022411	1.23196	2.18294	0.280979	0.128716	-2.95774	0.431677	1
98026736	1.23196	2.18294	0.280979	0.128716	-2.95774	0.333931	1
98046307	1.23196	2.18294	0.280979	0.128716	-2.95774	0.337302	1
98036727	2.79903	4.95967	0.6384	0.128718	-2.95771	0.0504973	1
98043108	1.29474	2.29366	0.295816	0.128971	-2.95488	0.380298	1
98074405	1.29474	2.29366	0.295816	0.128971	-2.95488	0.351155	1
98035223	4.016	7.11262	0.919379	0.12926	-2.95165	0.0310502	1
98079183	3.68205	6.52115	0.842937	0.129262	-2.95163	0.194598	1
98038868	3.74312	6.62846	0.857774	0.129408	-2.95	0.0275552	1
98068867	3.74312	6.62846	0.857774	0.129408	-2.95	0.0243706	1
98031488	2.78264	4.92688	0.6384	0.129575	-2.94814	0.0914438	1
98002174	1.22462	2.16825	0.280979	0.129588	-2.948	0.214074	1
98006079	1.22462	2.16825	0.280979	0.129588	-2.948	0.20768	1
98049202	1.22462	2.16825	0.280979	0.129588	-2.948	0.308514	1
98055662	1.22462	2.16825	0.280979	0.129588	-2.948	0.184371	1
98057564	1.22462	2.16825	0.280979	0.129588	-2.948	0.288654	1
98058888	1.22462	2.16825	0.280979	0.129588	-2.948	0.2614	1
98009141	1.21642	2.15186	0.280979	0.130575	-2.93705	0.368281	1
98028734	1.21642	2.15186	0.280979	0.130575	-2.93705	0.377522	1
98032838	1.21642	2.15186	0.280979	0.130575	-2.93705	0.336037	1
98052656	1.21642	2.15186	0.280979	0.130575	-2.93705	0.372782	1
98066653	1.21642	2.15186	0.280979	0.130575	-2.93705	0.322969	1
98075623	3.71289	6.56801	0.857774	0.130599	-2.93679	0.277428	1
98075598	1.27865	2.26149	0.295816	0.130806	-2.9345	0.187074	1
98004846	1.20908	2.13717	0.280979	0.131472	-2.92717	0.336476	1
98016607	1.20908	2.13717	0.280979	0.131472	-2.92717	0.292053	1
98016996	1.20908	2.13717	0.280979	0.131472	-2.92717	0.244402	1
98017143	1.20908	2.13717	0.280979	0.131472	-2.92717	0.308249	1
98027563	1.20908	2.13717	0.280979	0.131472	-2.92717	0.352389	1
98029524	1.20908	2.13717	0.280979	0.131472	-2.92717	0.231614	1
98029776	1.20908	2.13717	0.280979	0.131472	-2.92717	0.247209	1
98035447	1.20908	2.13717	0.280979	0.131472	-2.92717	0.216061	1
98048543	1.20908	2.13717	0.280979	0.131472	-2.92717	0.267375	1
98049671	1.20908	2.13717	0.280979	0.131472	-2.92717	0.274639	1
98066064	1.20908	2.13717	0.280979	0.131472	-2.92717	0.21239	1
98075298	1.20908	2.13717	0.280979	0.131472	-2.92717	0.205841	1
98071316	2.807	4.96076	0.653237	0.131681	-2.92488	0.059251	1
98020014	27.3561	48.3426	6.36954	0.131758	-2.92403	0.0383035	1
98056773	2.53326	4.47489	0.591632	0.132212	-2.91908	0.38056	1
98004623	1.20119	2.1214	0.280979	0.13245	-2.91648	0.360233	1
98039105	1.5278	2.69817	0.357421	0.132468	-2.91629	0.212561	1
98057408	1.5278	2.69817	0.357421	0.132468	-2.91629	0.121371	1
98000969	1.26311	2.23041	0.295816	0.132628	-2.91454	0.291014	1
98060152	1.26311	2.23041	0.295816	0.132628	-2.91454	0.228826	1
98059180	12.8528	22.6858	3.01977	0.133113	-2.90928	0.285585	1
98060893	1.52046	2.68349	0.357421	0.133193	-2.90841	0.119092	1
98036088	6.03811	10.6565	1.41973	0.133227	-2.90804	0.506768	1
98026716	2.44845	4.32011	0.576795	0.133514	-2.90494	0.0962873	1
98058025	1.24757	2.19933	0.295816	0.134503	-2.89429	0.18186	1
98064244	1.24757	2.19933	0.295816	0.134503	-2.89429	0.285659	1
98016098	1.50492	2.65241	0.357421	0.134753	-2.89161	0.32059	1
98024040	1.50406	2.6507	0.357421	0.13484	-2.89068	0.27786	1
98002363	3.72039	6.55332	0.887448	0.13542	-2.88449	0.518075	1
98060581	1.23938	2.18294	0.295816	0.135513	-2.8835	0.315864	1
98005276	2.99344	5.27203	0.714842	0.135592	-2.88266	0.160212	1
98010281	1.49672	2.63601	0.357421	0.135592	-2.88266	0.210487	1
98061933	1.49672	2.63601	0.357421	0.135592	-2.88266	0.149828	1
98007062	895.949	1577.25	214.653	0.136093	-2.87733	0.413053	1
98004385	1.48938	2.62133	0.357421	0.136351	-2.8746	0.390304	1
98029413	1.48938	2.62133	0.357421	0.136351	-2.8746	0.565931	1
98032261	1.48938	2.62133	0.357421	0.136351	-2.8746	0.276467	1
98019709	1.23203	2.16825	0.295816	0.136431	-2.87376	0.315839	1
98035138	1.23203	2.16825	0.295816	0.136431	-2.87376	0.19829	1
98043617	1.23203	2.16825	0.295816	0.136431	-2.87376	0.252292	1
98072695	1.23203	2.16825	0.295816	0.136431	-2.87376	0.283401	1
98013632	2.72056	4.78787	0.653237	0.136436	-2.87371	0.0468908	1
98007328	1.17011	2.05924	0.280979	0.136448	-2.87358	0.185673	1
98013140	1.17011	2.05924	0.280979	0.136448	-2.87358	0.272099	1
98015013	1.17011	2.05924	0.280979	0.136448	-2.87358	0.189327	1
98057946	1.17011	2.05924	0.280979	0.136448	-2.87358	0.187635	1
98077045	2.45673	4.32182	0.591632	0.136894	-2.86887	0.157425	1
98035742	1.22415	2.15248	0.295816	0.137431	-2.86323	0.404923	1
98015910	1.22384	2.15186	0.295816	0.13747	-2.86281	0.345866	1
98025851	1.22384	2.15186	0.295816	0.13747	-2.86281	0.325877	1
98036692	1.22384	2.15186	0.295816	0.13747	-2.86281	0.323226	1
98039075	1.22384	2.15186	0.295816	0.13747	-2.86281	0.349631	1
98045975	1.22384	2.15186	0.295816	0.13747	-2.86281	0.319048	1
98060632	1.22384	2.15186	0.295816	0.13747	-2.86281	0.376016	1
98065299	1.22384	2.15186	0.295816	0.13747	-2.86281	0.408787	1
98056888	2.38575	4.1947	0.576795	0.137506	-2.86244	0.346306	1
98048256	1.16191	2.04284	0.280979	0.137543	-2.86204	0.355418	1
98001404	1.21649	2.13717	0.295816	0.138415	-2.85293	0.304456	1
98021051	1.21649	2.13717	0.295816	0.138415	-2.85293	0.311575	1
98043901	1.21649	2.13717	0.295816	0.138415	-2.85293	0.248246	1
98054441	1.21649	2.13717	0.295816	0.138415	-2.85293	0.254302	1
98072876	1.21649	2.13717	0.295816	0.138415	-2.85293	0.225338	1
98074755	1.21649	2.13717	0.295816	0.138415	-2.85293	0.202685	1
98078606	1.21649	2.13717	0.295816	0.138415	-2.85293	0.211238	1
98068878	1.15457	2.02816	0.280979	0.138539	-2.85163	0.176536	1
98013636	1.46509	2.57276	0.357421	0.138925	-2.84762	0.204498	1
98040987	3.75923	6.59909	0.919379	0.139319	-2.84353	0.339054	1
98052889	1.20861	2.1214	0.295816	0.139444	-2.84224	0.352724	1
98079260	2.4169	4.24218	0.591632	0.139464	-2.84203	0.0827316	1
98031830	14.8744	26.1032	3.64559	0.139661	-2.84	0.380184	1
98008529	1.14637	2.01176	0.280979	0.139668	-2.83993	0.284872	1
98024869	1.14637	2.01176	0.280979	0.139668	-2.83993	0.409291	1
98074263	1.14637	2.01176	0.280979	0.139668	-2.83993	0.331958	1
98079302	1.14637	2.01176	0.280979	0.139668	-2.83993	0.415468	1
98069243	2.34733	4.11785	0.576795	0.140072	-2.83576	0.178638	1
98027875	2.33998	4.10317	0.576795	0.140573	-2.83061	0.208938	1
98060019	1.44955	2.54168	0.357421	0.140624	-2.83009	0.237867	1
98001149	1.13903	1.99708	0.280979	0.140695	-2.82936	0.326759	1
98003115	1.13903	1.99708	0.280979	0.140695	-2.82936	0.245448	1
98017853	1.13903	1.99708	0.280979	0.140695	-2.82936	0.228333	1
98026884	1.13903	1.99708	0.280979	0.140695	-2.82936	0.3545	1
98040820	1.13903	1.99708	0.280979	0.140695	-2.82936	0.519835	1
98065995	1.13903	1.99708	0.280979	0.140695	-2.82936	0.217009	1
98072853	1.13903	1.99708	0.280979	0.140695	-2.82936	0.187692	1
98028766	1.13817	1.99537	0.280979	0.140816	-2.82812	0.752498	1
98031740	1.13817	1.99537	0.280979	0.140816	-2.82812	0.460991	1
98042475	1.13817	1.99537	0.280979	0.140816	-2.82812	0.619318	1
98064820	1.13817	1.99537	0.280979	0.140816	-2.82812	0.443119	1
98056820	2.269	3.97605	0.561958	0.141336	-2.8228	0.237012	1
98059195	2.63528	4.61732	0.653237	0.141476	-2.82138	0.0557182	1
98008292	1.19307	2.09032	0.295816	0.141517	-2.82095	0.301319	1
98062082	1.19307	2.09032	0.295816	0.141517	-2.82095	0.255265	1
98005821	1.13083	1.98068	0.280979	0.14186	-2.81746	0.378187	1
98008386	1.13083	1.98068	0.280979	0.14186	-2.81746	0.317994	1
98008678	1.13083	1.98068	0.280979	0.14186	-2.81746	0.307643	1
98009687	1.13083	1.98068	0.280979	0.14186	-2.81746	0.296009	1
98019704	1.13083	1.98068	0.280979	0.14186	-2.81746	0.443376	1
98020757	1.13083	1.98068	0.280979	0.14186	-2.81746	0.38444	1
98020969	1.13083	1.98068	0.280979	0.14186	-2.81746	0.31284	1
98022764	1.13083	1.98068	0.280979	0.14186	-2.81746	0.321466	1
98033193	1.13083	1.98068	0.280979	0.14186	-2.81746	0.345242	1
98033463	1.13083	1.98068	0.280979	0.14186	-2.81746	0.306789	1
98038380	1.13083	1.98068	0.280979	0.14186	-2.81746	0.30695	1
98047830	1.13083	1.98068	0.280979	0.14186	-2.81746	0.365963	1
98049905	1.13083	1.98068	0.280979	0.14186	-2.81746	0.338685	1
98053861	1.13083	1.98068	0.280979	0.14186	-2.81746	0.297106	1
98054304	1.13083	1.98068	0.280979	0.14186	-2.81746	0.346631	1
98064628	1.13083	1.98068	0.280979	0.14186	-2.81746	0.383241	1
98069271	1.13083	1.98068	0.280979	0.14186	-2.81746	0.340378	1
98072545	1.13083	1.98068	0.280979	0.14186	-2.81746	0.301265	1
98076272	1.13083	1.98068	0.280979	0.14186	-2.81746	0.379468	1
98077226	1.13083	1.98068	0.280979	0.14186	-2.81746	0.443376	1
98077436	1.13083	1.98068	0.280979	0.14186	-2.81746	0.311364	1
98077516	1.13083	1.98068	0.280979	0.14186	-2.81746	0.346169	1
98078906	1.13083	1.98068	0.280979	0.14186	-2.81746	0.338566	1
98022570	2.87622	5.0376	0.714842	0.141901	-2.81704	0.0424861	1
98061658	1.43401	2.5106	0.357421	0.142365	-2.81234	0.273363	1
98059235	2.37028	4.14894	0.591632	0.142599	-2.80997	0.12539	1
98005709	1.12349	1.966	0.280979	0.142919	-2.80673	0.328981	1
98014012	1.12349	1.966	0.280979	0.142919	-2.80673	0.562219	1
98023165	1.12349	1.966	0.280979	0.142919	-2.80673	0.260642	1
98036166	1.12349	1.966	0.280979	0.142919	-2.80673	0.457024	1
98046908	1.12349	1.966	0.280979	0.142919	-2.80673	0.44884	1
98056530	1.12349	1.966	0.280979	0.142919	-2.80673	0.312191	1
98061337	2.24698	3.93199	0.561958	0.142919	-2.80673	0.248668	1
98040573	2.36209	4.13254	0.591632	0.143164	-2.80426	0.106316	1
98028422	1.42667	2.49592	0.357421	0.143202	-2.80387	0.175501	1
98066718	1.41847	2.47952	0.357421	0.144149	-2.79437	0.236622	1
98064766	1.16933	2.04284	0.295816	0.144806	-2.78781	0.375035	1
98027153	1.41113	2.46484	0.357421	0.145008	-2.7858	0.310586	1
98034464	1.41113	2.46484	0.357421	0.145008	-2.7858	0.224984	1
98035665	1.41113	2.46484	0.357421	0.145008	-2.7858	0.344561	1
98046978	1.41113	2.46484	0.357421	0.145008	-2.7858	0.152043	1
98065817	1.41113	2.46484	0.357421	0.145008	-2.7858	0.147824	1
98053442	1.1074	1.93383	0.280979	0.145297	-2.78292	0.266068	1
98051324	3.37788	5.89799	0.857774	0.145435	-2.78155	0.446734	1
98048827	2.81492	4.91499	0.714842	0.145441	-2.78149	0.628539	1
98012735	1.16199	2.02816	0.295816	0.145855	-2.7774	0.297323	1
98048685	1.16199	2.02816	0.295816	0.145855	-2.7774	0.362796	1
98062832	1.16199	2.02816	0.295816	0.145855	-2.7774	0.254341	1
98070210	1.16199	2.02816	0.295816	0.145855	-2.7774	0.334897	1
98024258	2.26119	3.94559	0.576795	0.146187	-2.77411	0.185668	1
98031592	1.15379	2.01176	0.295816	0.147043	-2.76569	0.373037	1
98046346	1.15379	2.01176	0.295816	0.147043	-2.76569	0.324152	1
98011287	2.19161	3.82127	0.561958	0.147061	-2.76552	0.105082	1
98017823	2.24565	3.91451	0.576795	0.147348	-2.7627	0.123314	1
98051546	1.09186	1.90275	0.280979	0.14767	-2.75955	0.362837	1
98056992	1.09186	1.90275	0.280979	0.14767	-2.75955	0.386456	1
98039900	141.827	247.06	36.5931	0.148114	-2.75522	0.194532	1
98000658	1.14645	1.99708	0.295816	0.148125	-2.75512	0.336929	1
98001200	1.14645	1.99708	0.295816	0.148125	-2.75512	0.517677	1
98043795	1.14645	1.99708	0.295816	0.148125	-2.75512	0.30899	1
98057333	1.14645	1.99708	0.295816	0.148125	-2.75512	0.206957	1
98020275	1.14559	1.99537	0.295816	0.148251	-2.75388	0.509023	1
98031354	1.14559	1.99537	0.295816	0.148251	-2.75388	0.785592	1
98031950	1.14559	1.99537	0.295816	0.148251	-2.75388	0.629293	1
98045292	1.14559	1.99537	0.295816	0.148251	-2.75388	0.488035	1
98058540	1.14559	1.99537	0.295816	0.148251	-2.75388	0.658585	1
98055416	2.17607	3.79019	0.561958	0.148267	-2.75373	0.294167	1
98076889	2.47191	4.30543	0.6384	0.148278	-2.75362	0.0839702	1
98038018	11.8534	20.643	3.06391	0.148424	-2.75221	0.507897	1
98048018	3.31432	5.77087	0.857774	0.148639	-2.75012	0.123114	1
98032859	2.2847	3.97776	0.591632	0.148735	-2.74918	0.0954021	1
98060031	1.37951	2.40159	0.357421	0.148827	-2.74829	0.217018	1
98062134	2.16873	3.7755	0.561958	0.148843	-2.74813	0.411596	1
98027673	2.16819	3.77441	0.561958	0.148886	-2.74772	0.100212	1
98058189	2.22191	3.86703	0.576795	0.149157	-2.7451	0.135798	1
98021055	219.229	381.485	56.9735	0.149346	-2.74327	0.30711	1
98007160	1.13825	1.98068	0.295816	0.149351	-2.74322	0.335846	1
98028560	1.13825	1.98068	0.295816	0.149351	-2.74322	0.328044	1
98042757	1.13825	1.98068	0.295816	0.149351	-2.74322	0.344058	1
98045137	1.13825	1.98068	0.295816	0.149351	-2.74322	0.316227	1
98048848	1.13825	1.98068	0.295816	0.149351	-2.74322	0.387621	1
98000436	2.21457	3.85235	0.576795	0.149726	-2.73961	0.159805	1
98065649	1.37216	2.3869	0.357421	0.149743	-2.73944	0.178403	1
98017198	1.07632	1.87167	0.280979	0.150122	-2.73579	0.323457	1
98023649	1.07632	1.87167	0.280979	0.150122	-2.73579	0.269441	1
98024659	1.07632	1.87167	0.280979	0.150122	-2.73579	0.425395	1
98043085	1.07632	1.87167	0.280979	0.150122	-2.73579	0.357913	1
98048875	1.07632	1.87167	0.280979	0.150122	-2.73579	0.381189	1
98055041	1.07632	1.87167	0.280979	0.150122	-2.73579	0.384903	1
98056067	1.07632	1.87167	0.280979	0.150122	-2.73579	0.320726	1
98070368	1.07632	1.87167	0.280979	0.150122	-2.73579	0.400418	1
98071273	3.2827	5.70762	0.857774	0.150286	-2.73422	0.0514935	1
98079132	2.20637	3.83595	0.576795	0.150366	-2.73345	0.242129	1
98000503	1.13091	1.966	0.295816	0.150466	-2.73249	0.259919	1
98000800	1.13091	1.966	0.295816	0.150466	-2.73249	0.624145	1
98001000	1.13091	1.966	0.295816	0.150466	-2.73249	0.34111	1
98007892	1.13091	1.966	0.295816	0.150466	-2.73249	0.317385	1
98017088	1.13091	1.966	0.295816	0.150466	-2.73249	0.502145	1
98018076	1.13091	1.966	0.295816	0.150466	-2.73249	0.519173	1
98022686	1.13091	1.966	0.295816	0.150466	-2.73249	0.479286	1
98030468	1.13091	1.966	0.295816	0.150466	-2.73249	0.575554	1
98031623	1.13091	1.966	0.295816	0.150466	-2.73249	0.26834	1
98034711	1.13091	1.966	0.295816	0.150466	-2.73249	0.488416	1
98035834	1.13091	1.966	0.295816	0.150466	-2.73249	0.476357	1
98039401	1.13091	1.966	0.295816	0.150466	-2.73249	0.184286	1
98040865	1.13091	1.966	0.295816	0.150466	-2.73249	0.343542	1
98045583	1.13091	1.966	0.295816	0.150466	-2.73249	0.507163	1
98045873	1.13091	1.966	0.295816	0.150466	-2.73249	0.491603	1
98046133	1.13091	1.966	0.295816	0.150466	-2.73249	0.309154	1
98055667	1.13091	1.966	0.295816	0.150466	-2.73249	0.469649	1
98061925	1.13091	1.966	0.295816	0.150466	-2.73249	0.3959	1
98065547	1.13091	1.966	0.295816	0.150466	-2.73249	0.333	1
98076052	1.13091	1.966	0.295816	0.150466	-2.73249	0.341841	1
98006809	1.36396	2.37051	0.357421	0.150778	-2.7295	0.201452	1
98024849	2.14445	3.72694	0.561958	0.150783	-2.72946	0.190796	1
98015635	4.62518	8.03516	1.2152	0.151235	-2.72514	0.474697	1
98033489	1.06813	1.85527	0.280979	0.151449	-2.7231	0.52619	1
98043328	1.06813	1.85527	0.280979	0.151449	-2.7231	0.54049	1
98068196	1.06813	1.85527	0.280979	0.151449	-2.7231	0.585188	1
98077911	2.19114	3.80549	0.576795	0.151569	-2.72195	0.170332	1
98007278	1.35662	2.35582	0.357421	0.151718	-2.72053	0.168581	1
98020884	2.47933	4.30543	0.653237	0.151724	-2.72048	0.0389653	1
98054303	2.18349	3.79019	0.576795	0.152181	-2.71614	0.112199	1
98003647	422.559	733.475	111.643	0.152211	-2.71585	0.319692	1
98048914	7.17471	12.4513	1.89811	0.152442	-2.71366	0.536057	1
98009594	1.06078	1.84059	0.280979	0.152657	-2.71163	0.424095	1
98013760	1.06078	1.84059	0.280979	0.152657	-2.71163	0.384682	1
98015559	1.06078	1.84059	0.280979	0.152657	-2.71163	0.425126	1
98045226	1.06078	1.84059	0.280979	0.152657	-2.71163	0.381843	1
98055101	1.06078	1.84059	0.280979	0.152657	-2.71163	0.452245	1
98070027	1.06078	1.84059	0.280979	0.152657	-2.71163	0.385344	1
98025265	2.40952	4.18063	0.6384	0.152704	-2.71119	0.232324	1
98039590	63.0085	109.321	16.6957	0.152721	-2.71103	0.0100189	1
98029494	3.46265	6.00592	0.919379	0.153079	-2.70765	0.0387456	1
98041932	3.22819	5.59861	0.857774	0.153212	-2.7064	0.060401	1
98066041	2.11422	3.66649	0.561958	0.153269	-2.70586	0.328282	1
98001669	3.28277	5.69294	0.872611	0.15328	-2.70576	0.0774787	1
98021205	2.11368	3.6654	0.561958	0.153314	-2.70544	0.106792	1
98001106	1.05259	1.82419	0.280979	0.154029	-2.69872	0.440299	1
98013613	1.05259	1.82419	0.280979	0.154029	-2.69872	0.601318	1
98028216	1.05259	1.82419	0.280979	0.154029	-2.69872	0.42305	1
98036924	1.05259	1.82419	0.280979	0.154029	-2.69872	0.444496	1
98038525	1.05259	1.82419	0.280979	0.154029	-2.69872	0.441107	1
98051297	1.05259	1.82419	0.280979	0.154029	-2.69872	0.602106	1
98053467	1.05259	1.82419	0.280979	0.154029	-2.69872	0.402288	1
98061482	1.05259	1.82419	0.280979	0.154029	-2.69872	0.470489	1
98064332	1.05259	1.82419	0.280979	0.154029	-2.69872	0.51008	1
98057612	2.09814	3.63432	0.561958	0.154626	-2.69315	0.157668	1
98041744	1.33288	2.30835	0.357421	0.154838	-2.69116	0.287353	1
98042963	1.33288	2.30835	0.357421	0.154838	-2.69116	0.27939	1
98044404	1.33288	2.30835	0.357421	0.154838	-2.69116	0.233509	1
98069036	1.33288	2.30835	0.357421	0.154838	-2.69116	0.222836	1
98003176	1.04524	1.80951	0.280979	0.155279	-2.68706	0.326854	1
98007173	1.04524	1.80951	0.280979	0.155279	-2.68706	0.264642	1
98009689	1.04524	1.80951	0.280979	0.155279	-2.68706	0.345974	1
98010478	1.04524	1.80951	0.280979	0.155279	-2.68706	0.373029	1
98011835	1.04524	1.80951	0.280979	0.155279	-2.68706	0.356788	1
98011987	1.04524	1.80951	0.280979	0.155279	-2.68706	0.454307	1
98013582	1.04524	1.80951	0.280979	0.155279	-2.68706	0.272144	1
98015858	1.04524	1.80951	0.280979	0.155279	-2.68706	0.343428	1
98025220	1.04524	1.80951	0.280979	0.155279	-2.68706	0.341529	1
98030114	1.04524	1.80951	0.280979	0.155279	-2.68706	0.350078	1
98030425	1.04524	1.80951	0.280979	0.155279	-2.68706	0.317165	1
98035763	1.04524	1.80951	0.280979	0.155279	-2.68706	0.345888	1
98040673	1.04524	1.80951	0.280979	0.155279	-2.68706	0.367942	1
98046596	1.04524	1.80951	0.280979	0.155279	-2.68706	0.428611	1
98048124	1.04524	1.80951	0.280979	0.155279	-2.68706	0.282254	1
98048197	2.09049	3.61901	0.561958	0.155279	-2.68706	0.210099	1
98053383	1.04524	1.80951	0.280979	0.155279	-2.68706	0.323252	1
98054473	1.04524	1.80951	0.280979	0.155279	-2.68706	0.356178	1
98056984	1.04524	1.80951	0.280979	0.155279	-2.68706	0.302418	1
98060993	1.04524	1.80951	0.280979	0.155279	-2.68706	0.303971	1
98071360	1.04524	1.80951	0.280979	0.155279	-2.68706	0.341627	1
98071508	1.04524	1.80951	0.280979	0.155279	-2.68706	0.372285	1
98074963	1.04524	1.80951	0.280979	0.155279	-2.68706	0.401977	1
98077973	1.04524	1.80951	0.280979	0.155279	-2.68706	0.356919	1
98012132	2.19911	3.80658	0.591632	0.155423	-2.68572	0.187718	1
98071946	2.19911	3.80658	0.591632	0.155423	-2.68572	0.321331	1
98039580	3.2435	5.61438	0.872611	0.155424	-2.68572	0.084027	1
98031730	1.09928	1.90275	0.295816	0.155468	-2.68531	0.359957	1
98074212	1.09928	1.90275	0.295816	0.155468	-2.68531	0.28477	1
98038665	1.32554	2.29366	0.357421	0.15583	-2.68196	0.372779	1
98050711	1.32554	2.29366	0.357421	0.15583	-2.68196	0.511428	1
98053598	1.32554	2.29366	0.357421	0.15583	-2.68196	0.41492	1
98054912	1.32554	2.29366	0.357421	0.15583	-2.68196	0.604649	1
98065811	1.32554	2.29366	0.357421	0.15583	-2.68196	0.612532	1
98042252	2.08314	3.60433	0.561958	0.155912	-2.6812	0.494666	1
98068016	4.31255	7.45668	1.16843	0.156695	-2.67396	0.114078	1
98041164	2.39374	4.13425	0.653237	0.158006	-2.66195	0.0521503	1
98021166	2.05886	3.55576	0.561958	0.158042	-2.66162	0.115298	1
98027242	1.30946	2.26149	0.357421	0.158047	-2.66158	0.324493	1
98030344	1.30946	2.26149	0.357421	0.158047	-2.66158	0.195001	1
98004233	1.08374	1.87167	0.295816	0.15805	-2.66155	0.318906	1
98009344	1.08374	1.87167	0.295816	0.15805	-2.66155	0.250165	1
98021815	1.08374	1.87167	0.295816	0.15805	-2.66155	0.422819	1
98030191	1.08374	1.87167	0.295816	0.15805	-2.66155	0.422819	1
98036108	1.08374	1.87167	0.295816	0.15805	-2.66155	0.258319	1
98037645	1.08374	1.87167	0.295816	0.15805	-2.66155	0.356535	1
98057292	2.16748	3.74333	0.591632	0.15805	-2.66155	0.108036	1
98059029	1.08374	1.87167	0.295816	0.15805	-2.66155	0.361473	1
98021961	2.10525	3.6337	0.576795	0.158735	-2.65531	0.160557	1
98047481	2.10525	3.6337	0.576795	0.158735	-2.65531	0.158035	1
98054782	3.34513	5.77087	0.919379	0.159314	-2.65006	0.15119	1
98007077	1.02182	1.76265	0.280979	0.159407	-2.64921	0.332154	1
98058467	1.02182	1.76265	0.280979	0.159407	-2.64921	0.291906	1
98027042	3.43821	5.92736	0.949053	0.160114	-2.64283	0.135036	1
98054840	5.24847	9.04753	1.44941	0.160199	-2.64206	0.23757	1
98075958	3.15876	5.44491	0.872611	0.160262	-2.6415	0.218879	1
98019257	4.39864	7.58209	1.2152	0.160272	-2.64141	0.159596	1
98072301	4.39044	7.56569	1.2152	0.160619	-2.63828	0.242069	1
98002664	1.0682	1.84059	0.295816	0.160718	-2.63739	0.340541	1
98023803	1.0682	1.84059	0.295816	0.160718	-2.63739	0.283128	1
98025460	1.0682	1.84059	0.295816	0.160718	-2.63739	0.319434	1
98043737	1.0682	1.84059	0.295816	0.160718	-2.63739	0.326472	1
98071391	1.0682	1.84059	0.295816	0.160718	-2.63739	0.427942	1
98029615	3.15057	5.42852	0.872611	0.160746	-2.63715	0.21174	1
98025386	2.02778	3.4936	0.561958	0.160854	-2.63618	0.163774	1
98002502	2.30019	3.96198	0.6384	0.161131	-2.63369	0.126835	1
98044580	2.01958	3.47721	0.561958	0.161612	-2.62939	0.2477	1
98040829	2.34658	4.03992	0.653237	0.161696	-2.62865	0.113527	1
98044879	2.29254	3.94668	0.6384	0.161756	-2.62811	0.176997	1
98000110	4.30563	7.41091	1.20036	0.161972	-2.62619	0.22024	1
98011163	1.06	1.82419	0.295816	0.162163	-2.62448	0.651375	1
98015646	1.06	1.82419	0.295816	0.162163	-2.62448	0.472883	1
98026324	1.06	1.82419	0.295816	0.162163	-2.62448	0.469455	1
98060962	1.06	1.82419	0.295816	0.162163	-2.62448	0.464191	1
98062149	1.06	1.82419	0.295816	0.162163	-2.62448	0.541813	1
98076260	1.06	1.82419	0.295816	0.162163	-2.62448	0.555145	1
98036381	1.00628	1.73157	0.280979	0.162268	-2.62355	0.392184	1
98056208	1.00628	1.73157	0.280979	0.162268	-2.62355	0.435945	1
98011246	2.01224	3.46252	0.561958	0.162297	-2.62329	0.27165	1
98046283	23.7626	40.8846	6.64056	0.162422	-2.62218	0.00692884	1
98003169	1.27838	2.19933	0.357421	0.162513	-2.62137	0.231711	1
98078821	2.0049	3.44784	0.561958	0.162989	-2.61716	0.32284	1
98002849	1.05266	1.80951	0.295816	0.163479	-2.61282	0.386324	1
98008267	1.05266	1.80951	0.295816	0.163479	-2.61282	0.356561	1
98009869	1.05266	1.80951	0.295816	0.163479	-2.61282	0.371935	1
98019142	1.05266	1.80951	0.295816	0.163479	-2.61282	0.408245	1
98022694	1.05266	1.80951	0.295816	0.163479	-2.61282	0.30963	1
98028524	1.05266	1.80951	0.295816	0.163479	-2.61282	0.371023	1
98043746	1.05266	1.80951	0.295816	0.163479	-2.61282	0.370562	1
98046217	1.05266	1.80951	0.295816	0.163479	-2.61282	0.402266	1
98047680	1.05266	1.80951	0.295816	0.163479	-2.61282	0.331681	1
98047994	1.05266	1.80951	0.295816	0.163479	-2.61282	0.402266	1
98052579	1.05266	1.80951	0.295816	0.163479	-2.61282	0.365973	1
98056159	1.05266	1.80951	0.295816	0.163479	-2.61282	0.40261	1
98056885	1.05266	1.80951	0.295816	0.163479	-2.61282	0.350132	1
98065222	1.05266	1.80951	0.295816	0.163479	-2.61282	0.39217	1
98064129	2.54121	4.36759	0.714842	0.16367	-2.61114	0.0665474	1
98039926	0.998078	1.71518	0.280979	0.163819	-2.60982	0.445773	1
98047757	0.998078	1.71518	0.280979	0.163819	-2.60982	0.418246	1
98051749	0.998078	1.71518	0.280979	0.163819	-2.60982	0.463272	1
98064789	0.998078	1.71518	0.280979	0.163819	-2.60982	0.538694	1
98061188	6.09169	10.4678	1.71555	0.163888	-2.60922	0.147833	1
98046385	2.0434	3.51	0.576795	0.164329	-2.60534	0.0977777	1
98077538	2.0434	3.51	0.576795	0.164329	-2.60534	0.0930632	1
98039843	2.30816	3.96307	0.653237	0.164831	-2.60094	0.364298	1
98005142	1.26284	2.16825	0.357421	0.164843	-2.60084	0.291031	1
98008653	1.26284	2.16825	0.357421	0.164843	-2.60084	0.273821	1
98022373	1.04477	1.79373	0.295816	0.164917	-2.60019	0.454381	1
98056068	1.04477	1.79373	0.295816	0.164917	-2.60019	0.717461	1
98069626	6.37855	10.9503	1.80683	0.165003	-2.59944	0.0355312	1
98008681	0.990735	1.70049	0.280979	0.165234	-2.59742	0.318065	1
98010711	0.990735	1.70049	0.280979	0.165234	-2.59742	0.366845	1
98023550	0.990735	1.70049	0.280979	0.165234	-2.59742	0.437704	1
98024042	0.990735	1.70049	0.280979	0.165234	-2.59742	0.320326	1
98049619	0.990735	1.70049	0.280979	0.165234	-2.59742	0.257075	1
98054369	0.990735	1.70049	0.280979	0.165234	-2.59742	0.307496	1
98070016	0.990735	1.70049	0.280979	0.165234	-2.59742	0.342298	1
98074678	0.990735	1.70049	0.280979	0.165234	-2.59742	0.372765	1
98038894	2.51833	4.32182	0.714842	0.165403	-2.59594	0.105081	1
98046654	13.4748	23.1214	3.82814	0.165567	-2.59451	0.204623	1
98041550	2.24452	3.85064	0.6384	0.165791	-2.59256	0.542359	1
98021460	1.25495	2.15248	0.357421	0.166051	-2.5903	0.341084	1
98012020	1.25464	2.15186	0.357421	0.166099	-2.58989	0.335495	1
98020057	1.25464	2.15186	0.357421	0.166099	-2.58989	0.351471	1
98027045	1.25464	2.15186	0.357421	0.166099	-2.58989	0.282484	1
98028390	1.25464	2.15186	0.357421	0.166099	-2.58989	0.376038	1
98031164	1.25464	2.15186	0.357421	0.166099	-2.58989	0.373802	1
98050875	1.25464	2.15186	0.357421	0.166099	-2.58989	0.404344	1
98012947	2.29262	3.93199	0.653237	0.166134	-2.58958	0.455432	1
98027679	3.26727	5.60031	0.934216	0.166815	-2.58368	0.0424289	1
98009979	0.982538	1.6841	0.280979	0.166843	-2.58344	0.519436	1
98016912	0.982538	1.6841	0.280979	0.166843	-2.58344	0.503159	1
98028564	0.982538	1.6841	0.280979	0.166843	-2.58344	0.438789	1
98038980	0.982538	1.6841	0.280979	0.166843	-2.58344	0.39239	1
98059014	0.982538	1.6841	0.280979	0.166843	-2.58344	0.472959	1
98061432	0.982538	1.6841	0.280979	0.166843	-2.58344	0.403562	1
98065121	0.982538	1.6841	0.280979	0.166843	-2.58344	0.565981	1
98076995	0.982538	1.6841	0.280979	0.166843	-2.58344	0.565981	1
98049045	1.2473	2.13717	0.357421	0.16724	-2.58001	0.260647	1
98069188	1.2473	2.13717	0.357421	0.16724	-2.58001	0.359082	1
98056485	2.01232	3.44784	0.576795	0.167292	-2.57956	0.287582	1
98007265	1.02923	1.76265	0.295816	0.167825	-2.57497	0.550478	1
98034751	1.02923	1.76265	0.295816	0.167825	-2.57497	0.371214	1
98034903	1.02923	1.76265	0.295816	0.167825	-2.57497	0.336443	1
98064019	1.02923	1.76265	0.295816	0.167825	-2.57497	0.427021	1
98067819	1.02923	1.76265	0.295816	0.167825	-2.57497	0.319578	1
98009324	0.975195	1.66941	0.280979	0.16831	-2.5708	0.292657	1
98015536	0.975195	1.66941	0.280979	0.16831	-2.5708	0.364364	1
98019561	0.975195	1.66941	0.280979	0.16831	-2.5708	0.262136	1
98021323	0.975195	1.66941	0.280979	0.16831	-2.5708	0.342337	1
98030562	0.975195	1.66941	0.280979	0.16831	-2.5708	0.414554	1
98033184	0.975195	1.66941	0.280979	0.16831	-2.5708	0.310423	1
98049192	0.975195	1.66941	0.280979	0.16831	-2.5708	0.260968	1
98057643	0.975195	1.66941	0.280979	0.16831	-2.5708	0.357645	1
98053677	5.07597	8.6877	1.46424	0.168542	-2.56882	0.0201527	1
98058842	2.05081	3.51	0.591632	0.168556	-2.5687	0.106858	1
98025372	3.18215	5.44491	0.919379	0.168851	-2.56618	0.305185	1
98059007	2.20695	3.7755	0.6384	0.16909	-2.56414	0.191759	1
98046464	3.98396	6.81432	1.15359	0.169289	-2.56244	0.100664	1
98077223	2.04262	3.4936	0.591632	0.169347	-2.56194	0.135997	1
98019032	4.1404	7.08045	1.20036	0.169531	-2.56037	0.0361111	1
98034861	2.46297	4.2111	0.714842	0.169752	-2.5585	0.0839173	1
98001688	0.966998	1.65302	0.280979	0.16998	-2.55657	0.477338	1
98004167	0.966998	1.65302	0.280979	0.16998	-2.55657	0.47169	1
98006976	0.966998	1.65302	0.280979	0.16998	-2.55657	0.519148	1
98011688	0.966998	1.65302	0.280979	0.16998	-2.55657	0.567804	1
98015300	0.966998	1.65302	0.280979	0.16998	-2.55657	0.503245	1
98029244	0.966998	1.65302	0.280979	0.16998	-2.55657	0.477947	1
98030022	0.966998	1.65302	0.280979	0.16998	-2.55657	0.519148	1
98039439	0.966998	1.65302	0.280979	0.16998	-2.55657	0.375486	1
98041431	0.966998	1.65302	0.280979	0.16998	-2.55657	0.508488	1
98049707	0.966998	1.65302	0.280979	0.16998	-2.55657	0.480642	1
98055263	0.966998	1.65302	0.280979	0.16998	-2.55657	0.450114	1
98056237	0.966998	1.65302	0.280979	0.16998	-2.55657	0.519148	1
98064690	0.966998	1.65302	0.280979	0.16998	-2.55657	0.454618	1
98069931	1.934	3.30603	0.561958	0.16998	-2.55657	0.158844	1
98071170	0.966998	1.65302	0.280979	0.16998	-2.55657	0.444472	1
98074133	0.966998	1.65302	0.280979	0.16998	-2.55657	0.417314	1
98052017	3.00204	5.13146	0.872611	0.170051	-2.55596	0.159431	1
98011367	6.04899	10.3379	1.76006	0.170253	-2.55425	0.115129	1
98072708	1.92665	3.29135	0.561958	0.170738	-2.55014	0.236388	1
98003150	1.01369	1.73157	0.295816	0.170837	-2.54931	0.263985	1
98027672	1.01369	1.73157	0.295816	0.170837	-2.54931	0.379723	1
98000272	0.959655	1.63833	0.280979	0.171503	-2.54369	0.466388	1
98000310	0.959655	1.63833	0.280979	0.171503	-2.54369	0.335076	1
98002237	0.959655	1.63833	0.280979	0.171503	-2.54369	0.375303	1
98003730	0.959655	1.63833	0.280979	0.171503	-2.54369	0.52003	1
98007501	0.959655	1.63833	0.280979	0.171503	-2.54369	0.644361	1
98009726	0.959655	1.63833	0.280979	0.171503	-2.54369	0.288494	1
98014139	0.959655	1.63833	0.280979	0.171503	-2.54369	0.586045	1
98017318	0.959655	1.63833	0.280979	0.171503	-2.54369	0.524134	1
98018501	0.959655	1.63833	0.280979	0.171503	-2.54369	0.590384	1
98023862	0.959655	1.63833	0.280979	0.171503	-2.54369	0.404568	1
98025065	0.959655	1.63833	0.280979	0.171503	-2.54369	0.545574	1
98025738	0.959655	1.63833	0.280979	0.171503	-2.54369	0.472245	1
98025919	0.959655	1.63833	0.280979	0.171503	-2.54369	0.425773	1
98028143	0.959655	1.63833	0.280979	0.171503	-2.54369	0.575293	1
98029853	0.959655	1.63833	0.280979	0.171503	-2.54369	0.52757	1
98032683	0.959655	1.63833	0.280979	0.171503	-2.54369	0.649347	1
98034131	0.959655	1.63833	0.280979	0.171503	-2.54369	0.540808	1
98035745	0.959655	1.63833	0.280979	0.171503	-2.54369	0.451972	1
98049244	0.959655	1.63833	0.280979	0.171503	-2.54369	0.281904	1
98055874	0.959655	1.63833	0.280979	0.171503	-2.54369	0.337322	1
98057112	0.959655	1.63833	0.280979	0.171503	-2.54369	0.617502	1
98057739	0.959655	1.63833	0.280979	0.171503	-2.54369	0.495808	1
98057757	0.959655	1.63833	0.280979	0.171503	-2.54369	0.645595	1
98060698	0.959655	1.63833	0.280979	0.171503	-2.54369	0.313588	1
98063189	0.959655	1.63833	0.280979	0.171503	-2.54369	0.552659	1
98068711	0.959655	1.63833	0.280979	0.171503	-2.54369	0.630517	1
98070177	0.959655	1.63833	0.280979	0.171503	-2.54369	0.255918	1
98070366	0.959655	1.63833	0.280979	0.171503	-2.54369	0.401848	1
98070726	0.959655	1.63833	0.280979	0.171503	-2.54369	0.53561	1
98072529	1.91931	3.27666	0.561958	0.171503	-2.54369	0.58971	1
98072824	0.959655	1.63833	0.280979	0.171503	-2.54369	0.474513	1
98073037	0.959655	1.63833	0.280979	0.171503	-2.54369	0.587807	1
98073161	0.959655	1.63833	0.280979	0.171503	-2.54369	0.643565	1
98074077	0.959655	1.63833	0.280979	0.171503	-2.54369	0.352981	1
98076359	0.959655	1.63833	0.280979	0.171503	-2.54369	0.46234	1
98077666	0.959655	1.63833	0.280979	0.171503	-2.54369	0.483237	1
98078024	0.959655	1.63833	0.280979	0.171503	-2.54369	0.510606	1
98078653	0.959655	1.63833	0.280979	0.171503	-2.54369	0.328825	1
98040190	5.41862	9.24979	1.58745	0.171621	-2.54271	0.0623046	1
98047374	3.88306	6.62737	1.13875	0.171826	-2.54098	0.0572463	1
98034047	7.10433	12.1208	2.08781	0.172249	-2.53743	0.0397185	1
98047766	2.01185	3.43206	0.591632	0.172384	-2.5363	0.13258	1
98002451	1.0055	1.71518	0.295816	0.17247	-2.53558	0.470347	1
98004859	1.0055	1.71518	0.295816	0.17247	-2.53558	0.540334	1
98011998	1.0055	1.71518	0.295816	0.17247	-2.53558	0.439665	1
98026759	1.0055	1.71518	0.295816	0.17247	-2.53558	0.424441	1
98030819	1.0055	1.71518	0.295816	0.17247	-2.53558	0.400454	1
98019724	1.95695	3.33711	0.576795	0.172843	-2.53247	0.269381	1
98058742	1.95695	3.33711	0.576795	0.172843	-2.53247	0.226111	1
98030356	5.95885	10.1577	1.76006	0.173274	-2.52887	0.53997	1
98009208	3.11124	5.30311	0.919379	0.173366	-2.52811	0.0706191	1
98067301	1.20833	2.05924	0.357421	0.17357	-2.52641	0.294523	1
98075738	1.20833	2.05924	0.357421	0.17357	-2.52641	0.267231	1
98015551	1.94961	3.32243	0.576795	0.173607	-2.52611	0.12348	1
98027920	1.94961	3.32243	0.576795	0.173607	-2.52611	0.204818	1
98006073	3.1039	5.28842	0.919379	0.173848	-2.52411	0.118295	1
98003589	0.998154	1.70049	0.295816	0.173959	-2.52318	0.390943	1
98008520	0.998154	1.70049	0.295816	0.173959	-2.52318	0.298543	1
98019828	0.998154	1.70049	0.295816	0.173959	-2.52318	0.294382	1
98060997	2.89373	4.92968	0.857774	0.174002	-2.52282	0.162082	1
98002591	2.15159	3.66478	0.6384	0.174199	-2.52119	0.143207	1
98063350	2.15159	3.66478	0.6384	0.174199	-2.52119	0.184337	1
98059172	1.94227	3.30774	0.576795	0.174377	-2.51972	0.31132	1
98036974	2.93222	4.99184	0.872611	0.174808	-2.51616	0.0589631	1
98013143	1.20013	2.04284	0.357421	0.174963	-2.51488	0.310443	1
98034527	1.20013	2.04284	0.357421	0.174963	-2.51488	0.330336	1
98077198	1.20013	2.04284	0.357421	0.174963	-2.51488	0.264846	1
98006433	1.93407	3.29135	0.576795	0.175246	-2.51255	0.281053	1
98070664	1.93407	3.29135	0.576795	0.175246	-2.51255	0.181588	1
98025827	0.989956	1.6841	0.295816	0.175653	-2.5092	0.46438	1
98030381	0.989956	1.6841	0.295816	0.175653	-2.5092	0.506495	1
98030582	0.989956	1.6841	0.295816	0.175653	-2.5092	0.539016	1
98077949	0.989956	1.6841	0.295816	0.175653	-2.5092	0.384767	1
98070466	1.87949	3.19702	0.561958	0.175776	-2.50819	0.199639	1
98010015	1.19279	2.02816	0.357421	0.17623	-2.50447	0.215615	1
98019201	1.19279	2.02816	0.357421	0.17623	-2.50447	0.227007	1
98029521	1.19279	2.02816	0.357421	0.17623	-2.50447	0.282525	1
98035930	1.19279	2.02816	0.357421	0.17623	-2.50447	0.283549	1
98034244	2.12871	3.61901	0.6384	0.176402	-2.50306	0.293623	1
98077522	2.12871	3.61901	0.6384	0.176402	-2.50306	0.21652	1
98014796	2.37738	4.03992	0.714842	0.176945	-2.49863	0.0732534	1
98000202	0.982613	1.66941	0.295816	0.177198	-2.49657	0.412114	1
98009215	0.982613	1.66941	0.295816	0.177198	-2.49657	0.315941	1
98026936	0.982613	1.66941	0.295816	0.177198	-2.49657	0.504015	1
98054067	0.982613	1.66941	0.295816	0.177198	-2.49657	0.372363	1
98074253	0.982613	1.66941	0.295816	0.177198	-2.49657	0.333655	1
98001572	1.18459	2.01176	0.357421	0.177666	-2.49276	0.254145	1
98012492	1.18459	2.01176	0.357421	0.177666	-2.49276	0.338067	1
98018297	1.18459	2.01176	0.357421	0.177666	-2.49276	0.33763	1
98026509	1.18459	2.01176	0.357421	0.177666	-2.49276	0.338057	1
98075498	1.18459	2.01176	0.357421	0.177666	-2.49276	0.395348	1
98003608	0.92803	1.57508	0.280979	0.17839	-2.48689	0.526231	1
98006215	0.92803	1.57508	0.280979	0.17839	-2.48689	0.463771	1
98030544	0.92803	1.57508	0.280979	0.17839	-2.48689	0.442341	1
98053349	0.92803	1.57508	0.280979	0.17839	-2.48689	0.460452	1
98068810	0.92803	1.57508	0.280979	0.17839	-2.48689	0.572522	1
98003933	2.83102	4.80427	0.857774	0.178544	-2.48565	0.137312	1
98000649	0.974416	1.65302	0.295816	0.178955	-2.48233	0.540361	1
98002327	0.974416	1.65302	0.295816	0.178955	-2.48233	0.533651	1
98003573	0.974416	1.65302	0.295816	0.178955	-2.48233	0.791134	1
98006509	0.974416	1.65302	0.295816	0.178955	-2.48233	0.50969	1
98010072	0.974416	1.65302	0.295816	0.178955	-2.48233	0.526254	1
98016798	0.974416	1.65302	0.295816	0.178955	-2.48233	0.520953	1
98018267	0.974416	1.65302	0.295816	0.178955	-2.48233	0.519478	1
98019051	0.974416	1.65302	0.295816	0.178955	-2.48233	0.508823	1
98025335	0.974416	1.65302	0.295816	0.178955	-2.48233	0.503146	1
98032714	0.974416	1.65302	0.295816	0.178955	-2.48233	0.436183	1
98037709	0.974416	1.65302	0.295816	0.178955	-2.48233	0.495042	1
98051476	0.974416	1.65302	0.295816	0.178955	-2.48233	0.467695	1
98052149	0.974416	1.65302	0.295816	0.178955	-2.48233	0.46883	1
98054007	0.974416	1.65302	0.295816	0.178955	-2.48233	0.486324	1
98056362	0.974416	1.65302	0.295816	0.178955	-2.48233	0.494464	1
98062052	0.974416	1.65302	0.295816	0.178955	-2.48233	0.402209	1
98071560	0.974416	1.65302	0.295816	0.178955	-2.48233	0.467418	1
98072361	0.974416	1.65302	0.295816	0.178955	-2.48233	0.566929	1
98073201	0.974416	1.65302	0.295816	0.178955	-2.48233	0.566929	1
98074774	0.974416	1.65302	0.295816	0.178955	-2.48233	0.513531	1
98075546	0.974416	1.65302	0.295816	0.178955	-2.48233	0.443667	1
98076276	0.974416	1.65302	0.295816	0.178955	-2.48233	0.493274	1
98078395	0.974416	1.65302	0.295816	0.178955	-2.48233	0.487027	1
98002177	1.17725	1.99708	0.357421	0.178972	-2.48219	0.341338	1
98007720	1.17725	1.99708	0.357421	0.178972	-2.48219	0.384699	1
98010625	1.17725	1.99708	0.357421	0.178972	-2.48219	0.262855	1
98039801	1.17725	1.99708	0.357421	0.178972	-2.48219	0.446876	1
98016186	1.84841	3.13486	0.561958	0.179261	-2.47986	0.255083	1
98009913	2.09708	3.55576	0.6384	0.17954	-2.47763	0.141844	1
98072613	1.94149	3.29135	0.591632	0.179754	-2.47591	0.14552	1
98003666	2.90856	4.92968	0.887448	0.180022	-2.47376	0.137629	1
98039572	1.84106	3.12017	0.561958	0.180105	-2.47309	0.19393	1
98071402	1.84106	3.12017	0.561958	0.180105	-2.47309	0.313054	1
98008253	1.84052	3.11908	0.561958	0.180168	-2.47259	0.24374	1
98002326	1.16905	1.98068	0.357421	0.180454	-2.4703	0.364905	1
98026500	1.16905	1.98068	0.357421	0.180454	-2.4703	0.373331	1
98032811	1.16905	1.98068	0.357421	0.180454	-2.4703	0.393474	1
98064536	1.16905	1.98068	0.357421	0.180454	-2.4703	0.303025	1
98068377	1.16905	1.98068	0.357421	0.180454	-2.4703	0.362403	1
98070083	1.16905	1.98068	0.357421	0.180454	-2.4703	0.393474	1
98001640	0.967073	1.63833	0.295816	0.180559	-2.46945	0.545118	1
98003443	0.967073	1.63833	0.295816	0.180559	-2.46945	0.484828	1
98007397	0.967073	1.63833	0.295816	0.180559	-2.46945	0.591838	1
98011868	0.967073	1.63833	0.295816	0.180559	-2.46945	0.705507	1
98018947	0.967073	1.63833	0.295816	0.180559	-2.46945	0.608089	1
98019975	0.967073	1.63833	0.295816	0.180559	-2.46945	0.426476	1
98024874	0.967073	1.63833	0.295816	0.180559	-2.46945	0.562778	1
98039581	0.967073	1.63833	0.295816	0.180559	-2.46945	0.286736	1
98040328	0.967073	1.63833	0.295816	0.180559	-2.46945	0.428005	1
98040376	0.967073	1.63833	0.295816	0.180559	-2.46945	0.53983	1
98042587	0.967073	1.63833	0.295816	0.180559	-2.46945	0.557982	1
98047165	0.967073	1.63833	0.295816	0.180559	-2.46945	0.513016	1
98047922	0.967073	1.63833	0.295816	0.180559	-2.46945	0.59254	1
98053209	0.967073	1.63833	0.295816	0.180559	-2.46945	0.486219	1
98056310	0.967073	1.63833	0.295816	0.180559	-2.46945	0.303815	1
98056687	0.967073	1.63833	0.295816	0.180559	-2.46945	0.317178	1
98057283	0.967073	1.63833	0.295816	0.180559	-2.46945	0.341417	1
98057710	0.967073	1.63833	0.295816	0.180559	-2.46945	0.374564	1
98058304	0.967073	1.63833	0.295816	0.180559	-2.46945	0.429699	1
98059943	0.967073	1.63833	0.295816	0.180559	-2.46945	0.537392	1
98066355	0.967073	1.63833	0.295816	0.180559	-2.46945	0.606204	1
98069812	0.967073	1.63833	0.295816	0.180559	-2.46945	0.643649	1
98071028	0.967073	1.63833	0.295816	0.180559	-2.46945	0.588728	1
98075156	0.967073	1.63833	0.295816	0.180559	-2.46945	0.59254	1
98076740	0.967073	1.63833	0.295816	0.180559	-2.46945	0.588728	1
98078859	0.967073	1.63833	0.295816	0.180559	-2.46945	0.416146	1
98039236	2.08154	3.52468	0.6384	0.181123	-2.46496	0.12806	1
98003941	1.16171	1.966	0.357421	0.181802	-2.45956	0.412745	1
98011980	1.16171	1.966	0.357421	0.181802	-2.45956	0.556659	1
98033056	1.16171	1.966	0.357421	0.181802	-2.45956	0.588407	1
98039326	1.16171	1.966	0.357421	0.181802	-2.45956	0.268919	1
98049247	1.16171	1.966	0.357421	0.181802	-2.45956	0.567282	1
98049927	1.16171	1.966	0.357421	0.181802	-2.45956	0.556659	1
98056911	1.16171	1.966	0.357421	0.181802	-2.45956	0.419504	1
98006874	0.91249	1.544	0.280979	0.181981	-2.45814	0.550585	1
98026390	0.91249	1.544	0.280979	0.181981	-2.45814	0.457217	1
98029836	0.91249	1.544	0.280979	0.181981	-2.45814	0.403012	1
98031769	0.91249	1.544	0.280979	0.181981	-2.45814	0.471824	1
98031869	0.91249	1.544	0.280979	0.181981	-2.45814	0.476381	1
98046599	0.91249	1.544	0.280979	0.181981	-2.45814	0.450325	1
98049026	0.91249	1.544	0.280979	0.181981	-2.45814	0.506817	1
98055444	0.91249	1.544	0.280979	0.181981	-2.45814	0.437685	1
98064974	0.91249	1.544	0.280979	0.181981	-2.45814	0.496231	1
98066503	0.91249	1.544	0.280979	0.181981	-2.45814	0.427591	1
98050479	1.87137	3.16594	0.576795	0.182188	-2.4565	0.243703	1
98054241	1.86402	3.15125	0.576795	0.183037	-2.44979	0.177128	1
98027235	4.77946	8.07984	1.47908	0.183058	-2.44963	0.0960248	1
98003140	2.05866	3.47892	0.6384	0.183505	-2.44611	0.116875	1
98043265	2.0578	3.47721	0.6384	0.183596	-2.4454	0.188904	1
98025190	1.85583	3.13486	0.576795	0.183994	-2.44227	0.189028	1
98038367	1.85583	3.13486	0.576795	0.183994	-2.44227	0.236101	1
98061407	1.90252	3.21341	0.591632	0.184113	-2.44133	0.166748	1
98055902	75.0718	126.77	23.374	0.184382	-2.43923	0.00834539	1
98051239	1.8021	3.04224	0.561958	0.184719	-2.4366	0.165611	1
98069311	1.8021	3.04224	0.561958	0.184719	-2.4366	0.136253	1
98014026	2.84586	4.80427	0.887448	0.184721	-2.43658	0.173795	1
98051120	1.89432	3.19702	0.591632	0.185058	-2.43395	0.207595	1
98004427	2.83766	4.78787	0.887448	0.185353	-2.43165	0.0997103	1
98001117	0.89695	1.51292	0.280979	0.18572	-2.4288	0.438537	1
98006480	0.89695	1.51292	0.280979	0.18572	-2.4288	0.430833	1
98012513	0.89695	1.51292	0.280979	0.18572	-2.4288	0.439945	1
98018954	0.89695	1.51292	0.280979	0.18572	-2.4288	0.525969	1
98019364	0.89695	1.51292	0.280979	0.18572	-2.4288	0.576443	1
98019984	0.89695	1.51292	0.280979	0.18572	-2.4288	0.513267	1
98055398	0.89695	1.51292	0.280979	0.18572	-2.4288	0.382904	1
98060905	0.89695	1.51292	0.280979	0.18572	-2.4288	0.50501	1
98064667	0.89695	1.51292	0.280979	0.18572	-2.4288	0.524383	1
98071969	0.89695	1.51292	0.280979	0.18572	-2.4288	0.451788	1
98079623	0.89695	1.51292	0.280979	0.18572	-2.4288	0.52744	1
98001598	2.73809	4.61841	0.857774	0.18573	-2.42872	0.203898	1
98056974	3.82882	6.45728	1.20036	0.185892	-2.42746	0.0732319	1
98008256	2.83032	4.77319	0.887448	0.185924	-2.42722	0.206325	1
98033302	2.02703	3.41567	0.6384	0.186904	-2.41963	0.154271	1
98057345	1.77836	2.99476	0.561958	0.187647	-2.41391	0.20098	1
98076758	1.77836	2.99476	0.561958	0.187647	-2.41391	0.287694	1
98031224	1.87144	3.15125	0.591632	0.187745	-2.41315	0.155959	1
98000583	0.888752	1.49653	0.280979	0.187754	-2.41308	0.801741	1
98016704	0.888752	1.49653	0.280979	0.187754	-2.41308	0.733427	1
98028253	0.888752	1.49653	0.280979	0.187754	-2.41308	0.653178	1
98036078	0.888752	1.49653	0.280979	0.187754	-2.41308	0.807719	1
98037737	0.888752	1.49653	0.280979	0.187754	-2.41308	0.802896	1
98040932	0.888752	1.49653	0.280979	0.187754	-2.41308	0.689612	1
98056380	0.888752	1.49653	0.280979	0.187754	-2.41308	0.758357	1
98060789	0.888752	1.49653	0.280979	0.187754	-2.41308	0.765628	1
98062984	0.888752	1.49653	0.280979	0.187754	-2.41308	0.605517	1
98064902	0.888752	1.49653	0.280979	0.187754	-2.41308	0.794431	1
98077400	0.888752	1.49653	0.280979	0.187754	-2.41308	0.802193	1
98000838	2.95483	4.97544	0.934216	0.187765	-2.413	0.0844002	1
98002007	0.935448	1.57508	0.295816	0.18781	-2.41265	0.571607	1
98004705	0.935448	1.57508	0.295816	0.18781	-2.41265	0.437847	1
98029551	0.935448	1.57508	0.295816	0.18781	-2.41265	0.460051	1
98068785	0.935448	1.57508	0.295816	0.18781	-2.41265	0.565789	1
98035869	1.13008	1.90275	0.357421	0.187845	-2.41239	0.34294	1
98043336	1.13008	1.90275	0.357421	0.187845	-2.41239	0.295855	1
98071040	3.59436	6.04997	1.13875	0.188225	-2.40947	0.125038	1
98029766	1.77102	2.98008	0.561958	0.188572	-2.40681	0.249745	1
98008870	1.86324	3.13486	0.591632	0.188727	-2.40563	0.184335	1
98049496	2.65157	4.46021	0.842937	0.188991	-2.40361	0.205886	1
98079720	2.24517	3.7755	0.714842	0.189337	-2.40097	0.274714	1
98019554	3.12604	5.25625	0.995822	0.189455	-2.40008	0.0530997	1
98001365	0.88141	1.48184	0.280979	0.189615	-2.39886	0.497311	1
98002227	0.88141	1.48184	0.280979	0.189615	-2.39886	0.413169	1
98003182	0.88141	1.48184	0.280979	0.189615	-2.39886	0.4919	1
98007762	0.88141	1.48184	0.280979	0.189615	-2.39886	0.490973	1
98014088	0.88141	1.48184	0.280979	0.189615	-2.39886	0.548818	1
98014596	0.88141	1.48184	0.280979	0.189615	-2.39886	0.578458	1
98015106	0.88141	1.48184	0.280979	0.189615	-2.39886	0.463829	1
98017115	0.88141	1.48184	0.280979	0.189615	-2.39886	0.457553	1
98018500	0.88141	1.48184	0.280979	0.189615	-2.39886	0.396981	1
98020055	0.88141	1.48184	0.280979	0.189615	-2.39886	0.489747	1
98021303	0.88141	1.48184	0.280979	0.189615	-2.39886	0.506747	1
98021433	0.88141	1.48184	0.280979	0.189615	-2.39886	0.466342	1
98022349	0.88141	1.48184	0.280979	0.189615	-2.39886	0.452193	1
98024093	0.88141	1.48184	0.280979	0.189615	-2.39886	0.484342	1
98025739	0.88141	1.48184	0.280979	0.189615	-2.39886	0.487322	1
98026347	0.88141	1.48184	0.280979	0.189615	-2.39886	0.578458	1
98027833	0.88141	1.48184	0.280979	0.189615	-2.39886	0.549896	1
98029646	0.88141	1.48184	0.280979	0.189615	-2.39886	0.463157	1
98034532	0.88141	1.48184	0.280979	0.189615	-2.39886	0.508684	1
98036522	0.88141	1.48184	0.280979	0.189615	-2.39886	0.505587	1
98041480	0.88141	1.48184	0.280979	0.189615	-2.39886	0.440489	1
98044722	0.88141	1.48184	0.280979	0.189615	-2.39886	0.428725	1
98047746	0.88141	1.48184	0.280979	0.189615	-2.39886	0.467861	1
98048823	0.88141	1.48184	0.280979	0.189615	-2.39886	0.352036	1
98049248	0.88141	1.48184	0.280979	0.189615	-2.39886	0.553658	1
98049643	0.88141	1.48184	0.280979	0.189615	-2.39886	0.582653	1
98051870	0.88141	1.48184	0.280979	0.189615	-2.39886	0.52636	1
98057648	1.76282	2.96368	0.561958	0.189615	-2.39886	0.231013	1
98059942	1.76282	2.96368	0.561958	0.189615	-2.39886	0.24328	1
98060535	0.88141	1.48184	0.280979	0.189615	-2.39886	0.553685	1
98066909	0.88141	1.48184	0.280979	0.189615	-2.39886	0.459297	1
98067760	0.88141	1.48184	0.280979	0.189615	-2.39886	0.529375	1
98068480	0.88141	1.48184	0.280979	0.189615	-2.39886	0.532697	1
98069406	0.88141	1.48184	0.280979	0.189615	-2.39886	0.551847	1
98071279	0.88141	1.48184	0.280979	0.189615	-2.39886	0.437013	1
98076553	0.88141	1.48184	0.280979	0.189615	-2.39886	0.530019	1
98077254	0.88141	1.48184	0.280979	0.189615	-2.39886	0.496253	1
98078774	1.76282	2.96368	0.561958	0.189615	-2.39886	0.174349	1
98078806	0.88141	1.48184	0.280979	0.189615	-2.39886	0.442997	1
98000656	1.8559	3.12017	0.591632	0.189615	-2.39885	0.377103	1
98069556	1.8559	3.12017	0.591632	0.189615	-2.39885	0.231991	1
98039345	8.16453	13.7261	2.603	0.189639	-2.39867	0.397649	1
98055724	1.99595	3.35351	0.6384	0.190368	-2.39314	0.148662	1
98003040	19.5485	32.8407	6.25628	0.190504	-2.39211	0.145463	1
98012271	1.11454	1.87167	0.357421	0.190964	-2.38863	0.271481	1
98026626	1.11454	1.87167	0.357421	0.190964	-2.38863	0.290117	1
98071274	1.11454	1.87167	0.357421	0.190964	-2.38863	0.355982	1
98013689	1.79398	3.01116	0.576795	0.191553	-2.38419	0.161651	1
98008935	0.919908	1.544	0.295816	0.191591	-2.3839	0.390363	1
98015440	1.79312	3.00945	0.576795	0.191662	-2.38337	0.329646	1
98058258	1.78578	2.99476	0.576795	0.192601	-2.37631	0.1955	1
98074173	1.78578	2.99476	0.576795	0.192601	-2.37631	0.252111	1
98057131	2.84628	4.77319	0.919379	0.192613	-2.37622	0.203402	1
98013563	1.10635	1.85527	0.357421	0.192652	-2.37593	0.426663	1
98028333	1.10635	1.85527	0.357421	0.192652	-2.37593	0.587921	1
98061366	1.10635	1.85527	0.357421	0.192652	-2.37593	0.449113	1
98076808	1.10635	1.85527	0.357421	0.192652	-2.37593	0.587193	1
98076694	1.73939	2.91683	0.561958	0.192661	-2.37586	0.262064	1
98033470	5.59101	9.3752	1.80683	0.192724	-2.37539	0.0626297	1
98062402	2.65165	4.44552	0.857774	0.192952	-2.37368	0.0993985	1
98030273	2.60526	4.36759	0.842937	0.192998	-2.37334	0.0841013	1
98070833	1.97307	3.30774	0.6384	0.193002	-2.37331	0.220912	1
98072368	1.97222	3.30603	0.6384	0.193102	-2.37257	0.234914	1
98059547	2.6443	4.43084	0.857774	0.193592	-2.36891	0.193725	1
98045377	3.46293	5.80195	1.12392	0.193714	-2.368	0.236552	1
98058462	1.73119	2.90043	0.561958	0.19375	-2.36773	0.260892	1
98022792	2.87689	4.81957	0.934216	0.193838	-2.36708	0.0505903	1
98027330	1.96487	3.29135	0.6384	0.193963	-2.36614	0.115873	1
98044887	3.92975	6.58269	1.2768	0.193963	-2.36614	0.175425	1
98037240	1.099	1.84059	0.357421	0.194189	-2.36447	0.313784	1
98041455	2.86924	4.80427	0.934216	0.194456	-2.36249	0.138051	1
98020734	1.77024	2.96368	0.576795	0.194621	-2.36126	0.255868	1
98034358	3.72777	6.24034	1.2152	0.194732	-2.36044	0.472409	1
98016000	1.95753	3.27666	0.6384	0.194833	-2.35969	0.518924	1
98047582	1.95753	3.27666	0.6384	0.194833	-2.35969	0.532765	1
98074127	1.95753	3.27666	0.6384	0.194833	-2.35969	0.419407	1
98006726	0.904368	1.51292	0.295816	0.195527	-2.35456	0.377473	1
98029291	0.904368	1.51292	0.295816	0.195527	-2.35456	0.546664	1
98036364	0.904368	1.51292	0.295816	0.195527	-2.35456	0.400095	1
98049770	0.904368	1.51292	0.295816	0.195527	-2.35456	0.48839	1
98054984	1.80874	3.02584	0.591632	0.195527	-2.35456	0.150498	1
98055863	0.904368	1.51292	0.295816	0.195527	-2.35456	0.460671	1
98059044	0.904368	1.51292	0.295816	0.195527	-2.35456	0.412162	1
98060720	0.904368	1.51292	0.295816	0.195527	-2.35456	0.48827	1
98074522	0.904368	1.51292	0.295816	0.195527	-2.35456	0.437728	1
98074530	0.904368	1.51292	0.295816	0.195527	-2.35456	0.420619	1
98079187	1.80874	3.02584	0.591632	0.195527	-2.35456	0.236255	1
98022753	4.43016	7.41091	1.44941	0.195577	-2.35419	0.315895	1
98060646	1.7629	2.949	0.576795	0.19559	-2.35409	0.341739	1
98068022	1.7629	2.949	0.576795	0.19559	-2.35409	0.284618	1
98014595	2.8537	4.77319	0.934216	0.195722	-2.35312	0.239087	1
98003665	2.18247	3.65009	0.714842	0.195842	-2.35224	0.0997684	1
98044847	1.71565	2.86935	0.561958	0.195849	-2.35219	0.232391	1
98004240	1.09081	1.82419	0.357421	0.195934	-2.35156	0.515833	1
98019773	1.09081	1.82419	0.357421	0.195934	-2.35156	0.415894	1
98030611	1.09081	1.82419	0.357421	0.195934	-2.35156	0.598747	1
98039023	1.09081	1.82419	0.357421	0.195934	-2.35156	0.476978	1
98059550	1.09081	1.82419	0.357421	0.195934	-2.35156	0.407987	1
98024098	2.65907	4.44552	0.872611	0.19629	-2.34894	0.0997562	1
98042230	1.80054	3.00945	0.591632	0.196592	-2.34673	0.242227	1
98000901	1.98783	3.32243	0.653237	0.196615	-2.34656	0.188121	1
98024400	1.70831	2.85467	0.561958	0.196856	-2.34479	0.214162	1
98003493	4.54647	7.59677	1.49617	0.196949	-2.34411	0.119085	1
98061751	2.83762	4.74102	0.934216	0.19705	-2.34337	0.129876	1
98055876	4.30545	7.19117	1.41973	0.197427	-2.34061	0.109683	1
98008509	1.08346	1.80951	0.357421	0.197524	-2.3399	0.31468	1
98010102	1.08346	1.80951	0.357421	0.197524	-2.3399	0.428561	1
98015397	1.08346	1.80951	0.357421	0.197524	-2.3399	0.400201	1
98016965	1.08346	1.80951	0.357421	0.197524	-2.3399	0.422847	1
98017009	1.08346	1.80951	0.357421	0.197524	-2.3399	0.278792	1
98023505	1.08346	1.80951	0.357421	0.197524	-2.3399	0.342293	1
98026314	1.08346	1.80951	0.357421	0.197524	-2.3399	0.352993	1
98031675	1.08346	1.80951	0.357421	0.197524	-2.3399	0.264677	1
98034851	1.08346	1.80951	0.357421	0.197524	-2.3399	0.367612	1
98038792	1.08346	1.80951	0.357421	0.197524	-2.3399	0.262985	1
98040388	2.16693	3.61901	0.714842	0.197524	-2.3399	0.22903	1
98040618	1.08346	1.80951	0.357421	0.197524	-2.3399	0.366281	1
98041535	1.08346	1.80951	0.357421	0.197524	-2.3399	0.371355	1
98041929	1.08346	1.80951	0.357421	0.197524	-2.3399	0.369518	1
98049190	1.08346	1.80951	0.357421	0.197524	-2.3399	0.362831	1
98054191	1.08346	1.80951	0.357421	0.197524	-2.3399	0.331623	1
98054271	1.08346	1.80951	0.357421	0.197524	-2.3399	0.405476	1
98055382	1.08346	1.80951	0.357421	0.197524	-2.3399	0.449299	1
98065185	1.08346	1.80951	0.357421	0.197524	-2.3399	0.353213	1
98076730	1.08346	1.80951	0.357421	0.197524	-2.3399	0.320366	1
98002127	0.896171	1.49653	0.295816	0.197669	-2.33884	0.755763	1
98025400	0.896171	1.49653	0.295816	0.197669	-2.33884	0.750365	1
98038963	0.896171	1.49653	0.295816	0.197669	-2.33884	0.594124	1
98040330	0.896171	1.49653	0.295816	0.197669	-2.33884	0.806063	1
98045986	0.896171	1.49653	0.295816	0.197669	-2.33884	0.808446	1
98054240	0.896171	1.49653	0.295816	0.197669	-2.33884	0.736568	1
98069732	0.896171	1.49653	0.295816	0.197669	-2.33884	0.801888	1
98079387	0.896171	1.49653	0.295816	0.197669	-2.33884	0.727554	1
98068783	1.74681	2.91683	0.576795	0.197748	-2.33827	0.186001	1
98070884	1.74681	2.91683	0.576795	0.197748	-2.33827	0.183221	1
98008617	3.00937	5.02292	0.995822	0.198256	-2.33457	0.0608489	1
98000100	7.01098	11.6999	2.32202	0.198464	-2.33305	0.174157	1
98065112	1.97229	3.29135	0.653237	0.198471	-2.333	0.354189	1
98079418	1.97229	3.29135	0.653237	0.198471	-2.333	0.278828	1
98030203	4.32841	7.22225	1.43457	0.198632	-2.33183	0.0253848	1
98060192	1.69192	2.82188	0.561958	0.199144	-2.32812	0.567633	1
98047622	56.4289	94.1111	18.7467	0.199197	-2.32773	0.119941	1
98054664	14.3018	23.8513	4.75241	0.199252	-2.32733	0.239487	1
98002135	0.888828	1.48184	0.295816	0.199628	-2.32462	0.512061	1
98004038	0.888828	1.48184	0.295816	0.199628	-2.32462	0.448415	1
98005491	0.888828	1.48184	0.295816	0.199628	-2.32462	0.530072	1
98005957	0.888828	1.48184	0.295816	0.199628	-2.32462	0.554223	1
98010566	0.888828	1.48184	0.295816	0.199628	-2.32462	0.476425	1
98019392	0.888828	1.48184	0.295816	0.199628	-2.32462	0.474491	1
98020923	1.77766	2.96368	0.591632	0.199628	-2.32462	0.187095	1
98025052	0.888828	1.48184	0.295816	0.199628	-2.32462	0.549186	1
98030305	0.888828	1.48184	0.295816	0.199628	-2.32462	0.479215	1
98035530	0.888828	1.48184	0.295816	0.199628	-2.32462	0.577491	1
98038481	0.888828	1.48184	0.295816	0.199628	-2.32462	0.406923	1
98039566	0.888828	1.48184	0.295816	0.199628	-2.32462	0.527448	1
98039906	0.888828	1.48184	0.295816	0.199628	-2.32462	0.438405	1
98046715	0.888828	1.48184	0.295816	0.199628	-2.32462	0.524061	1
98047236	0.888828	1.48184	0.295816	0.199628	-2.32462	0.577491	1
98050486	0.888828	1.48184	0.295816	0.199628	-2.32462	0.55345	1
98050614	0.888828	1.48184	0.295816	0.199628	-2.32462	0.477713	1
98054083	0.888828	1.48184	0.295816	0.199628	-2.32462	0.486115	1
98055411	0.888828	1.48184	0.295816	0.199628	-2.32462	0.42203	1
98057690	0.888828	1.48184	0.295816	0.199628	-2.32462	0.492597	1
98058857	0.888828	1.48184	0.295816	0.199628	-2.32462	0.514839	1
98058980	0.888828	1.48184	0.295816	0.199628	-2.32462	0.528388	1
98062970	0.888828	1.48184	0.295816	0.199628	-2.32462	0.408728	1
98068909	0.888828	1.48184	0.295816	0.199628	-2.32462	0.526545	1
98069377	0.888828	1.48184	0.295816	0.199628	-2.32462	0.552916	1
98070551	0.888828	1.48184	0.295816	0.199628	-2.32462	0.51192	1
98070765	1.77766	2.96368	0.591632	0.199628	-2.32462	0.243224	1
98074556	0.888828	1.48184	0.295816	0.199628	-2.32462	0.444939	1
98074973	0.888828	1.48184	0.295816	0.199628	-2.32462	0.456131	1
98001639	0.842442	1.4039	0.280979	0.200141	-2.32091	0.498869	1
98024560	0.842442	1.4039	0.280979	0.200141	-2.32091	0.471183	1
98025485	0.842442	1.4039	0.280979	0.200141	-2.32091	0.401649	1
98065997	0.842442	1.4039	0.280979	0.200141	-2.32091	0.438552	1
98020215	1.68457	2.80719	0.561958	0.200185	-2.32059	0.391948	1
98018937	3.72683	6.20879	1.24487	0.200501	-2.31832	0.0278632	1
98006555	7.29912	12.153	2.44523	0.201203	-2.31327	0.39352	1
98034584	1.67723	2.7925	0.561958	0.201238	-2.31302	0.469293	1
98007181	3.85158	6.41152	1.29164	0.201456	-2.31146	0.237814	1
98010108	1.90217	3.16594	0.6384	0.201647	-2.3101	0.234755	1
98017134	1.90217	3.16594	0.6384	0.201647	-2.3101	0.197657	1
98004538	1.71573	2.85467	0.576795	0.202054	-2.30719	0.15583	1
98011934	1.71573	2.85467	0.576795	0.202054	-2.30719	0.211529	1
98050838	1.71573	2.85467	0.576795	0.202054	-2.30719	0.253545	1
98070783	1.71573	2.85467	0.576795	0.202054	-2.30719	0.170842	1
98074458	1.71573	2.85467	0.576795	0.202054	-2.30719	0.227279	1
98008151	1.71488	2.85296	0.576795	0.202175	-2.30633	0.586894	1
98031722	1.66934	2.77673	0.561958	0.202381	-2.30485	0.236227	1
98052400	2.72907	4.53876	0.919379	0.202562	-2.30357	0.113052	1
98023480	1.89483	3.15125	0.6384	0.202586	-2.30339	0.251994	1
98043809	1.89397	3.14954	0.6384	0.202696	-2.30261	0.539611	1
98045327	1.89397	3.14954	0.6384	0.202696	-2.30261	0.521168	1
98020399	2.49594	4.14894	0.842937	0.20317	-2.29924	0.159393	1
98005668	1.70753	2.83827	0.576795	0.203221	-2.29888	0.332262	1
98054041	2.57348	4.27435	0.872611	0.204151	-2.29229	0.226768	1
98012429	1.70019	2.82359	0.576795	0.204278	-2.2914	0.240075	1
98014614	1.92513	3.19702	0.653237	0.204327	-2.29105	0.221655	1
98050529	4.45276	7.39452	1.51101	0.204342	-2.29094	0.104896	1
98055622	2.61198	4.33651	0.887448	0.204646	-2.2888	0.108186	1
98007968	0.826902	1.37282	0.280979	0.204672	-2.28861	0.508972	1
98012140	0.826902	1.37282	0.280979	0.204672	-2.28861	0.49752	1
98012231	0.826902	1.37282	0.280979	0.204672	-2.28861	0.43686	1
98017643	0.826902	1.37282	0.280979	0.204672	-2.28861	0.533591	1
98024268	0.826902	1.37282	0.280979	0.204672	-2.28861	0.503137	1
98030795	0.826902	1.37282	0.280979	0.204672	-2.28861	0.465764	1
98035936	0.826902	1.37282	0.280979	0.204672	-2.28861	0.480613	1
98038480	0.826902	1.37282	0.280979	0.204672	-2.28861	0.444318	1
98043237	0.826902	1.37282	0.280979	0.204672	-2.28861	0.483634	1
98045839	0.826902	1.37282	0.280979	0.204672	-2.28861	0.465534	1
98055031	0.826902	1.37282	0.280979	0.204672	-2.28861	0.434275	1
98059420	0.826902	1.37282	0.280979	0.204672	-2.28861	0.529133	1
98065854	0.826902	1.37282	0.280979	0.204672	-2.28861	0.480163	1
98067245	0.826902	1.37282	0.280979	0.204672	-2.28861	0.554568	1
98067965	0.826902	1.37282	0.280979	0.204672	-2.28861	0.58584	1
98068960	0.826902	1.37282	0.280979	0.204672	-2.28861	0.441592	1
98069764	0.826902	1.37282	0.280979	0.204672	-2.28861	0.47549	1
98074884	0.826902	1.37282	0.280979	0.204672	-2.28861	0.534797	1
98057589	1.73869	2.88575	0.591632	0.205019	-2.28617	0.182612	1
98062690	1.91778	3.18233	0.653237	0.20527	-2.2844	0.219825	1
98047368	1.69199	2.80719	0.576795	0.205471	-2.283	0.346547	1
98031806	2.09688	3.47892	0.714842	0.205478	-2.28294	0.165797	1
98051223	3.33845	5.53815	1.13875	0.20562	-2.28195	0.0500743	1
98026261	2.55739	4.24218	0.872611	0.205699	-2.28139	0.137757	1
98030699	1.64561	2.72926	0.561958	0.205902	-2.27997	0.239675	1
98077657	0.865401	1.43499	0.295816	0.206146	-2.27826	0.430147	1
98012071	1.0445	1.73157	0.357421	0.206414	-2.27638	0.343174	1
98066708	1.0445	1.73157	0.357421	0.206414	-2.27638	0.322547	1
98003534	2.08868	3.46252	0.714842	0.206451	-2.27613	0.171462	1
98003946	1.68465	2.7925	0.576795	0.206551	-2.27543	0.422899	1
98028972	1.68465	2.7925	0.576795	0.206551	-2.27543	0.463424	1
98037977	1.68465	2.7925	0.576795	0.206551	-2.27543	0.175682	1
98045602	1.68465	2.7925	0.576795	0.206551	-2.27543	0.406825	1
98067875	1.68465	2.7925	0.576795	0.206551	-2.27543	0.214454	1
98065777	5.58984	9.26447	1.9152	0.206725	-2.27421	0.0352977	1
98079249	1.63826	2.71457	0.561958	0.207016	-2.27219	0.212605	1
98032884	26.5494	43.9909	9.10795	0.207042	-2.27201	0.109758	1
98002021	1.63741	2.71286	0.561958	0.207146	-2.27128	0.401247	1
98027712	0.818705	1.35643	0.280979	0.207146	-2.27128	0.59381	1
98066987	0.818705	1.35643	0.280979	0.207146	-2.27128	0.689396	1
98008117	1.90139	3.14954	0.653237	0.207407	-2.26946	0.278393	1
98062961	2.49601	4.13425	0.857774	0.20748	-2.26896	0.414801	1
98006978	1.85586	3.07332	0.6384	0.207724	-2.26726	0.288981	1
98036189	1.63007	2.69817	0.561958	0.208273	-2.26345	0.277442	1
98040728	1.0363	1.71518	0.357421	0.208387	-2.26266	0.450486	1
98050195	1.0363	1.71518	0.357421	0.208387	-2.26266	0.559914	1
98004418	3.52326	5.83132	1.2152	0.208391	-2.26263	0.306458	1
98014715	1.71495	2.83827	0.591632	0.208448	-2.26224	0.326884	1
98054862	4.11054	6.80134	1.41973	0.208743	-2.2602	0.068983	1
98004135	1.66857	2.76034	0.576795	0.208958	-2.25871	0.286618	1
98058359	1.8867	3.12017	0.653237	0.209359	-2.25595	0.355149	1
98000363	0.811362	1.34174	0.280979	0.209413	-2.25558	0.40868	1
98004581	0.811362	1.34174	0.280979	0.209413	-2.25558	0.514087	1
98010921	0.811362	1.34174	0.280979	0.209413	-2.25558	0.425292	1
98030504	0.811362	1.34174	0.280979	0.209413	-2.25558	0.436274	1
98035396	0.811362	1.34174	0.280979	0.209413	-2.25558	0.511442	1
98039808	0.811362	1.34174	0.280979	0.209413	-2.25558	0.588038	1
98040215	0.811362	1.34174	0.280979	0.209413	-2.25558	0.42217	1
98047046	0.811362	1.34174	0.280979	0.209413	-2.25558	0.508492	1
98069124	0.811362	1.34174	0.280979	0.209413	-2.25558	0.529878	1
98079734	0.811362	1.34174	0.280979	0.209413	-2.25558	0.502875	1
98035508	1.62187	2.68178	0.561958	0.209547	-2.25466	0.418909	1
98078798	1.62187	2.68178	0.561958	0.209547	-2.25466	0.449019	1
98024893	1.84032	3.04224	0.6384	0.209846	-2.2526	0.162547	1
98037614	1.02896	1.70049	0.357421	0.210187	-2.25025	0.408298	1
98047142	1.02896	1.70049	0.357421	0.210187	-2.25025	0.407602	1
98070144	1.02896	1.70049	0.357421	0.210187	-2.25025	0.387604	1
98027406	75.9441	125.506	26.3819	0.210204	-2.25014	0.00177865	1
98019467	0.849861	1.4039	0.295816	0.21071	-2.24667	0.551852	1
98058390	2.54927	4.2111	0.887448	0.210741	-2.24646	0.129049	1
98005804	1.69941	2.80719	0.591632	0.210756	-2.24635	0.275529	1
98011490	1.83212	3.02584	0.6384	0.210983	-2.2448	0.235058	1
98053950	2.50343	4.13425	0.872611	0.211069	-2.24421	0.359211	1
98048345	2.04971	3.38459	0.714842	0.211205	-2.24328	0.141601	1
98012232	1.65303	2.72926	0.576795	0.211338	-2.24238	0.32742	1
98010615	3.26021	5.38166	1.13875	0.211599	-2.2406	0.0956477	1
98045549	3.69594	6.10025	1.29164	0.211735	-2.23967	0.283821	1
98046212	1.69207	2.7925	0.591632	0.211864	-2.23879	0.458363	1
98020078	1.60718	2.65241	0.561958	0.211867	-2.23877	0.275612	1
98021768	1.60718	2.65241	0.561958	0.211867	-2.23877	0.479318	1
98047535	1.60718	2.65241	0.561958	0.211867	-2.23877	0.346692	1
98004072	0.803165	1.32535	0.280979	0.212004	-2.23784	0.619199	1
98004571	0.803165	1.32535	0.280979	0.212004	-2.23784	0.688406	1
98005132	0.803165	1.32535	0.280979	0.212004	-2.23784	0.706906	1
98006165	0.803165	1.32535	0.280979	0.212004	-2.23784	0.655407	1
98008035	0.803165	1.32535	0.280979	0.212004	-2.23784	0.626033	1
98012465	0.803165	1.32535	0.280979	0.212004	-2.23784	0.67601	1
98016078	0.803165	1.32535	0.280979	0.212004	-2.23784	0.671968	1
98016277	0.803165	1.32535	0.280979	0.212004	-2.23784	0.591999	1
98017431	0.803165	1.32535	0.280979	0.212004	-2.23784	0.703524	1
98019581	0.803165	1.32535	0.280979	0.212004	-2.23784	0.643535	1
98020002	0.803165	1.32535	0.280979	0.212004	-2.23784	0.658624	1
98021169	0.803165	1.32535	0.280979	0.212004	-2.23784	0.706906	1
98026601	0.803165	1.32535	0.280979	0.212004	-2.23784	0.703524	1
98032361	0.803165	1.32535	0.280979	0.212004	-2.23784	0.66814	1
98039053	0.803165	1.32535	0.280979	0.212004	-2.23784	0.672612	1
98039382	0.803165	1.32535	0.280979	0.212004	-2.23784	0.704025	1
98040228	0.803165	1.32535	0.280979	0.212004	-2.23784	0.651731	1
98040747	0.803165	1.32535	0.280979	0.212004	-2.23784	0.661914	1
98042010	0.803165	1.32535	0.280979	0.212004	-2.23784	0.673209	1
98045304	0.803165	1.32535	0.280979	0.212004	-2.23784	0.648117	1
98047153	0.803165	1.32535	0.280979	0.212004	-2.23784	0.605993	1
98048664	0.803165	1.32535	0.280979	0.212004	-2.23784	0.686833	1
98049329	0.803165	1.32535	0.280979	0.212004	-2.23784	0.587294	1
98050003	0.803165	1.32535	0.280979	0.212004	-2.23784	0.671735	1
98054025	0.803165	1.32535	0.280979	0.212004	-2.23784	0.676692	1
98056987	0.803165	1.32535	0.280979	0.212004	-2.23784	0.650007	1
98061403	0.803165	1.32535	0.280979	0.212004	-2.23784	0.628639	1
98065631	0.803165	1.32535	0.280979	0.212004	-2.23784	0.680585	1
98068114	0.803165	1.32535	0.280979	0.212004	-2.23784	0.678573	1
98069322	0.803165	1.32535	0.280979	0.212004	-2.23784	0.681756	1
98071748	0.803165	1.32535	0.280979	0.212004	-2.23784	0.693557	1
98073531	0.803165	1.32535	0.280979	0.212004	-2.23784	0.688041	1
98073811	0.803165	1.32535	0.280979	0.212004	-2.23784	0.615463	1
98074382	0.803165	1.32535	0.280979	0.212004	-2.23784	0.640754	1
98074503	0.803165	1.32535	0.280979	0.212004	-2.23784	0.64302	1
98075435	0.803165	1.32535	0.280979	0.212004	-2.23784	0.660919	1
98078084	0.803165	1.32535	0.280979	0.212004	-2.23784	0.659007	1
98078459	0.803165	1.32535	0.280979	0.212004	-2.23784	0.670316	1
98079530	0.803165	1.32535	0.280979	0.212004	-2.23784	0.622702	1
98048932	52.8645	87.2346	18.4944	0.212008	-2.23781	0.00277849	1
98017802	1.02076	1.6841	0.357421	0.212233	-2.23628	0.481367	1
98077796	1.02076	1.6841	0.357421	0.212233	-2.23628	0.541021	1
98014693	4.35031	7.17478	1.52585	0.212668	-2.23332	0.0481513	1
98030534	1.59899	2.63601	0.561958	0.213185	-2.22982	0.283996	1
98047464	1.59899	2.63601	0.561958	0.213185	-2.22982	0.423498	1
98071022	1.59899	2.63601	0.561958	0.213185	-2.22982	0.306066	1
98075505	1.59899	2.63601	0.561958	0.213185	-2.22982	0.287741	1
98026507	2.44065	4.02352	0.857774	0.21319	-2.22979	0.230908	1
98074845	2.44065	4.02352	0.857774	0.21319	-2.22979	0.143276	1
98037097	5.21524	8.59399	1.8365	0.213696	-2.22637	0.0833358	1
98024770	1.63749	2.69817	0.576795	0.213772	-2.22585	0.271885	1
98029874	1.63749	2.69817	0.576795	0.213772	-2.22585	0.302466	1
98032052	2.8685	4.72633	1.01066	0.213836	-2.22543	0.0854162	1
98019123	1.01342	1.66941	0.357421	0.2141	-2.22364	0.323168	1
98022992	1.01342	1.66941	0.357421	0.2141	-2.22364	0.446776	1
98029358	1.01342	1.66941	0.357421	0.2141	-2.22364	0.292781	1
98033689	1.01342	1.66941	0.357421	0.2141	-2.22364	0.323866	1
98036147	1.01342	1.66941	0.357421	0.2141	-2.22364	0.436159	1
98051345	1.01342	1.66941	0.357421	0.2141	-2.22364	0.367862	1
98059084	1.01342	1.66941	0.357421	0.2141	-2.22364	0.272615	1
98061989	1.01342	1.66941	0.357421	0.2141	-2.22364	0.371408	1
98062571	1.01342	1.66941	0.357421	0.2141	-2.22364	0.279253	1
98069851	1.01342	1.66941	0.357421	0.2141	-2.22364	0.368593	1
98061846	4.10898	6.76855	1.44941	0.214138	-2.22339	0.226714	1
98000940	0.795822	1.31066	0.280979	0.214379	-2.22176	0.418918	1
98002101	0.795822	1.31066	0.280979	0.214379	-2.22176	0.530314	1
98002578	0.795822	1.31066	0.280979	0.214379	-2.22176	0.542097	1
98004643	0.795822	1.31066	0.280979	0.214379	-2.22176	0.370237	1
98005020	0.795822	1.31066	0.280979	0.214379	-2.22176	0.483885	1
98007436	0.795822	1.31066	0.280979	0.214379	-2.22176	0.473642	1
98008283	0.795822	1.31066	0.280979	0.214379	-2.22176	0.738337	1
98008677	0.795822	1.31066	0.280979	0.214379	-2.22176	0.520896	1
98011865	0.795822	1.31066	0.280979	0.214379	-2.22176	0.465165	1
98012638	0.795822	1.31066	0.280979	0.214379	-2.22176	0.534297	1
98014699	0.795822	1.31066	0.280979	0.214379	-2.22176	0.609061	1
98014898	0.795822	1.31066	0.280979	0.214379	-2.22176	0.675008	1
98015246	0.795822	1.31066	0.280979	0.214379	-2.22176	0.738337	1
98015669	0.795822	1.31066	0.280979	0.214379	-2.22176	0.738337	1
98016187	0.795822	1.31066	0.280979	0.214379	-2.22176	0.522368	1
98016865	0.795822	1.31066	0.280979	0.214379	-2.22176	0.582298	1
98018506	0.795822	1.31066	0.280979	0.214379	-2.22176	0.738337	1
98018747	0.795822	1.31066	0.280979	0.214379	-2.22176	0.650017	1
98018992	0.795822	1.31066	0.280979	0.214379	-2.22176	0.67318	1
98019036	0.795822	1.31066	0.280979	0.214379	-2.22176	0.438242	1
98019707	0.795822	1.31066	0.280979	0.214379	-2.22176	0.53416	1
98019917	0.795822	1.31066	0.280979	0.214379	-2.22176	0.627787	1
98020009	0.795822	1.31066	0.280979	0.214379	-2.22176	0.673894	1
98021320	0.795822	1.31066	0.280979	0.214379	-2.22176	0.738337	1
98021499	0.795822	1.31066	0.280979	0.214379	-2.22176	0.600031	1
98024180	0.795822	1.31066	0.280979	0.214379	-2.22176	0.501889	1
98024439	0.795822	1.31066	0.280979	0.214379	-2.22176	0.578709	1
98024585	0.795822	1.31066	0.280979	0.214379	-2.22176	0.675008	1
98025182	0.795822	1.31066	0.280979	0.214379	-2.22176	0.581332	1
98026409	0.795822	1.31066	0.280979	0.214379	-2.22176	0.468227	1
98027911	0.795822	1.31066	0.280979	0.214379	-2.22176	0.581332	1
98029841	0.795822	1.31066	0.280979	0.214379	-2.22176	0.682804	1
98030969	0.795822	1.31066	0.280979	0.214379	-2.22176	0.542704	1
98031068	0.795822	1.31066	0.280979	0.214379	-2.22176	0.673894	1
98032333	0.795822	1.31066	0.280979	0.214379	-2.22176	0.612035	1
98033423	0.795822	1.31066	0.280979	0.214379	-2.22176	0.460239	1
98033803	0.795822	1.31066	0.280979	0.214379	-2.22176	0.458873	1
98034702	0.795822	1.31066	0.280979	0.214379	-2.22176	0.477033	1
98036926	0.795822	1.31066	0.280979	0.214379	-2.22176	0.738337	1
98037883	0.795822	1.31066	0.280979	0.214379	-2.22176	0.58647	1
98038694	0.795822	1.31066	0.280979	0.214379	-2.22176	0.383487	1
98042487	0.795822	1.31066	0.280979	0.214379	-2.22176	0.572235	1
98046700	0.795822	1.31066	0.280979	0.214379	-2.22176	0.623955	1
98049350	0.795822	1.31066	0.280979	0.214379	-2.22176	0.463071	1
98050488	0.795822	1.31066	0.280979	0.214379	-2.22176	0.673894	1
98050543	1.59164	2.62133	0.561958	0.214379	-2.22176	0.218838	1
98052409	1.59164	2.62133	0.561958	0.214379	-2.22176	0.313574	1
98053697	0.795822	1.31066	0.280979	0.214379	-2.22176	0.682804	1
98055200	0.795822	1.31066	0.280979	0.214379	-2.22176	0.646982	1
98055498	0.795822	1.31066	0.280979	0.214379	-2.22176	0.681786	1
98055614	0.795822	1.31066	0.280979	0.214379	-2.22176	0.67318	1
98055652	0.795822	1.31066	0.280979	0.214379	-2.22176	0.521365	1
98056556	0.795822	1.31066	0.280979	0.214379	-2.22176	0.562722	1
98057628	0.795822	1.31066	0.280979	0.214379	-2.22176	0.456849	1
98062035	0.795822	1.31066	0.280979	0.214379	-2.22176	0.540615	1
98062221	0.795822	1.31066	0.280979	0.214379	-2.22176	0.681786	1
98063247	0.795822	1.31066	0.280979	0.214379	-2.22176	0.407939	1
98063437	0.795822	1.31066	0.280979	0.214379	-2.22176	0.404654	1
98064136	0.795822	1.31066	0.280979	0.214379	-2.22176	0.391387	1
98064492	0.795822	1.31066	0.280979	0.214379	-2.22176	0.419082	1
98065361	0.795822	1.31066	0.280979	0.214379	-2.22176	0.673894	1
98065980	0.795822	1.31066	0.280979	0.214379	-2.22176	0.560801	1
98067076	0.795822	1.31066	0.280979	0.214379	-2.22176	0.443919	1
98067789	0.795822	1.31066	0.280979	0.214379	-2.22176	0.520642	1
98069070	0.795822	1.31066	0.280979	0.214379	-2.22176	0.620605	1
98069255	0.795822	1.31066	0.280979	0.214379	-2.22176	0.498222	1
98069568	0.795822	1.31066	0.280979	0.214379	-2.22176	0.647328	1
98074897	0.795822	1.31066	0.280979	0.214379	-2.22176	0.612035	1
98075036	0.795822	1.31066	0.280979	0.214379	-2.22176	0.620605	1
98075625	0.795822	1.31066	0.280979	0.214379	-2.22176	0.573881	1
98076130	0.795822	1.31066	0.280979	0.214379	-2.22176	0.562044	1
98076338	0.795822	1.31066	0.280979	0.214379	-2.22176	0.464703	1
98077596	0.795822	1.31066	0.280979	0.214379	-2.22176	0.673894	1
98078094	0.795822	1.31066	0.280979	0.214379	-2.22176	0.618378	1
98078101	0.795822	1.31066	0.280979	0.214379	-2.22176	0.583039	1
98078673	0.795822	1.31066	0.280979	0.214379	-2.22176	0.547036	1
98078940	0.795822	1.31066	0.280979	0.214379	-2.22176	0.381114	1
98079678	0.795822	1.31066	0.280979	0.214379	-2.22176	0.557834	1
98079680	0.795822	1.31066	0.280979	0.214379	-2.22176	0.455174	1
98009534	1.5911	2.62024	0.561958	0.214468	-2.22116	0.290959	1
98031228	2.50999	4.13254	0.887448	0.214746	-2.21929	0.175765	1
98006341	2.37872	3.91451	0.842937	0.215337	-2.21533	0.166725	1
98015836	1.80104	2.96368	0.6384	0.215408	-2.21486	0.184149	1
98004594	0.83432	1.37282	0.295816	0.21548	-2.21437	0.584806	1
98006837	0.83432	1.37282	0.295816	0.21548	-2.21437	0.41753	1
98026859	0.83432	1.37282	0.295816	0.21548	-2.21437	0.510013	1
98030308	0.83432	1.37282	0.295816	0.21548	-2.21437	0.42145	1
98042367	0.83432	1.37282	0.295816	0.21548	-2.21437	0.584806	1
98052033	0.83432	1.37282	0.295816	0.21548	-2.21437	0.400419	1
98057896	0.83432	1.37282	0.295816	0.21548	-2.21437	0.483545	1
98058676	0.83432	1.37282	0.295816	0.21548	-2.21437	0.533493	1
98063502	0.83432	1.37282	0.295816	0.21548	-2.21437	0.554517	1
98067750	0.83432	1.37282	0.295816	0.21548	-2.21437	0.500665	1
98075483	0.83432	1.37282	0.295816	0.21548	-2.21437	0.449915	1
98076863	0.83432	1.37282	0.295816	0.21548	-2.21437	0.4097	1
98061045	2.63451	4.3348	0.934216	0.215516	-2.21414	0.367825	1
98071603	1.83954	3.02584	0.653237	0.215886	-2.21166	0.193105	1
98001061	3.20539	5.27203	1.13875	0.215999	-2.2109	0.170181	1
98019082	3.84998	6.33187	1.36808	0.216062	-2.21048	0.0487125	1
98034007	2.01129	3.30774	0.714842	0.216112	-2.21015	0.306555	1
98019906	2.37138	3.89982	0.842937	0.216148	-2.20991	0.153047	1
98004783	1.00522	1.65302	0.357421	0.216224	-2.2094	0.507768	1
98009078	1.00522	1.65302	0.357421	0.216224	-2.2094	0.474961	1
98011851	1.00522	1.65302	0.357421	0.216224	-2.2094	0.457637	1
98015269	1.00522	1.65302	0.357421	0.216224	-2.2094	0.458766	1
98016627	1.00522	1.65302	0.357421	0.216224	-2.2094	0.444589	1
98018112	1.00522	1.65302	0.357421	0.216224	-2.2094	0.442807	1
98018901	1.00522	1.65302	0.357421	0.216224	-2.2094	0.500721	1
98038355	1.00522	1.65302	0.357421	0.216224	-2.2094	0.538084	1
98052716	1.00522	1.65302	0.357421	0.216224	-2.2094	0.427714	1
98058204	1.00522	1.65302	0.357421	0.216224	-2.2094	0.563376	1
98063708	1.00522	1.65302	0.357421	0.216224	-2.2094	0.404141	1
98065363	1.00522	1.65302	0.357421	0.216224	-2.2094	0.537713	1
98071662	1.00522	1.65302	0.357421	0.216224	-2.2094	0.489384	1
98073685	1.00522	1.65302	0.357421	0.216224	-2.2094	0.49923	1
98078476	1.00522	1.65302	0.357421	0.216224	-2.2094	0.4302	1
98056030	1.62194	2.66709	0.576795	0.216264	-2.20914	0.329821	1
98013498	2.79892	4.60201	0.995822	0.216388	-2.20831	0.35279	1
98002281	1.7937	2.949	0.6384	0.216481	-2.20769	0.291964	1
98027032	2.61982	4.30543	0.934216	0.216986	-2.20433	0.133449	1
98042421	3.19071	5.24266	1.13875	0.217209	-2.20284	0.593192	1
98070178	2.40223	3.94668	0.857774	0.217341	-2.20197	0.27903	1
98052281	1.6146	2.65241	0.576795	0.217461	-2.20117	0.415741	1
98005353	1.61375	2.6507	0.576795	0.217601	-2.20024	0.462893	1
98076041	2.61248	4.29074	0.934216	0.217729	-2.1994	0.230904	1
98027571	3.64885	5.99123	1.30647	0.218064	-2.19717	0.219931	1
98005181	0.826123	1.35643	0.295816	0.218084	-2.19704	0.624786	1
98014921	0.826123	1.35643	0.295816	0.218084	-2.19704	0.70564	1
98017474	0.826123	1.35643	0.295816	0.218084	-2.19704	0.675461	1
98044969	0.826123	1.35643	0.295816	0.218084	-2.19704	0.706059	1
98047387	0.826123	1.35643	0.295816	0.218084	-2.19704	0.639489	1
98067632	0.826123	1.35643	0.295816	0.218084	-2.19704	0.675012	1
98071367	0.826123	1.35643	0.295816	0.218084	-2.19704	0.670506	1
98006941	4.04713	6.64485	1.44941	0.218125	-2.19678	0.0680141	1
98033637	4.21888	6.92675	1.51101	0.218141	-2.19666	0.229591	1
98035373	2.39488	3.93199	0.857774	0.218153	-2.19659	0.518507	1
98004063	0.997876	1.63833	0.357421	0.218162	-2.19653	0.400121	1
98004916	0.997876	1.63833	0.357421	0.218162	-2.19653	0.534613	1
98014600	1.99575	3.27666	0.714842	0.218162	-2.19653	0.454848	1
98029981	0.997876	1.63833	0.357421	0.218162	-2.19653	0.503381	1
98030721	0.997876	1.63833	0.357421	0.218162	-2.19653	0.320908	1
98032469	1.99575	3.27666	0.714842	0.218162	-2.19653	0.425591	1
98043518	0.997876	1.63833	0.357421	0.218162	-2.19653	0.341229	1
98054288	0.997876	1.63833	0.357421	0.218162	-2.19653	0.52925	1
98067377	0.997876	1.63833	0.357421	0.218162	-2.19653	0.557099	1
98068739	1.99575	3.27666	0.714842	0.218162	-2.19653	0.224985	1
98076957	1.99575	3.27666	0.714842	0.218162	-2.19653	0.0878691	1
98077630	0.997876	1.63833	0.357421	0.218162	-2.19653	0.516047	1
98079256	0.997876	1.63833	0.357421	0.218162	-2.19653	0.346606	1
98028947	12.4216	20.3865	4.45659	0.218605	-2.1936	0.0071075	1
98014674	1.6064	2.63601	0.576795	0.218813	-2.19223	0.245072	1
98018930	1.6064	2.63601	0.576795	0.218813	-2.19223	0.266509	1
98030528	1.6064	2.63601	0.576795	0.218813	-2.19223	0.250087	1
98047908	1.6064	2.63601	0.576795	0.218813	-2.19223	0.250588	1
98013887	3.9535	6.48727	1.41973	0.218849	-2.19199	0.107756	1
98068236	1.77761	2.91683	0.6384	0.218868	-2.19187	0.17929	1
98040602	14.7786	24.2473	5.30985	0.218987	-2.19108	0.448783	1
98053359	1.6449	2.69817	0.591632	0.219271	-2.18921	0.223624	1
98071116	1.6449	2.69817	0.591632	0.219271	-2.18921	0.287691	1
98048067	3.41572	5.6014	1.23003	0.219594	-2.18709	0.239726	1
98054171	2.3403	3.83766	0.842937	0.219649	-2.18673	0.232462	1
98074043	1.56002	2.55808	0.561958	0.21968	-2.18653	0.194431	1
98001699	1.59906	2.62133	0.576795	0.220039	-2.18417	0.557316	1
98050628	1.59906	2.62133	0.576795	0.220039	-2.18417	0.413389	1
98052368	1.59906	2.62133	0.576795	0.220039	-2.18417	0.506683	1
98057453	2.75995	4.52408	0.995822	0.220116	-2.18366	0.0598976	1
98075717	3.93117	6.4426	1.41973	0.220366	-2.18202	0.111173	1
98074713	1.80846	2.96368	0.653237	0.220414	-2.18171	0.355896	1
98043681	4.43515	7.26802	1.60229	0.220458	-2.18143	0.0397352	1
98002656	0.81878	1.34174	0.295816	0.220471	-2.18134	0.495877	1
98029147	0.81878	1.34174	0.295816	0.220471	-2.18134	0.520722	1
98029713	0.81878	1.34174	0.295816	0.220471	-2.18134	0.507799	1
98032887	0.81878	1.34174	0.295816	0.220471	-2.18134	0.538624	1
98047971	0.81878	1.34174	0.295816	0.220471	-2.18134	0.555384	1
98048493	0.81878	1.34174	0.295816	0.220471	-2.18134	0.54696	1
98057053	0.81878	1.34174	0.295816	0.220471	-2.18134	0.529919	1
98069388	0.81878	1.34174	0.295816	0.220471	-2.18134	0.462761	1
98072217	0.81878	1.34174	0.295816	0.220471	-2.18134	0.460574	1
98075136	0.81878	1.34174	0.295816	0.220471	-2.18134	0.447886	1
98076980	0.81878	1.34174	0.295816	0.220471	-2.18134	0.511437	1
98077121	0.81878	1.34174	0.295816	0.220471	-2.18134	0.456348	1
98078700	0.81878	1.34174	0.295816	0.220471	-2.18134	0.509396	1
98078770	0.81878	1.34174	0.295816	0.220471	-2.18134	0.394594	1
98078856	3.52415	5.77149	1.2768	0.221225	-2.17641	0.0732253	1
98034492	4.21076	6.89567	1.52585	0.221276	-2.17608	0.121382	1
98017857	2.4476	4.00775	0.887448	0.221433	-2.17506	0.385666	1
98015140	2.61115	4.27326	0.949053	0.222091	-2.17077	0.138425	1
98067672	6.08181	9.9526	2.21102	0.222155	-2.17036	0.245455	1
98037834	1.54448	2.527	0.561958	0.222382	-2.16889	0.307221	1
98072312	1.54448	2.527	0.561958	0.222382	-2.16889	0.342024	1
98008711	5.05277	8.26679	1.83876	0.222427	-2.16859	0.0379875	1
98054765	1.75388	2.86935	0.6384	0.222489	-2.16819	0.262245	1
98048702	427.636	699.576	155.696	0.222557	-2.16775	0.23772	1
98011668	2.56531	4.19641	0.934216	0.222623	-2.16733	0.168236	1
98056986	5.55241	9.07861	2.0262	0.223184	-2.16369	0.0688265	1
98007900	0.810583	1.32535	0.295816	0.223198	-2.1636	0.684651	1
98008152	0.810583	1.32535	0.295816	0.223198	-2.1636	0.703606	1
98009404	0.810583	1.32535	0.295816	0.223198	-2.1636	0.585853	1
98013684	0.810583	1.32535	0.295816	0.223198	-2.1636	0.689725	1
98014832	0.810583	1.32535	0.295816	0.223198	-2.1636	0.662336	1
98017224	0.810583	1.32535	0.295816	0.223198	-2.1636	0.619874	1
98022652	0.810583	1.32535	0.295816	0.223198	-2.1636	0.685375	1
98023887	0.810583	1.32535	0.295816	0.223198	-2.1636	0.672246	1
98026970	0.810583	1.32535	0.295816	0.223198	-2.1636	0.705087	1
98030604	0.810583	1.32535	0.295816	0.223198	-2.1636	0.703606	1
98032266	0.810583	1.32535	0.295816	0.223198	-2.1636	0.629733	1
98033795	0.810583	1.32535	0.295816	0.223198	-2.1636	0.611511	1
98034678	0.810583	1.32535	0.295816	0.223198	-2.1636	0.687755	1
98044762	0.810583	1.32535	0.295816	0.223198	-2.1636	0.632672	1
98049599	1.62117	2.6507	0.591632	0.223198	-2.1636	0.538999	1
98063714	0.810583	1.32535	0.295816	0.223198	-2.1636	0.647466	1
98066363	0.810583	1.32535	0.295816	0.223198	-2.1636	0.675552	1
98066851	0.810583	1.32535	0.295816	0.223198	-2.1636	0.698729	1
98067958	0.810583	1.32535	0.295816	0.223198	-2.1636	0.703606	1
98069009	0.810583	1.32535	0.295816	0.223198	-2.1636	0.599689	1
98071339	0.810583	1.32535	0.295816	0.223198	-2.1636	0.644987	1
98075940	0.810583	1.32535	0.295816	0.223198	-2.1636	0.67563	1
98078262	0.810583	1.32535	0.295816	0.223198	-2.1636	0.604874	1
98078540	0.810583	1.32535	0.295816	0.223198	-2.1636	0.610196	1
98051503	2.51862	4.11785	0.919379	0.223267	-2.16316	0.241036	1
98035772	3.8455	6.28611	1.4049	0.223492	-2.1617	0.110013	1
98029944	1.74653	2.85467	0.6384	0.223634	-2.16079	0.255891	1
98004743	3.28281	5.36527	1.20036	0.223728	-2.16019	0.0869848	1
98072753	1.53628	2.5106	0.561958	0.223834	-2.1595	0.480126	1
98072813	1.53628	2.5106	0.561958	0.223834	-2.1595	0.336512	1
98015806	3.11246	5.08617	1.13875	0.223892	-2.15912	0.454123	1
98047776	2.51127	4.10317	0.919379	0.224066	-2.15801	0.353848	1
98056436	2.75917	4.50768	1.01066	0.224208	-2.15709	0.121643	1
98071836	1.61382	2.63601	0.591632	0.224442	-2.15559	0.311474	1
98050474	2.33952	3.82127	0.857774	0.224474	-2.15538	0.205038	1
98061954	4.07871	6.66125	1.49617	0.224609	-2.15451	0.0985504	1
98017426	2.41706	3.94668	0.887448	0.22486	-2.1529	0.384322	1
98011975	4.1554	6.78495	1.52585	0.224887	-2.15273	0.0329441	1
98022562	1.52894	2.49592	0.561958	0.225151	-2.15104	0.278893	1
98023750	1.52894	2.49592	0.561958	0.225151	-2.15104	0.349955	1
98054866	1.52894	2.49592	0.561958	0.225151	-2.15104	0.232469	1
98071666	1.52894	2.49592	0.561958	0.225151	-2.15104	0.363925	1
98002285	5.08346	8.29849	1.86843	0.225153	-2.15102	0.0213676	1
98067221	1.52808	2.49421	0.561958	0.225305	-2.15005	0.712298	1
98029058	2.33132	3.80487	0.857774	0.225441	-2.14918	0.294422	1
98056822	2.33132	3.80487	0.857774	0.225441	-2.14918	0.202473	1
98041221	1.56744	2.55808	0.576795	0.22548	-2.14893	0.227794	1
98042971	1.56744	2.55808	0.576795	0.22548	-2.14893	0.240131	1
98019843	172.462	281.436	63.489	0.22559	-2.14823	0.163711	1
98001819	0.80324	1.31066	0.295816	0.225699	-2.14753	0.681046	1
98002397	0.80324	1.31066	0.295816	0.225699	-2.14753	0.469603	1
98004848	0.80324	1.31066	0.295816	0.225699	-2.14753	0.57185	1
98006915	0.80324	1.31066	0.295816	0.225699	-2.14753	0.736234	1
98010583	0.80324	1.31066	0.295816	0.225699	-2.14753	0.413015	1
98010925	0.80324	1.31066	0.295816	0.225699	-2.14753	0.421029	1
98012139	0.80324	1.31066	0.295816	0.225699	-2.14753	0.580024	1
98012507	0.80324	1.31066	0.295816	0.225699	-2.14753	0.672208	1
98013701	0.80324	1.31066	0.295816	0.225699	-2.14753	0.449275	1
98014508	0.80324	1.31066	0.295816	0.225699	-2.14753	0.672208	1
98014711	0.80324	1.31066	0.295816	0.225699	-2.14753	0.680035	1
98015933	0.80324	1.31066	0.295816	0.225699	-2.14753	0.540815	1
98016516	0.80324	1.31066	0.295816	0.225699	-2.14753	0.494311	1
98017299	0.80324	1.31066	0.295816	0.225699	-2.14753	0.630094	1
98017330	0.80324	1.31066	0.295816	0.225699	-2.14753	0.682529	1
98020174	0.80324	1.31066	0.295816	0.225699	-2.14753	0.672208	1
98023008	0.80324	1.31066	0.295816	0.225699	-2.14753	0.672208	1
98024701	0.80324	1.31066	0.295816	0.225699	-2.14753	0.599797	1
98024976	0.80324	1.31066	0.295816	0.225699	-2.14753	0.563134	1
98026628	0.80324	1.31066	0.295816	0.225699	-2.14753	0.681046	1
98027371	0.80324	1.31066	0.295816	0.225699	-2.14753	0.566029	1
98027745	0.80324	1.31066	0.295816	0.225699	-2.14753	0.448758	1
98028933	0.80324	1.31066	0.295816	0.225699	-2.14753	0.529258	1
98029454	0.80324	1.31066	0.295816	0.225699	-2.14753	0.609688	1
98033929	0.80324	1.31066	0.295816	0.225699	-2.14753	0.736234	1
98039101	0.80324	1.31066	0.295816	0.225699	-2.14753	0.610719	1
98040630	0.80324	1.31066	0.295816	0.225699	-2.14753	0.645612	1
98041671	0.80324	1.31066	0.295816	0.225699	-2.14753	0.673313	1
98043318	0.80324	1.31066	0.295816	0.225699	-2.14753	0.632244	1
98044774	0.80324	1.31066	0.295816	0.225699	-2.14753	0.489572	1
98045776	0.80324	1.31066	0.295816	0.225699	-2.14753	0.487961	1
98048745	0.80324	1.31066	0.295816	0.225699	-2.14753	0.489488	1
98050620	0.80324	1.31066	0.295816	0.225699	-2.14753	0.437194	1
98051027	0.80324	1.31066	0.295816	0.225699	-2.14753	0.559709	1
98054712	0.80324	1.31066	0.295816	0.225699	-2.14753	0.529246	1
98058828	0.80324	1.31066	0.295816	0.225699	-2.14753	0.736234	1
98060216	0.80324	1.31066	0.295816	0.225699	-2.14753	0.497058	1
98060761	0.80324	1.31066	0.295816	0.225699	-2.14753	0.54612	1
98061776	0.80324	1.31066	0.295816	0.225699	-2.14753	0.672208	1
98062044	0.80324	1.31066	0.295816	0.225699	-2.14753	0.620778	1
98062055	0.80324	1.31066	0.295816	0.225699	-2.14753	0.514353	1
98062117	0.80324	1.31066	0.295816	0.225699	-2.14753	0.44475	1
98065348	0.80324	1.31066	0.295816	0.225699	-2.14753	0.526765	1
98066136	0.80324	1.31066	0.295816	0.225699	-2.14753	0.64595	1
98066457	0.80324	1.31066	0.295816	0.225699	-2.14753	0.736234	1
98067721	0.80324	1.31066	0.295816	0.225699	-2.14753	0.681046	1
98068860	0.80324	1.31066	0.295816	0.225699	-2.14753	0.495262	1
98068942	0.80324	1.31066	0.295816	0.225699	-2.14753	0.626406	1
98069100	0.80324	1.31066	0.295816	0.225699	-2.14753	0.545378	1
98071195	0.80324	1.31066	0.295816	0.225699	-2.14753	0.572787	1
98071513	2.40972	3.93199	0.887448	0.225699	-2.14753	0.25647	1
98073917	0.80324	1.31066	0.295816	0.225699	-2.14753	0.509711	1
98074580	0.80324	1.31066	0.295816	0.225699	-2.14753	0.460682	1
98074904	0.80324	1.31066	0.295816	0.225699	-2.14753	0.584464	1
98075398	0.80324	1.31066	0.295816	0.225699	-2.14753	0.51791	1
98078936	1.60648	2.62133	0.591632	0.225699	-2.14753	0.469011	1
98027595	2.53423	4.13425	0.934216	0.22597	-2.1458	0.206214	1
98071879	8.77889	14.3213	3.23651	0.225993	-2.14565	0.159898	1
98024873	1.73099	2.82359	0.6384	0.226096	-2.14499	0.250786	1
98029751	1.73099	2.82359	0.6384	0.226096	-2.14499	0.201849	1
98010132	19.1335	31.2023	7.06466	0.226414	-2.14296	0.163857	1
98040623	3.04234	4.96076	1.12392	0.226561	-2.14203	0.194974	1
98000713	1.52074	2.47952	0.561958	0.22664	-2.14153	0.447738	1
98013987	1.52074	2.47952	0.561958	0.22664	-2.14153	0.384876	1
98025687	1.52074	2.47952	0.561958	0.22664	-2.14153	0.331175	1
98061569	1.52074	2.47952	0.561958	0.22664	-2.14153	0.481257	1
98057644	2.52604	4.11785	0.934216	0.22687	-2.14006	0.133323	1
98038739	2.72809	4.44552	1.01066	0.227343	-2.13706	0.229908	1
98057038	4.06974	6.62846	1.51101	0.227958	-2.13316	0.0751678	1
98013656	1.5134	2.46484	0.561958	0.22799	-2.13296	0.510721	1
98015601	1.5134	2.46484	0.561958	0.22799	-2.13296	0.32379	1
98030825	1.5134	2.46484	0.561958	0.22799	-2.13296	0.32827	1
98079276	1.5134	2.46484	0.561958	0.22799	-2.13296	0.580281	1
98006939	1.92485	3.13486	0.714842	0.22803	-2.1327	0.232779	1
98017847	1.5519	2.527	0.576795	0.228253	-2.13129	0.347346	1
98074837	1.5519	2.527	0.576795	0.228253	-2.13129	0.334632	1
98075154	4.65538	7.58038	1.73039	0.228272	-2.13118	0.0869544	1
98031328	1.5904	2.58916	0.591632	0.228504	-2.12971	0.337508	1
98058057	1.75395	2.85467	0.653237	0.228832	-2.12764	0.231486	1
98051522	4.85009	7.89336	1.80683	0.228905	-2.12718	0.155756	1
98026353	3.25946	5.30373	1.2152	0.229121	-2.12582	0.0755134	1
98054359	6.55766	10.6701	2.44523	0.229167	-2.12553	0.0341702	1
98032375	3.33669	5.42852	1.24487	0.22932	-2.12456	0.260542	1
98004866	2.3781	3.86874	0.887448	0.229389	-2.12413	0.16707	1
98009300	1.50551	2.44906	0.561958	0.229458	-2.1237	0.231805	1
98012732	3.25181	5.28842	1.2152	0.229784	-2.12165	0.212551	1
98023880	15.6658	25.4772	5.85435	0.229787	-2.12163	0.150952	1
98074333	3.8669	6.2844	1.44941	0.230636	-2.11631	0.131174	1
98011930	0.748657	1.21633	0.280979	0.231005	-2.11401	0.66158	1
98012643	0.748657	1.21633	0.280979	0.231005	-2.11401	0.676666	1
98014216	1.49731	2.43267	0.561958	0.231005	-2.11401	0.43661	1
98018886	0.748657	1.21633	0.280979	0.231005	-2.11401	0.640897	1
98027723	0.748657	1.21633	0.280979	0.231005	-2.11401	0.681845	1
98033951	0.748657	1.21633	0.280979	0.231005	-2.11401	0.623175	1
98043912	0.748657	1.21633	0.280979	0.231005	-2.11401	0.689323	1
98052513	0.748657	1.21633	0.280979	0.231005	-2.11401	0.706299	1
98056955	0.748657	1.21633	0.280979	0.231005	-2.11401	0.652079	1
98057359	0.748657	1.21633	0.280979	0.231005	-2.11401	0.693898	1
98065144	0.748657	1.21633	0.280979	0.231005	-2.11401	0.688006	1
98023526	1.53636	2.49592	0.576795	0.231095	-2.11344	0.244245	1
98036996	1.53636	2.49592	0.576795	0.231095	-2.11344	0.282846	1
98070432	1.73841	2.82359	0.653237	0.23135	-2.11185	0.245188	1
98012764	0.950711	1.544	0.357421	0.23149	-2.11098	0.477368	1
98023058	0.950711	1.544	0.357421	0.23149	-2.11098	0.397823	1
98040067	0.950711	1.544	0.357421	0.23149	-2.11098	0.524485	1
98045458	0.950711	1.544	0.357421	0.23149	-2.11098	0.408315	1
98065175	0.950711	1.544	0.357421	0.23149	-2.11098	0.504918	1
98075292	0.950711	1.544	0.357421	0.23149	-2.11098	0.395203	1
98007416	6.2612	10.1684	2.35395	0.231495	-2.11094	0.0260349	1
98015282	2.27767	3.69757	0.857774	0.231983	-2.10791	0.135144	1
98063416	2.44037	3.96136	0.919379	0.232087	-2.10727	0.173439	1
98071539	5.49669	8.92041	2.07297	0.232385	-2.10541	0.0450297	1
98028832	1.48997	2.41798	0.561958	0.232408	-2.10527	0.328324	1
98035922	1.89408	3.07332	0.714842	0.232596	-2.1041	0.183251	1
98010624	1.52816	2.47952	0.576795	0.232623	-2.10393	0.364582	1
98058107	1.52816	2.47952	0.576795	0.232623	-2.10393	0.338917	1
98019340	1.73021	2.80719	0.653237	0.232701	-2.10345	0.371058	1
98058695	1.73021	2.80719	0.653237	0.232701	-2.10345	0.282252	1
98064524	3.72095	6.037	1.4049	0.232714	-2.10337	0.129726	1
98009333	1.56666	2.54168	0.591632	0.232772	-2.10301	0.391405	1
98064721	1.56666	2.54168	0.591632	0.232772	-2.10301	0.419927	1
98044334	2.23098	3.61901	0.842937	0.232919	-2.1021	0.178925	1
98077615	2.26947	3.68117	0.857774	0.233017	-2.1015	0.180702	1
98040802	2.34702	3.80658	0.887448	0.233135	-2.10076	0.326801	1
98023960	1.72287	2.7925	0.653237	0.233925	-2.09588	0.316506	1
98077014	1.52082	2.46484	0.576795	0.234009	-2.09536	0.291781	1
98053669	3.93776	6.37935	1.49617	0.234534	-2.09213	0.0834629	1
98001340	2.45599	3.97776	0.934216	0.23486	-2.09013	0.0946394	1
98053829	2.21489	3.58684	0.842937	0.235008	-2.08922	0.224423	1
98009052	2.29243	3.71225	0.872611	0.235062	-2.08888	0.16534	1
98049066	3.55471	5.75619	1.35324	0.235094	-2.08869	0.176215	1
98054979	3.59321	5.81835	1.36808	0.235132	-2.08846	0.0800454	1
98048910	1.67648	2.71457	0.6384	0.235176	-2.08819	0.2645	1
98073109	3.39116	5.49068	1.29164	0.235242	-2.08778	0.105412	1
98056716	1.67563	2.71286	0.6384	0.235324	-2.08728	0.340493	1
98044706	3.1891	5.16301	1.2152	0.235366	-2.08702	0.0960236	1
98005779	2.98705	4.83535	1.13875	0.235506	-2.08616	0.121899	1
98000437	2.24659	3.63541	0.857774	0.23595	-2.08345	0.350641	1
98016029	2.28424	3.69586	0.872611	0.236105	-2.0825	0.222308	1
98026087	0.935171	1.51292	0.357421	0.236246	-2.08164	0.354741	1
98056529	0.935171	1.51292	0.357421	0.236246	-2.08164	0.431099	1
98060957	0.935171	1.51292	0.357421	0.236246	-2.08164	0.510984	1
98075734	0.935171	1.51292	0.357421	0.236246	-2.08164	0.543835	1
98050857	4.31079	6.97252	1.64906	0.236508	-2.08004	0.166644	1
98064671	4.6398	7.50244	1.77715	0.236877	-2.07779	0.0398739	1
98057869	2.23839	3.61901	0.857774	0.237019	-2.07693	0.143673	1
98000014	1.54378	2.49592	0.591632	0.23704	-2.0768	0.339287	1
98002596	0.733117	1.18525	0.280979	0.237062	-2.07666	0.687681	1
98003514	0.733117	1.18525	0.280979	0.237062	-2.07666	0.682312	1
98004887	0.733117	1.18525	0.280979	0.237062	-2.07666	0.657708	1
98005712	1.46623	2.37051	0.561958	0.237062	-2.07666	0.413503	1
98006561	0.733117	1.18525	0.280979	0.237062	-2.07666	0.676654	1
98013663	0.733117	1.18525	0.280979	0.237062	-2.07666	0.58037	1
98016089	0.733117	1.18525	0.280979	0.237062	-2.07666	0.621104	1
98018205	0.733117	1.18525	0.280979	0.237062	-2.07666	0.622144	1
98022094	0.733117	1.18525	0.280979	0.237062	-2.07666	0.648698	1
98029346	0.733117	1.18525	0.280979	0.237062	-2.07666	0.675767	1
98031245	0.733117	1.18525	0.280979	0.237062	-2.07666	0.637142	1
98032041	0.733117	1.18525	0.280979	0.237062	-2.07666	0.670504	1
98033892	0.733117	1.18525	0.280979	0.237062	-2.07666	0.599114	1
98035282	0.733117	1.18525	0.280979	0.237062	-2.07666	0.64293	1
98036182	0.733117	1.18525	0.280979	0.237062	-2.07666	0.662235	1
98036684	0.733117	1.18525	0.280979	0.237062	-2.07666	0.646079	1
98043330	0.733117	1.18525	0.280979	0.237062	-2.07666	0.676711	1
98045058	0.733117	1.18525	0.280979	0.237062	-2.07666	0.664565	1
98046852	0.733117	1.18525	0.280979	0.237062	-2.07666	0.673748	1
98047613	0.733117	1.18525	0.280979	0.237062	-2.07666	0.67247	1
98047630	0.733117	1.18525	0.280979	0.237062	-2.07666	0.606541	1
98060177	0.733117	1.18525	0.280979	0.237062	-2.07666	0.619642	1
98061577	0.733117	1.18525	0.280979	0.237062	-2.07666	0.660745	1
98062099	0.733117	1.18525	0.280979	0.237062	-2.07666	0.649313	1
98062638	2.19935	3.55576	0.842937	0.237062	-2.07666	0.296745	1
98065751	0.733117	1.18525	0.280979	0.237062	-2.07666	0.629094	1
98071336	0.733117	1.18525	0.280979	0.237062	-2.07666	0.601321	1
98073918	0.733117	1.18525	0.280979	0.237062	-2.07666	0.621219	1
98074786	0.733117	1.18525	0.280979	0.237062	-2.07666	0.670598	1
98044340	2.4716	3.99415	0.949053	0.237611	-2.07333	0.325615	1
98015098	5.67407	9.16905	2.17909	0.237657	-2.07305	0.0444376	1
98057155	1.66094	2.68349	0.6384	0.237899	-2.07158	0.35985	1
98054354	72.4365	116.992	27.8809	0.238315	-2.06906	0.186026	1
98013637	5.97744	9.65259	2.3023	0.238516	-2.06784	0.172501	1
98003133	2.99447	4.83535	1.15359	0.238574	-2.06749	0.155372	1
98004936	1.53558	2.47952	0.591632	0.238607	-2.06729	0.459738	1
98028172	1.53558	2.47952	0.591632	0.238607	-2.06729	0.357455	1
98043276	1.53558	2.47952	0.591632	0.238607	-2.06729	0.446658	1
98064787	1.53558	2.47952	0.591632	0.238607	-2.06729	0.423141	1
98009219	0.926974	1.49653	0.357421	0.238834	-2.06592	0.776603	1
98014106	0.926974	1.49653	0.357421	0.238834	-2.06592	0.726555	1
98025823	0.926974	1.49653	0.357421	0.238834	-2.06592	0.802128	1
98074114	0.926974	1.49653	0.357421	0.238834	-2.06592	0.796949	1
98075632	0.926974	1.49653	0.357421	0.238834	-2.06592	0.77899	1
98079048	0.926974	1.49653	0.357421	0.238834	-2.06592	0.783845	1
98004064	2.94863	4.7585	1.13875	0.239309	-2.06305	0.418881	1
98033383	1.69125	2.72926	0.653237	0.239346	-2.06283	0.306992	1
98008167	1.65275	2.66709	0.6384	0.239362	-2.06274	0.27684	1
98061689	1.65275	2.66709	0.6384	0.239362	-2.06274	0.231503	1
98017938	2.41702	3.89982	0.934216	0.239554	-2.06158	0.110375	1
98000938	1.52824	2.46484	0.591632	0.240029	-2.05872	0.267381	1
98005921	1.52824	2.46484	0.591632	0.240029	-2.05872	0.303926	1
98042591	2.25315	3.6337	0.872611	0.240144	-2.05803	0.204627	1
98015896	2.17647	3.51	0.842937	0.240153	-2.05797	0.179153	1
98013235	1.48919	2.40159	0.576795	0.240172	-2.05786	0.449654	1
98005785	1.45069	2.33943	0.561958	0.240212	-2.05762	0.393367	1
98025176	1.45069	2.33943	0.561958	0.240212	-2.05762	0.453798	1
98044439	1.45069	2.33943	0.561958	0.240212	-2.05762	0.352732	1
98061654	1.45069	2.33943	0.561958	0.240212	-2.05762	0.394958	1
98066750	1.45069	2.33943	0.561958	0.240212	-2.05762	0.366869	1
98071471	1.45069	2.33943	0.561958	0.240212	-2.05762	0.311514	1
98076746	11.7097	18.8792	4.54018	0.240485	-2.05598	0.336053	1
98016703	8.82157	14.2218	3.42133	0.240569	-2.05548	0.227508	1
98029959	3.3675	5.42852	1.30647	0.240669	-2.05488	0.251916	1
98028935	1.64455	2.6507	0.6384	0.240842	-2.05384	0.301698	1
98001933	5.90467	9.517	2.29234	0.240868	-2.05368	0.354224	1
98045175	4.41408	7.11262	1.71555	0.241198	-2.05171	0.353333	1
98002198	0.919631	1.48184	0.357421	0.241201	-2.05169	0.435766	1
98002465	0.919631	1.48184	0.357421	0.241201	-2.05169	0.507191	1
98002742	0.919631	1.48184	0.357421	0.241201	-2.05169	0.487526	1
98003097	0.919631	1.48184	0.357421	0.241201	-2.05169	0.420896	1
98005222	0.919631	1.48184	0.357421	0.241201	-2.05169	0.483319	1
98013200	0.919631	1.48184	0.357421	0.241201	-2.05169	0.484321	1
98014958	0.919631	1.48184	0.357421	0.241201	-2.05169	0.50971	1
98015022	0.919631	1.48184	0.357421	0.241201	-2.05169	0.438965	1
98015214	0.919631	1.48184	0.357421	0.241201	-2.05169	0.431961	1
98015405	0.919631	1.48184	0.357421	0.241201	-2.05169	0.523166	1
98016426	0.919631	1.48184	0.357421	0.241201	-2.05169	0.470448	1
98016880	0.919631	1.48184	0.357421	0.241201	-2.05169	0.492358	1
98018812	0.919631	1.48184	0.357421	0.241201	-2.05169	0.418034	1
98019298	0.919631	1.48184	0.357421	0.241201	-2.05169	0.522825	1
98019696	0.919631	1.48184	0.357421	0.241201	-2.05169	0.526835	1
98021571	0.919631	1.48184	0.357421	0.241201	-2.05169	0.37705	1
98033898	0.919631	1.48184	0.357421	0.241201	-2.05169	0.522305	1
98041083	0.919631	1.48184	0.357421	0.241201	-2.05169	0.509036	1
98043907	0.919631	1.48184	0.357421	0.241201	-2.05169	0.482716	1
98043911	0.919631	1.48184	0.357421	0.241201	-2.05169	0.453904	1
98048797	0.919631	1.48184	0.357421	0.241201	-2.05169	0.467355	1
98051176	0.919631	1.48184	0.357421	0.241201	-2.05169	0.545663	1
98052120	0.919631	1.48184	0.357421	0.241201	-2.05169	0.465865	1
98058659	0.919631	1.48184	0.357421	0.241201	-2.05169	0.48489	1
98058937	0.919631	1.48184	0.357421	0.241201	-2.05169	0.443783	1
98061049	0.919631	1.48184	0.357421	0.241201	-2.05169	0.550407	1
98061717	0.919631	1.48184	0.357421	0.241201	-2.05169	0.538143	1
98062738	0.919631	1.48184	0.357421	0.241201	-2.05169	0.396706	1
98063133	0.919631	1.48184	0.357421	0.241201	-2.05169	0.573567	1
98064988	0.919631	1.48184	0.357421	0.241201	-2.05169	0.468992	1
98070858	0.919631	1.48184	0.357421	0.241201	-2.05169	0.459972	1
98077907	0.919631	1.48184	0.357421	0.241201	-2.05169	0.52624	1
98028565	4.00753	6.45728	1.55778	0.241244	-2.05144	0.0640273	1
98020598	4.72596	7.61317	1.83876	0.241524	-2.04976	0.101676	1
98006638	2.36213	3.80487	0.919379	0.241632	-2.04912	0.314627	1
98019321	2.96339	4.77319	1.15359	0.241681	-2.04882	0.193726	1
98072056	1.4425	2.32303	0.561958	0.241907	-2.04748	0.714814	1
98019205	3.72032	5.99123	1.44941	0.241921	-2.04739	0.247004	1
98041673	1.63721	2.63601	0.6384	0.242184	-2.04583	0.280339	1
98053622	1.63721	2.63601	0.6384	0.242184	-2.04583	0.327687	1
98059335	1.63721	2.63601	0.6384	0.242184	-2.04583	0.28678	1
98026473	1.83192	2.949	0.714842	0.242402	-2.04453	0.340608	1
98013421	2.95605	4.7585	1.15359	0.242427	-2.04438	0.211703	1
98001258	0.756075	1.21633	0.295816	0.243203	-2.03977	0.655511	1
98034847	0.756075	1.21633	0.295816	0.243203	-2.03977	0.657789	1
98035107	0.756075	1.21633	0.295816	0.243203	-2.03977	0.632435	1
98037947	0.756075	1.21633	0.295816	0.243203	-2.03977	0.663043	1
98049491	0.756075	1.21633	0.295816	0.243203	-2.03977	0.646097	1
98056439	0.756075	1.21633	0.295816	0.243203	-2.03977	0.610117	1
98061867	0.756075	1.21633	0.295816	0.243203	-2.03977	0.612437	1
98069609	2.22973	3.58684	0.872611	0.243281	-2.0393	0.245012	1
98005000	1.47365	2.37051	0.576795	0.243321	-2.03907	0.273236	1
98060598	1.47365	2.37051	0.576795	0.243321	-2.03907	0.469826	1
98053565	2.19123	3.52468	0.857774	0.243362	-2.03882	0.250806	1
98024220	1.66836	2.68349	0.653237	0.243428	-2.03843	0.357017	1
98048541	1.66836	2.68349	0.653237	0.243428	-2.03843	0.259791	1
98048807	2.38594	3.83766	0.934216	0.243434	-2.0384	0.241325	1
98001226	0.717577	1.15417	0.280979	0.243446	-2.03833	0.661696	1
98004932	0.717577	1.15417	0.280979	0.243446	-2.03833	0.691913	1
98007764	0.717577	1.15417	0.280979	0.243446	-2.03833	0.659068	1
98009395	0.717577	1.15417	0.280979	0.243446	-2.03833	0.686025	1
98014909	0.717577	1.15417	0.280979	0.243446	-2.03833	0.690047	1
98015531	0.717577	1.15417	0.280979	0.243446	-2.03833	0.663471	1
98016622	0.717577	1.15417	0.280979	0.243446	-2.03833	0.689147	1
98018600	0.717577	1.15417	0.280979	0.243446	-2.03833	0.674565	1
98019797	0.717577	1.15417	0.280979	0.243446	-2.03833	0.708126	1
98020416	0.717577	1.15417	0.280979	0.243446	-2.03833	0.690047	1
98024197	0.717577	1.15417	0.280979	0.243446	-2.03833	0.671405	1
98024333	0.717577	1.15417	0.280979	0.243446	-2.03833	0.611682	1
98026084	0.717577	1.15417	0.280979	0.243446	-2.03833	0.619838	1
98027453	0.717577	1.15417	0.280979	0.243446	-2.03833	0.631433	1
98027944	0.717577	1.15417	0.280979	0.243446	-2.03833	0.611878	1
98028893	0.717577	1.15417	0.280979	0.243446	-2.03833	0.655691	1
98031313	0.717577	1.15417	0.280979	0.243446	-2.03833	0.673029	1
98033390	0.717577	1.15417	0.280979	0.243446	-2.03833	0.677349	1
98033764	0.717577	1.15417	0.280979	0.243446	-2.03833	0.712252	1
98034106	0.717577	1.15417	0.280979	0.243446	-2.03833	0.667112	1
98034396	0.717577	1.15417	0.280979	0.243446	-2.03833	0.661612	1
98034656	0.717577	1.15417	0.280979	0.243446	-2.03833	0.653726	1
98035004	1.43515	2.30835	0.561958	0.243446	-2.03833	0.437043	1
98035955	0.717577	1.15417	0.280979	0.243446	-2.03833	0.666955	1
98036069	0.717577	1.15417	0.280979	0.243446	-2.03833	0.611154	1
98036680	0.717577	1.15417	0.280979	0.243446	-2.03833	0.667112	1
98037540	0.717577	1.15417	0.280979	0.243446	-2.03833	0.653384	1
98037950	0.717577	1.15417	0.280979	0.243446	-2.03833	0.674778	1
98038822	1.43515	2.30835	0.561958	0.243446	-2.03833	0.370405	1
98038939	0.717577	1.15417	0.280979	0.243446	-2.03833	0.691306	1
98042808	1.43515	2.30835	0.561958	0.243446	-2.03833	0.370232	1
98042923	0.717577	1.15417	0.280979	0.243446	-2.03833	0.677086	1
98044540	0.717577	1.15417	0.280979	0.243446	-2.03833	0.656838	1
98045952	0.717577	1.15417	0.280979	0.243446	-2.03833	0.608494	1
98047016	0.717577	1.15417	0.280979	0.243446	-2.03833	0.665127	1
98047069	0.717577	1.15417	0.280979	0.243446	-2.03833	0.651293	1
98047250	0.717577	1.15417	0.280979	0.243446	-2.03833	0.640504	1
98047453	0.717577	1.15417	0.280979	0.243446	-2.03833	0.690047	1
98047928	0.717577	1.15417	0.280979	0.243446	-2.03833	0.641143	1
98048298	0.717577	1.15417	0.280979	0.243446	-2.03833	0.702691	1
98048582	0.717577	1.15417	0.280979	0.243446	-2.03833	0.695249	1
98048867	0.717577	1.15417	0.280979	0.243446	-2.03833	0.708126	1
98049620	1.43515	2.30835	0.561958	0.243446	-2.03833	0.391132	1
98050399	0.717577	1.15417	0.280979	0.243446	-2.03833	0.659015	1
98050985	0.717577	1.15417	0.280979	0.243446	-2.03833	0.691374	1
98053191	0.717577	1.15417	0.280979	0.243446	-2.03833	0.688394	1
98054455	0.717577	1.15417	0.280979	0.243446	-2.03833	0.642642	1
98055920	0.717577	1.15417	0.280979	0.243446	-2.03833	0.592322	1
98056185	0.717577	1.15417	0.280979	0.243446	-2.03833	0.678307	1
98056487	0.717577	1.15417	0.280979	0.243446	-2.03833	0.638339	1
98057620	0.717577	1.15417	0.280979	0.243446	-2.03833	0.64781	1
98058551	0.717577	1.15417	0.280979	0.243446	-2.03833	0.667314	1
98060510	0.717577	1.15417	0.280979	0.243446	-2.03833	0.644237	1
98060558	0.717577	1.15417	0.280979	0.243446	-2.03833	0.607473	1
98061562	0.717577	1.15417	0.280979	0.243446	-2.03833	0.602344	1
98062963	1.43515	2.30835	0.561958	0.243446	-2.03833	0.463017	1
98065643	0.717577	1.15417	0.280979	0.243446	-2.03833	0.653043	1
98067176	0.717577	1.15417	0.280979	0.243446	-2.03833	0.60152	1
98069724	0.717577	1.15417	0.280979	0.243446	-2.03833	0.625351	1
98069791	0.717577	1.15417	0.280979	0.243446	-2.03833	0.654884	1
98070580	0.717577	1.15417	0.280979	0.243446	-2.03833	0.668588	1
98070933	0.717577	1.15417	0.280979	0.243446	-2.03833	0.671028	1
98070947	0.717577	1.15417	0.280979	0.243446	-2.03833	0.712711	1
98071522	0.717577	1.15417	0.280979	0.243446	-2.03833	0.708126	1
98073274	0.717577	1.15417	0.280979	0.243446	-2.03833	0.541249	1
[truncated: 43,300 more rows]

## Sheet: day 7
id	baseMean	baseMeanA	baseMeanB	foldChange	log2FoldChange	pval	padj
98000000	1.13133	1.44969	0.812977	0.560793	-0.834461	0.822693	1
98000002	1.55351	1.69489	1.41213	0.833167	-0.263323	1	1
98000006	0.287591	0	0.575183	Inf	Inf	0.75853	1
98000008	0.442929	0.310676	0.575183	1.85139	0.88861	1	1
98000009	290.675	314.4	266.951	0.849079	-0.236029	0.54519	1
98000011	1263.31	1424.27	1102.36	0.77398	-0.369631	0.307352	1
98000012	2759.54	2769.88	2749.2	0.992535	-0.0108104	0.951733	1
98000013	0.316011	0.344431	0.287591	0.834975	-0.260196	1	1
98000014	0.172216	0.344431	0	0	#NAME?	0.88623	1
98000017	0.98266	1.96532	0	0	#NAME?	0.090849	0.784375
98000018	4621.92	3716.51	5527.33	1.48724	0.572634	0.118426	0.833363
98000020	2.53737	3.21655	1.85818	0.577692	-0.791629	0.836454	1
98000023	281.018	265.453	296.582	1.11727	0.159973	0.665931	1
98000025	2.49039	0.344431	4.63635	13.4609	3.7507	0.0682793	0.740238
98000027	79.4114	58.6911	100.132	1.70608	0.770687	0.0856814	0.775006
98000028	312.735	248.659	376.811	1.51537	0.599671	0.177066	0.912609
98000029	1.13402	1.69286	0.575183	0.33977	-1.55737	0.399189	1
98000030	0.454471	0.621352	0.287591	0.462848	-1.11139	0.855672	1
98000031	0.155338	0.310676	0	0	#NAME?	0.907943	1
98000033	0.327553	0.655107	0	0	#NAME?	0.560868	1
98000034	345.662	380.09	311.234	0.818843	-0.288341	0.468409	1
98000035	1.30948	2.34796	0.270992	0.115416	-3.11509	0.174849	0.91028
98000039	1150.04	1405.11	894.978	0.636944	-0.650761	0.0661457	0.735385
98000041	260.418	200.158	320.678	1.60212	0.679986	0.149756	0.877422
98000044	513.611	404.282	622.94	1.54085	0.623731	0.0835858	0.770129
98000045	179.561	234.879	124.243	0.528965	-0.918755	0.0330106	0.604851
98000050	2.87808	3.03886	2.71729	0.894181	-0.161361	1	1
98000052	388.739	332.601	444.877	1.33757	0.419615	0.311164	1
98000055	0	0	0	NA	NA	NA	NA
98000057	5.80071	4.00261	7.59881	1.89846	0.924833	0.390418	1
98000058	0.225077	0.450154	0	0	#NAME?	0.90985	1
98000061	72.0853	50.3321	93.8384	1.86438	0.898699	0.0386924	0.633798
98000063	9.34465	10.659	8.03028	0.753379	-0.408552	0.708566	1
98000064	113.033	133.405	92.6605	0.69458	-0.525787	0.196239	0.92798
98000065	0.499769	0.999538	0	0	#NAME?	0.340105	1
98000066	0.344431	0.688862	0	0	#NAME?	0.46301	1
98000067	0.606195	0.688862	0.523528	0.75999	-0.395948	1	1
98000068	0.905979	0.965783	0.846175	0.876154	-0.190743	1	1
98000069	151.22	173.599	128.84	0.74217	-0.430178	0.281492	0.995901
98000070	0.86796	0.688862	1.04706	1.51998	0.604052	0.974908	1
98000071	1.32311	2.07104	0.575183	0.277726	-1.84827	0.285935	0.997429
98000073	0.7202	0.655107	0.785293	1.19872	0.2615	1	1
98000074	0.316011	0.344431	0.287591	0.834975	-0.260196	1	1
98000076	0.458436	0.655107	0.261764	0.399575	-1.32346	0.85317	1
98000077	0.397293	0.794586	0	0	#NAME?	0.594615	1
98000078	843.053	933.406	752.699	0.8064	-0.310433	0.35472	1
98000079	650.242	735.651	564.833	0.7678	-0.381197	0.325805	1
98000080	453.231	485.977	420.485	0.865237	-0.208832	0.612728	1
98000083	8.95297	4.42105	13.4849	3.05016	1.60889	0.0437996	0.654156
98000084	586.07	560.304	611.836	1.09197	0.126935	0.758493	1
98000085	147.958	145.072	150.843	1.03978	0.0562741	0.982375	1
98000086	1.19178	0	2.38356	Inf	Inf	0.130757	0.850285
98000087	3.38468	4.52027	2.24908	0.497553	-1.00708	0.298953	1
98000089	5.22514	9.58751	0.862774	0.0899893	-3.4741	0.00411962	0.252099
98000093	0.454471	0.621352	0.287591	0.462848	-1.11139	0.87359	1
98000094	440.29	296.268	584.312	1.97224	0.979837	0.0237159	0.542283
98000095	458.005	347.954	568.056	1.63256	0.707138	0.0895782	0.78251
98000097	544.27	439.768	648.771	1.47526	0.560966	0.114556	0.827763
98000100	3.02	2.79366	3.24634	1.16204	0.216655	0.989161	1
98000101	0.903015	0.688862	1.11717	1.62176	0.697558	0.970063	1
98000102	7211.15	7356.45	7065.85	0.960497	-0.0581466	0.875817	1
98000103	6.60122	10.404	2.79843	0.268976	-1.89445	0.309418	1
98000104	0.344431	0.688862	0	0	#NAME?	0.491268	1
98000105	22.1566	11.0144	33.2988	3.02321	1.59608	0.0342232	0.610754
98000107	0.392646	0	0.785293	Inf	Inf	0.597694	1
98000108	2.20509	2.24224	2.16794	0.966862	-0.0486177	0.984761	1
98000109	1579.89	1676.98	1482.81	0.88421	-0.177539	0.595583	1
98000110	1.96668	3.07058	0.862774	0.280981	-1.83146	0.434163	1
98000111	783.311	801.385	765.237	0.954894	-0.066588	0.863297	1
98000112	1630.34	2391.61	869.075	0.363385	-1.46043	0.0113224	0.40299
98000115	160.759	135.077	186.442	1.38027	0.464949	0.21549	0.943517
98000117	52.2287	33.0005	71.4569	2.16533	1.11458	0.18078	0.914538
98000119	11.2728	13.081	9.46452	0.723533	-0.46687	0.649836	1
98000120	6.62625	9.77208	3.48042	0.356159	-1.48941	0.0705068	0.745142
98000121	0	0	0	NA	NA	NA	NA
98000123	0.713304	1.13902	0.287591	0.252491	-1.9857	0.540801	1
98000124	1.78613	1.93157	1.6407	0.849412	-0.235463	0.887521	1
98000125	6384.03	4827.01	7941.05	1.64513	0.718201	0.0422862	0.647617
98000126	1.7118	2.03729	1.3863	0.680464	-0.555409	0.725958	1
98000127	13.1099	13.9902	12.2295	0.874149	-0.194048	0.842441	1
98000128	0.172216	0.344431	0	0	#NAME?	0.903734	1
98000130	0.978329	1.69489	0.261764	0.154443	-2.69486	0.396638	1
98000133	0.569508	1.13902	0	0	#NAME?	0.334153	1
98000134	230.974	201.834	260.115	1.28876	0.365984	0.301909	1
98000135	1844.5	2063.13	1625.87	0.78806	-0.343622	0.337195	1
98000136	23.0707	18.3015	27.84	1.52119	0.605198	0.268926	0.989223
98000138	1.5637	1.03329	2.09411	2.02664	1.01909	0.599046	1
98000144	204.378	190.613	218.143	1.14443	0.194625	0.583184	1
98000146	8.64031	9.0808	8.19982	0.902985	-0.147227	0.905635	1
98000148	1711.28	1931.97	1490.59	0.771542	-0.374183	0.272331	0.991249
98000149	0.564862	0.344431	0.785293	2.27997	1.18901	0.909092	1
98052234	74.9218	147.652	2.19191	0.0148451	-6.07387	3.84e-25	8.33e-21
98000152	939.189	658.174	1220.2	1.85392	0.890582	0.119142	0.833909
98000153	0.532789	0.794586	0.270992	0.341049	-1.55195	0.885454	1
98000155	0.742063	0.621352	0.862774	1.38854	0.473573	1	1
98000156	61.7601	52.4321	71.0882	1.35581	0.43916	0.30611	1
98000157	2.38774	3.41501	1.36048	0.398381	-1.32778	0.29366	1
98000158	0.406488	0	0.812977	Inf	Inf	0.475665	1
98000160	4.73415	8.31793	1.15037	0.138299	-2.85413	0.00995461	0.383827
98000162	4.65653	4.86471	4.44836	0.914414	-0.12908	0.899571	1
98000163	12.7092	17.648	7.77032	0.440294	-1.18346	0.0584425	0.708479
98000165	16.1579	20.3295	11.9863	0.589605	-0.76218	0.365752	1
98000166	0	0	0	NA	NA	NA	NA
98000167	1.20836	1.58713	0.829576	0.522688	-0.935978	0.584252	1
98000169	3.04023	3.28203	2.79843	0.852653	-0.229969	0.927324	1
98000170	1059.26	993.331	1125.19	1.13274	0.179822	0.633828	1
98000175	437.853	423.234	452.472	1.06908	0.0963749	0.777847	1
98000176	1.06962	1.27646	0.862774	0.675912	-0.565092	0.786024	1
98000177	2.5405	3.93064	1.15037	0.292666	-1.77267	0.118421	0.833363
98000178	603.27	681.801	524.739	0.769637	-0.37775	0.288751	0.998946
98000180	0.310676	0.621352	0	0	#NAME?	0.538698	1
98000184	0.135496	0	0.270992	Inf	Inf	1	1
98000186	187.228	174.889	199.568	1.14111	0.19044	0.525004	1
98000187	99.5612	62.7141	136.408	2.17508	1.12107	0.0411458	0.644223
98000188	42.4824	4.11037	80.8545	19.6709	4.29799	0.00140602	0.142072
98000190	0.442929	0.310676	0.575183	1.85139	0.88861	1	1
98000191	396.465	386.675	406.254	1.05064	0.0712626	0.87936	1
98000192	190.914	123.563	258.266	2.09015	1.06361	0.0889985	0.781265
98000193	62.204	67.7247	56.6833	0.836966	-0.256758	0.625392	1
98000199	1.10958	1.93157	0.287591	0.14889	-2.74768	0.204907	0.935033
98000202	0.59395	0.900309	0.287591	0.319436	-1.6464	0.882204	1
98000203	24.098	22.8868	25.3092	1.10584	0.145144	0.836173	1
98000204	1.52921	0.621352	2.43707	3.92221	1.97167	0.415525	1
98000205	1.03688	1.21098	0.862774	0.712456	-0.489126	1	1
98000207	8.84126	9.79246	7.89006	0.805728	-0.311636	0.655702	1
98000212	10367.5	9605.72	11129.3	1.15861	0.212394	0.581776	1
98000214	1.99067	0.688862	3.29248	4.77959	2.25689	0.18897	0.92178
98000215	45.1727	43.84	46.5053	1.0608	0.0851467	0.883733	1
98000216	1.93113	1.96532	1.89695	0.965209	-0.051086	1	1
98000217	0	0	0	NA	NA	NA	NA
98000218	622.253	645.955	598.552	0.926616	-0.109957	0.704625	1
98000219	0.570126	0.310676	0.829576	2.67023	1.41696	0.874049	1
98000224	1126.89	1197.76	1056.01	0.881658	-0.181709	0.581845	1
98000225	0.78736	0.999538	0.575183	0.575448	-0.797242	0.859183	1
98000227	0.54567	0	1.09134	Inf	Inf	0.408818	1
98000228	13.0324	15.5054	10.5595	0.681023	-0.554225	0.659171	1
98000229	7.07781	10.6143	3.5413	0.333634	-1.58366	0.216085	0.943755
98000233	166.211	188.06	144.363	0.767639	-0.3815	0.316207	1
98000235	7468.55	7230.06	7707.04	1.06597	0.0921701	0.798489	1
98000241	47.8138	58.406	37.2216	0.637291	-0.649977	0.163943	0.896247
98000242	0.225077	0.450154	0	0	#NAME?	0.909348	1
98000243	2.82926	2.6924	2.96612	1.10166	0.139684	1	1
98000244	8.71387	10.5349	6.8928	0.654279	-0.612021	0.41654	1
98000246	627.663	560.604	694.723	1.23924	0.309455	0.41701	1
98000248	1765.91	2036.03	1495.79	0.734657	-0.444858	0.203626	0.934077
98000250	0.327553	0.655107	0	0	#NAME?	0.483888	1
98000251	3.74284	4.76102	2.72466	0.572286	-0.805192	0.509886	1
98000253	89.7858	73.308	106.264	1.44955	0.535605	0.180776	0.914538
98000254	324.593	287.09	362.096	1.26126	0.334868	0.321743	1
98000255	2.27417	1.86609	2.68224	1.43736	0.523418	0.745827	1
98000256	2.85375	1.58917	4.11834	2.5915	1.37379	0.276183	0.993108
98000257	0.482891	0.965783	0	0	#NAME?	0.312245	1
98000260	579.167	423.957	734.377	1.73219	0.792601	0.0318541	0.597759
98000261	2230.58	1713.01	2748.14	1.60428	0.681927	0.0676423	0.739432
98000263	1.32121	0.655107	1.98731	3.03357	1.60102	0.549581	1
98000265	0.225077	0.450154	0	0	#NAME?	0.892137	1
98000266	107.107	119.334	94.8804	0.795082	-0.330824	0.406371	1
98000267	8.96509	10.6301	7.30008	0.686736	-0.542172	0.574828	1
98000270	0.380415	0.76083	0	0	#NAME?	0.468232	1
98000272	0.287591	0	0.575183	Inf	Inf	0.757737	1
98000273	793.539	1041.82	545.259	0.523372	-0.934091	0.0107251	0.393681
98000275	1284.92	1397.76	1172.09	0.838547	-0.254037	0.472839	1
98000277	0.541088	0.794586	0.287591	0.361939	-1.46618	0.868917	1
98000278	0.499769	0.999538	0	0	#NAME?	0.396248	1
98000282	283.568	310.442	256.694	0.826864	-0.274278	0.457239	1
98000284	2313.4	2010.56	2616.23	1.30125	0.379896	0.291629	1
98000285	865.103	811.866	918.341	1.13115	0.177789	0.5819	1
98000286	0.327553	0.655107	0	0	#NAME?	0.479461	1
98000287	0.310676	0.621352	0	0	#NAME?	0.466999	1
98000288	0.327553	0.655107	0	0	#NAME?	0.529427	1
98000289	0.94161	1.35046	0.532757	0.394499	-1.34191	0.857115	1
98000290	345.842	267.847	423.837	1.58239	0.662102	0.125545	0.842527
98000291	0.225077	0.450154	0	0	#NAME?	0.891297	1
98000293	0.713304	1.13902	0.287591	0.252491	-1.9857	0.644212	1
98000296	360.807	322.083	399.531	1.24046	0.310873	0.382216	1
98000297	71.4957	59.4048	83.5866	1.40707	0.492694	0.200983	0.930995
98000300	0.564862	0.344431	0.785293	2.27997	1.18901	0.89298	1
98000301	0.482891	0.965783	0	0	#NAME?	0.309382	1
98000303	0.172216	0.344431	0	0	#NAME?	0.909304	1
98000304	44.6446	46.3527	42.9365	0.926299	-0.110451	0.748161	1
98000305	0.458436	0.655107	0.261764	0.399575	-1.32346	0.85358	1
98000306	406.069	472.445	339.693	0.719011	-0.475913	0.186481	0.919309
98000308	0.589318	0.655107	0.523528	0.79915	-0.323462	1	1
98000310	0.88552	1.48345	0.287591	0.193867	-2.36686	0.428721	1
98000311	4.70159	7.53391	1.86926	0.248113	-2.01093	0.285835	0.997429
98000312	0.598267	0.621352	0.575183	0.925696	-0.11139	1	1
98000313	0.643565	0.999538	0.287591	0.287724	-1.79724	0.576588	1
98000316	0.900309	1.80062	0	0	#NAME?	0.379337	1
98000317	1.24441	1.41594	1.07288	0.75772	-0.400263	0.978179	1
98000324	0.143796	0	0.287591	Inf	Inf	1	1
98000326	1.35317	1.58917	1.11717	0.702987	-0.508429	0.980694	1
98000327	1.014	1.2427	0.785293	0.631923	-0.662179	0.867836	1
98000328	0.135496	0	0.270992	Inf	Inf	1	1
98000329	0.130882	0	0.261764	Inf	Inf	1	1
98000330	8.38382	10.4223	6.3453	0.608817	-0.71592	0.358724	1
98000332	0.310676	0.621352	0	0	#NAME?	0.560584	1
98000335	0.524211	0.76083	0.287591	0.377997	-1.40355	0.892115	1
98000337	0.299134	0.310676	0.287591	0.925696	-0.11139	1	1
98000338	0.504369	0.450154	0.558584	1.24087	0.311353	1	1
98000339	47.5336	46.0843	48.983	1.0629	0.0880042	0.870567	1
98000343	0.442929	0.310676	0.575183	1.85139	0.88861	1	1
98000344	0.541088	0.794586	0.287591	0.361939	-1.46618	0.86722	1
98000346	627.226	808.083	446.37	0.552382	-0.856263	0.0203616	0.513406
98000348	0.270992	0	0.541985	Inf	Inf	0.777886	1
98000350	240.119	257.259	222.978	0.866745	-0.20632	0.654134	1
98000351	563.214	533.268	593.16	1.11231	0.153562	0.787989	1
98000352	4.6848	4.9452	4.42439	0.894682	-0.160553	1	1
98000353	0.615145	0.655107	0.575183	0.877998	-0.18771	1	1
98000355	1.04546	1.24474	0.846175	0.679801	-0.556817	1	1
98000356	1131.94	1165.3	1098.58	0.942743	-0.0850635	0.921934	1
98000357	0.7202	0.655107	0.785293	1.19872	0.2615	1	1
98000358	0.316011	0.344431	0.287591	0.834975	-0.260196	1	1
98000360	471.131	279.169	663.094	2.37524	1.24807	0.082194	0.765556
98000361	1.46691	2.07104	0.862774	0.416589	-1.2633	0.430604	1
98000362	2.2141	3.86963	0.558584	0.144351	-2.79235	0.0690967	0.742054
98000363	1.59108	2.65864	0.523528	0.196916	-2.34435	0.21553	0.943517
98000364	0.920821	0.794586	1.04706	1.31774	0.398065	0.965889	1
98000365	1.09507	1.34397	0.846175	0.629609	-0.667472	0.787154	1
98000367	1.22753	1.38218	1.07288	0.776225	-0.365453	0.970542	1
98000369	2.78274	4.14412	1.42136	0.342981	-1.5438	0.268264	0.988785
98000370	135.717	152.799	118.635	0.776414	-0.365102	0.402515	1
98000371	488.948	446.44	531.455	1.19043	0.251481	0.505151	1
98000373	0.261764	0	0.523528	Inf	Inf	0.729682	1
98000375	0.459807	0.344431	0.575183	1.66995	0.739804	1	1
98000376	0.569508	1.13902	0	0	#NAME?	0.242055	0.96784
98000378	1.61821	2.69443	0.541985	0.20115	-2.31366	0.212677	0.940516
98000381	1.69867	1.6884	1.70895	1.01217	0.0174521	1	1
98000383	6143.33	4836.64	7450.02	1.54033	0.623238	0.0973632	0.794916
98000386	0.172216	0.344431	0	0	#NAME?	0.896034	1
98000388	1038.61	953.118	1124.11	1.1794	0.238055	0.454783	1
98000391	3.2286	3.93714	2.52007	0.640077	-0.643684	0.645304	1
98000394	0.143796	0	0.287591	Inf	Inf	1	1
98000396	71.3193	76.0301	66.6086	0.876082	-0.190861	0.797169	1
98000398	190.095	146.056	234.134	1.60305	0.680817	0.0741548	0.753832
98000400	5.09923	4.00261	6.19585	1.54795	0.630362	0.599783	1
98000401	11.4602	16.0885	6.83192	0.424646	-1.23567	0.0467979	0.667682
98000402	0.541088	0.794586	0.287591	0.361939	-1.46618	0.862384	1
98000404	0.287591	0	0.575183	Inf	Inf	0.759722	1
98000405	0.499769	0.999538	0	0	#NAME?	0.373239	1
98000408	1.29895	2.03933	0.558584	0.273906	-1.86825	0.591791	1
98000409	102.504	120.789	84.2193	0.697242	-0.520269	0.22827	0.954624
98029164	76.0978	149.029	3.167	0.021251	-5.55633	1.04e-06	0.000767156
98000412	581.927	678.929	484.925	0.714251	-0.485498	0.186364	0.919309
98000413	1.21341	1.27646	1.15037	0.901216	-0.150055	0.970715	1
98000414	933.345	884.971	981.72	1.10932	0.14968	0.661768	1
98000415	1.81474	2.00353	1.62595	0.811543	-0.30126	0.912243	1
98000419	0.615145	0.655107	0.575183	0.877998	-0.18771	1	1
98000420	0.417102	0.310676	0.523528	1.68513	0.752858	1	1
98023259	55.2074	107.301	3.11371	0.0290184	-5.10689	3.3e-18	4.78e-14
98000425	1.38221	1.10526	1.65915	1.50114	0.586058	0.872106	1
98000427	4.40715	4.97247	3.84183	0.772621	-0.372167	0.833004	1
98000431	0.929088	0	1.85818	Inf	Inf	0.170514	0.904834
98000433	44.2035	52.3909	36.016	0.687446	-0.540681	0.261996	0.983666
98000435	0.310676	0.621352	0	0	#NAME?	0.494895	1
98000436	0.482891	0.965783	0	0	#NAME?	0.261921	0.983666
98000437	0.770483	0.965783	0.575183	0.595561	-0.747679	0.854328	1
98000440	18.7447	31.4464	6.04291	0.192165	-2.37958	0.00657846	0.315734
98000443	82.1608	66.9986	97.323	1.45261	0.53865	0.332894	1
98000444	5.12802	5.91099	4.34505	0.73508	-0.444027	0.810583	1
98000445	1.57523	0.794586	2.35588	2.96491	1.56799	0.312335	1
98000449	1.01702	0.655107	1.37893	2.1049	1.07375	0.79303	1
98000450	0.327553	0.655107	0	0	#NAME?	0.458324	1
98000452	866.701	1017.8	715.605	0.703092	-0.508216	0.14428	0.86886
98000454	296.958	255.882	338.033	1.32105	0.401683	0.244264	0.969794
98030491	4.7403	9.19302	0.287591	0.0312837	-4.99845	0.000551648	0.0860947
98036186	262.218	507.082	17.3547	0.0342247	-4.86882	1.16e-06	0.000841883
98000459	1.94845	1.6884	2.20851	1.30805	0.387415	0.972411	1
98000460	7.1512	10.4606	3.84183	0.367268	-1.44509	0.07139	0.748457
98000461	492.276	355.306	629.246	1.771	0.824562	0.0439568	0.654878
98000462	0.668006	0.76083	0.575183	0.755993	-0.403555	1	1
98000464	0.172216	0.344431	0	0	#NAME?	0.893867	1
98000465	0.225077	0.450154	0	0	#NAME?	0.903468	1
98000466	0.713304	1.13902	0.287591	0.252491	-1.9857	0.643951	1
98000468	383.437	271.054	495.82	1.82923	0.871234	0.0491836	0.677089
98000469	303.647	381.163	226.13	0.593263	-0.753256	0.0667744	0.736122
98000470	3.49657	4.52473	2.46841	0.545538	-0.874248	0.362575	1
98000471	1.10456	0.900309	1.30882	1.45375	0.539776	0.89413	1
98000472	943.755	652.628	1234.88	1.89217	0.920042	0.0135023	0.434911
98000473	0.663639	0	1.32728	Inf	Inf	0.360622	1
98000474	1.85057	3.14255	0.558584	0.177749	-2.49209	0.165849	0.898675
98000475	136.774	135.479	138.069	1.01912	0.0273242	0.949507	1
98000476	184.773	161.226	208.321	1.29211	0.369726	0.451344	1
98000478	0.155338	0.310676	0	0	#NAME?	0.89274	1
98000481	0.466014	0.932027	0	0	#NAME?	0.296332	1
98000482	484.416	451.058	517.774	1.14791	0.199012	0.920277	1
98000484	0	0	0	NA	NA	NA	NA
98000485	1022.7	927.855	1117.54	1.20443	0.268352	0.452892	1
98000486	2.11905	3.10434	1.13377	0.36522	-1.45316	0.267732	0.988296
98000487	2400.55	2515.04	2286.06	0.908957	-0.137717	0.673067	1
98000488	0.765147	1.2427	0.287591	0.231424	-2.11139	0.432536	1
98000494	0.81578	1.34397	0.287591	0.213987	-2.22441	0.41267	1
98000496	3367.84	2734.09	4001.59	1.46359	0.549511	0.135656	0.85576
98000497	1.56144	2.06659	1.05629	0.511125	-0.968251	0.604384	1
98000498	5.96814	9.2227	2.71358	0.294228	-1.76499	0.0367425	0.626289
98000499	0.451507	0.344431	0.558584	1.62176	0.697558	1	1
98000500	1.20999	0.76083	1.65915	2.18071	1.1248	0.693865	1
98019946	4.20029	8.11298	0.287591	0.0354483	-4.81814	0.000528157	0.0836319
98000503	0.834887	1.38218	0.287591	0.208071	-2.26486	0.425675	1
98000504	639.124	658.375	619.873	0.94152	-0.0869368	0.855725	1
98000505	446.393	516.65	376.136	0.728029	-0.457931	0.218223	0.945488
98000509	9.9811	15.0235	4.93869	0.328731	-1.60502	0.0191256	0.504066
98000511	0.172216	0.344431	0	0	#NAME?	0.908274	1
98000512	0.789939	0.794586	0.785293	0.988305	-0.0169721	1	1
98000513	0.28622	0.310676	0.261764	0.842564	-0.247142	1	1
98000515	2.09616	2.28249	1.90983	0.836731	-0.257164	1	1
98000516	0.397293	0.794586	0	0	#NAME?	0.574474	1
98000520	2.94962	4.76548	1.13377	0.237912	-2.0715	0.0928078	0.785858
98000521	1174.82	1065.12	1284.51	1.20598	0.270204	0.521526	1
98000524	20.5253	14.2224	26.8282	1.88633	0.915581	0.110186	0.822645
98000528	23.542	18.8143	28.2698	1.50257	0.587433	0.533629	1
98000529	0.143796	0	0.287591	Inf	Inf	1	1
98000530	1.4478	2.03283	0.862774	0.42442	-1.23644	0.510945	1
98000531	250.671	305.276	196.065	0.642256	-0.638779	0.106182	0.815071
98000532	2.9433	1.62089	4.26571	2.63171	1.396	0.418111	1
98000533	0.753884	0.965783	0.541985	0.561187	-0.833447	0.850762	1
98000535	0.310676	0.621352	0	0	#NAME?	0.55393	1
98000536	1.48267	1.35046	1.61487	1.19579	0.257962	0.870138	1
98000539	189.123	150.007	228.24	1.52153	0.605527	0.181803	0.915382
98000540	98.712	64.1015	133.322	2.07987	1.05649	0.0109624	0.397003
98000544	1.28598	0.450154	2.1218	4.71349	2.2368	0.386548	1
98000545	3.4685	4.27507	2.66193	0.622662	-0.683479	0.472749	1
98000546	0.930017	0	1.86003	Inf	Inf	0.246675	0.970684
98000548	0.765147	1.2427	0.287591	0.231424	-2.11139	0.470877	1
98000549	0.621352	1.2427	0	0	#NAME?	0.517998	1
98052538	3.89921	7.52742	0.270992	0.0360007	-4.79583	0.000659326	0.0957899
98000553	1.37994	2.21052	0.549356	0.248518	-2.00858	0.325488	1
98000554	1.31089	0.999538	1.62224	1.62299	0.698653	0.886011	1
98000555	77.4382	82.6889	72.1874	0.873	-0.195946	0.614723	1
98000556	0.62237	1.24474	0	0	#NAME?	0.275661	0.992755
98000557	0.450154	0.900309	0	0	#NAME?	0.493423	1
98000558	0.60151	0.932027	0.270992	0.290756	-1.78212	0.608794	1
98000559	81.4268	107.96	54.8941	0.508468	-0.97577	0.103124	0.807787
98000562	5492.9	5593.67	5392.12	0.963969	-0.0529416	0.870925	1
98000563	3.05967	2.86563	3.25371	1.13542	0.183232	0.97387	1
98000564	87.2856	114.256	60.3151	0.527894	-0.921679	0.0228825	0.533923
98000565	514.785	588.483	441.087	0.749532	-0.415938	0.221272	0.94865
98000567	56.9332	55.6641	58.2024	1.0456	0.0643322	0.845916	1
98000570	143.087	78.769	207.406	2.63309	1.39676	0.00488483	0.273411
98000571	0.831273	1.13902	0.523528	0.459632	-1.12145	0.811331	1
98000573	1.96688	0.965783	2.96797	3.07313	1.61971	0.339945	1
98000574	0.143796	0	0.287591	Inf	Inf	1	1
98000575	631.689	769.256	494.122	0.642338	-0.638596	0.0711032	0.74767
98000576	0.621352	1.2427	0	0	#NAME?	0.281047	0.995901
98000577	34.2521	24.3475	44.1567	1.8136	0.858859	0.142534	0.865734
98000578	0.299134	0.310676	0.287591	0.925696	-0.11139	1	1
98000579	401.494	402.878	400.111	0.99313	-0.00994555	0.899303	1
98000580	7493.55	9159.39	5827.7	0.636254	-0.652325	0.0817251	0.765007
98000583	0	0	0	NA	NA	NA	NA
98000585	1614.38	1577.08	1651.68	1.0473	0.0666759	0.833313	1
98000586	0.466014	0.932027	0	0	#NAME?	0.354871	1
98000587	142.242	146.159	138.325	0.946403	-0.0794731	0.807913	1
98000589	0.972475	0.794586	1.15037	1.44775	0.533817	0.969063	1
98000590	11.1131	12.1941	10.0322	0.82271	-0.281544	0.711726	1
98000591	0.172216	0.344431	0	0	#NAME?	0.90612	1
98000592	11.0002	14.4367	7.5637	0.523922	-0.932575	0.401648	1
98000593	158.068	182.878	133.259	0.728678	-0.456646	0.242929	0.96816
98000594	155.797	199.462	112.132	0.562173	-0.830915	0.0400395	0.638205
98000595	0.397293	0.794586	0	0	#NAME?	0.453248	1
98000596	3.25584	1.86609	4.64558	2.48947	1.31584	0.30875	1
98000597	93.2457	48.124	138.367	2.87523	1.52368	0.0191485	0.504066
98000599	0.684884	0.794586	0.575183	0.723877	-0.466183	1	1
98000600	0.840222	1.10526	0.575183	0.520404	-0.942296	0.835805	1
98000603	2.04822	3.00511	1.09134	0.363162	-1.46132	0.368129	1
98000607	1468.66	1614.68	1322.65	0.819141	-0.287816	0.457685	1
98000608	0.344431	0.688862	0	0	#NAME?	0.543539	1
98000611	0.261764	0	0.523528	Inf	Inf	0.770727	1
98000612	0.959119	1.10526	0.812977	0.735552	-0.443101	1	1
98000613	0	0	0	NA	NA	NA	NA
98000614	0.261764	0	0.523528	Inf	Inf	0.75436	1
98000620	0.737746	0.900309	0.575183	0.638873	-0.6464	1	1
98000621	2.9108	4.45926	1.36233	0.305507	-1.71072	0.188331	0.92158
98000622	0.327553	0.655107	0	0	#NAME?	0.576263	1
98000623	0.446172	0.621352	0.270992	0.436134	-1.19716	0.886754	1
98000628	0.299134	0.310676	0.287591	0.925696	-0.11139	1	1
98000629	149.556	154.909	144.202	0.930886	-0.103323	0.848777	1
98000631	14.6121	14.8414	14.3828	0.969102	-0.0452793	1	1
98000632	0.767519	0.688862	0.846175	1.22837	0.29674	1	1
98000633	0.482891	0.965783	0	0	#NAME?	0.316426	1
98000634	546.116	652.925	439.306	0.672827	-0.571692	0.10959	0.821633
98000635	0.863995	0.655107	1.07288	1.63772	0.711692	0.976467	1
98000636	2.65879	4.4548	0.862774	0.193673	-2.36831	0.0554012	0.697589
98000637	1.0009	1.13902	0.862774	0.757473	-0.400735	1	1
98000638	1.12644	1.41594	0.836947	0.59109	-0.758549	0.807186	1
98000639	7.63494	2.75991	12.51	4.53275	2.18039	0.00878233	0.361175
98000641	261.578	206.484	316.672	1.53364	0.616957	0.12499	0.841518
98000642	2.10864	0.688862	3.52841	5.12209	2.35673	0.204196	0.934412
98000643	1.53131	2.48744	0.575183	0.231234	-2.11257	0.239624	0.965239
98000644	1395.89	1419.07	1372.7	0.967319	-0.0479362	0.905669	1
98000645	8.0197	10.9091	5.13034	0.470282	-1.0884	0.120419	0.836731
98000649	0	0	0	NA	NA	NA	NA
98000650	1238.49	1318.24	1158.73	0.878997	-0.18607	0.632651	1
98000651	327.108	250.315	403.902	1.61358	0.690264	0.0616406	0.720617
98000652	0.693151	0	1.3863	Inf	Inf	0.277588	0.994184
98000653	0.143796	0	0.287591	Inf	Inf	1	1
98000655	64.2482	33.399	95.0975	2.84732	1.5096	0.00642539	0.312532
98000656	1.12539	2.25077	0	0	#NAME?	0.241203	0.966789
98000657	1.171	1.52166	0.820348	0.539114	-0.891339	0.831512	1
98000658	1.754	3.24624	0.261764	0.0806362	-3.63243	0.172876	0.908421
98000661	159.545	116.76	202.331	1.73288	0.793169	0.06241	0.724199
98000662	0.82868	0.794586	0.862774	1.08582	0.11878	1	1
98000664	0.536442	0	1.07288	Inf	Inf	0.408051	1
98000665	0.155338	0.310676	0	0	#NAME?	0.887262	1
98000667	2.0264	1.89781	2.155	1.13552	0.18335	1	1
98000669	0	0	0	NA	NA	NA	NA
98000670	1.7948	1.86405	1.72555	0.925696	-0.11139	0.916696	1
98000671	3.36797	5.87316	0.862774	0.146901	-2.76708	0.0240872	0.54349
98000673	302.057	295.363	308.751	1.04532	0.0639512	0.884417	1
98000676	17.922	17.3854	18.4587	1.06174	0.0864283	0.945649	1
98000678	279.6	345.698	213.502	0.617597	-0.695262	0.0902806	0.783492
98000681	1.79236	0.932027	2.6527	2.84616	1.50902	0.472016	1
98000683	786.319	745.053	827.585	1.11077	0.151565	0.687464	1
98000684	0.933735	0.794586	1.07288	1.35024	0.43322	0.968551	1
98000688	887.143	756.818	1017.47	1.3444	0.426967	0.267502	0.988259
98000689	474.024	508.698	439.351	0.863678	-0.211434	0.603168	1
98000690	6972.33	5826.51	8118.14	1.39331	0.478517	0.203686	0.934077
98000691	68.8384	76.2209	61.456	0.806288	-0.310633	0.51233	1
98000693	0	0	0	NA	NA	NA	NA
98000694	404.653	318.952	490.355	1.5374	0.620489	0.100189	0.79953
98000696	0.564862	0.344431	0.785293	2.27997	1.18901	0.882703	1
98000697	33.6568	35.8324	31.4811	0.878566	-0.186778	0.748541	1
98000698	730.583	573.356	887.811	1.54845	0.630822	0.0872645	0.776438
98000699	1.79559	0.621352	2.96983	4.77963	2.2569	0.296657	1
98000700	0.921504	1.55542	0.287591	0.184897	-2.43521	0.420156	1
98000702	75.6783	63.0231	88.3336	1.40161	0.487081	0.235385	0.961341
98000704	1157.53	1030.61	1284.45	1.2463	0.317652	0.45732	1
98000705	100.77	79.0339	122.507	1.55005	0.632318	0.213274	0.940686
98000706	6.1771	7.94828	4.40593	0.554325	-0.851196	0.538397	1
98000707	6.4334	6.67831	6.18848	0.926654	-0.109898	0.949347	1
98000713	0.172216	0.344431	0	0	#NAME?	0.889047	1
98000714	6.82824	5.38683	8.26965	1.53516	0.618391	0.719037	1
98000716	103.354	84.3597	122.348	1.45031	0.536361	0.21542	0.943517
98000717	79.1307	89.9179	68.3435	0.760066	-0.395803	0.305864	1
98000719	0.261764	0	0.523528	Inf	Inf	0.783569	1
98000721	0.466014	0.932027	0	0	#NAME?	0.346677	1
98000722	1.28108	0.344431	2.21774	6.43884	2.6868	0.264909	0.985899
98000723	0.172216	0.344431	0	0	#NAME?	0.896431	1
98000724	50.5014	64.0779	36.9249	0.57625	-0.795234	0.089553	0.78251
98000725	0	0	0	NA	NA	NA	NA
98000726	0.846429	1.69286	0	0	#NAME?	0.146715	0.872316
98000727	0.327553	0.655107	0	0	#NAME?	0.492738	1
98000728	38.3511	26.4751	50.2271	1.89715	0.923832	0.0527168	0.687434
98000730	0.155338	0.310676	0	0	#NAME?	0.881257	1
98000731	0.535753	1.07151	0	0	#NAME?	0.329831	1
98000734	1.68563	2.79608	0.575183	0.20571	-2.28131	0.448487	1
98000737	47.0347	29.1126	64.9569	2.23123	1.15784	0.0129736	0.429356
98031837	3.8317	7.3924	0.270992	0.0366582	-4.76972	0.000281289	0.0528325
98000744	2115.54	2812.62	1418.47	0.504321	-0.987586	0.00592144	0.302559
98000745	0.406488	0	0.812977	Inf	Inf	0.519246	1
98000748	0.299134	0.310676	0.287591	0.925696	-0.11139	1	1
98000749	1.21098	2.42197	0	0	#NAME?	0.180826	0.914538
98000750	1.78913	3.00307	0.575183	0.191531	-2.38435	0.109431	0.821148
98000751	435.082	320.297	549.867	1.71674	0.779671	0.117732	0.833179
98000752	382.38	422.888	341.872	0.808423	-0.306818	0.358646	1
98000753	0.578425	0.310676	0.846175	2.72366	1.44555	0.911435	1
98000756	0	0	0	NA	NA	NA	NA
98000758	4.34159	1.24474	7.43844	5.9759	2.57916	0.0561079	0.698925
98000759	17.6861	11.6743	23.6979	2.02991	1.02141	0.100444	0.800511
98000761	3656	3676.35	3635.65	0.988928	-0.0160626	0.968278	1
98000762	0.785293	0	1.57059	Inf	Inf	0.378865	1
98000763	0.130882	0	0.261764	Inf	Inf	1	1
98000764	0.512668	0.450154	0.575183	1.27775	0.3536	1	1
98000765	1.15651	1.48345	0.829576	0.559222	-0.838508	0.813758	1
98000766	0	0	0	NA	NA	NA	NA
98000768	116.242	98.9697	133.514	1.34904	0.431929	0.257907	0.979757
98000770	606.55	582.852	630.248	1.08132	0.112792	0.874839	1
98000773	285.13	301.511	268.748	0.891336	-0.165958	0.663943	1
98000774	4.73262	4.4548	5.01043	1.12473	0.169574	0.85493	1
98000775	9.89981	12.1916	7.60798	0.624033	-0.680305	0.363707	1
98000777	0.900309	1.80062	0	0	#NAME?	0.177193	0.912939
98000781	6.97163	5.80972	8.13353	1.39999	0.485413	0.696341	1
98000782	0.172216	0.344431	0	0	#NAME?	0.905168	1
98000783	6.18406	3.97293	8.39519	2.1131	1.07936	0.359315	1
98000784	0.155338	0.310676	0	0	#NAME?	0.900608	1
98000787	468.414	469.183	467.645	0.996723	-0.00473602	0.997812	1
98000789	0.431387	0	0.862774	Inf	Inf	0.610417	1
98000790	2.34919	0.688862	4.00952	5.82049	2.54114	0.164492	0.8968
98000791	2.09084	3.10879	1.07288	0.345113	-1.53486	0.294588	1
98000793	0	0	0	NA	NA	NA	NA
98000794	0.954226	1.07151	0.836947	0.781094	-0.356432	1	1
98000795	0.316011	0.344431	0.287591	0.834975	-0.260196	1	1
98000796	0.155338	0.310676	0	0	#NAME?	0.901424	1
98000797	0.511297	0.76083	0.261764	0.344051	-1.53931	0.88292	1
98000799	1.2365	1.89781	0.575183	0.303077	-1.72224	0.366925	1
98000800	0.172216	0.344431	0	0	#NAME?	0.934649	1
98000801	1.03329	2.06659	0	0	#NAME?	0.181181	0.914595
98000802	2.44163	1.58713	3.29613	2.07678	1.05435	0.557686	1
98000805	0.466014	0.932027	0	0	#NAME?	0.399084	1
98000807	3.54862	5.65929	1.43796	0.254088	-1.9766	0.108808	0.820114
98000809	0.344431	0.688862	0	0	#NAME?	0.528035	1
98000812	2.00266	3.14255	0.862774	0.274546	-1.86488	0.218155	0.945488
98000813	1.21307	2.13855	0.287591	0.134479	-2.89454	0.224641	0.951055
98000815	183.602	142.848	224.355	1.57059	0.651304	0.224892	0.951055
98000816	0.598267	0.621352	0.575183	0.925696	-0.11139	1	1
98000817	414.044	436.358	391.729	0.897723	-0.155658	0.777808	1
98000819	0.155338	0.310676	0	0	#NAME?	0.891849	1
98000821	0.442929	0.310676	0.575183	1.85139	0.88861	1	1
98000822	0.638229	1.27646	0	0	#NAME?	0.302823	1
98000823	3328.6	2652.4	4004.81	1.50988	0.594435	0.359705	1
98000824	440.62	457.852	423.388	0.924728	-0.112899	0.745366	1
98000825	1.0927	1.89781	0.287591	0.151538	-2.72224	0.248034	0.971514
98000826	0.536442	0	1.07288	Inf	Inf	0.434786	1
98000828	1.58834	0.450154	2.72652	6.05686	2.59857	0.456165	1
98000829	6990.54	6982.41	6998.67	1.00233	0.00335608	0.950743	1
98000830	0.532789	0.794586	0.270992	0.341049	-1.55195	0.893592	1
98000831	3.40085	5.07615	1.72555	0.339932	-1.55668	0.158466	0.88931
98000832	0.316011	0.344431	0.287591	0.834975	-0.260196	1	1
98000834	219.812	184.45	255.173	1.38343	0.46825	0.242594	0.96816
98000835	246.299	184.276	308.323	1.67316	0.742574	0.0566311	0.701214
98000838	1.3145	1.2427	1.3863	1.11555	0.15776	1	1
98000839	0.417102	0.310676	0.523528	1.68513	0.752858	1	1
98000841	0.512668	0.450154	0.575183	1.27775	0.3536	1	1
98000844	0.675232	1.35046	0	0	#NAME?	0.24667	0.970684
98028953	3.9626	7.6376	0.287591	0.0376547	-4.73103	0.000493382	0.0795775
98000846	385.949	342.834	429.064	1.25152	0.323684	0.365219	1
98000848	1.0844	1.89781	0.270992	0.142792	-2.80801	0.231415	0.95742
98000849	4.17351	4.73376	3.61327	0.763298	-0.389683	0.864486	1
98000850	0	0	0	NA	NA	NA	NA
98000851	213.786	186.433	241.139	1.29343	0.371205	0.288638	0.998895
98000853	0	0	0	NA	NA	NA	NA
98000854	0.668006	0.76083	0.575183	0.755993	-0.403555	1	1
98000855	646.376	495.995	796.756	1.60638	0.683813	0.218174	0.945488
98000856	2.30303	1.89985	2.70621	1.42444	0.51039	0.723096	1
98000857	14.3227	8.60135	20.044	2.33034	1.22054	0.0556551	0.698205
98000858	263.747	266.938	260.555	0.976087	-0.0349187	0.994354	1
98000859	8.99623	4.21609	13.7764	3.26757	1.70822	0.0153001	0.458127
98000860	1.51241	0.344431	2.68038	7.78205	2.96015	0.184987	0.917319
98000861	76.7205	98.037	55.4041	0.565135	-0.823333	0.0666621	0.735947
98000862	0.840222	1.10526	0.575183	0.520404	-0.942296	0.85544	1
98000863	1.40508	1.44969	1.36048	0.938458	-0.0916362	1	1
98000864	0.454471	0.621352	0.287591	0.462848	-1.11139	0.848317	1
98000866	0.466014	0.932027	0	0	#NAME?	0.440096	1
98000867	0.754605	0.688862	0.820348	1.19087	0.25202	1	1
98000868	1286.31	1129.04	1443.59	1.2786	0.35457	0.350431	1
98000873	2.47917	3.38775	1.57059	0.463607	-1.10903	0.48002	1
98000876	116.988	109.095	124.881	1.1447	0.194973	0.587481	1
98000877	202.816	203.812	201.82	0.990227	-0.0141695	0.933739	1
98000879	4.03795	2.42197	5.65393	2.33443	1.22307	0.632347	1
98000883	1501.69	1372.78	1630.59	1.1878	0.248293	0.518806	1
98000884	0.552631	1.10526	0	0	#NAME?	0.325638	1
98000886	4.56006	4.7972	4.32293	0.901138	-0.15018	0.890867	1
98000887	11.2339	8.24354	14.2243	1.72551	0.787025	0.382633	1
98000889	1599.21	1173.44	2024.97	1.72567	0.787156	0.0535353	0.689633
98000890	0.143796	0	0.287591	Inf	Inf	1	1
98000891	0.172216	0.344431	0	0	#NAME?	0.895638	1
98000892	2.43062	3.00307	1.85818	0.618759	-0.692551	0.615555	1
98000893	0.466014	0.932027	0	0	#NAME?	0.43232	1
98000895	2.5461	2.11129	2.98092	1.41189	0.497628	0.762071	1
98000898	1.29401	0.965783	1.62224	1.67971	0.748216	0.89213	1
98000900	0.316011	0.344431	0.287591	0.834975	-0.260196	1	1
98000901	0.688862	1.37772	0	0	#NAME?	0.161062	0.892831
98000902	0.785293	0	1.57059	Inf	Inf	0.435012	1
98000903	0.299134	0.310676	0.287591	0.925696	-0.11139	1	1
98000904	1.35215	1.58713	1.11717	0.703889	-0.506579	0.79825	1
98000905	3.98788	3.76148	4.21428	1.12038	0.163984	0.950253	1
98000906	1.40871	2.24224	0.575183	0.256521	-1.96285	0.191827	0.924128
98000907	542.854	500.417	585.29	1.16961	0.226022	0.575097	1
98000910	0.327553	0.655107	0	0	#NAME?	0.543888	1
98000911	63.8978	56.5712	71.2244	1.25902	0.332302	0.413089	1
98000913	0.380415	0.76083	0	0	#NAME?	0.561421	1
98000914	1.12809	1.13902	1.11717	0.980817	-0.0279437	1	1
98000915	4.35441	5.93621	2.7726	0.467066	-1.0983	0.191142	0.924019
98000918	113.719	91.378	136.06	1.48898	0.574323	0.232219	0.95836
98000919	0.802131	1.07151	0.532757	0.497204	-1.00809	0.85034	1
98000920	0.327553	0.655107	0	0	#NAME?	0.459799	1
98000922	11.7421	15.3618	8.12228	0.528732	-0.919393	0.118646	0.833363
98000924	1.11515	0.344431	1.88586	5.47529	2.45294	0.360692	1
98000925	500.619	455.409	545.829	1.19854	0.261284	0.550899	1
98000927	1.49921	0.310676	2.68775	8.65131	3.11292	0.158578	0.889491
98000931	386.244	328.097	444.392	1.35445	0.43771	0.256337	0.979091
98000932	0.172216	0.344431	0	0	#NAME?	0.87976	1
98000935	10.8478	12.6755	9.02011	0.711616	-0.49083	0.587348	1
98000938	1.24906	2.21052	0.287591	0.130101	-2.9423	0.180454	0.91444
98000940	1.70955	1.48345	1.93566	1.30484	0.38387	0.936882	1
98000943	828.183	826.333	830.032	1.00448	0.00644254	0.995328	1
98000944	0.849418	0.310676	1.38816	4.46819	2.15969	0.483869	1
98000945	849.75	853.736	845.764	0.990662	-0.0135353	0.961696	1
98000946	2.86186	1.13902	4.5847	4.02514	2.00904	0.147512	0.873856
98000948	0	0	0	NA	NA	NA	NA
98000949	1765.36	1957.23	1573.49	0.803938	-0.314843	0.392807	1
98000950	0.668006	0.76083	0.575183	0.755993	-0.403555	1	1
98000955	0	0	0	NA	NA	NA	NA
98000956	4.46627	5.82807	3.10448	0.532677	-0.908666	0.463881	1
98000957	0.643565	0.999538	0.287591	0.287724	-1.79724	0.63368	1
98000958	0.873242	0.900309	0.846175	0.939872	-0.0894641	1	1
98000959	0.482891	0.965783	0	0	#NAME?	0.390469	1
98018166	2108.45	4060.85	156.06	0.0384303	-4.70161	3.86e-28	1.67e-23
98000963	121.252	133.04	109.464	0.822788	-0.281408	0.514982	1
98000967	1424.29	1972.22	876.358	0.444352	-1.17023	0.00138805	0.141369
98000968	0.172216	0.344431	0	0	#NAME?	0.93909	1
98000969	0.310676	0.621352	0	0	#NAME?	0.492156	1
98000971	1.05997	0	2.11994	Inf	Inf	0.193868	0.924978
98000975	7.74437	8.11298	7.37576	0.909131	-0.13744	0.877372	1
98000976	0.414788	0	0.829576	Inf	Inf	0.552751	1
98000978	75.7292	45.4531	106.005	2.33219	1.22169	0.156292	0.885866
98000979	1.05698	1.31021	0.803749	0.613449	-0.704986	0.79278	1
98000980	355.539	385.312	325.766	0.845459	-0.242193	0.492615	1
98000981	127.703	94.703	160.703	1.69692	0.762918	0.154392	0.884194
98000982	0.414788	0	0.829576	Inf	Inf	0.583589	1
98000983	3.8073	6.49005	1.12454	0.173271	-2.5289	0.0282385	0.58012
98000986	1.46778	2.93556	0	0	#NAME?	0.037587	0.630936
98000989	0.303098	0.344431	0.261764	0.75999	-0.395948	1	1
98000990	1.53455	0.344431	2.72466	7.91062	2.98379	0.152993	0.881769
98000991	10.0913	11.2344	8.94826	0.796507	-0.328241	0.940257	1
98000992	0.316011	0.344431	0.287591	0.834975	-0.260196	1	1
98000993	0.310676	0.621352	0	0	#NAME?	0.53667	1
98000994	2.75729	2.17231	3.34227	1.53858	0.6216	0.670802	1
98000995	0.766166	1.24474	0.287591	0.231045	-2.11375	0.628136	1
98000997	116.86	122.938	110.782	0.901122	-0.150206	0.718134	1
98000998	68.6994	59.7459	77.6528	1.29972	0.378199	0.391102	1
98000999	0	0	0	NA	NA	NA	NA
98001000	0.863306	1.72661	0	0	#NAME?	0.1986	0.930581
98001001	0.290834	0.310676	0.270992	0.872267	-0.197158	1	1
98001002	4.65353	5.6975	3.60955	0.633532	-0.65851	0.499447	1
98001003	0.310676	0.621352	0	0	#NAME?	0.544525	1
98001004	19.8944	19.5271	20.2617	1.03762	0.0532808	0.773865	1
98001007	386.942	416.722	357.161	0.857071	-0.222513	0.550975	1
98001008	32.4538	40.9501	23.9576	0.585043	-0.773386	0.161836	0.893681
98001009	2.95205	3.31578	2.58832	0.780606	-0.357333	0.820943	1
98001010	2.4606	0.310676	4.61053	14.8403	3.89145	0.0128563	0.427757
98001012	2901.21	2175.22	3627.2	1.66751	0.737696	0.0431733	0.651164
98001013	1266.28	1781.13	751.439	0.421889	-1.24506	0.000807912	0.107372
98001014	63.4589	57.0943	69.8234	1.22295	0.290365	0.505435	1
98001018	61.684	67.8809	55.4871	0.817418	-0.290855	0.516591	1
98001021	0.225077	0.450154	0	0	#NAME?	0.909016	1
98001026	0.688862	1.37772	0	0	#NAME?	0.16519	0.897704
98001027	0.360573	0.450154	0.270992	0.601999	-0.732168	1	1
98001028	11.0289	13.0984	8.95929	0.683997	-0.547938	0.549887	1
98001029	0.938381	1.58917	0.287591	0.180969	-2.46618	0.364975	1
98001030	0.172216	0.344431	0	0	#NAME?	0.912032	1
98001031	66.6516	31.8233	101.48	3.18886	1.67304	0.131409	0.851034
98001035	0	0	0	NA	NA	NA	NA
98001037	41.8148	29.9235	53.7061	1.79478	0.843809	0.0640909	0.729641
98001038	1.61726	2.44923	0.785293	0.320628	-1.64103	0.33768	1
98001040	0.586725	0.310676	0.862774	2.77709	1.47357	0.906535	1
98001041	9.07411	10.0128	8.13539	0.812497	-0.299566	0.646392	1
98001042	2.01423	1.79412	2.23433	1.24536	0.316566	0.974504	1
98001043	1.1962	2.1048	0.287591	0.136636	-2.87159	0.187763	0.921016
98001044	322.571	352.627	292.515	0.82953	-0.269633	0.471794	1
98001045	0.488227	0.688862	0.287591	0.417487	-1.2602	0.865551	1
98001046	0.172216	0.344431	0	0	#NAME?	0.896275	1
98001047	0.765147	1.2427	0.287591	0.231424	-2.11139	0.440585	1
98001048	219.016	296.157	141.875	0.479053	-1.06174	0.00560867	0.295679
98001049	284.196	269.981	298.412	1.10531	0.144446	0.759023	1
98001052	4.78113	6.42458	3.13768	0.488386	-1.03391	0.320718	1
98001053	1742.05	1786.78	1697.32	0.949934	-0.0741012	0.777877	1
98001054	7.14988	6.3949	7.90486	1.23612	0.305819	0.595967	1
98001055	220.924	159.886	281.962	1.76351	0.818452	0.0346447	0.613772
98001056	1.36012	2.14505	0.575183	0.268144	-1.89892	0.4451	1
98001058	1.24183	1.62089	0.862774	0.532284	-0.909732	0.617179	1
98001059	0.603602	0.344431	0.862774	2.50492	1.32477	0.904475	1
98001060	59.9515	52.9619	66.9412	1.26395	0.337941	0.683774	1
98001061	2.67363	4.48448	0.862774	0.192391	-2.37789	0.0976367	0.795225
98001063	12.6666	11.2913	14.0419	1.2436	0.314525	0.677237	1
98001065	0.172216	0.344431	0	0	#NAME?	0.894659	1
98001069	60.2916	69.4063	51.177	0.737354	-0.43957	0.35493	1
98001070	1.5463	1.65465	1.43796	0.869042	-0.202502	0.940378	1
98001072	0.577054	0.621352	0.532757	0.857416	-0.221933	1	1
98001073	1.55542	3.11083	0	0	#NAME?	0.0380711	0.632479
98001076	0.225077	0.450154	0	0	#NAME?	0.894439	1
98001077	6235.66	7801.53	4669.79	0.598574	-0.740398	0.0323592	0.601271
98001079	1934.2	2050.13	1818.26	0.8869	-0.173157	0.582666	1
98001080	5554.58	6040.96	5068.2	0.838973	-0.253304	0.478758	1
98001082	394.228	358.832	429.624	1.19729	0.259767	0.537416	1
98001084	0.299134	0.310676	0.287591	0.925696	-0.11139	1	1
98001086	1.25595	1.72661	0.785293	0.454817	-1.13664	0.709037	1
98001087	0.143796	0	0.287591	Inf	Inf	1	1
98001088	565.38	567.942	562.819	0.990979	-0.0130742	0.944902	1
98001090	0.368873	0.450154	0.287591	0.638873	-0.6464	1	1
98001091	0.855714	0.900309	0.81112	0.900935	-0.150505	1	1
98001093	45.2266	42.9763	47.4769	1.10472	0.143686	0.643578	1
98001094	0	0	0	NA	NA	NA	NA
98001095	2.59158	2.7664	2.41676	0.873612	-0.194936	1	1
98001097	1.9808	3.17631	0.785293	0.247235	-2.01605	0.187888	0.921016
98001099	1014.24	1045.4	983.086	0.940394	-0.0886633	0.775993	1
98001101	37.7391	25.6914	49.7868	1.93788	0.954477	0.121107	0.837767
98001102	96.5771	99.1645	93.9896	0.947815	-0.0773226	0.853509	1
98001103	1.47312	2.65864	0.287591	0.108172	-3.2086	0.102274	0.806772
98001104	7.01504	12.3986	1.63147	0.131585	-2.92594	0.000749678	0.103425
98001105	940.605	992.013	889.196	0.896355	-0.157858	0.652254	1
98001106	0.7202	0.655107	0.785293	1.19872	0.2615	1	1
98001107	948.435	1155.5	741.372	0.641603	-0.640247	0.0767477	0.758887
98001108	184.73	194.27	175.19	0.901784	-0.149146	0.772482	1
98001109	0.488227	0.688862	0.287591	0.417487	-1.2602	0.866832	1
98001110	74.794	85.0499	64.5381	0.758827	-0.398157	0.361972	1
98001112	1110.97	1293.58	928.366	0.717674	-0.4786	0.1622	0.894068
98001116	6.19902	7.42615	4.97188	0.66951	-0.578823	0.516242	1
98001117	0.705005	1.13902	0.270992	0.237918	-2.07146	0.583593	1
98001119	0.564862	0.344431	0.785293	2.27997	1.18901	0.927487	1
98001120	0.406488	0	0.812977	Inf	Inf	0.517329	1
98001121	0.172216	0.344431	0	0	#NAME?	0.906224	1
98001122	0	0	0	NA	NA	NA	NA
98001124	0.442929	0.310676	0.575183	1.85139	0.88861	1	1
98001126	0.172216	0.344431	0	0	#NAME?	0.907617	1
98001127	0.748606	0.450154	1.04706	2.32599	1.21785	0.800412	1
98001128	6.90634	9.07673	4.73595	0.521768	-0.938519	0.238955	0.964346
98001129	54.5174	58.4093	50.6254	0.866735	-0.206337	0.608433	1
98001130	64.7185	62.2342	67.2027	1.07983	0.11081	0.893789	1
98001131	2.90627	4.66217	1.15037	0.246744	-2.01891	0.128037	0.847331
98001132	1.02488	0.965783	1.08397	1.12237	0.166553	1	1
98001134	2.99263	3.14255	2.84271	0.904589	-0.144666	0.938709	1
98001138	459.095	475.612	442.579	0.930546	-0.103851	0.747059	1
98001139	12.6239	9.70011	15.5477	1.60283	0.680625	0.302305	1
98001140	611.186	568.17	654.203	1.15142	0.203415	0.575781	1
98001141	47.3258	33.7744	60.8773	1.80247	0.849975	0.048848	0.674743
98001143	1405.93	1138.58	1673.28	1.46963	0.555449	0.202109	0.931997
98001145	6.41477	10.0828	2.74678	0.272423	-1.87608	0.0290531	0.582099
98001146	29.0037	24.0303	33.9771	1.41393	0.499706	0.386247	1
98001148	9.7478	7.49812	11.9975	1.60006	0.67813	0.356454	1
98001149	0.299134	0.310676	0.287591	0.925696	-0.11139	1	1
98001150	5.10259	6.56609	3.63909	0.554225	-0.851457	0.39423	1
98001152	7.68252	9.1101	6.25494	0.686594	-0.542471	0.59234	1
98001153	0.984296	1.13902	0.829576	0.728326	-0.457343	1	1
98001154	5.40422	2.38376	8.42467	3.5342	1.82138	0.0526862	0.687434
98001155	0.442929	0.310676	0.575183	1.85139	0.88861	1	1
98001156	1.63481	2.69443	0.575183	0.213471	-2.22789	0.193863	0.924978
98001157	271.55	155.835	387.265	2.48509	1.3133	0.14034	0.862577
98001158	5.76879	7.14274	4.39484	0.615288	-0.700665	0.558475	1
98001160	5.12393	0	10.2479	Inf	Inf	0.0221547	0.526112
98001161	0.225077	0.450154	0	0	#NAME?	0.912572	1
98001162	1.24975	1.13902	1.36048	1.19443	0.256322	1	1
98001163	93.0314	116.56	69.5027	0.596283	-0.745932	0.0765324	0.758887
98001164	0	0	0	NA	NA	NA	NA
98001167	7930.07	6222.15	9637.99	1.54898	0.63132	0.0786829	0.760724
98001169	183.343	194.337	172.35	0.886864	-0.173216	0.696559	1
98001170	2.02056	3.17834	0.862774	0.271454	-1.88122	0.318561	1
98001174	1.98923	1.96532	2.01314	1.02433	0.0346819	1	1
98001175	0.316011	0.344431	0.287591	0.834975	-0.260196	1	1
98001176	11.8291	4.93222	18.726	3.79667	1.92473	0.00798858	0.34385
98001180	0.733113	0.655107	0.81112	1.23815	0.308184	1	1
98001181	7246.95	5005.72	9488.18	1.89547	0.922552	0.0414505	0.6453
98001184	1434.08	1685.04	1183.12	0.702133	-0.510183	0.159756	0.89207
98001186	13.7337	13.7723	13.6952	0.994402	-0.0080986	0.988067	1
98001190	1.13936	1.41594	0.862774	0.609331	-0.714703	0.799361	1
98001192	1728.01	1550.04	1905.97	1.22963	0.298223	0.434854	1
98001193	123.559	109.653	137.464	1.25363	0.326107	0.370787	1
98001194	1.0009	1.13902	0.862774	0.757473	-0.400735	1	1
98001196	0.671985	1.34397	0	0	#NAME?	0.283025	0.996229
98001197	0.316011	0.344431	0.287591	0.834975	-0.260196	1	1
98001200	0	0	0	NA	NA	NA	NA
98001201	47.9659	47.5201	48.4116	1.01876	0.0268146	0.963641	1
98001206	0.344431	0.688862	0	0	#NAME?	0.461988	1
98001208	3050.72	2877.24	3224.21	1.12059	0.164262	0.704534	1
98001210	79.5723	69.627	89.5176	1.28567	0.362524	0.347314	1
98001211	0.287591	0	0.575183	Inf	Inf	0.775644	1
98001212	0.680238	0	1.36048	Inf	Inf	0.304004	1
98001213	0	0	0	NA	NA	NA	NA
98001214	10.379	12.1156	8.64232	0.713322	-0.487374	0.448868	1
98001216	1.59452	0.965783	2.22325	2.30202	1.2029	0.608288	1
98001217	1.77931	2.17231	1.3863	0.63817	-0.647988	0.767398	1
98001218	0.523528	0	1.04706	Inf	Inf	0.530178	1
98001219	0.172216	0.344431	0	0	#NAME?	0.900937	1
98001220	943.021	1021.52	864.525	0.846315	-0.240733	0.497216	1
98001221	462.868	440.196	485.54	1.10301	0.141445	0.692419	1
98001222	55.6844	40.5369	70.8319	1.74735	0.805165	0.190808	0.923726
98001223	2.65499	1.44969	3.86029	2.66283	1.41296	0.379431	1
98001225	260.777	259.287	262.266	1.01149	0.016481	0.911833	1
98001226	0.466014	0.932027	0	0	#NAME?	0.342889	1
98001227	0.856643	0.900309	0.812977	0.902998	-0.147205	1	1
98001228	3.822	2.14301	5.50098	2.56694	1.36005	0.20251	0.9321
98038272	3.81987	7.35215	0.287591	0.0391166	-4.67607	0.00043653	0.072289
98001231	56426.5	42089.9	70763.2	1.68124	0.749526	0.0369685	0.627268
98001232	4.3212	5.38683	3.25556	0.604356	-0.726528	0.51069	1
98001233	2.83429	3.96885	1.69972	0.428265	-1.22342	0.21963	0.946645
98001234	2.10279	2.24224	1.96334	0.875616	-0.19163	0.860212	1
98001235	0	0	0	NA	NA	NA	NA
98001237	4.7127	6.87028	2.55512	0.37191	-1.42697	0.0993363	0.797978
98001242	685.731	666.322	705.139	1.05825	0.0816872	0.873278	1
98001243	50.6863	45.3215	56.0512	1.23675	0.30655	0.556061	1
98001244	39.5978	32.2531	46.9425	1.45544	0.541459	0.225173	0.951055
98001247	691.236	738.439	644.033	0.872155	-0.197344	0.596744	1
98001249	3.97561	4.10388	3.84735	0.937491	-0.0931235	0.940927	1
98001250	0.135496	0	0.270992	Inf	Inf	1	1
98001252	0.225077	0.450154	0	0	#NAME?	0.909019	1
98001253	859.436	927.007	791.866	0.854217	-0.227325	0.474855	1
98001254	0.392646	0	0.785293	Inf	Inf	0.522998	1
98001256	0	0	0	NA	NA	NA	NA
98001258	0.537371	0	1.07474	Inf	Inf	0.401581	1
98001260	0.696426	1.10526	0.287591	0.260202	-1.9423	0.604384	1
98001263	232.091	268.623	195.558	0.728003	-0.457984	0.225995	0.952148
98001264	2.66593	2.90588	2.42599	0.834855	-0.260402	1	1
98001265	1.32706	1.55542	1.09871	0.706378	-0.501488	0.976076	1
98001269	376.086	431.271	320.9	0.744079	-0.426472	0.284478	0.996542
98001270	0.355959	0.450154	0.261764	0.581499	-0.782152	1	1
98001271	0.615145	0.655107	0.575183	0.877998	-0.18771	1	1
98001273	79.7032	77.4512	81.9552	1.05815	0.0815478	0.899481	1
98001274	0.541088	0.794586	0.287591	0.361939	-1.46618	0.852224	1
98001276	33.5198	52.0853	14.9544	0.287114	-1.8003	0.114235	0.827671
98001277	9.83404	11.9127	7.75541	0.651022	-0.619222	0.431806	1
98001279	0.466014	0.932027	0	0	#NAME?	0.41279	1
98001280	1.00642	0.965783	1.04706	1.08415	0.116569	1	1
98001283	5588.24	5918.31	5258.18	0.88846	-0.170621	0.615749	1
98001284	639.419	770.585	508.252	0.659566	-0.600411	0.106135	0.814976
98001286	1790.34	1400.36	2180.33	1.55697	0.638746	0.107502	0.816203
98001287	2.05584	2.24428	1.8674	0.832074	-0.265217	1	1
98001288	0.479927	0.688862	0.270992	0.393391	-1.34596	0.861078	1
98001289	0.499769	0.999538	0	0	#NAME?	0.408698	1
98001290	74.3341	51.0653	97.6029	1.91133	0.93458	0.0783657	0.76026
98001292	36.7434	36.2891	37.1978	1.02504	0.0356823	0.886786	1
98001293	0	0	0	NA	NA	NA	NA
98001295	0.615423	0.688862	0.541985	0.786782	-0.345964	1	1
98001296	1.35182	2.14505	0.558584	0.260406	-1.94117	0.500957	1
98001297	36.7824	32.6207	40.944	1.25515	0.327865	0.690357	1
98001298	0.549356	0	1.09871	Inf	Inf	0.414527	1
98001299	0.626687	0.965783	0.287591	0.297781	-1.74768	0.582296	1
98001300	0.316011	0.344431	0.287591	0.834975	-0.260196	1	1
98001301	6.11846	4.07216	8.16477	2.00502	1.00362	0.237291	0.962362
98001302	0.851764	1.41594	0.287591	0.20311	-2.29967	0.371439	1
98001303	34.2856	21.4961	47.0751	2.18994	1.13089	0.173872	0.909545
98001304	0.696426	1.10526	0.287591	0.260202	-1.9423	0.593713	1
98001306	97.6225	95.8812	99.3637	1.03632	0.0514707	0.98503	1
98001307	1.9217	1.6884	2.155	1.27635	0.352028	0.976125	1
98001308	5.77695	2.31625	9.23765	3.9882	1.99574	0.030934	0.591778
98001309	0.446893	0.344431	0.549356	1.59496	0.673525	1	1
98001313	0.982943	1.69489	0.270992	0.159887	-2.64487	0.552998	1
98001314	776.474	817.605	735.344	0.899388	-0.152984	0.729414	1
98001315	2.91576	4.5227	1.30882	0.28939	-1.78891	0.361666	1
98001316	0.615145	0.655107	0.575183	0.877998	-0.18771	1	1
98001317	666.513	733.46	599.567	0.81745	-0.290798	0.476007	1
98001318	1.01176	0.688862	1.33465	1.93747	0.954172	0.810532	1
98001319	0.978682	1.38218	0.575183	0.416141	-1.26486	0.553302	1
98001321	2.84524	3.14459	2.5459	0.809612	-0.304697	0.965581	1
98001322	1.08079	1.35046	0.81112	0.600623	-0.735468	1	1
98001323	0	0	0	NA	NA	NA	NA
98001325	0.996456	0.621352	1.37156	2.20738	1.14234	0.811636	1
98001326	0.905315	0.450154	1.36048	3.02224	1.59562	0.669622	1
98001329	2.63893	3.89892	1.37893	0.35367	-1.49952	0.208153	0.938626
98001330	0	0	0	NA	NA	NA	NA
98001332	1.51702	0.344431	2.68961	7.80885	2.96511	0.142093	0.864965
98001333	1.52002	1.41594	1.6241	1.14701	0.19788	1	1
98001334	0	0	0	NA	NA	NA	NA
98001335	0.775818	0.688862	0.862774	1.25246	0.324767	1	1
98001336	65.8116	53.5075	78.1156	1.4599	0.545869	0.196191	0.927955
98001337	3.36815	4.27711	2.45919	0.574965	-0.798455	0.473752	1
98001338	1.69683	1.21098	2.18268	1.8024	0.84992	0.567042	1
98001339	268.422	250.69	286.153	1.14146	0.190883	0.694363	1
98001340	4.18605	5.07412	3.29799	0.649964	-0.621569	0.505798	1
98001341	0.834887	1.38218	0.287591	0.208071	-2.26486	0.389341	1
98001342	27.7411	41.2986	14.1836	0.343441	-1.54186	0.0260798	0.56183
98001343	5.16917	1.58917	8.74918	5.5055	2.46087	0.0177476	0.488616
98001344	0.77669	1.55338	0	0	#NAME?	0.348434	1
98001345	183.847	128.45	239.245	1.86255	0.89728	0.137458	0.859698
98001346	1.33601	1.52166	1.15037	0.755993	-0.403555	0.978489	1
98001347	0.793567	1.58713	0	0	#NAME?	0.261974	0.983666
98001348	1.15812	2.31625	0	0	#NAME?	0.0700747	0.743225
98001350	640.797	662.175	619.419	0.935432	-0.0962959	0.737024	1
98001355	4.5039	2.48744	6.52036	2.62131	1.39029	0.166199	0.89899
98001357	969.652	904.931	1034.37	1.14304	0.192876	0.52526	1
98001358	4.64611	4.35353	4.93869	1.13441	0.18194	0.929105	1
98001359	2.01127	1.58917	2.43336	1.53121	0.614675	0.677977	1
98001362	0.677481	0	1.35496	Inf	Inf	0.600593	1
98001363	0.327553	0.655107	0	0	#NAME?	0.523747	1
98001364	0.310676	0.621352	0	0	#NAME?	0.585898	1
98001365	0.172216	0.344431	0	0	#NAME?	0.893821	1
98001368	1.8922	1.9336	1.85081	0.95718	-0.0631375	1	1
98001370	1353.15	1146.55	1559.75	1.36039	0.444018	0.225117	0.951055
98001371	3.97467	6.03951	1.90983	0.316223	-1.66099	0.429533	1
98001372	3.31718	4.93464	1.69972	0.344447	-1.53765	0.140773	0.862697
98001373	1.13437	1.48345	0.785293	0.52937	-0.917652	0.784148	1
98001374	1.51219	1.89985	1.12454	0.59191	-0.756551	0.763209	1
98001378	1.74691	1.24474	2.24908	1.80686	0.853488	0.662356	1
98001381	2.29681	3.52074	1.07288	0.304733	-1.71438	0.189461	0.92178
98001382	202.938	219.985	185.891	0.845016	-0.242949	0.598075	1
98001383	0.635265	0.999538	0.270992	0.271118	-1.88301	0.6184	1
98001384	0.172216	0.344431	0	0	#NAME?	0.895467	1
98001385	3.09638	5.0424	1.15037	0.228139	-2.13202	0.0619731	0.722415
98001386	0.299134	0.310676	0.287591	0.925696	-0.11139	1	1
98001387	16.1027	15.7782	16.4271	1.04113	0.0581436	1	1
98001388	0.46305	0.655107	0.270992	0.413661	-1.27348	0.825577	1
98001389	1509.24	2104.48	914.008	0.434316	-1.20318	0.00102499	0.121839
98001390	25.6738	25.4837	25.864	1.01492	0.021372	0.907208	1
98001391	241.641	289.164	194.119	0.67131	-0.574949	0.165194	0.897704
98001392	0.570126	0.310676	0.829576	2.67023	1.41696	0.885025	1
98001393	277.947	241.822	314.072	1.29877	0.377151	0.300615	1
98001394	5.64182	7.86574	3.4179	0.43453	-1.20247	0.156939	0.887295
98001398	117.266	78.2972	156.235	1.99541	0.996684	0.0331785	0.605999
98001401	0.982943	1.69489	0.270992	0.159887	-2.64487	0.445009	1
98001403	477.139	540.911	413.366	0.764202	-0.387973	0.291051	1
98001404	0.287591	0	0.575183	Inf	Inf	0.723768	1
98001405	84.8724	77.4083	92.3365	1.19285	0.254413	0.569929	1
98001409	2.21916	3.86313	0.575183	0.14889	-2.74768	0.0503748	0.679785
98001412	500.9	419.432	582.368	1.38847	0.473496	0.236912	0.961796
98001413	0	0	0	NA	NA	NA	NA
98001414	0.225077	0.450154	0	0	#NAME?	0.918038	1
98001415	457.783	401.952	513.613	1.2778	0.353659	0.323133	1
98001416	320.896	264.646	377.145	1.42509	0.511053	0.174048	0.909848
98001418	256.663	326.474	186.851	0.57233	-0.80508	0.0319829	0.598379
98001419	487.141	574.326	399.956	0.696393	-0.522026	0.149833	0.877422
98001420	3.56843	5.17538	1.96148	0.379003	-1.39972	0.129679	0.849118
98001421	0.488227	0.688862	0.287591	0.417487	-1.2602	0.881319	1
98001422	269.54	253.292	285.788	1.1283	0.174147	0.704266	1
98001424	1174.69	908.066	1441.32	1.58724	0.666517	0.0612516	0.719085
98001426	32.0416	27.6413	36.4418	1.31838	0.398767	0.441613	1
98001427	2380.03	2409.87	2350.18	0.975232	-0.0361819	0.854593	1
98001429	7.60748	5.27665	9.93831	1.88345	0.913379	0.365684	1
98001432	0.225077	0.450154	0	0	#NAME?	0.899057	1
98001434	0	0	0	NA	NA	NA	NA
98001435	675.514	543.393	807.636	1.48628	0.57171	0.22508	0.951055
98001439	12.3566	13.5694	11.1439	0.821257	-0.284094	0.756985	1
98001440	0.155338	0.310676	0	0	#NAME?	0.924174	1
98001442	0.450154	0.900309	0	0	#NAME?	0.467911	1
98001444	1.19913	1.58713	0.81112	0.511059	-0.968437	0.617173	1
98001445	2.87754	3.52074	2.23433	0.634621	-0.656032	0.588196	1
98001447	0.724846	1.44969	0	0	#NAME?	0.326697	1
98001448	383.671	508.195	259.148	0.509938	-0.971605	0.0182341	0.495072
98001449	0.143796	0	0.287591	Inf	Inf	1	1
98001450	0.652143	1.03329	0.270992	0.262261	-1.93093	0.535662	1
98001451	0.512668	0.450154	0.575183	1.27775	0.3536	1	1
98001453	207.828	243.192	172.464	0.709168	-0.4958	0.163058	0.895323
98001454	637.702	866.775	408.63	0.471437	-1.08486	0.00541528	0.288609
98001455	0.832658	1.37772	0.287591	0.208744	-2.2602	0.368274	1
98001456	3.95969	4.86471	3.05468	0.627927	-0.67133	0.523047	1
98001457	0.773725	1.27646	0.270992	0.2123	-2.23582	0.493568	1
98001459	1.83206	1.72661	1.93752	1.12215	0.166263	1	1
98001460	111.188	143.595	78.7808	0.548633	-0.866086	0.0535412	0.689633
98001461	0.466014	0.932027	0	0	#NAME?	0.326467	1
98001462	0.225077	0.450154	0	0	#NAME?	0.914342	1
98001464	320.855	278.37	363.341	1.30524	0.384321	0.27742	0.993923
98001467	123.215	135.94	110.49	0.81279	-0.299046	0.489451	1
98001470	0.847447	1.69489	0	0	#NAME?	0.261797	0.983666
98001471	2.17624	0.794586	3.5579	4.47768	2.16275	0.198095	0.929543
98001473	308.441	324.311	292.571	0.902132	-0.14859	0.772611	1
98001474	0.532789	0.794586	0.270992	0.341049	-1.55195	0.856495	1
98001476	5594.25	6124.95	5063.55	0.826709	-0.274548	0.435365	1
98001477	1.09535	1.37772	0.812977	0.590087	-0.761001	0.831053	1
98001479	640.266	507.119	773.412	1.52511	0.608913	0.104614	0.811674
98001480	0.344431	0.688862	0	0	#NAME?	0.503554	1
98001481	26.7883	21.2326	32.344	1.52332	0.60722	0.33092	1
98001487	0.766166	1.24474	0.287591	0.231045	-2.11375	0.576089	1
98001489	0.143796	0	0.287591	Inf	Inf	1	1
98001490	92.7784	76.79	108.767	1.41642	0.502248	0.271493	0.990965
98001491	0	0	0	NA	NA	NA	NA
98001492	0.406488	0	0.812977	Inf	Inf	0.558936	1
98001493	419.788	471.746	367.83	0.779721	-0.35897	0.309483	1
98001494	1.09304	1.13902	1.04706	0.919264	-0.121449	1	1
98001498	5019.99	4285.78	5754.2	1.34263	0.425058	0.276734	0.993261
98001499	278.222	174.483	381.961	2.1891	1.13034	0.0728611	0.752077
98001500	3.30026	6.04194	0.558584	0.0924511	-3.43517	0.0132397	0.432878
98001501	280.088	247.968	312.209	1.25907	0.332358	0.381004	1
98001502	0.392646	0	0.785293	Inf	Inf	0.568734	1
98001503	0.707969	1.41594	0	0	#NAME?	0.302535	1
98001504	131.048	83.4993	178.597	2.13891	1.09687	0.0129486	0.429166
98001505	98.4648	102.827	94.1025	0.915153	-0.127916	0.738587	1
98001507	109.331	109.995	108.667	0.987924	-0.0175274	0.947758	1
98001509	0.569508	1.13902	0	0	#NAME?	0.352519	1
98001510	31.972	30.8164	33.1276	1.075	0.104335	0.758712	1
98001512	2.38568	2.03933	2.73204	1.33968	0.421884	0.755537	1
98001514	981.566	1275.02	688.112	0.539687	-0.889805	0.0166607	0.474598
98001515	183.883	147.006	220.76	1.50171	0.586603	0.250257	0.972949
98001517	1542.77	1444.84	1640.71	1.13557	0.183417	0.650764	1
98001518	0.143796	0	0.287591	Inf	Inf	1	1
98001519	0.585651	0.900309	0.270992	0.300999	-1.73217	0.869811	1
98001520	16.3909	11.1669	21.6149	1.93563	0.952801	0.175999	0.911117
98001521	359.242	425.273	293.211	0.689464	-0.536453	0.201492	0.931227
98001522	342.693	274.478	410.907	1.49705	0.582118	0.145005	0.869451
98001524	0.225077	0.450154	0	0	#NAME?	0.901935	1
98001527	18.455	20.3002	16.6099	0.818214	-0.289451	0.632884	1
98001529	3140.57	4385.15	1896	0.432368	-1.20967	0.000726522	0.101726
98001532	44.6469	26.0717	63.2221	2.42494	1.27795	0.208812	0.938793
98001533	106.146	104.963	107.329	1.02254	0.0321539	0.934863	1
98001534	12.7895	16.2638	9.31513	0.572753	-0.804015	0.214278	0.941438
98001536	1.16021	2.03283	0.287591	0.141473	-2.8214	0.222712	0.949475
98001538	2.70174	3.72773	1.67575	0.449537	-1.15349	0.402522	1
98001539	343.373	297.91	388.836	1.30521	0.384284	0.27077	0.990965
98001540	10.3717	11.1518	9.59164	0.860094	-0.217433	0.770044	1
98001541	9.55542	7.66282	11.448	1.49397	0.579149	0.544102	1
98001542	0.414788	0	0.829576	Inf	Inf	0.587105	1
98001545	0.589968	0.621352	0.558584	0.898981	-0.153637	1	1
98001547	15.8384	13.9943	17.6825	1.26355	0.337486	0.443891	1
98001548	301.047	264.248	337.847	1.27852	0.354476	0.373659	1
98001549	5.39777	4.28806	6.50747	1.51758	0.601772	0.466158	1
98001550	602.526	828.905	376.146	0.453786	-1.13992	0.00216949	0.182784
98001551	240.685	219.592	261.778	1.19211	0.253518	0.54505	1
98001553	0.299134	0.310676	0.287591	0.925696	-0.11139	1	1
98001556	3681.87	4282.15	3081.58	0.719633	-0.474667	0.177261	0.912974
98001557	902.695	1010.22	795.166	0.787118	-0.345347	0.320922	1
98001558	0.225077	0.450154	0	0	#NAME?	0.91256	1
98001559	1.79117	1.07151	2.51084	2.34328	1.22853	0.523967	1
98001560	1.67681	1.72216	1.63147	0.94734	-0.0780452	1	1
98001561	52.3453	65.3304	39.3603	0.60248	-0.731015	0.102714	0.806895
98001563	1.20015	1.58917	0.81112	0.510404	-0.970288	0.868978	1
98001566	1.29587	0.965783	1.62595	1.68356	0.751516	0.903041	1
98001567	3.48228	2.00557	4.959	2.47261	1.30604	0.269926	0.99005
98001568	4.11915	1.76037	6.47793	3.67987	1.87966	0.0788579	0.760788
98018485	7.17992	13.8105	0.549356	0.0397782	-4.65188	2.51e-05	0.00976173
98001572	2.54608	2.03933	3.05283	1.49698	0.582053	0.666883	1
98001573	57.0582	64.8554	49.2611	0.759552	-0.39678	0.397132	1
98001574	8652.96	7336.58	9969.35	1.35886	0.442393	0.348008	1
98001575	0.172216	0.344431	0	0	#NAME?	0.900294	1
98001576	589.173	542.952	635.394	1.17026	0.226827	0.539087	1
98001577	476.976	367.261	586.691	1.59748	0.675796	0.159135	0.890325
98001579	15.43	21.6868	9.17322	0.422986	-1.24132	0.0275489	0.576641
98001581	0	0	0	NA	NA	NA	NA
98001584	0.707969	1.41594	0	0	#NAME?	0.182846	0.916078
98001586	23.4019	21.8246	24.9792	1.14454	0.194769	0.829016	1
98001587	10.0374	14.88	5.19494	0.349123	-1.51819	0.0156009	0.462032
98001588	3843.05	3343.57	4342.53	1.29877	0.377146	0.298481	1
98001590	274.753	205.609	343.897	1.67257	0.742069	0.0466067	0.666007
98001592	19.8306	18.1149	21.5464	1.18943	0.250271	0.737744	1
98001594	1.24149	2.48299	0	0	#NAME?	0.0348192	0.614943
98001595	156.488	153.213	159.764	1.04276	0.0604046	0.84711	1
98001596	1.10333	0	2.20665	Inf	Inf	0.204714	0.934784
98001597	184.697	167.991	201.404	1.1989	0.26171	0.506303	1
98001598	1.77553	2.24224	1.30882	0.583711	-0.776674	0.706732	1
98001602	0.765147	1.2427	0.287591	0.231424	-2.11139	0.493596	1
98001603	29.692	23.6224	35.7615	1.51388	0.598251	0.294166	1
98001604	496.547	472.421	520.673	1.10214	0.140306	0.690683	1
98001606	3.16897	0	6.33793	Inf	Inf	0.00733425	0.329752
98001607	2922.96	3219.32	2626.61	0.815889	-0.293555	0.36856	1
98001608	71.6144	70.9165	72.3123	1.01968	0.0281212	0.861967	1
98001611	0.143796	0	0.287591	Inf	Inf	1	1
98001613	84.5273	90.1227	78.9318	0.875826	-0.191283	0.724482	1
98001614	0.406488	0	0.812977	Inf	Inf	0.645426	1
98001617	1736.7	1601.09	1872.31	1.16939	0.225759	0.565776	1
98001618	0.130882	0	0.261764	Inf	Inf	1	1
98001619	1.50756	1.65465	1.36048	0.822216	-0.282411	0.931652	1
98001620	346.855	478.826	214.883	0.448771	-1.15595	0.00251543	0.200295
98001621	0.172216	0.344431	0	0	#NAME?	0.909039	1
98001622	257.038	262.354	251.722	0.959477	-0.0596798	0.809823	1
98001624	192.062	137.853	246.272	1.78648	0.837119	0.0834315	0.769471
98001625	1.885	1.58917	2.18082	1.3723	0.456598	0.789713	1
98001627	0.75092	0.688862	0.812977	1.18017	0.238999	1	1
98001628	1.14793	1.44969	0.846175	0.583693	-0.776719	0.795352	1
98001629	3.6397	3.93714	3.34227	0.84891	-0.236317	0.871578	1
98001630	1.26328	0.310676	2.21588	7.13245	2.8344	0.225094	0.951055
98001632	26.859	27.2567	26.4612	0.970817	-0.0427286	0.8852	1
98001635	0.287591	0	0.575183	Inf	Inf	0.773308	1
98001636	5.58804	4.55607	6.62001	1.45301	0.539044	0.631071	1
98001637	13.4813	18.0603	8.90228	0.492919	-1.02058	0.0766813	0.758887
98001638	19.3942	9.73145	29.0569	2.98587	1.57815	0.0844171	0.772709
98001639	0.454471	0.621352	0.287591	0.462848	-1.11139	0.862436	1
98001640	0.225077	0.450154	0	0	#NAME?	0.923855	1
98001641	0.840222	1.10526	0.575183	0.520404	-0.942296	0.83027	1
98001644	0.143796	0	0.287591	Inf	Inf	1	1
98001645	495.154	530.091	460.216	0.868183	-0.20393	0.554028	1
98001652	424.673	494.53	354.816	0.717481	-0.478987	0.224117	0.950939
98001653	1949.45	1871.56	2027.35	1.08324	0.115352	0.714496	1
98001654	22.0564	26.3823	17.7305	0.67206	-0.573338	0.309324	1
98001655	60.1186	75.5606	44.6767	0.59127	-0.758111	0.218312	0.945488
98001656	1.26127	0.900309	1.62224	1.80187	0.849495	0.593233	1
98001657	3.14552	1.89985	4.39119	2.31134	1.20873	0.31223	1
98001658	0.541088	0.794586	0.287591	0.361939	-1.46618	0.854029	1
98001659	1.19481	1.86609	0.523528	0.280548	-1.83368	0.496268	1
98001662	727.569	750.148	704.989	0.9398	-0.0895747	0.798339	1
98001663	7.72999	6.76252	8.69747	1.28613	0.363035	0.773636	1
98001664	1633.42	1835.3	1431.53	0.780002	-0.35845	0.364223	1
98001665	3043.78	2667.78	3419.77	1.28188	0.358259	0.300522	1
98001666	5.2493	7.50665	2.99194	0.398572	-1.32709	0.497102	1
98001667	1.08218	1.58917	0.575183	0.361939	-1.46618	0.630695	1
98001668	4.31916	5.38275	3.25556	0.604814	-0.725437	0.329741	1
98001669	0.307712	0.344431	0.270992	0.786782	-0.345964	1	1
98001670	0	0	0	NA	NA	NA	NA
98001671	4.33743	5.15016	3.5247	0.684387	-0.547116	0.758483	1
98001672	0	0	0	NA	NA	NA	NA
98001673	758.602	540.381	976.822	1.80765	0.854118	0.0970217	0.7946
98001674	15.3866	22.1622	8.61098	0.388544	-1.36385	0.0141649	0.443293
98001676	0.618388	0.965783	0.270992	0.280593	-1.83345	0.695278	1
98001678	597.86	724.727	470.993	0.649891	-0.621731	0.0832878	0.769471
98001680	2.26008	2.62692	1.89323	0.720704	-0.472522	0.85333	1
98001681	1.07494	0.450154	1.69972	3.77586	1.91681	0.464228	1
98001683	448.334	536.716	359.952	0.670656	-0.576355	0.111775	0.824611
98001684	0.155338	0.310676	0	0	#NAME?	0.895139	1
98001685	1.29757	1.80062	0.794521	0.441249	-1.18034	0.821628	1
98001686	677.685	659.192	696.178	1.05611	0.0787585	0.849654	1
98001688	0.615145	0.655107	0.575183	0.877998	-0.18771	1	1
98001689	633.093	626.614	639.573	1.02068	0.0295326	0.849405	1
98001690	0.927456	0.450154	1.40476	3.12061	1.64183	0.495787	1
98001691	1.35085	1.65465	1.04706	0.632799	-0.660182	0.751529	1
98001693	4.47786	4.04286	4.91286	1.21519	0.281187	0.816054	1
98001696	1.09372	1.89985	0.287591	0.151376	-2.72379	0.244478	0.970159
98001698	0.397293	0.794586	0	0	#NAME?	0.555281	1
98001699	0.155338	0.310676	0	0	#NAME?	0.916871	1
98001700	5.25274	6.56406	3.94143	0.600456	-0.73587	0.381542	1
98001704	1.61037	2.93314	0.287591	0.0980489	-3.35035	0.0738209	0.753832
98001705	0.327553	0.655107	0	0	#NAME?	0.517476	1
98001707	147.22	159.949	134.491	0.840834	-0.250107	0.552139	1
98001708	2.8522	4.55403	1.15037	0.252604	-1.98505	0.0905989	0.783595
98001710	1597.29	1890	1304.58	0.690252	-0.534804	0.153765	0.883551
98001711	2.01522	3.45526	0.575183	0.166466	-2.5867	0.0993863	0.797978
98001712	341.619	337.645	345.592	1.02354	0.0335629	0.959496	1
98001713	0.779061	0.999538	0.558584	0.558842	-0.839488	0.831524	1
98001715	90.085	75.4054	104.765	1.38935	0.474411	0.219388	0.946645
98001717	1227.8	1101.07	1354.54	1.23021	0.298905	0.510622	1
98001720	0.143796	0	0.287591	Inf	Inf	1	1
98001722	3.12173	2.1048	4.13865	1.96629	0.975478	0.470374	1
98001725	1.44211	2.62246	0.261764	0.0998161	-3.32458	0.158772	0.889814
98001726	75.9397	74.1307	77.7488	1.04881	0.0687483	0.805909	1
98001727	0.966736	0.344431	1.58904	4.61352	2.20587	0.561584	1
98001729	1.51943	3.03886	0	0	#NAME?	0.0353778	0.618172
98001731	2.43593	4.31329	0.558584	0.129503	-2.94894	0.0240615	0.54349
98001734	1.31087	0.450154	2.17159	4.82411	2.27026	0.26926	0.989556
98001735	384.144	463.134	305.155	0.658891	-0.601887	0.122601	0.84063
98001736	135.202	124.794	145.609	1.16679	0.222551	0.549986	1
98001738	0.475313	0.688862	0.261764	0.379995	-1.39595	0.867876	1
98001740	3791.92	4691.08	2892.75	0.616649	-0.69748	0.0513888	0.682195
98001741	625.075	592.63	657.519	1.10949	0.149902	0.692769	1
98001742	0	0	0	NA	NA	NA	NA
98001743	147.87	125.851	169.889	1.34993	0.432884	0.267086	0.987823
98001744	129.942	135.141	124.743	0.923059	-0.115506	0.784964	1
98001745	3.90091	3.86963	3.9322	1.01617	0.0231421	1	1
98001746	0.172216	0.344431	0	0	#NAME?	0.893893	1
98001751	156.941	141.171	172.71	1.22341	0.290905	0.457185	1
98001752	0.344431	0.688862	0	0	#NAME?	0.556199	1
98001753	3.54526	4.6553	2.43522	0.523107	-0.934823	0.392991	1
98001754	181.961	142.228	221.694	1.55872	0.640362	0.110728	0.822757
98001755	0.679549	1.07151	0.287591	0.268399	-1.89755	0.54449	1
98001758	0.172216	0.344431	0	0	#NAME?	0.910731	1
98001759	14.4726	12.2176	16.7276	1.36914	0.453267	0.565084	1
98001760	5.82213	7.00975	4.6345	0.661149	-0.596952	0.539415	1
98001764	4.89007	2.34351	7.43664	3.1733	1.66598	0.132458	0.85184
98001765	13.5964	8.76363	18.4292	2.10292	1.07239	0.220389	0.946735
98001766	1.19222	1.52166	0.862774	0.566995	-0.818592	0.841431	1
98001767	57.773	76.547	38.9991	0.509479	-0.972906	0.0652666	0.733797
98001768	0	0	0	NA	NA	NA	NA
98001769	0.76083	1.52166	0	0	#NAME?	0.229171	0.955234
98001770	698.453	577.65	819.257	1.41826	0.504122	0.165433	0.898551
98001771	0.552631	1.10526	0	0	#NAME?	0.268439	0.988941
98001773	855.707	671.003	1040.41	1.55053	0.632763	0.101027	0.802142
98001774	597.126	462.41	731.842	1.58267	0.662359	0.0656788	0.734397
98001777	7.2023	10.6366	3.76801	0.354249	-1.49716	0.0521073	0.683389
98001778	0.581668	0.621352	0.541985	0.872267	-0.197158	1	1
98001780	184.058	158.431	209.684	1.3235	0.404359	0.273031	0.991854
98001781	133.912	175.031	92.7936	0.530156	-0.915512	0.0230697	0.535828
98001782	3974.54	5775.89	2173.19	0.376252	-1.41023	0.00253656	0.201195
98001784	102.328	101.025	103.631	1.02579	0.0367309	0.877243	1
98001786	1.68231	0.450154	2.91446	6.47436	2.69474	0.169418	0.903429
98001787	681.178	832.291	530.065	0.636874	-0.65092	0.0591495	0.710693
98001788	0.155338	0.310676	0	0	#NAME?	0.903979	1
98001789	1.5592	1.10526	2.01314	1.82141	0.865059	0.732203	1
98001791	82.5126	80.3751	84.6501	1.05319	0.0747631	0.872914	1
98001792	88.1304	83.1388	93.122	1.12008	0.1636	0.690761	1
98001793	0.368873	0.450154	0.287591	0.638873	-0.6464	1	1
98001795	1301.47	1564.69	1038.25	0.663553	-0.591716	0.0802522	0.762336
98001797	0.482891	0.965783	0	0	#NAME?	0.369508	1
98001800	46.0776	48.5515	43.6037	0.898091	-0.155066	0.753848	1
98001801	7.06609	4.34704	9.78515	2.25099	1.17056	0.187764	0.921016
98001803	84.6014	75.9264	93.2764	1.22851	0.296911	0.469798	1
98001806	0.442929	0.310676	0.575183	1.85139	0.88861	1	1
98001807	15.6097	12.0729	19.1464	1.5859	0.6653	0.310486	1
98001808	0.43398	0.344431	0.523528	1.51998	0.604052	1	1
98001810	859.816	876.584	843.048	0.961743	-0.0562764	0.878579	1
98001811	0	0	0	NA	NA	NA	NA
98001812	137.085	175.815	98.3551	0.559424	-0.837986	0.0368431	0.626534
98001814	3431.82	4476.97	2386.66	0.533098	-0.907528	0.0247524	0.551523
98001816	30.4095	23.3796	37.4393	1.60136	0.6793	0.162065	0.8938
98001817	14.9288	15.1947	14.663	0.965004	-0.0513927	0.993228	1
98001819	0	0	0	NA	NA	NA	NA
98001821	1444.77	1808.03	1081.51	0.598173	-0.741365	0.0377441	0.631581
98001823	0.798206	0	1.59641	Inf	Inf	0.487401	1
98001824	0	0	0	NA	NA	NA	NA
98001825	9.41326	10.1861	8.64046	0.848263	-0.237416	0.769425	1
98001828	1.76706	2.38376	1.15037	0.482585	-1.05115	0.594423	1
98001830	1.0927	1.89781	0.287591	0.151538	-2.72224	0.270205	0.990446
98001831	209	202.508	215.492	1.06412	0.0896597	0.834806	1
98001832	1.26593	2.24428	0.287591	0.128144	-2.96416	0.136487	0.857498
98001837	0	0	0	NA	NA	NA	NA
98001840	372.599	348.603	396.595	1.13767	0.186078	0.649439	1
98001842	1.07252	2.14505	0	0	#NAME?	0.123105	0.84064
98001844	0.512668	0.450154	0.575183	1.27775	0.3536	1	1
98001848	0.598267	0.621352	0.575183	0.925696	-0.11139	1	1
98001850	2.36857	3.61997	1.11717	0.308613	-1.69613	0.179679	0.91444
98001851	3.25113	4.52231	1.97994	0.437816	-1.1916	0.309192	1
98001852	3.55187	4.13763	2.96612	0.716863	-0.48023	0.691918	1
98001853	249.829	224.843	274.814	1.22225	0.289536	0.486941	1
98001855	0	0	0	NA	NA	NA	NA
98001858	0.62237	1.24474	0	0	#NAME?	0.381574	1
98001859	19.1036	22.4456	15.7617	0.702217	-0.510012	0.364996	1
98001863	1.93826	2.72615	1.15037	0.421974	-1.24477	0.380768	1
98001864	0.621352	1.2427	0	0	#NAME?	0.256946	0.979091
98001865	0.569476	0.344431	0.794521	2.30676	1.20587	0.914032	1
98001866	3.61584	4.48856	2.74312	0.611137	-0.710433	0.579476	1
98001868	1364.67	1492.49	1236.86	0.828719	-0.271045	0.403443	1
98001871	314.636	281.924	347.348	1.23206	0.301078	0.411816	1
98001872	0.535753	1.07151	0	0	#NAME?	0.397329	1
98001874	36.1043	36.4842	35.7243	0.979173	-0.030365	0.885386	1
98001878	54.2633	64.2166	44.31	0.690009	-0.535313	0.216644	0.944428
98001881	0.172216	0.344431	0	0	#NAME?	0.902743	1
98001883	0.632022	0.688862	0.575183	0.834975	-0.260196	1	1
98001885	0.471349	0.655107	0.287591	0.438999	-1.18771	0.857238	1
98001886	0.307712	0.344431	0.270992	0.786782	-0.345964	1	1
98001888	642.469	709.26	575.679	0.811661	-0.301051	0.368939	1
98001889	0.932027	1.86405	0	0	#NAME?	0.216107	0.943755
98001890	2.55552	2.9376	2.17345	0.739874	-0.434648	0.835844	1
98001891	0.695744	0.344431	1.04706	3.03996	1.60405	0.813815	1
98001892	2.85651	0.794586	4.91843	6.18993	2.62992	0.167651	0.9009
98001893	1184.86	1266.08	1103.65	0.871711	-0.198078	0.561271	1
98001894	0	0	0	NA	NA	NA	NA
98001895	31.2837	28.8742	33.6932	1.16689	0.222674	0.616207	1
98001897	1.14867	1.72216	0.575183	0.33399	-1.58212	0.73392	1
98001899	1.12809	1.13902	1.11717	0.980817	-0.0279437	1	1
98001901	49.25	48.2821	50.2179	1.04009	0.0567132	1	1
98001902	2.37177	0.450154	4.29339	9.5376	3.25363	0.0655525	0.73412
98001903	405.162	264.89	545.434	2.05909	1.04201	0.0675123	0.738653
98001905	229.714	203.262	256.166	1.26027	0.333738	0.364715	1
98001907	0	0	0	NA	NA	NA	NA
98001908	306.352	272.809	339.895	1.24591	0.317199	0.429119	1
98001909	0.225077	0.450154	0	0	#NAME?	0.896732	1
98001911	0.926085	0.76083	1.09134	1.43441	0.520454	0.97287	1
98001913	1189.41	1029.04	1349.79	1.3117	0.391439	0.282696	0.996229
98001914	1.34022	0.794586	1.88586	2.37339	1.24695	0.565447	1
98001915	1187.51	1264.89	1110.14	0.877658	-0.188268	0.599065	1
98001916	64.69	50.4444	78.9356	1.5648	0.645982	0.133315	0.853476
98001917	90.5151	56.8066	124.224	2.18678	1.12881	0.0049359	0.274714
98001918	15.9739	6.08015	25.8677	4.25446	2.08897	0.0805007	0.763094
98001920	45.586	37.4439	53.7282	1.4349	0.52095	0.233608	0.959305
98001923	0.287591	0	0.575183	Inf	Inf	0.757942	1
98001925	164.632	159.07	170.194	1.06993	0.097512	0.741365	1
98001926	2089.22	2121.19	2057.26	0.969861	-0.0441501	0.895935	1
98001927	3.12056	3.41501	2.82612	0.827556	-0.273071	0.813403	1
98001928	15.6679	14.1952	17.1407	1.2075	0.272023	0.706558	1
98001929	1.27278	0.344431	2.20114	6.39064	2.67596	0.233264	0.959272
98001930	0.225077	0.450154	0	0	#NAME?	0.88898	1
98001931	1.88033	2.38172	1.37893	0.578965	-0.788453	0.626629	1
98001932	1.68924	0.76083	2.61764	3.44051	1.78262	0.350724	1
98001933	2.45281	4.34704	0.558584	0.128497	-2.96019	0.250168	0.972949
98001934	14.5282	12.3986	16.6577	1.34351	0.426009	0.438093	1
98001937	2.11668	3.65818	0.575183	0.157232	-2.66903	0.0338031	0.607211
98001938	0.172216	0.344431	0	0	#NAME?	0.897484	1
98001939	1.16334	1.2427	1.08397	0.872267	-0.197158	0.977096	1
98001940	2.44951	4.62803	0.270992	0.0585545	-4.09408	0.0128026	0.426626
98001941	715.561	743.495	687.627	0.924858	-0.112697	0.828159	1
98001945	4.26552	3.31578	5.21525	1.57286	0.653386	0.543328	1
98001947	3.02833	3.58825	2.46841	0.687916	-0.539695	0.685669	1
98001948	59.0272	66.4884	51.5659	0.775563	-0.366684	0.346341	1
98001949	931.837	1010.6	853.073	0.844123	-0.244474	0.490582	1
98001950	23.4768	24.0002	22.9533	0.956378	-0.0643466	1	1
98001951	63.6268	28.3883	98.8653	3.48261	1.80017	0.00120062	0.130228
98001954	0.397293	0.794586	0	0	#NAME?	0.455726	1
98001955	0.143796	0	0.287591	Inf	Inf	1	1
98001956	3.87796	3.87166	3.88426	1.00325	0.00468618	1	1
98001957	1.25199	1.69286	0.81112	0.479142	-1.06147	0.652233	1
98001958	0.660442	1.03329	0.287591	0.278325	-1.84516	0.730612	1
98001959	0.475313	0.688862	0.261764	0.379995	-1.39595	0.890294	1
98001960	0.941313	1.07151	0.81112	0.75699	-0.401653	1	1
98001962	0.488227	0.688862	0.287591	0.417487	-1.2602	0.838404	1
98001964	5.49947	5.98092	5.01802	0.839006	-0.253248	0.879887	1
98001965	54.6318	58.6195	50.6442	0.863948	-0.210983	0.681312	1
98001966	4101.21	3763.56	4438.86	1.17943	0.238092	0.548433	1
98001969	4.69795	4.56052	4.83538	1.06027	0.084429	0.921259	1
98001972	2.36973	2.00557	2.73389	1.36315	0.446944	0.758422	1
98001975	704.276	730.023	678.529	0.929462	-0.105532	0.833008	1
98001976	0	0	0	NA	NA	NA	NA
98001977	505.406	573.226	437.586	0.763374	-0.389537	0.2826	0.996229
98001979	0.62237	1.24474	0	0	#NAME?	0.302177	1
98001983	0.225077	0.450154	0	0	#NAME?	0.920475	1
98001984	248.122	211.028	285.216	1.35155	0.434618	0.247035	0.970756
98001985	0.155338	0.310676	0	0	#NAME?	0.909555	1
98001987	232.371	291.631	173.111	0.593595	-0.75245	0.427243	1
98001988	2.34968	1.79412	2.90523	1.61931	0.695375	0.708936	1
98001991	1.48765	1.58713	1.38816	0.874633	-0.193251	0.9236	1
98001993	19808	16810.7	22805.3	1.35659	0.439989	0.240848	0.966689
98001994	0.143796	0	0.287591	Inf	Inf	1	1
98001995	0.928399	1.07151	0.785293	0.732887	-0.448338	1	1
98001996	718.614	965.019	472.209	0.489327	-1.03113	0.00627528	0.309393
98001997	500.877	590.015	411.739	0.697846	-0.51902	0.137816	0.859698
98002004	480.053	555.823	404.282	0.727358	-0.459263	0.18321	0.916078
98002007	0	0	0	NA	NA	NA	NA
98002013	1.12644	1.41594	0.836947	0.59109	-0.758549	0.816381	1
98002014	2189.9	2825.75	1554.05	0.549961	-0.862598	0.0144418	0.447563
98002016	3.30689	0.688862	5.92492	8.60102	3.10451	0.518654	1
98002019	0.747398	0.344431	1.15037	3.3399	1.7398	0.784888	1
98002020	69.7066	48.7433	90.6699	1.86015	0.895419	0.366483	1
98002021	1.24474	2.48948	0	0	#NAME?	0.0857928	0.775006
98002022	30.9378	29.9726	31.903	1.0644	0.0900459	0.783569	1
98002023	1781.89	2382.4	1181.37	0.495876	-1.01195	0.00452179	0.263741
98002024	0.846429	1.69286	0	0	#NAME?	0.237598	0.962796
98002025	92.4956	85.0141	99.9772	1.17601	0.233897	0.563266	1
98002026	0.774447	0.999538	0.549356	0.549609	-0.863521	0.80336	1
98002028	1.0927	1.89781	0.287591	0.151538	-2.72224	0.32441	1
98002029	0.287591	0	0.575183	Inf	Inf	0.774418	1
98002031	521.291	583.369	459.212	0.787171	-0.34525	0.3362	1
98002032	69.4923	84.2592	54.7254	0.649489	-0.622623	0.552742	1
98002033	0.659057	0.794586	0.523528	0.65887	-0.601935	1	1
98002034	0.368873	0.450154	0.287591	0.638873	-0.6464	1	1
98002037	2.2237	3.90542	0.541985	0.138778	-2.84915	0.0690693	0.742054
98002038	0.985907	1.97181	0	0	#NAME?	0.079949	0.761936
98002039	1.92035	2.24428	1.59641	0.711326	-0.491418	0.89123	1
98002040	0.266378	0	0.532757	Inf	Inf	0.741936	1
98002043	4.29048	3.44877	5.1322	1.48812	0.573495	0.620014	1
98002044	126.116	91.2121	161.02	1.76534	0.819942	0.0993278	0.797978
98002047	105.748	100.947	110.55	1.09513	0.131107	0.643794	1
98002048	0.532757	0	1.06551	Inf	Inf	0.45105	1
98002050	2.37444	4.46129	0.287591	0.0644636	-3.95537	0.0777512	0.759914
98002052	0.143796	0	0.287591	Inf	Inf	1	1
98002053	3252.51	3257.18	3247.84	0.997132	-0.00414302	0.966474	1
98002054	7.98797	13.183	2.79292	0.211857	-2.23884	0.00275064	0.211225
98002055	2.16198	4.03636	0.287591	0.0712501	-3.81096	0.0325777	0.60159
98002056	0.307712	0.344431	0.270992	0.786782	-0.345964	1	1
98002058	156.849	155.496	158.202	1.0174	0.0248915	0.978862	1
98002059	143.63	183.206	104.055	0.567964	-0.816128	0.0327416	0.602188
98002060	732.803	506.384	959.222	1.89426	0.921633	0.200426	0.930995
98002061	312.062	382.314	241.81	0.632492	-0.660881	0.0857539	0.775006
98002063	0.671985	1.34397	0	0	#NAME?	0.305992	1
98002064	4.01963	7.17649	0.862774	0.120222	-3.05622	0.0080466	0.345661
98002065	12.7422	17.3987	8.08559	0.464723	-1.10556	0.0521165	0.683389
98002066	1.85191	2.03729	1.66652	0.81801	-0.28981	0.918711	1
98002069	8.5455	12.2888	4.80218	0.390776	-1.35559	0.0598377	0.712977
98002070	240.116	249.308	230.923	0.926258	-0.110514	0.753381	1
98002072	0.968758	0	1.93752	Inf	Inf	0.466549	1
98002073	35.4649	31.1108	39.819	1.27991	0.356045	0.569209	1
98002075	0.310676	0.621352	0	0	#NAME?	0.559944	1
98002076	0.327553	0.655107	0	0	#NAME?	0.48608	1
98002079	0.516647	1.03329	0	0	#NAME?	0.26183	0.983666
98002082	80.7816	82.6401	78.923	0.955021	-0.0663963	0.894333	1
98002083	431.436	294.651	568.221	1.92845	0.947445	0.011224	0.400802
98002084	91.7546	69.1159	114.393	1.6551	0.726916	0.0986296	0.796853
98002085	0.172216	0.344431	0	0	#NAME?	0.894759	1
98002087	10.3508	14.9113	5.79037	0.388322	-1.36468	0.0289426	0.581921
98002088	12.2075	11.2804	13.1346	1.16437	0.219555	0.781495	1
98002089	0.475313	0.688862	0.261764	0.379995	-1.39595	0.87601	1
98002090	0.471349	0.655107	0.287591	0.438999	-1.18771	0.877102	1
98002091	46.3268	39.3457	53.3078	1.35485	0.438138	0.280601	0.995901
98002092	2.80846	3.96885	1.64807	0.41525	-1.26795	0.236546	0.96178
98002096	2.3277	0.655107	4.00029	6.10631	2.6103	0.250544	0.973172
98002099	0.512668	0.450154	0.575183	1.27775	0.3536	1	1
98002101	0.684884	0.794586	0.575183	0.723877	-0.466183	1	1
98002102	1.62225	2.38172	0.862774	0.362248	-1.46495	0.41447	1
98002105	5303.56	4665.18	5941.93	1.27368	0.349	0.378246	1
98002106	1118.95	1096.05	1141.85	1.04179	0.0590701	0.887626	1
98002108	0.380415	0.76083	0	0	#NAME?	0.566436	1
98002112	64.6272	95.6775	33.577	0.350939	-1.51071	0.00103403	0.122037
98002116	76.2837	80.1904	72.377	0.902565	-0.147898	0.833308	1
98002117	0.777708	1.55542	0	0	#NAME?	0.208169	0.938626
98002120	4.03824	3.79969	4.27679	1.12556	0.170647	0.867528	1
98002121	0.721147	0.900309	0.541985	0.601999	-0.732168	1	1
98002122	1.10958	1.93157	0.287591	0.14889	-2.74768	0.201466	0.931227
98002123	3.02267	1.69286	4.35248	2.57108	1.36238	0.589891	1
98002125	1.85192	2.58667	1.11717	0.431894	-1.21125	0.360054	1
98002127	0.287591	0	0.575183	Inf	Inf	0.789257	1
98041801	3.75013	7.21267	0.287591	0.0398731	-4.64844	0.000599731	0.090326
98002129	0.143796	0	0.287591	Inf	Inf	1	1
98002132	1.22857	1.9336	0.523528	0.270753	-1.88495	0.481111	1
98002135	0.135496	0	0.270992	Inf	Inf	1	1
98002136	7.5926	7.07765	8.10754	1.14551	0.195994	0.944119	1
98002140	2.18207	3.28203	1.08211	0.329708	-1.60074	0.347612	1
98002141	0.707969	1.41594	0	0	#NAME?	0.240966	0.966689
98002142	0.310676	0.621352	0	0	#NAME?	0.465488	1
98002143	423.95	452.164	395.736	0.875203	-0.192311	0.514012	1
98002144	0.486841	0.450154	0.523528	1.163	0.217848	1	1
98002145	18.2545	31.4817	5.02725	0.159688	-2.64667	0.00860028	0.35605
98002148	0.172216	0.344431	0	0	#NAME?	0.890367	1
98002149	0.380415	0.76083	0	0	#NAME?	0.54973	1
98002150	0.423087	0	0.846175	Inf	Inf	0.599363	1
98002152	0.949923	1.89985	0	0	#NAME?	0.128886	0.848285
98002153	32.3591	31.733	32.9853	1.03946	0.0558378	0.859068	1
98002154	3.27294	3.14459	3.4013	1.08164	0.113215	0.963485	1
98002155	3.76562	7.00772	0.523528	0.0747074	-3.7426	0.00378788	0.242755
98002156	0.130882	0	0.261764	Inf	Inf	1	1
98002157	27.8255	25.2007	30.4504	1.20832	0.273002	0.567406	1
98002161	0.316011	0.344431	0.287591	0.834975	-0.260196	1	1
98002163	1.0487	1.55542	0.541985	0.34845	-1.52098	0.660874	1
98002164	10.3646	8.69892	12.0303	1.38296	0.467763	0.901324	1
98002166	13.1234	17.7521	8.49473	0.47852	-1.06335	0.122179	0.840238
98002167	0	0	0	NA	NA	NA	NA
98002169	0.270992	0	0.541985	Inf	Inf	0.777927	1
98002171	1.56404	2.00353	1.12454	0.561277	-0.833214	0.601284	1
98002174	0.799135	0	1.59827	Inf	Inf	0.175362	0.910737
98002175	1.3009	2.31421	0.287591	0.124272	-3.00843	0.165483	0.89863
98002176	0.172216	0.344431	0	0	#NAME?	0.921997	1
98002177	0.380415	0.76083	0	0	#NAME?	0.529493	1
98002180	44.5315	61.9121	27.1509	0.438539	-1.18922	0.00604754	0.303946
98002181	1.08511	1.07151	1.09871	1.02539	0.036172	1	1
98002183	762.638	922.86	602.416	0.652771	-0.615352	0.103301	0.807787
98002185	0.550284	0	1.10057	Inf	Inf	0.515239	1
98002187	3.29479	1.03329	5.55629	5.37727	2.42687	0.080204	0.762281
98002188	416.775	372.547	461.003	1.23743	0.307352	0.376349	1
98002191	0.713272	0.344431	1.08211	3.14174	1.65156	0.746619	1
98002192	0.316011	0.344431	0.287591	0.834975	-0.260196	1	1
98002198	1.28179	2.276	0.287591	0.126358	-2.98441	0.173479	0.909341
98002199	0.759219	0.688862	0.829576	1.20427	0.268158	1	1
98002201	425.037	341.053	509.021	1.4925	0.577728	0.119544	0.834666
98002202	5.1714	9.76762	0.575183	0.0588866	-4.08592	0.00082144	0.107662
98002203	37.2889	35.4208	39.1569	1.10548	0.144668	0.764922	1
98002204	0	0	0	NA	NA	NA	NA
98002207	0.225077	0.450154	0	0	#NAME?	0.902342	1
98002209	0.586725	0.310676	0.862774	2.77709	1.47357	0.895721	1
98002210	394.18	328.897	459.463	1.39698	0.482311	0.283463	0.996229
98002211	1554.08	1614.51	1493.65	0.925142	-0.112254	0.725394	1
98002212	0.722221	0.310676	1.13377	3.64935	1.86764	0.693286	1
98002213	3.62518	5.86221	1.38816	0.236798	-2.07827	0.0801368	0.762202
98002216	620.046	752.16	487.931	0.648706	-0.624362	0.0737918	0.753832
98002217	1.03256	1.79412	0.270992	0.151044	-2.72696	0.310051	1
98002218	46.0034	42.8299	49.1769	1.14819	0.199361	0.555578	1
98002220	331.515	270.03	393	1.45539	0.541409	0.152161	0.880241
98002221	0.172216	0.344431	0	0	#NAME?	0.898584	1
98002223	1.99181	1.76037	2.22325	1.26295	0.336792	0.992488	1
98002225	8.14188	4.34908	11.9347	2.74419	1.45638	0.244639	0.970159
98002227	0.459807	0.344431	0.575183	1.66995	0.739804	1	1
98002228	473.373	445.963	500.783	1.12293	0.167263	0.605031	1
98002230	0.316011	0.344431	0.287591	0.834975	-0.260196	1	1
98002231	0.777708	1.55542	0	0	#NAME?	0.2468	0.970749
98002234	412.522	380.645	444.399	1.16749	0.223412	0.572487	1
98002236	79.4832	80.3398	78.6266	0.978675	-0.0310977	0.992524	1
98002237	1.0487	1.55542	0.541985	0.34845	-1.52098	0.673024	1
98002238	0.380415	0.76083	0	0	#NAME?	0.48004	1
98002239	3773.73	4597.25	2950.21	0.641734	-0.639954	0.077008	0.759235
98002240	8.54222	10.8773	6.2071	0.570645	-0.809335	0.436912	1
98002241	1.21903	1.03329	1.40476	1.3595	0.443072	1	1
98002243	1.76557	1.89781	1.63332	0.860637	-0.216524	0.904322	1
98002244	2.73975	4.3808	1.09871	0.250802	-1.99538	0.178208	0.914274
98002245	0.984264	0.344431	1.6241	4.7153	2.23735	0.417716	1
98002246	1.3	0.655107	1.94489	2.96881	1.56988	0.541686	1
98002248	0.225077	0.450154	0	0	#NAME?	0.906045	1
98002250	6.34514	8.28621	4.40407	0.531494	-0.911875	0.245625	0.970249
98002252	2.68042	3.17631	2.18454	0.687761	-0.540022	0.74808	1
98002253	3.09294	4.28157	1.90432	0.444771	-1.16887	0.32776	1
98002257	0.310676	0.621352	0	0	#NAME?	0.512993	1
98001570	3.39207	6.49655	0.287591	0.0442683	-4.49758	0.000563084	0.0869414
98002259	0.725464	0.621352	0.829576	1.33512	0.416964	1	1
98002260	0.155338	0.310676	0	0	#NAME?	0.886866	1
98002261	24.9714	27.4856	22.4572	0.817054	-0.291496	0.610113	1
98002262	243.062	259.167	226.956	0.875713	-0.191469	0.592464	1
98002264	3.51883	5.62554	1.41213	0.251021	-1.99412	0.130963	0.85032
98002266	0.172216	0.344431	0	0	#NAME?	0.904772	1
98002271	2.8698	3.35603	2.38356	0.710232	-0.493638	0.975991	1
98002272	0.316011	0.344431	0.287591	0.834975	-0.260196	1	1
98002276	940.004	1111.72	768.285	0.691076	-0.533083	0.152077	0.880241
98002277	29.7386	39.3463	20.1308	0.511633	-0.966819	0.20176	0.931574
98002278	9121.08	8360.28	9881.88	1.182	0.241234	0.509315	1
98002279	1.70837	1.52166	1.89509	1.24541	0.316619	0.914379	1
98002280	0	0	0	NA	NA	NA	NA
98002281	1.83634	2.58871	1.08397	0.41873	-1.25591	0.627242	1
98002282	0.552631	1.10526	0	0	#NAME?	0.305238	1
98002283	12.5694	15.503	9.63586	0.62155	-0.686058	0.327401	1
98002284	597.73	558.693	636.767	1.13974	0.188711	0.666602	1
98002285	4.23687	4.35353	4.1202	0.946402	-0.0794745	1	1
98002286	6.27645	6.56164	5.99126	0.913073	-0.131197	1	1
98002287	0.499769	0.999538	0	0	#NAME?	0.428937	1
98002288	819.345	1042.55	596.14	0.571809	-0.806394	0.0270644	0.571591
98002289	1.61035	2.38376	0.836947	0.351104	-1.51003	0.529236	1
98002290	10.2386	6.94428	13.533	1.94879	0.96258	0.181836	0.915382
98002291	0.299134	0.310676	0.287591	0.925696	-0.11139	1	1
98002295	124.268	119.039	129.496	1.08785	0.12148	0.751201	1
98002296	0.703322	0.621352	0.785293	1.26385	0.337821	1	1
98002297	0	0	0	NA	NA	NA	NA
98002299	116.326	116.127	116.525	1.00342	0.00493111	0.923931	1
98002301	3.30053	3.622	2.97906	0.822489	-0.281931	0.906344	1
98002303	72.5333	67.6109	77.4557	1.14561	0.196116	0.637459	1
98002304	57.1653	64.8128	49.5179	0.764015	-0.388328	0.395525	1
98002308	551.579	382.127	721.03	1.88688	0.916006	0.0132329	0.432878
98002311	1.41405	1.96532	0.862774	0.438999	-1.18771	0.496918	1
98002312	0.621352	1.2427	0	0	#NAME?	0.517998	1
98002317	325.184	252.265	398.103	1.57811	0.658201	0.0884084	0.779989
98002322	1.33034	2.66068	0	0	#NAME?	0.0834568	0.769471
98002324	0.909961	1.24474	0.575183	0.462091	-1.11375	0.883834	1
98002326	0.143796	0	0.287591	Inf	Inf	1	1
98002327	0.225077	0.450154	0	0	#NAME?	0.905802	1
98002328	1041.27	1180.62	901.92	0.763935	-0.388479	0.263982	0.985576
98002329	2320.94	2247.33	2394.55	1.06551	0.0915455	0.825302	1
98002330	0.528143	0	1.05629	Inf	Inf	0.340621	1
98002331	0.933735	0.794586	1.07288	1.35024	0.43322	0.968651	1
98002332	505.91	576.109	435.711	0.756299	-0.402971	0.315888	1
98002333	0.626687	0.965783	0.287591	0.297781	-1.74768	0.616232	1
98002334	49.7866	47.7731	51.8001	1.08429	0.116756	0.6739	1
98002337	0.155338	0.310676	0	0	#NAME?	0.895284	1
98002338	112.818	88.4405	137.196	1.55128	0.633455	0.124249	0.841046
98002339	0.451507	0.344431	0.558584	1.62176	0.697558	1	1
98002340	5.19519	6.8048	3.58558	0.526919	-0.924346	0.346172	1
98002341	0.552631	1.10526	0	0	#NAME?	0.327306	1
98002343	9.26671	4.93222	13.6012	2.75763	1.46343	0.341168	1
98002346	0	0	0	NA	NA	NA	NA
98002347	13.4052	20.0891	6.7214	0.33458	-1.57958	0.00613304	0.304487
98002348	259.06	239.904	278.217	1.1597	0.21375	0.63412	1
98002349	542.218	468.202	616.234	1.31617	0.396346	0.302427	1
98002350	65.6997	61.8117	69.5878	1.1258	0.170953	0.669766	1
98002351	0.499769	0.999538	0	0	#NAME?	0.329431	1
98002352	1493.02	1602.91	1383.14	0.862893	-0.212746	0.482233	1
98002356	0.143796	0	0.287591	Inf	Inf	1	1
98002357	965.919	1044.06	887.779	0.850316	-0.23393	0.548122	1
98002358	0	0	0	NA	NA	NA	NA
98002361	9093.77	7354.29	10833.2	1.47305	0.558807	0.166646	0.899287
98002362	0.675232	1.35046	0	0	#NAME?	0.411634	1
98002363	0.327553	0.655107	0	0	#NAME?	0.70493	1
98002364	2.04236	1.55542	2.5293	1.62612	0.701436	0.674528	1
98002366	1.85751	1.24474	2.47027	1.98457	0.988825	0.46931	1
98002367	0.431387	0	0.862774	Inf	Inf	0.589287	1
98002369	5.67177	6.93575	4.40779	0.635517	-0.653997	0.41318	1
98002374	4522.1	4027.7	5016.5	1.2455	0.316725	0.383454	1
98002375	355.691	307.096	404.287	1.31648	0.396687	0.274779	0.992661
98002376	13.9624	11.6248	16.3	1.40217	0.487665	0.480136	1
98002377	169.324	127.264	211.385	1.66099	0.732045	0.0629633	0.725296
98002378	0	0	0	NA	NA	NA	NA
98002379	178.25	194.718	161.782	0.830849	-0.267342	0.542979	1
98002380	5.77669	6.00818	5.54521	0.922943	-0.115686	0.909382	1
98002383	5.00986	8.86935	1.15037	0.129701	-2.94674	0.0334936	0.606514
98002386	1.30861	1.48345	1.13377	0.764278	-0.387831	0.977526	1
98002387	3.10772	3.17185	3.0436	0.959566	-0.0595464	1	1
98002388	3021.48	3230.4	2812.55	0.870651	-0.199833	0.504763	1
98002389	0.827308	1.10526	0.549356	0.497037	-1.00858	0.816787	1
98002395	0.471349	0.655107	0.287591	0.438999	-1.18771	0.849488	1
98002396	0.777708	1.55542	0	0	#NAME?	0.19706	0.929294
98002397	0.933046	1.86609	0	0	#NAME?	0.159404	0.891163
98002399	4.39605	4.42308	4.36902	0.987777	-0.0177433	0.967178	1
98002400	238.621	261.295	215.948	0.826452	-0.274996	0.458605	1
98002403	0.417102	0.310676	0.523528	1.68513	0.752858	1	1
98002404	1.10057	0	2.20114	Inf	Inf	0.208293	0.938734
98002405	0.155338	0.310676	0	0	#NAME?	0.894594	1
98002406	99.8918	69.8889	129.895	1.85859	0.894207	0.0289706	0.582099
98002408	2.6972	3.38126	2.01314	0.595382	-0.748113	0.49923	1
98002409	0	0	0	NA	NA	NA	NA
98002410	3.11119	4.07661	2.14577	0.52636	-0.925877	0.478163	1
98002411	78.0212	58.4768	97.5655	1.66845	0.738506	0.0917246	0.78516
98002412	2676.06	2678.86	2673.25	0.997904	-0.00302682	0.990844	1
98002413	2817.47	2101.68	3533.25	1.68116	0.749456	0.0529462	0.688599
98002415	0.287591	0	0.575183	Inf	Inf	0.704372	1
98002418	3.58727	0.344431	6.83012	19.8301	4.30962	0.00210382	0.180037
98002420	0.310676	0.621352	0	0	#NAME?	0.556493	1
98002421	0.541088	0.794586	0.287591	0.361939	-1.46618	0.869926	1
98002422	10.2628	13.1847	7.34087	0.556773	-0.84484	0.329504	1
98002423	0.397293	0.794586	0	0	#NAME?	0.555328	1
98002424	188.986	220.321	157.65	0.715549	-0.482878	0.258681	0.980991
98002425	37.5112	30.7066	44.3159	1.44321	0.529276	0.247911	0.971514
98002426	0.310676	0.621352	0	0	#NAME?	0.511925	1
98002429	57.0651	48.965	65.1653	1.33085	0.412353	0.394912	1
98002433	1.04379	1.27646	0.81112	0.635445	-0.65416	0.77445	1
98002437	753.628	843.934	663.322	0.785988	-0.347422	0.357291	1
98002438	0.482891	0.965783	0	0	#NAME?	0.297482	1
98002442	0.172216	0.344431	0	0	#NAME?	0.90317	1
98002443	1753.51	2094.92	1412.1	0.674061	-0.569049	0.223005	0.949977
98002444	17.9697	21.6193	14.3202	0.662382	-0.594265	0.281344	0.995901
98002445	0.172216	0.344431	0	0	#NAME?	0.9084	1
98002447	153.035	143.232	162.838	1.13688	0.185082	0.67034	1
98002451	0	0	0	NA	NA	NA	NA
98002452	3.78577	5.66171	1.90983	0.337324	-1.56779	0.109401	0.821148
98002454	0.793567	1.58713	0	0	#NAME?	0.180596	0.91444
98002455	119.95	127.824	112.076	0.876798	-0.189683	0.658853	1
98002456	491.153	419.468	562.839	1.34179	0.424163	0.229685	0.956146
98002458	391.522	313.148	469.897	1.50056	0.585499	0.108669	0.819774
98002460	0.615145	0.655107	0.575183	0.877998	-0.18771	1	1
98002463	0.446893	0.344431	0.549356	1.59496	0.673525	1	1
98002464	1832.69	2117.27	1548.11	0.731179	-0.451703	0.179824	0.91444
98002465	0.143796	0	0.287591	Inf	Inf	1	1
98002467	3.86084	2.69443	5.02725	1.86579	0.899789	0.364666	1
98002468	0.360573	0.450154	0.270992	0.601999	-0.732168	1	1
98002470	4.69304	3.90542	5.48067	1.40335	0.488876	0.583322	1
98002473	267.384	182.212	352.556	1.93486	0.952231	0.0233829	0.539314
98002474	3984.52	4168.93	3800.12	0.911533	-0.133633	0.677878	1
98002476	1.01642	2.03283	0	0	#NAME?	0.0491949	0.677089
98002477	1073.85	1024.25	1123.46	1.09687	0.13339	0.684907	1
98002478	1.30326	1.21098	1.39553	1.15239	0.204633	1	1
98002481	42.7134	58.1561	27.2707	0.468922	-1.09258	0.0983458	0.79621
98002482	331.597	275.558	387.636	1.40673	0.492348	0.188683	0.92158
98002483	0.774433	0.450154	1.09871	2.44074	1.28732	0.714077	1
98002484	0.535753	1.07151	0	0	#NAME?	0.390951	1
98002486	0	0	0	NA	NA	NA	NA
98002487	1.16346	2.03933	0.287591	0.141023	-2.826	0.236635	0.96178
98002489	402.588	348.429	456.748	1.31088	0.390531	0.26891	0.989223
98002490	1.64634	2.45572	0.836947	0.340815	-1.55294	0.45164	1
98002493	0	0	0	NA	NA	NA	NA
98002494	341.58	346.418	336.741	0.972064	-0.0408771	0.952009	1
98002497	0.81578	1.34397	0.287591	0.213987	-2.22441	0.387942	1
98002500	248.086	305.729	190.443	0.622912	-0.682899	0.0758301	0.757718
98002502	0.143796	0	0.287591	Inf	Inf	1	1
98002505	0	0	0	NA	NA	NA	NA
98002507	19.7579	18.5149	21.0009	1.13427	0.18176	0.751692	1
98002508	1401.14	1107.89	1694.39	1.52939	0.612958	0.119046	0.833909
98002509	27.1899	20.8874	33.4925	1.60348	0.681208	0.251898	0.975462
98002512	0.155338	0.310676	0	0	#NAME?	0.877071	1
98002513	144.429	119.954	168.905	1.40808	0.493724	0.192539	0.924652
98002514	926.448	867.554	985.342	1.13577	0.183672	0.612574	1
98002515	0.741724	1.48345	0	0	#NAME?	0.17536	0.910737
98002517	0.172216	0.344431	0	0	#NAME?	0.904511	1
98002518	292.076	211.712	372.44	1.75918	0.814902	0.0311944	0.591985
98002522	1.02398	1.76037	0.287591	0.16337	-2.61379	0.212298	0.940516
98002523	10.3421	10.0104	10.6737	1.06627	0.0925667	0.890128	1
98002525	695.241	828.649	561.834	0.678012	-0.560617	0.138658	0.860342
98002526	1.27817	1.48345	1.07288	0.723237	-0.46746	0.980078	1
98002529	1.14883	0.655107	1.64255	2.5073	1.32614	0.721594	1
98002531	838.035	1050.58	625.493	0.59538	-0.748118	0.0402616	0.639237
98002532	1607.16	1131.16	2083.17	1.84163	0.88098	0.0430825	0.651093
98002533	1.08737	2.17473	0	0	#NAME?	0.113726	0.827313
98002534	0.471349	0.655107	0.287591	0.438999	-1.18771	0.854527	1
98002535	11.4148	10.1096	12.7199	1.2582	0.331359	0.612886	1
98002538	620.984	527.713	714.256	1.35349	0.436689	0.268901	0.989223
98002539	0.172216	0.344431	0	0	#NAME?	0.91179	1
98002541	4.13356	5.00418	3.26294	0.652041	-0.616965	0.578265	1
98002542	619.099	636.208	601.99	0.946216	-0.0797583	0.817016	1
98002544	0.655107	1.31021	0	0	#NAME?	0.20918	0.939093
98002545	0.172216	0.344431	0	0	#NAME?	0.89637	1
98002548	4.33671	8.38583	0.287591	0.0342949	-4.86586	0.00893047	0.363828
98002549	2.19527	1.48345	2.90709	1.95969	0.970622	0.502608	1
98002550	1437.96	1644.92	1231	0.74836	-0.418197	0.219504	0.946645
98002551	1904.52	2005.73	1803.3	0.899071	-0.153492	0.654998	1
98002552	0.454471	0.621352	0.287591	0.462848	-1.11139	0.836959	1
98002553	0.442929	0.310676	0.575183	1.85139	0.88861	1	1
98002554	600.241	662.624	537.858	0.811708	-0.300967	0.403968	1
98002555	92.6639	105.775	79.5533	0.752103	-0.410999	0.361602	1
98002559	27.4851	11.737	43.2332	3.68349	1.88107	0.0281156	0.579457
98002560	1179.57	1121.21	1237.94	1.10411	0.14288	0.650461	1
98002561	13.4469	13.7092	13.1846	0.961732	-0.0562935	0.907888	1
98002563	0.327553	0.655107	0	0	#NAME?	0.46308	1
98002564	204.065	159.751	248.378	1.55478	0.636706	0.151369	0.88
98002565	12.3275	2.83391	21.8211	7.7	2.94486	0.0623978	0.724199
98002567	55.881	3.69843	108.064	29.2188	4.86883	0.00763596	0.339589
98002568	1249.9	1081.83	1417.98	1.31073	0.390367	0.287271	0.998181
98002569	0.925821	1.27646	0.575183	0.450608	-1.15005	0.615807	1
98002570	0.316011	0.344431	0.287591	0.834975	-0.260196	1	1
98002572	16.6334	9.49516	23.7716	2.50355	1.32398	0.566383	1
98002573	0.155338	0.310676	0	0	#NAME?	0.884913	1
98002575	0	0	0	NA	NA	NA	NA
98002576	145.999	128.806	163.192	1.26696	0.341376	0.419879	1
98002578	1.24699	1.13902	1.35496	1.18959	0.250463	1	1
98002579	4.0513	5.0424	3.0602	0.606893	-0.720486	0.510624	1
98002581	0.392646	0	0.785293	Inf	Inf	0.572145	1
98017196	9.25384	17.7224	0.785293	0.0443108	-4.4962	1.61e-05	0.00659944
98002585	0.225077	0.450154	0	0	#NAME?	0.920226	1
98002588	0.143796	0	0.287591	Inf	Inf	1	1
98002590	0.471349	0.655107	0.287591	0.438999	-1.18771	0.868753	1
98002591	1.0009	1.13902	0.862774	0.757473	-0.400735	1	1
98002592	50.8849	44.9351	56.8347	1.26482	0.338929	0.410404	1
98002594	151.645	131.05	172.24	1.31431	0.394307	0.289364	0.999436
98002596	0.344431	0.688862	0	0	#NAME?	0.546897	1
98002598	1.06962	1.27646	0.862774	0.675912	-0.565092	0.788515	1
98002600	425.423	343.121	507.725	1.47972	0.565327	0.151511	0.88
98002602	550.951	459.223	642.68	1.3995	0.484907	0.1933	0.924978
98002605	0.316011	0.344431	0.287591	0.834975	-0.260196	1	1
98002606	1.99666	3.20802	0.785293	0.24479	-2.03038	0.167782	0.901167
98002607	4.7759	4.69797	4.85383	1.03318	0.0470885	1	1
98002608	2.27304	3.97089	0.575183	0.14485	-2.78737	0.0498345	0.679076
98002609	527.891	528.518	527.265	0.997628	-0.00342569	0.956322	1
98002610	0.78736	0.999538	0.575183	0.575448	-0.797242	0.849811	1
98002611	0.310676	0.621352	0	0	#NAME?	0.504773	1
98002612	0.671249	1.07151	0.270992	0.252908	-1.98332	0.672941	1
98002613	400.314	304.707	495.922	1.62754	0.702689	0.332932	1
98002615	176.528	126.672	226.385	1.78717	0.837675	0.0232578	0.538558
98002616	1820.9	2141.88	1499.92	0.700281	-0.513993	0.137998	0.859698
98002618	4.30272	5.06966	3.53578	0.69744	-0.519858	0.59792	1
98002619	521.393	558.643	484.143	0.866641	-0.206493	0.58921	1
98002620	9734.12	9513.8	9954.44	1.04632	0.0653181	0.82889	1
98002622	353.685	350.047	357.324	1.02079	0.0296835	1	1
98002625	0.155338	0.310676	0	0	#NAME?	0.89737	1
98002626	16.8067	14.5058	19.1077	1.31724	0.397517	0.49852	1
98002627	1.37157	0.621352	2.1218	3.41481	1.77181	0.525066	1
98002629	0.454471	0.621352	0.287591	0.462848	-1.11139	0.868882	1
98002630	0.344431	0.688862	0	0	#NAME?	0.522456	1
98002632	0.143796	0	0.287591	Inf	Inf	1	1
98002634	449.212	342.224	556.199	1.62525	0.700659	0.0574027	0.704002
98002636	67.6801	58.1921	77.168	1.32609	0.407179	0.324882	1
98002638	2.14181	2.34796	1.93566	0.824398	-0.278587	0.870792	1
98002639	0.741692	0.688862	0.794521	1.15338	0.205869	1	1
98002640	0.75894	0.655107	0.862774	1.317	0.397252	1	1
98002644	1.52442	1.13902	1.90983	1.67674	0.745656	0.74593	1
98002646	1.20243	1.03329	1.37156	1.32737	0.408568	1	1
98002647	397.138	308.272	486.004	1.57654	0.656762	0.0635149	0.728096
98002650	0.172216	0.344431	0	0	#NAME?	0.89111	1
98002652	5.23981	8.80388	1.67575	0.190342	-2.39333	0.020871	0.51715
98002653	8.90098	9.3939	8.40807	0.895057	-0.159948	0.818613	1
98002655	0.794586	1.58917	0	0	#NAME?	0.203569	0.933938
98002656	0.466014	0.932027	0	0	#NAME?	0.333073	1
98002658	0.225077	0.450154	0	0	#NAME?	0.893717	1
98002660	0.655107	1.31021	0	0	#NAME?	0.184802	0.917066
98002661	1.13402	1.69286	0.575183	0.33977	-1.55737	0.425613	1
98002662	0.172216	0.344431	0	0	#NAME?	0.908783	1
98002664	0.541985	0	1.08397	Inf	Inf	0.358994	1
98002666	9.95049	13.2294	6.6716	0.504302	-0.98764	0.160384	0.892257
98002667	2878.39	2240.06	3516.73	1.56993	0.650697	0.0852157	0.773353
98002668	3.40841	4.80369	2.01314	0.419082	-1.2547	0.273738	0.991955
98002671	363.74	279.16	448.32	1.60596	0.683435	0.0636267	0.728096
98002672	0.287591	0	0.575183	Inf	Inf	0.695191	1
98002675	331.724	244.472	418.975	1.7138	0.777198	0.190357	0.923105
98002676	0.707969	1.41594	0	0	#NAME?	0.255019	0.978043
98002679	0.270992	0	0.541985	Inf	Inf	0.735117	1
98002680	1275.45	1211.83	1339.08	1.105	0.144051	0.777667	1
98002681	6.82168	9.326	4.31736	0.462938	-1.11111	0.210912	0.939617
98002683	16.026	4.83299	27.2191	5.63194	2.49363	0.194055	0.924978
98002686	8.7374	8.59485	8.87995	1.03317	0.0470786	1	1
98002687	0.919614	0.688862	1.15037	1.66995	0.739804	0.967551	1
98002690	561.292	548.922	573.661	1.04507	0.0635955	0.840022	1
98002691	156.363	99.2791	213.448	2.14998	1.10432	0.010136	0.386927
98002694	3.40215	2.45369	4.35062	1.77309	0.826269	0.626401	1
98002695	0.310676	0.621352	0	0	#NAME?	0.5579	1
98002698	0	0	0	NA	NA	NA	NA
98002700	99.0212	88.9305	109.112	1.22693	0.295056	0.525225	1
98002701	0	0	0	NA	NA	NA	NA
98002702	3.51657	4.82649	2.20665	0.457195	-1.12912	0.279483	0.995416
98002703	422.087	347.914	496.26	1.42639	0.512365	0.271132	0.990965
98002707	11.1685	9.35326	12.9838	1.38815	0.473167	0.593444	1
98002710	6.5678	7.97757	5.15802	0.646566	-0.629132	0.546579	1
98002711	214.851	240.168	189.534	0.789169	-0.341593	0.402994	1
98002713	287.562	228.232	346.893	1.51992	0.603994	0.114953	0.828348
98002714	22.2603	29.7636	14.757	0.495806	-1.01215	0.0514945	0.682195
98002716	146.151	92.3202	199.981	2.16617	1.11515	0.024161	0.543993
98002717	0.512668	0.450154	0.575183	1.27775	0.3536	1	1
98002720	0.59395	0.900309	0.287591	0.319436	-1.6464	0.897316	1
98002721	1.33466	2.38172	0.287591	0.120749	-3.04991	0.0860786	0.775006
98002724	1.94443	2.51916	1.3697	0.543714	-0.87908	0.547474	1
98002725	264.683	239.084	290.282	1.21414	0.279939	0.725911	1
98002726	38.1478	42.6133	33.6824	0.79042	-0.339309	0.449801	1
98002727	0	0	0	NA	NA	NA	NA
98002730	60.9417	67.7063	54.1772	0.80018	-0.321604	0.612761	1
98002731	1.25041	1.35046	1.15037	0.85183	-0.231363	1	1
98002732	224.682	293.289	156.076	0.532158	-0.910073	0.022364	0.528203
98002733	1334.46	1307.17	1361.74	1.04175	0.0590093	0.893576	1
98002736	0.172216	0.344431	0	0	#NAME?	0.901392	1
98002737	0.406488	0	0.812977	Inf	Inf	0.548254	1
98002739	0.541088	0.794586	0.287591	0.361939	-1.46618	0.893144	1
98002740	1.47935	1.58713	1.37156	0.864174	-0.210606	0.924271	1
98002741	12.2714	7.73034	16.8125	2.17487	1.12093	0.139625	0.862243
98002742	0.225077	0.450154	0	0	#NAME?	0.898454	1
98002743	0.753252	1.24474	0.261764	0.210296	-2.2495	0.559544	1
98002744	1.48912	1.82788	1.15037	0.629344	-0.668079	0.82132	1
98002745	139.134	161.826	116.441	0.719544	-0.474845	0.213839	0.941438
98002747	207.896	164.703	251.089	1.52449	0.608331	0.189353	0.92178
98002749	847.6	792.609	902.591	1.13876	0.187463	0.622061	1
98002750	20.5449	16.1312	24.9585	1.54722	0.62968	0.442711	1
98002752	0.668006	0.76083	0.575183	0.755993	-0.403555	1	1
98002756	2.87089	3.31578	2.42599	0.731648	-0.450777	0.828237	1
98002757	9.03381	6.04436	12.0233	1.98917	0.992167	0.597473	1
98002758	1.10661	1.65465	0.558584	0.337585	-1.56668	0.403088	1
98002760	277.082	243.866	310.298	1.27241	0.347563	0.341228	1
98002761	3.29764	4.59874	1.99654	0.43415	-1.20374	0.515646	1
98002762	1.48305	1.83234	1.13377	0.618754	-0.692561	0.774818	1
98002763	510.546	428.272	592.82	1.38421	0.469065	0.192057	0.924128
98002765	1471.19	1239.64	1702.75	1.37358	0.457939	0.24898	0.972718
98002766	1.31811	1.58917	1.04706	0.65887	-0.601935	0.983455	1
98002767	0.299134	0.310676	0.287591	0.925696	-0.11139	1	1
98002768	0.62237	1.24474	0	0	#NAME?	0.368622	1
98002769	195.973	181.79	210.156	1.15603	0.209184	0.64665	1
98002770	2.14302	2.38172	1.90432	0.799555	-0.32273	0.871591	1
98002772	11.0273	7.63314	14.4215	1.88933	0.917872	0.148262	0.875019
98002774	1.79446	2.72615	0.862774	0.316481	-1.65981	0.275147	0.992669
98002775	0.155338	0.310676	0	0	#NAME?	0.902387	1
98002776	600.114	509.306	690.923	1.3566	0.439991	0.217949	0.945488
98002777	0.344431	0.688862	0	0	#NAME?	0.585947	1
98002778	1.00872	0.655107	1.36233	2.07956	1.05628	0.800449	1
98002780	2.61275	4.10833	1.11717	0.271927	-1.87871	0.137775	0.859698
98002782	2754.7	3092.11	2417.29	0.78176	-0.355202	0.28619	0.997462
98002784	0.466014	0.932027	0	0	#NAME?	0.303926	1
98002786	538.649	548.427	528.87	0.964339	-0.0523878	0.868467	1
98002790	0.172216	0.344431	0	0	#NAME?	0.89355	1
98002791	2.11236	3.93714	0.287591	0.0730458	-3.77505	0.0238765	0.543301
98002792	0.541985	0	1.08397	Inf	Inf	0.489292	1
98002795	1469.62	1578.53	1360.7	0.862004	-0.214233	0.472777	1
98002796	1.17308	0.688862	1.65729	2.40584	1.26654	0.660291	1
98002799	4372.15	3838.75	4905.55	1.2779	0.353777	0.337381	1
98002800	1.0524	2.1048	0	0	#NAME?	0.075552	0.757401
98002801	660.247	739.08	581.415	0.786674	-0.346162	0.345573	1
98002802	0.550284	0	1.10057	Inf	Inf	0.393044	1
98002803	562.751	418.435	707.068	1.68979	0.756844	0.0474813	0.668376
98002804	1.61956	2.13855	1.10057	0.514632	-0.958388	0.591626	1
98002805	1.04472	1.27646	0.812977	0.6369	-0.65086	0.781431	1
98002812	0.327553	0.655107	0	0	#NAME?	0.504981	1
98002813	0.516647	1.03329	0	0	#NAME?	0.316323	1
98002814	4.71124	7.14758	2.2749	0.318276	-1.65165	0.132336	0.85184
98002815	2.35666	3.07262	1.6407	0.533973	-0.905161	0.654811	1
98002816	287.189	289.2	285.178	0.986094	-0.0202035	0.980692	1
98002818	0.819027	1.35046	0.287591	0.212958	-2.23136	0.77701	1
98002819	3.31199	3.62646	2.99751	0.826568	-0.274795	0.905972	1
98002820	589.384	530.82	647.949	1.22065	0.287655	0.47017	1
98002821	589.303	557.519	621.087	1.11402	0.155773	0.633242	1
98002822	5.29661	6.58928	4.00394	0.607645	-0.718699	0.324728	1
98002825	2.32125	3.28203	1.36048	0.414523	-1.27048	0.360881	1
98002826	0	0	0	NA	NA	NA	NA
98002828	2.01726	1.82788	2.20665	1.20722	0.271687	0.977371	1
98002829	0.880184	1.76037	0	0	#NAME?	0.113199	0.827307
98053158	3.26724	6.24689	0.287591	0.0460375	-4.44105	0.000453313	0.0747829
98002831	1.35773	0.621352	2.09411	3.37026	1.75286	0.814389	1
98002832	1.49826	1.89781	1.09871	0.578936	-0.788524	0.669174	1
98002835	0.397293	0.794586	0	0	#NAME?	0.487897	1
98002839	3.95999	5.14366	2.77632	0.539755	-0.889623	0.422207	1
98002840	0.713304	1.13902	0.287591	0.252491	-1.9857	0.63862	1
98002841	2.47033	1.96532	2.97534	1.51392	0.598292	0.801383	1
98002844	0	0	0	NA	NA	NA	NA
98002845	251.216	244.996	257.436	1.05077	0.0714516	0.81428	1
98002847	0.316011	0.344431	0.287591	0.834975	-0.260196	1	1
98002848	0.299134	0.310676	0.287591	0.925696	-0.11139	1	1
98002849	0.172216	0.344431	0	0	#NAME?	0.892979	1
98002850	0	0	0	NA	NA	NA	NA
98002851	1.35153	2.41548	0.287591	0.119062	-3.07022	0.113873	0.827313
98002853	3.58868	3.45526	3.72209	1.07722	0.107317	0.99569	1
98002854	8.70129	5.11233	12.2903	2.40404	1.26546	0.136043	0.856146
98002856	0	0	0	NA	NA	NA	NA
98002857	0.765147	1.2427	0.287591	0.231424	-2.11139	0.59321	1
98002858	280.026	327.502	232.549	0.710071	-0.493965	0.178358	0.914274
98002859	2084.74	1626.72	2542.76	1.56312	0.644429	0.253474	0.976425
98002861	0.316011	0.344431	0.287591	0.834975	-0.260196	1	1
98002862	0.552631	1.10526	0	0	#NAME?	0.307393	1
98002863	1.78843	1.69286	1.884	1.11291	0.154341	1	1
98002865	5.93973	6.90199	4.97746	0.721162	-0.471605	0.561508	1
98002868	0.569508	1.13902	0	0	#NAME?	0.247726	0.971514
98002869	0	0	0	NA	NA	NA	NA
98002870	4.95952	6.59336	3.32567	0.504398	-0.987366	0.321769	1
98002871	0.524211	0.76083	0.287591	0.377997	-1.40355	0.867081	1
98002872	189.087	158.594	219.58	1.38454	0.469404	0.222628	0.949475
98002874	644.283	462.816	825.749	1.78419	0.835265	0.0292229	0.582099
98002875	338.741	308.335	369.146	1.19722	0.25969	0.486202	1
98002876	622.359	500.07	744.649	1.48909	0.574431	0.263605	0.98541
98002877	1250.58	1560.85	940.313	0.602437	-0.731119	0.0376057	0.630936
98002879	459.831	509.069	410.592	0.806555	-0.310156	0.360911	1
98002880	264.564	176.33	352.798	2.00079	1.00057	0.0382826	0.632804
98002881	0.450154	0.900309	0	0	#NAME?	0.611714	1
98002883	1.61793	2.66068	0.575183	0.216179	-2.2097	0.198723	0.930581
98002884	128.589	113.503	143.675	1.26583	0.34008	0.387193	1
98002886	0.172216	0.344431	0	0	#NAME?	0.900928	1
98002887	804.503	956.192	652.814	0.682723	-0.550629	0.147679	0.874373
98002888	0.287591	0	0.575183	Inf	Inf	0.739443	1
98002889	11.2865	11.1767	11.3964	1.01966	0.0280811	1	1
98002890	64.9295	77.2036	52.6555	0.682034	-0.552085	0.168308	0.901394
98002891	258.786	214.458	303.114	1.4134	0.499167	0.173849	0.909545
98002892	125.849	94.5897	157.108	1.66095	0.732005	0.101145	0.802735
98002896	208.842	168.39	249.293	1.48045	0.566036	0.154659	0.884364
98002897	15521.5	15658.1	15384.9	0.982548	-0.0253996	0.973495	1
98002898	15.4953	21.3806	9.61004	0.449475	-1.15369	0.0596013	0.712459
98002899	0.8442	1.6884	0	0	#NAME?	0.140138	0.86254
98002900	1.75416	2.93314	0.575183	0.196098	-2.35035	0.195026	0.926686
98002902	1.33657	1.58917	1.08397	0.682097	-0.551951	0.978997	1
98002905	0.423087	0	0.846175	Inf	Inf	0.56335	1
98002906	0.59395	0.900309	0.287591	0.319436	-1.6464	0.867331	1
98002909	46.7557	44.7533	48.758	1.08948	0.123644	0.76093	1
98002910	1728.8	1275	2182.6	1.71185	0.775555	0.129744	0.849118
98002911	3841.1	4429.18	3253.02	0.734452	-0.445259	0.207053	0.937044
98002912	1.26452	1.21098	1.31805	1.08841	0.122224	1	1
98002913	1522.01	1786.9	1257.12	0.703523	-0.507331	0.15636	0.885866
98002914	0	0	0	NA	NA	NA	NA
98002915	4.51509	3.76148	5.2687	1.4007	0.486147	0.639341	1
98002916	335.572	313.377	357.766	1.14164	0.191114	0.656531	1
98002917	842.152	1022.15	662.151	0.6478	-0.626379	0.0754683	0.757401
98002919	0.172216	0.344431	0	0	#NAME?	0.900294	1
98002920	0.143796	0	0.287591	Inf	Inf	1	1
98002921	3.21037	2.9311	3.48964	1.19056	0.251636	1	1
98002922	28.7613	25.5535	31.9692	1.25107	0.32316	0.89789	1
98002924	0.516647	1.03329	0	0	#NAME?	0.267616	0.988259
98002925	0.471349	0.655107	0.287591	0.438999	-1.18771	0.840739	1
98002926	0.172216	0.344431	0	0	#NAME?	0.908398	1
98002930	0.392646	0	0.785293	Inf	Inf	0.623806	1
98002933	0	0	0	NA	NA	NA	NA
98002934	671.545	711.395	631.696	0.887968	-0.17142	0.614962	1
98002935	909.872	1096.48	723.265	0.659624	-0.600284	0.120396	0.836731
98002937	1.16346	2.03933	0.287591	0.141023	-2.826	0.26258	0.984144
98002938	2.38119	3.03683	1.72555	0.568207	-0.81551	0.543075	1
98002943	0.823344	1.07151	0.575183	0.536798	-0.897548	0.833876	1
98002949	0.736374	1.21098	0.261764	0.216158	-2.20984	0.62004	1
98002950	940.589	1059.1	822.076	0.776201	-0.365498	0.293515	1
98002951	4.62969	4.48652	4.77286	1.06382	0.0892571	1	1
98002953	0.585651	0.900309	0.270992	0.300999	-1.73217	0.874408	1
98002954	0.397293	0.794586	0	0	#NAME?	0.487371	1
98002956	0.777676	0.76083	0.794521	1.04428	0.0625104	1	1
98002957	26.6624	18.0242	35.3007	1.95852	0.969767	0.157333	0.887779
98002959	0.934663	0.794586	1.07474	1.35258	0.435715	0.9743	1
98002962	0	0	0	NA	NA	NA	NA
98002963	10.3971	13.0497	7.74449	0.593463	-0.75277	0.500171	1
98002967	1.30725	2.03933	0.575183	0.282045	-1.826	0.383296	1
98002969	0.431387	0	0.862774	Inf	Inf	0.565759	1
98002970	1.56763	1.80062	1.33465	0.741217	-0.432032	1	1
98002971	1.50644	0.900309	2.11257	2.34649	1.23051	0.543221	1
98002973	4.21298	6.25988	2.16608	0.346026	-1.53105	0.169414	0.903429
98002976	0.450154	0.900309	0	0	#NAME?	0.527194	1
98002977	0.59395	0.900309	0.287591	0.319436	-1.6464	0.884029	1
98002981	357.334	344.828	369.839	1.07253	0.101022	0.803663	1
98002982	0.81578	1.34397	0.287591	0.213987	-2.22441	0.390004	1
98002986	1168.65	1469.31	867.988	0.590744	-0.759395	0.0339167	0.608158
98002989	0.671985	1.34397	0	0	#NAME?	0.15601	0.885623
98002991	0.569508	1.13902	0	0	#NAME?	0.394173	1
98002993	0.803749	0	1.6075	Inf	Inf	0.31391	1
98002994	275.354	228.476	322.232	1.41036	0.496059	0.176629	0.912312
98002995	0.875538	0.965783	0.785293	0.813115	-0.298468	1	1
98002998	77.9663	74.2072	81.7255	1.10132	0.139227	0.776173	1
98003000	5.18368	7.59289	2.77446	0.365402	-1.45244	0.0797644	0.761936
98003001	911.997	878.91	945.083	1.07529	0.104726	0.813867	1
98003003	4.1651	2.82742	5.50278	1.94622	0.960677	0.578706	1
98003005	368.947	430.315	307.578	0.714774	-0.484441	0.232625	0.95888
98003006	0.225077	0.450154	0	0	#NAME?	0.904292	1
98003010	0.737746	0.900309	0.575183	0.638873	-0.6464	1	1
98003012	545.982	458.212	633.752	1.3831	0.467901	0.209359	0.939252
98003017	0.155338	0.310676	0	0	#NAME?	0.892909	1
98003018	1207.26	1046.55	1367.97	1.30713	0.3864	0.34011	1
98003020	0.172216	0.344431	0	0	#NAME?	0.910321	1
98003021	0.499769	0.999538	0	0	#NAME?	0.398777	1
98003022	0.316011	0.344431	0.287591	0.834975	-0.260196	1	1
98003023	1.64739	1.62089	1.67389	1.0327	0.0464219	1	1
98003024	0.135496	0	0.270992	Inf	Inf	1	1
98003025	0.971118	1.65465	0.287591	0.173808	-2.52443	0.289286	0.999436
98003027	2.37846	4.20756	0.549356	0.130564	-2.93717	0.0265338	0.565205
98003028	45.3648	55.2924	35.4373	0.640907	-0.641812	0.182755	0.916078
98003029	4.64258	3.622	5.66315	1.56354	0.644818	0.702859	1
98003030	0.143796	0	0.287591	Inf	Inf	1	1
98003031	6.0833	3.52074	8.64587	2.4557	1.29613	0.139346	0.861473
98003032	488.919	585.83	392.009	0.669152	-0.579594	0.0995349	0.798248
98003033	0.83057	1.66114	0	0	#NAME?	0.136897	0.858317
98003034	540.109	481.556	598.662	1.24318	0.314038	0.375562	1
98003035	1311.19	1098.08	1524.29	1.38815	0.47316	0.205958	0.936171
98003037	1.29935	0.688862	1.90983	2.77244	1.47116	0.575771	1
98003038	0.344431	0.688862	0	0	#NAME?	0.517567	1
98003039	0.172216	0.344431	0	0	#NAME?	0.903882	1
98003040	9.98656	13.9117	6.06137	0.435701	-1.19859	0.490374	1
98003042	0.155338	0.310676	0	0	#NAME?	0.893527	1
98003044	117.445	86.6366	148.254	1.71122	0.775022	0.0505761	0.679785
98003045	272.049	243.683	300.415	1.23281	0.301951	0.386565	1
98003047	10.9933	9.64113	12.3456	1.28051	0.356718	0.56385	1
98003051	11.3497	18.9606	3.73869	0.197181	-2.3424	0.00790727	0.341851
98003052	134.115	121.328	146.902	1.21079	0.275946	0.395791	1
98003054	1258.5	1190.78	1326.21	1.11372	0.155393	0.662163	1
98003055	1585.62	1656.15	1515.1	0.914833	-0.128419	0.707439	1
98003056	0.671938	0	1.34388	Inf	Inf	0.353057	1
98003057	0.310676	0.621352	0	0	#NAME?	0.622985	1
98003058	0.143796	0	0.287591	Inf	Inf	1	1
98003059	72.2539	72.1551	72.3526	1.00274	0.00394414	0.940536	1
98003063	0.172216	0.344431	0	0	#NAME?	0.903652	1
98003064	0.225077	0.450154	0	0	#NAME?	0.909991	1
98003065	1.88641	2.62246	1.15037	0.438658	-1.18883	0.48588	1
98003067	1281.05	1110.12	1451.98	1.30795	0.387312	0.318485	1
98003068	0.523528	0	1.04706	Inf	Inf	0.590053	1
98003069	1.54387	2.80016	0.287591	0.102705	-3.28342	0.109217	0.820808
98003070	368.194	283.667	452.722	1.59596	0.674428	0.0614738	0.719687
98003071	4386.3	3439.85	5332.75	1.55029	0.632534	0.072743	0.752077
98003073	6.62594	8.49562	4.75626	0.559848	-0.836892	0.396022	1
98003074	0.327553	0.655107	0	0	#NAME?	0.533047	1
98003076	0.713304	1.13902	0.287591	0.252491	-1.9857	0.56676	1
98003077	218.57	252.165	184.975	0.733546	-0.44704	0.311381	1
98003078	0.78736	0.999538	0.575183	0.575448	-0.797242	0.844612	1
98003080	0.172216	0.344431	0	0	#NAME?	0.893373	1
98003083	1085.91	780.87	1390.95	1.78128	0.832916	0.0251123	0.553913
98003084	0.316011	0.344431	0.287591	0.834975	-0.260196	1	1
98003085	207.42	229.577	185.262	0.806972	-0.309409	0.416371	1
98003086	0.615423	0.688862	0.541985	0.786782	-0.345964	1	1
98003087	0.516647	1.03329	0	0	#NAME?	0.330584	1
98003089	1199.41	1150.48	1248.34	1.08506	0.117771	0.780692	1
98003090	0.541088	0.794586	0.287591	0.361939	-1.46618	0.893745	1
98003095	0.172216	0.344431	0	0	#NAME?	0.910012	1
98003097	1.14195	1.76037	0.523528	0.297397	-1.74954	0.465587	1
98003099	576.662	458.731	694.593	1.51416	0.598518	0.106736	0.816021
98003101	0.535753	1.07151	0	0	#NAME?	0.283804	0.996229
98003104	7.75703	11.0823	4.43176	0.399895	-1.32231	0.0510492	0.680674
98003105	0.155338	0.310676	0	0	#NAME?	0.896525	1
98003106	0.143796	0	0.287591	Inf	Inf	1	1
98003107	0.225077	0.450154	0	0	#NAME?	0.906506	1
98003110	4.64408	6.5303	2.75786	0.422318	-1.2436	0.22258	0.949475
98003114	5.32153	6.45833	4.18473	0.647959	-0.626026	0.48246	1
98003115	0.327553	0.655107	0	0	#NAME?	0.470875	1
98003116	0.414788	0	0.829576	Inf	Inf	0.591343	1
98003118	0.77669	1.55338	0	0	#NAME?	0.26739	0.988259
98003119	435.918	305.161	566.676	1.85698	0.892955	0.0731597	0.752077
98003120	201.959	195.455	208.462	1.06655	0.0929505	0.718817	1
98003121	1.21962	1.86405	0.575183	0.308565	-1.69635	0.478342	1
98003122	2.61868	4.66217	0.575183	0.123372	-3.01891	0.0807295	0.7632
98012099	6.20066	11.8427	0.558584	0.0471667	-4.40609	4.2e-05	0.0143192
98003124	1.00179	0.344431	1.65915	4.81708	2.26816	0.531334	1
98003127	0.904626	1.52166	0.287591	0.188998	-2.40355	0.376188	1
98003128	338.528	272.055	405	1.48867	0.574022	0.128086	0.847331
98003130	1.75801	1.86609	1.64992	0.88416	-0.17762	1	1
98003131	2.96015	5.07412	0.846175	0.166763	-2.58413	0.0369102	0.62678
98003133	1.20376	1.83234	0.575183	0.313907	-1.67159	0.410906	1
98003134	1.54421	2.24224	0.846175	0.377379	-1.40591	0.299869	1
98003137	0.225077	0.450154	0	0	#NAME?	0.905269	1
98003139	5.45342	5.91099	4.99585	0.845181	-0.242668	0.974059	1
98003140	0.98266	1.96532	0	0	#NAME?	0.0555363	0.697864
98003141	0.705005	1.13902	0.270992	0.237918	-2.07146	0.53473	1
98003143	0.83057	1.66114	0	0	#NAME?	0.360744	1
98003148	1.65067	2.72615	0.575183	0.210987	-2.24477	0.164943	0.896993
98003149	28.7526	23.2719	34.2334	1.47102	0.556815	0.44121	1
98003150	1.39819	1.9336	0.862774	0.4462	-1.16424	0.615136	1
98003151	57.4139	63.4595	51.3684	0.809467	-0.304955	0.534172	1
98003152	63.1155	72.3032	53.9278	0.745856	-0.423032	0.355864	1
98003153	80.7954	71.3822	90.2086	1.26374	0.337701	0.433149	1
98003154	10.6417	4.91145	16.372	3.33343	1.73701	0.0550437	0.696389
98003155	43.64	23.1068	64.1732	2.77724	1.47365	0.148388	0.875019
98003158	189.097	254.614	123.581	0.485368	-1.04285	0.0104633	0.389978
98003159	1051.67	1048.43	1054.91	1.00617	0.0088797	0.996494	1
98003160	0	0	0	NA	NA	NA	NA
98003161	2702.54	3102.28	2302.8	0.742292	-0.429941	0.22381	0.950705
98003162	0.172216	0.344431	0	0	#NAME?	0.909062	1
98003164	1.68924	0.688862	2.68961	3.90442	1.96511	0.357344	1
98003166	296.826	281.943	311.708	1.10557	0.144794	0.718851	1
98003168	0.561826	0.310676	0.812977	2.6168	1.3878	0.920509	1
98003169	1.21204	1.58713	0.836947	0.527332	-0.923216	0.637628	1
98003170	357.616	353.164	362.069	1.02521	0.0359262	0.918212	1
98003172	0	0	0	NA	NA	NA	NA
98003173	295.835	290.901	300.77	1.03393	0.0481327	0.881249	1
98003176	0.397293	0.794586	0	0	#NAME?	0.477715	1
98003177	1547.93	1438.87	1656.99	1.15159	0.203623	0.59644	1
98003178	1646.54	2042.97	1250.11	0.611907	-0.708616	0.0410478	0.644028
98003179	0.516647	1.03329	0	0	#NAME?	0.319817	1
98003181	1.01568	1.76037	0.270992	0.153941	-2.69955	0.215617	0.943721
98003182	0.299134	0.310676	0.287591	0.925696	-0.11139	1	1
98003183	1.85226	1.82788	1.87663	1.02667	0.0379759	1	1
98003184	657.378	631.465	683.291	1.08207	0.113799	0.772934	1
98003185	2107.02	2184.98	2029.07	0.928644	-0.106802	0.734771	1
98000960	18.3889	35.0948	1.68312	0.0479593	-4.38204	2.06e-05	0.00826801
98003190	0.172216	0.344431	0	0	#NAME?	0.908933	1
98003192	0.713272	0.344431	1.08211	3.14174	1.65156	0.70547	1
98003193	1.50066	2.13855	0.862774	0.403438	-1.30958	0.445324	1
98003194	2.19306	1.62089	2.76523	1.706	0.770616	0.730966	1
98003195	114.112	130.438	97.7865	0.749679	-0.415655	0.277218	0.993691
98003197	0.316011	0.344431	0.287591	0.834975	-0.260196	1	1
98003199	1.6811	0.344431	3.01777	8.76161	3.1312	0.104648	0.811794
98003200	0.450154	0.900309	0	0	#NAME?	0.495096	1
98003201	0.488227	0.688862	0.287591	0.417487	-1.2602	0.863245	1
98003202	0.225077	0.450154	0	0	#NAME?	0.904705	1
98003203	247.484	196.327	298.642	1.52115	0.605162	0.126396	0.844009
98003205	0	0	0	NA	NA	NA	NA
98003206	0.225077	0.450154	0	0	#NAME?	0.909837	1
98003208	1.02467	0.688862	1.36048	1.97496	0.981823	0.818846	1
98003210	2.68321	3.97089	1.39553	0.35144	-1.50865	0.273565	0.991955
98003212	2356.24	2291.45	2421.03	1.05655	0.0793614	0.77344	1
98003213	0.397293	0.794586	0	0	#NAME?	0.557478	1
98003215	1297.24	1306.45	1288.02	0.985899	-0.0204876	0.985316	1
98003216	11.283	12.7052	9.86083	0.776124	-0.36564	0.63079	1
98003217	0.962823	1.35046	0.575183	0.425915	-1.23136	0.912803	1
98003218	1.24474	2.48948	0	0	#NAME?	0.105017	0.812245
98003219	39.6891	31.2763	48.1019	1.53796	0.621023	0.32631	1
[truncated: 43,300 more rows]

## Sheet: day 14
id	baseMean	baseMeanA	baseMeanB	foldChange	log2FoldChange	pval	padj
98000000	0.526715	0.711383	0.342046	0.480819	-1.05643	0.963988	1
98000002	3.61573	2.80541	4.42606	1.57769	0.657814	0.673642	1
98000006	0.355691	0.711383	0	0	#NAME?	0.614334	1
98000008	2.24748	1.72049	2.77448	1.61261	0.689399	0.667552	1
98000009	358.01	409.564	306.457	0.748251	-0.418406	0.283777	1
98000011	1196.29	1168	1224.58	1.04844	0.0682425	0.899562	1
98000012	2130.24	2277.57	1982.91	0.870625	-0.199876	0.639408	1
98000013	2.42186	2.9227	1.92102	0.657275	-0.60543	0.695022	1
98000014	0.601278	0.926138	0.276418	0.298463	-1.74438	0.676389	1
98000017	3.36851	3.31988	3.41714	1.0293	0.0416613	1	1
98000018	3036.58	3240.11	2833.05	0.874369	-0.193686	0.597203	1
98000020	0.597751	0	1.1955	Inf	Inf	0.288563	1
98000023	289.528	299.3	279.755	0.9347	-0.0974247	0.782184	1
98000025	1.63965	0.570447	2.70885	4.74864	2.24751	0.227801	1
98000027	55.4893	49.9768	61.0018	1.2206	0.287594	0.605756	1
98000028	238.222	260.744	215.7	0.827246	-0.273612	0.560463	1
98000029	1.50288	1.679	1.32676	0.790207	-0.339698	0.943308	1
98000030	1.11389	0.341199	1.88658	5.52926	2.46709	0.311722	1
98000033	0.348869	0.355691	0.342046	0.961638	-0.0564345	1	1
98000034	388.189	357.477	418.902	1.17183	0.228763	0.557612	1
98000035	2.63458	3.77303	1.49612	0.396531	-1.33449	0.428237	1
98000039	1572.55	1381.72	1763.38	1.27622	0.351881	0.390684	1
98000041	139.886	154.83	124.941	0.806956	-0.309438	0.535001	1
98000043	0.609429	0.341199	0.87766	2.57228	1.36305	0.796745	1
98000044	378.606	411.142	346.07	0.841728	-0.248574	0.4772	1
98000045	303.941	226.251	381.632	1.68677	0.75426	0.0754419	1
98000047	0.487078	0.355691	0.618464	1.73877	0.798063	1	1
98000050	2.04821	2.53467	1.56175	0.616155	-0.698635	0.622516	1
98000052	351.107	328.856	373.358	1.13532	0.183103	0.645335	1
98000055	0.833556	0.682398	0.984714	1.44302	0.529091	1	1
98000057	8.18418	9.21256	7.15579	0.776743	-0.36449	0.65362	1
98000058	0.905683	0.982114	0.829253	0.844355	-0.244078	1	1
98000061	68.127	52.0779	84.176	1.61635	0.692736	0.107311	1
98000063	29.3998	38.2039	20.5957	0.539099	-0.891378	0.42652	1
98000064	135.287	159.088	111.487	0.700785	-0.512956	0.21873	1
98000065	0.822301	0	1.6446	Inf	Inf	0.239094	1
98000066	2.08686	1.48209	2.69163	1.8161	0.860842	0.673063	1
98000067	1.06897	0.341199	1.79674	5.26597	2.3967	0.289233	1
98000068	0.150311	0	0.300621	Inf	Inf	1	1
98000069	162.659	145.768	179.55	1.23175	0.30071	0.400169	1
98000070	0.4939	0.711383	0.276418	0.388564	-1.36378	0.962063	1
98000071	1.77706	2.33441	1.21971	0.52249	-0.936526	0.610016	1
98000073	0.177846	0.355691	0	0	#NAME?	0.974501	1
98000074	2.6319	2.16449	3.0993	1.43188	0.517915	0.837428	1
98000076	0.913382	0.69689	1.12987	1.62131	0.697158	0.824346	1
98000077	0.846864	1.14089	0.552835	0.484563	-1.04524	0.819371	1
98000078	924.183	909.442	938.924	1.03242	0.0460259	0.972317	1
98000079	1013.5	1186.18	840.829	0.708856	-0.496436	0.211994	1
98000080	527.895	521.468	534.321	1.02465	0.0351301	0.927953	1
98000083	9.81216	12.2958	7.32848	0.596012	-0.746586	0.312458	1
98000084	472.314	466.227	478.402	1.02611	0.037192	0.937097	1
98000085	166.013	217.269	114.756	0.528177	-0.920908	0.0618854	1
98000086	0.459119	0.341199	0.577039	1.69121	0.758055	1	1
98000087	6.6333	7.3063	5.96029	0.815774	-0.293759	0.755686	1
98000089	13.497	12.4856	14.5084	1.16201	0.216624	0.807657	1
98000093	0.756249	0.341199	1.1713	3.43289	1.77942	0.58988	1
98000094	333.984	309.505	358.464	1.15819	0.211868	0.594446	1
98000095	329.279	356.681	301.876	0.846345	-0.240682	0.55015	1
98000097	434.094	467.751	400.436	0.856088	-0.22417	0.561703	1
98000100	4.81287	4.83675	4.78899	0.990126	-0.0143159	0.997983	1
98000101	2.27184	2.40488	2.13879	0.889355	-0.169169	1	1
98000102	10198.1	10461.1	9935.16	0.949724	-0.0744196	0.816497	1
98000103	4.4316	6.23388	2.62932	0.421778	-1.24544	0.48922	1
98000104	2.08847	0.711383	3.46555	4.87157	2.28439	0.149928	1
98000105	18.8593	21.6968	16.0218	0.738441	-0.437445	0.547819	1
98000107	0.309232	0	0.618464	Inf	Inf	0.644972	1
98000108	1.6176	0.626422	2.60878	4.16456	2.05817	0.375756	1
98000109	1467.78	1276.2	1659.36	1.30023	0.378766	0.332562	1
98000110	4.38815	3.3725	5.40379	1.60231	0.680154	0.74268	1
98000111	371.004	496.985	245.023	0.493018	-1.02029	0.00658741	0.501392
98000112	2445.13	2033.36	2856.89	1.40501	0.490584	0.325555	1
98000113	0.480255	0	0.96051	Inf	Inf	0.447499	1
98000115	173.511	141.063	205.959	1.46005	0.546019	0.167658	1
98000117	35.1224	41.2416	29.0033	0.703252	-0.507886	0.593456	1
98000119	10.1895	12.1589	8.22004	0.676051	-0.564796	0.603794	1
98000120	8.22036	6.16142	10.2793	1.66833	0.738407	0.306576	1
98000121	1.71565	1.89376	1.53755	0.811903	-0.300621	0.952523	1
98000122	0.841226	0.355691	1.32676	3.73009	1.89921	0.617496	1
98000123	2.22176	2.20797	2.23554	1.01249	0.0179067	1	1
98000124	2.53727	0.69689	4.37765	6.2817	2.65115	0.0507309	1
98000125	5543.35	6043.99	5042.72	0.834336	-0.261299	0.497332	1
98000126	5.54297	5.84785	5.23809	0.89573	-0.158864	0.993172	1
98000127	10.6055	8.85152	12.3594	1.39631	0.481616	0.43324	1
98000128	0.804721	1.30882	0.300621	0.229689	-2.12225	0.575335	1
98000130	2.18373	3.4898	0.87766	0.251493	-1.99141	0.256097	1
98000133	0.138209	0	0.276418	Inf	Inf	1	1
98000134	210.455	239.611	181.299	0.756639	-0.402322	0.334925	1
98000135	1725.65	1755.98	1695.32	0.965453	-0.0507219	0.850469	1
98000136	23.6078	24.9085	22.307	0.895556	-0.159144	0.792186	1
98000138	0.519468	0.69689	0.342046	0.490818	-1.02674	0.958246	1
98000144	194.981	224.398	165.563	0.737808	-0.438683	0.266621	1
98000146	4.68182	7.5427	1.82095	0.241419	-2.05039	0.0207957	0.851379
98000148	1980.75	1893.04	2068.46	1.09266	0.127846	0.773234	1
98000149	1.01137	0.996606	1.02614	1.02963	0.0421305	1	1
98013757	29.3779	58.4137	0.342046	0.00585558	-7.41597	5.25996e-07	0.000452619
98000152	391.027	447.469	334.584	0.747724	-0.419422	0.498896	1
98000153	0.609853	0	1.21971	Inf	Inf	0.292405	1
98000155	0.4939	0.711383	0.276418	0.388564	-1.36378	0.970317	1
98000156	67.0241	61.9483	72.0998	1.16387	0.21893	0.616182	1
98000157	5.24943	5.13982	5.35905	1.04265	0.06026	1	1
98000158	3.7512	2.67896	4.82344	1.80049	0.848387	0.559725	1
98000160	9.36943	7.56834	11.1705	1.47595	0.561648	0.476967	1
98000162	6.13475	4.45742	7.81208	1.7526	0.809498	0.543554	1
98000163	9.33893	12.8939	5.78395	0.448579	-1.15657	0.0781763	1
98000164	0.616676	0.355691	0.87766	2.46747	1.30304	0.797158	1
98000165	7.33147	12.0784	2.58457	0.213983	-2.22443	0.0374048	1
98000166	2.40062	1.25284	3.5484	2.83228	1.50196	0.405309	1
98000167	2.99056	2.24945	3.73167	1.65892	0.730248	0.533804	1
98000169	4.60647	2.67561	6.53733	2.4433	1.28883	0.147798	1
98000170	986.563	1070.68	902.444	0.842869	-0.24662	0.492706	1
98000175	460.883	511.975	409.79	0.80041	-0.321188	0.380204	1
98000176	2.01184	1.56705	2.45663	1.56768	0.648629	0.767293	1
98000177	3.41194	3.92846	2.89543	0.737041	-0.440183	0.833311	1
98000178	810.782	756.874	864.689	1.14245	0.192128	0.600865	1
98000179	0.454263	0.355691	0.552835	1.55426	0.636223	1	1
98000180	0.320457	0.640915	0	0	#NAME?	0.628624	1
98000184	0.292922	0.285223	0.300621	1.05398	0.0758533	1	1
98000186	152.314	164.465	140.164	0.852242	-0.230664	0.567567	1
98000187	90.9463	82.1439	99.7488	1.21432	0.280147	0.541515	1
98046818	21.2977	42.319	0.276418	0.00653176	-7.25831	9.85934e-06	0.00503444
98000189	0.79631	0.355691	1.23693	3.47753	1.79806	0.636941	1
98000190	0.309232	0	0.618464	Inf	Inf	0.64407	1
98000191	451.564	536.595	366.533	0.683072	-0.54989	0.161924	1
98000192	131.931	124.413	139.45	1.12087	0.164614	0.781336	1
98000193	52.5827	62.3832	42.7822	0.685797	-0.544146	0.223044	1
98000199	0.812814	0.640915	0.984714	1.53642	0.619571	1	1
98000200	0.628777	0.355691	0.901863	2.53552	1.34228	0.814802	1
98000202	0.138209	0	0.276418	Inf	Inf	1	1
98000203	40.63	29.1175	52.1425	1.79076	0.840573	0.0598114	1
98000204	1.37491	0.911646	1.83817	2.01632	1.01172	0.698179	1
98000205	3.01358	2.52018	3.50698	1.39156	0.4767	0.835304	1
98000207	10.5674	10.2473	10.8875	1.06248	0.0874321	0.898284	1
98000212	8725.88	8346.22	9105.54	1.09098	0.125622	0.773341	1
98000214	1.55454	0.911646	2.19744	2.41041	1.26928	0.527777	1
98000215	36.0163	34.2186	37.814	1.10507	0.144143	0.733851	1
98000216	3.54643	3.95545	3.13741	0.793187	-0.334267	0.929976	1
98000217	0.751588	0.926138	0.577039	0.623059	-0.68256	0.964594	1
98000218	625.642	619.343	631.941	1.02034	0.0290501	0.977438	1
98000219	1.5702	1.87927	1.26113	0.671076	-0.575452	0.767333	1
98000222	0.585226	0.341199	0.829253	2.43041	1.2812	0.852005	1
98000224	1037.47	1042.98	1031.95	0.989423	-0.015341	0.924298	1
98000225	1.82519	0.640915	3.00947	4.69558	2.2313	0.286852	1
98000227	0.636964	0.69689	0.577039	0.828019	-0.272264	1	1
98000228	20.1488	20.6757	19.6219	0.949033	-0.0754695	1	1
98000229	6.33793	6.10409	6.57177	1.07662	0.106507	0.915293	1
98000233	203.455	188.213	218.697	1.16197	0.21657	0.592689	1
98000235	6816.99	8435.89	5198.09	0.616187	-0.698559	0.0600291	1
98000236	0.951476	0.341199	1.56175	4.57725	2.19448	0.502086	1
98000241	34.1635	47.9412	20.3859	0.425228	-1.23369	0.0117327	0.659233
98000242	0.45142	0.626422	0.276418	0.441264	-1.18029	0.967752	1
98000243	3.32594	1.53807	5.11382	3.32483	1.73328	0.139209	1
98000244	14.681	5.05486	24.3071	4.80867	2.26564	0.000549255	0.100878
98000246	532.684	485.415	579.954	1.19476	0.256718	0.51227	1
98000248	1986.19	2145.4	1826.98	0.851577	-0.231792	0.552222	1
98000250	0.997175	1.14089	0.853456	0.748059	-0.418776	0.951731	1
98000251	4.0842	5.58382	2.58457	0.462868	-1.11133	0.312545	1
98000253	71.5212	70.6762	72.3661	1.02391	0.0340882	0.962849	1
98000254	286.546	307.815	265.278	0.861808	-0.214562	0.550184	1
98000255	2.34078	4.12872	0.552835	0.1339	-2.90077	0.0500461	1
98000256	5.84955	1.72049	9.97862	5.79988	2.53602	0.0412411	1
98000257	0.606557	0.570447	0.642667	1.1266	0.171979	1	1
98000259	0.276418	0	0.552835	Inf	Inf	0.693009	1
98000260	441.18	499.345	383.015	0.767034	-0.382637	0.312878	1
98000261	1781.68	1617.42	1945.94	1.20311	0.266771	0.49292	1
98000263	1.49405	1.06707	1.92102	1.80027	0.848212	0.7136	1
98000265	1.01777	1.6935	0.342046	0.201976	-2.30774	0.365987	1
98000266	180.693	230.745	130.642	0.566175	-0.820681	0.0465728	1
98000267	18.6211	21.1097	16.1326	0.764227	-0.387927	0.732075	1
98000270	2.49651	2.04919	2.94384	1.43659	0.522647	0.710366	1
98000272	1.32021	1.37929	1.26113	0.914335	-0.129205	1	1
98000273	888.091	912.214	863.967	0.94711	-0.0783968	0.870652	1
98000275	1306.92	1550.41	1063.43	0.685903	-0.543924	0.1659	1
98000277	0.74147	1.14089	0.342046	0.299806	-1.7379	0.53807	1
98000278	0.177846	0.355691	0	0	#NAME?	0.976809	1
98000282	408.131	365.889	450.372	1.2309	0.299712	0.438008	1
98000284	1724.27	1787	1661.55	0.929797	-0.105012	0.782268	1
98000285	600.686	617.981	583.392	0.94403	-0.0830958	0.83776	1
98000286	1.28782	1.03809	1.53755	1.48113	0.566702	0.862987	1
98000287	2.33014	1.26734	3.39294	2.67722	1.42074	0.37012	1
98000288	1.44538	1.05258	1.83817	1.74634	0.804338	0.736882	1
98000289	0.486654	0.69689	0.276418	0.396644	-1.33408	0.966505	1
98000290	253.55	295.43	211.671	0.716483	-0.480996	0.290479	1
98000291	1.12359	1.3523	0.894881	0.661749	-0.595644	0.953139	1
98000293	0.585226	0.341199	0.829253	2.43041	1.2812	0.768598	1
98000296	278.157	267.128	289.186	1.08258	0.114469	0.773259	1
98000297	60.2111	66.8803	53.5419	0.800562	-0.320914	0.43315	1
98000300	1.1027	0.626422	1.57897	2.52062	1.33378	0.646308	1
98000301	1.14276	0.640915	1.6446	2.56602	1.35953	0.693137	1
98000302	0.309232	0	0.618464	Inf	Inf	0.655516	1
98000303	0.484234	0.626422	0.342046	0.546031	-0.872944	0.970784	1
98000304	45.4973	59.3068	31.6877	0.534302	-0.904272	0.0520973	1
98000305	0.769034	1.53807	0	0	#NAME?	0.172644	1
98000306	427.48	386.768	468.192	1.21052	0.27563	0.482362	1
98000308	3.15515	1.3523	4.95801	3.66636	1.87435	0.394691	1
98000310	0.633669	1.26734	0	0	#NAME?	0.270443	1
98000311	4.55974	8.29022	0.829253	0.100028	-3.32153	0.107156	1
98000312	0.341199	0.682398	0	0	#NAME?	0.584588	1
98000313	1.88179	0.982114	2.78146	2.83211	1.50188	0.381829	1
98000314	0.939374	0.341199	1.53755	4.50631	2.17195	0.48791	1
98000316	1.35397	2.70795	0	0	#NAME?	0.271914	1
98000317	0.792619	1.30882	0.276418	0.211196	-2.24335	0.489048	1
98000324	1.30385	1.77846	0.829253	0.466277	-1.10074	0.898196	1
98000325	0.657677	0.69689	0.618464	0.887462	-0.172242	1	1
98000326	2.21607	2.74943	1.68271	0.612021	-0.708347	0.664485	1
98000327	0	0	0	NA	NA	NA	NA
98000328	0.578146	0.85567	0.300621	0.351328	-1.50911	0.752119	1
98000330	11.0387	15.0044	7.07288	0.471386	-1.08502	0.176465	1
98000332	0.138209	0	0.276418	Inf	Inf	1	1
98000337	1.00158	1.42612	0.577039	0.404622	-1.30535	0.554403	1
98000338	0.8942	1.21136	0.577039	0.476355	-1.06989	0.76853	1
98000339	35.9468	35.2546	36.639	1.03927	0.0555666	0.879232	1
98000343	0.512646	0.341199	0.684093	2.00497	1.00358	1	1
98000344	1.10816	0.996606	1.21971	1.22386	0.291438	1	1
98000346	1067.37	1079.48	1055.27	0.977571	-0.0327262	0.897766	1
98000348	0.308808	0.341199	0.276418	0.810136	-0.303764	1	1
98000350	308.766	302.969	314.562	1.03827	0.0541752	0.887197	1
98000351	522.444	595.093	449.795	0.75584	-0.403846	0.303451	1
98000352	8.90558	13.1087	4.70248	0.35873	-1.47903	0.0379446	1
98000353	1.19482	1.21136	1.17828	0.972691	-0.0399466	1	1
98000355	0.806623	0.711383	0.901863	1.26776	0.342282	1	1
98000356	1086.79	1095.51	1078.06	0.984078	-0.0231561	0.964999	1
98000357	1.58644	0.626422	2.54647	4.06509	2.02329	0.307117	1
98000358	0.519045	1.03809	0	0	#NAME?	0.349952	1
98000360	303.768	357.25	250.287	0.700595	-0.513347	0.452646	1
98000361	1.84408	2.3614	1.32676	0.561853	-0.831736	0.620838	1
98000362	1.80945	2.67561	0.943288	0.352551	-1.5041	0.346682	1
98000363	1.99448	1.76732	2.22164	1.25707	0.330066	1	1
98000364	1.96115	2.7026	1.21971	0.451308	-1.14782	0.498117	1
98000365	3.01075	2.98782	3.03367	1.01534	0.02197	1	1
98000367	3.23024	3.95545	2.50504	0.633314	-0.659006	0.594815	1
98000369	5.93707	3.5023	8.37184	2.39039	1.25724	0.218661	1
98000370	159.838	149.942	169.734	1.132	0.17887	0.595742	1
98000371	515.452	560.065	470.839	0.840686	-0.250361	0.514289	1
98000373	0.624863	0.69689	0.552835	0.793289	-0.334082	1	1
98000375	1.74892	1.59404	1.9038	1.19432	0.25619	1	1
98000376	2.57382	2.39039	2.75725	1.15348	0.205988	0.938177	1
98000378	1.62892	0.711383	2.54647	3.5796	1.8398	0.253288	1
98000379	0.590052	0.285223	0.894881	3.13748	1.6496	0.814897	1
98000381	5.21946	2.46085	7.97806	3.24199	1.69688	0.178131	1
98000383	3613.08	3760.81	3465.34	0.921434	-0.118047	0.754167	1
98000385	0.835947	0.711383	0.96051	1.3502	0.433175	1	1
98000386	1.30562	0.341199	2.27005	6.65315	2.73404	0.251118	1
98000387	0.471644	0	0.943288	Inf	Inf	0.441868	1
98000388	978.516	987.654	969.378	0.981495	-0.0269468	0.971659	1
98000391	0.910474	0	1.82095	Inf	Inf	0.0832097	1
98000392	0.630142	0.341199	0.919085	2.69369	1.42959	0.806392	1
98000394	0.752465	0.285223	1.21971	4.27632	2.09637	0.572351	1
98000396	78.0849	75.7184	80.4514	1.06251	0.0874729	0.869349	1
98000398	169.062	156.677	181.447	1.15809	0.211751	0.607112	1
98000400	7.49544	4.13786	10.853	2.62285	1.39114	0.0669557	1
98000401	13.6746	13.0237	14.3255	1.09996	0.137449	0.809012	1
98000402	1.68755	2.39039	0.984714	0.411947	-1.27947	0.573175	1
98000404	0.138209	0	0.276418	Inf	Inf	1	1
98000405	0.177846	0.355691	0	0	#NAME?	0.975957	1
98000408	1.20528	2.13415	0.276418	0.129521	-2.94874	0.428015	1
98000409	143.313	127.832	158.794	1.24221	0.312914	0.448062	1
98000410	2857.2	3034.07	2680.33	0.883413	-0.17884	0.644585	1
98000412	871.486	936.024	806.948	0.862101	-0.21407	0.612034	1
98000413	2.20167	2.47535	1.928	0.778881	-0.360524	0.938399	1
98000414	866.03	942.738	789.321	0.837264	-0.256245	0.490008	1
98000415	1.73742	1.97872	1.49612	0.756107	-0.403338	0.946101	1
98000417	0.342046	0	0.684093	Inf	Inf	0.659043	1
98000419	0.805992	0.285223	1.32676	4.65165	2.21774	0.569167	1
98000420	0.951023	0.640915	1.26113	1.9677	0.976514	0.821594	1
98000421	18.0018	24.4079	11.5958	0.475082	-1.07375	0.0566594	1
98000425	0.78864	0.682398	0.894881	1.31138	0.391084	1	1
98000427	8.22001	6.90713	9.5329	1.38015	0.464827	0.615936	1
98000431	1.62787	0.626422	2.62932	4.19735	2.06948	0.4258	1
98000433	57.302	73.6289	40.9751	0.556508	-0.845526	0.0514597	1
98000435	0.950147	1.28183	0.618464	0.482485	-1.05144	0.750691	1
98000436	1.11389	0.341199	1.88658	5.52926	2.46709	0.275243	1
98000437	5.0686	3.15775	6.97945	2.21026	1.14422	0.353271	1
98000440	22.0269	23.3361	20.7177	0.887793	-0.171705	0.927324	1
98000443	61.5397	78.155	44.9244	0.574812	-0.798837	0.144371	1
98000444	3.01936	3.10512	2.9336	0.944762	-0.0819775	1	1
98000445	3.81874	2.27844	5.35905	2.35207	1.23393	0.231396	1
98000449	1.92474	1.49659	2.3529	1.57218	0.652765	0.918613	1
98000450	0.657677	0.69689	0.618464	0.887462	-0.172242	1	1
98000452	928.969	789.529	1068.41	1.35322	0.436399	0.26899	1
98000454	271.056	275.269	266.843	0.96939	-0.0448516	0.924904	1
98041215	113.53	223.364	3.69688	0.016551	-5.91694	1.42551e-11	4.41594e-08
98000457	2.36119	1.66451	3.05788	1.8371	0.877431	0.468754	1
98000459	5.03333	4.56937	5.49729	1.20307	0.266725	0.823873	1
98000460	6.48801	7.01573	5.96029	0.849561	-0.235211	0.892955	1
98000461	398.789	385.433	412.145	1.0693	0.096672	0.771154	1
98000462	0	0	0	NA	NA	NA	NA
98000464	0.891357	1.48209	0.300621	0.202836	-2.30162	0.453989	1
98000465	1.18366	1.53807	0.829253	0.539152	-0.891236	0.797084	1
98000466	0.348445	0.69689	0	0	#NAME?	0.584533	1
98000468	286.687	272.296	301.077	1.1057	0.144955	0.725614	1
98000469	475.228	489.74	460.716	0.940736	-0.0881379	0.899684	1
98000470	6.41217	6.22138	6.60296	1.06133	0.085877	0.94829	1
98000471	0.443233	0.285223	0.601242	2.10797	1.07585	1	1
98000472	868.973	726.118	1011.83	1.39348	0.478687	0.245678	1
98000473	4.15837	0	8.31673	Inf	Inf	0.350991	1
98000474	1.25569	2.23496	0.276418	0.123679	-3.01533	0.178432	1
98000475	169.902	203.726	136.077	0.667941	-0.582208	0.17271	1
98000476	109.41	136.511	82.3096	0.602952	-0.729884	0.154072	1
98000478	0.604574	0.355691	0.853456	2.39943	1.26269	0.764891	1
98000481	0.77628	1.55256	0	0	#NAME?	0.166211	1
98000482	766.627	1039.96	493.296	0.474343	-1.076	0.140795	1
98000484	0.171023	0	0.342046	Inf	Inf	1	1
98000485	880.649	864.834	896.464	1.03657	0.0518221	0.915616	1
98000486	3.55165	3.51679	3.58651	1.01982	0.0283212	1	1
98000487	2339.87	2095.28	2584.45	1.23346	0.302709	0.430458	1
98000488	1.60139	0.355691	2.84709	8.00437	3.00079	0.129391	1
98000494	1.61819	0.69689	2.53948	3.64402	1.86553	0.307582	1
98000496	3466.35	2581.99	4350.72	1.68502	0.752769	0.0550359	1
98000497	3.67857	4.31648	3.04065	0.704429	-0.505475	0.662857	1
98000498	4.84906	5.0785	4.61963	0.909645	-0.136624	1	1
98000499	0.480255	0	0.96051	Inf	Inf	0.397221	1
98000500	1.59382	0.285223	2.90241	10.1759	3.34709	0.100697	1
98000501	67.1079	90.3966	43.8191	0.484743	-1.04471	0.0294787	0.984951
98000503	1.69934	2.17898	1.21971	0.559759	-0.837122	0.680134	1
98000504	564.871	535.123	594.619	1.11118	0.152095	0.69525	1
98000505	481.165	496.136	466.194	0.939649	-0.0898062	0.83434	1
98000509	15.4712	13.1825	17.7599	1.34723	0.430001	0.47545	1
98000511	0.767898	0.640915	0.894881	1.39626	0.481564	1	1
98000512	1.51796	1.05258	1.98333	1.88425	0.913992	0.594074	1
98000513	0.589629	0.626422	0.552835	0.882528	-0.180286	1	1
98000515	3.2428	2.24945	4.23616	1.8832	0.913183	0.443302	1
98000516	0.624863	0.69689	0.552835	0.793289	-0.334082	1	1
98000520	1.21636	2.09067	0.342046	0.163606	-2.6117	0.17836	1
98000521	768.202	813.749	722.654	0.888055	-0.171279	0.641411	1
98000524	18.2288	14.1646	22.293	1.57385	0.654298	0.236227	1
98000527	2.07313	0	4.14626	Inf	Inf	0.469867	1
98000528	11.3214	15.6184	7.02454	0.449762	-1.15277	0.306111	1
98000529	0.704137	1.40827	0	0	#NAME?	0.323028	1
98000530	1.38943	0.982114	1.79674	1.82947	0.871423	0.691934	1
98000531	209.678	272.79	146.565	0.537282	-0.896248	0.0260637	0.936334
98000532	6.07855	3.08728	9.06983	2.93781	1.55474	0.129404	1
98000533	0.138209	0	0.276418	Inf	Inf	1	1
98000535	0.479831	0.341199	0.618464	1.81262	0.858076	1	1
98000536	0.616676	0.355691	0.87766	2.46747	1.30304	0.734262	1
98000539	126.08	137.592	114.569	0.832673	-0.264177	0.564476	1
98000540	112.148	148.126	76.17	0.514225	-0.959528	0.0216159	0.872746
98000544	0.735536	0.341199	1.12987	3.31148	1.72748	0.571757	1
98000545	2.73831	3.61425	1.86237	0.515287	-0.956553	0.4164	1
98000546	8.16642	0	16.3328	Inf	Inf	0.378587	1
98000548	1.77487	1.3523	2.19744	1.62497	0.70041	0.806568	1
98000549	0.342046	0	0.684093	Inf	Inf	0.743323	1
98033981	9.31988	18.0627	0.577039	0.0319464	-4.9682	2.21849e-07	0.000229081
98000553	2.55532	1.6935	3.41714	2.0178	1.01279	0.464121	1
98000554	1.56424	1.03809	2.09038	2.01368	1.00984	0.564245	1
98000555	155.545	173.337	137.754	0.794714	-0.331491	0.482994	1
98000556	1.22417	1.25284	1.1955	0.95423	-0.0675904	1	1
98000557	1.05798	1.19687	0.919085	0.767908	-0.380996	0.952905	1
98000558	1.2488	0.911646	1.58596	1.73966	0.798807	0.869294	1
98000559	90.4312	105.522	75.3404	0.713979	-0.486047	0.546558	1
98000562	5883.03	5707.37	6058.7	1.06156	0.0861802	0.850196	1
98000563	5.19055	4.21368	6.16742	1.46367	0.549586	0.583214	1
98000564	85.7459	112.953	58.5384	0.518253	-0.94827	0.0317127	1
98000565	587.268	565.02	609.515	1.07875	0.109358	0.756584	1
98000567	65.7522	67.9351	63.5693	0.935735	-0.095828	0.879058	1
98000569	0.826912	1.05258	0.601242	0.571207	-0.807914	0.968513	1
98000570	120.943	125.882	116.004	0.921529	-0.117898	0.770668	1
98000571	1.2918	1.66451	0.919085	0.552165	-0.856829	0.745691	1
98000573	2.12673	3.33437	0.919085	0.27564	-1.85914	0.147535	1
98000574	0.609853	0	1.21971	Inf	Inf	0.280277	1
98000575	847.996	928.945	767.047	0.825718	-0.276279	0.448843	1
98000576	0.479831	0.341199	0.618464	1.81262	0.858076	1	1
98000577	18.3766	16.3257	20.4274	1.25124	0.323356	0.600841	1
98000578	0.760228	0.967621	0.552835	0.571334	-0.807593	0.969848	1
98000579	384.259	385.643	382.875	0.992822	-0.0103931	0.901352	1
98000580	4565.33	4473.42	4657.24	1.04109	0.0580984	0.84748	1
98000581	0.552835	0	1.10567	Inf	Inf	0.576519	1
98000583	0.487078	0.355691	0.618464	1.73877	0.798063	1	1
98000585	1871.71	1802.77	1940.64	1.07647	0.106315	0.774331	1
98000586	0.655257	0.626422	0.684093	1.09206	0.127056	1	1
98000587	167.282	129.303	205.26	1.58744	0.666699	0.0807063	1
98000589	1.19371	0.355691	2.03174	5.71208	2.51402	0.261318	1
98000590	7.75096	4.41059	11.0913	2.5147	1.33039	0.0476601	1
98000592	5.09514	5.91967	4.2706	0.721425	-0.471079	0.763696	1
98000593	232.685	217.406	247.963	1.14055	0.189734	0.6401	1
98000594	185.069	194.465	175.672	0.903363	-0.146623	0.749146	1
98000595	2.17713	1.33781	3.01645	2.25478	1.17298	0.421758	1
98000596	1.36721	1.19687	1.53755	1.28464	0.361367	1	1
98000597	97.0844	47.5112	146.658	3.0868	1.62611	0.0322544	1
98000599	1.36734	0.682398	2.05228	3.00745	1.58854	0.715058	1
98000600	1.9925	1.55256	2.43243	1.56672	0.647749	0.790757	1
98000602	0.590052	0.285223	0.894881	3.13748	1.6496	0.812847	1
98000603	3.66076	2.60514	4.71638	1.81041	0.856318	0.421554	1
98000607	1894.02	1775.08	2012.96	1.13401	0.181434	0.641488	1
98000608	1.0661	0.570447	1.56175	2.73777	1.453	0.679926	1
98000611	0.492357	0	0.984714	Inf	Inf	0.432658	1
98000612	1.54616	2.40823	0.684093	0.284064	-1.81571	0.229776	1
98000613	1.2816	1.06707	1.49612	1.40208	0.487569	0.874941	1
98000614	0.805992	0.285223	1.32676	4.65165	2.21774	0.617741	1
98000618	0.835523	1.05258	0.618464	0.587569	-0.767171	0.968069	1
98000620	3.63673	4.7373	2.53617	0.535361	-0.901415	0.62011	1
98000621	3.58795	2.63213	4.54376	1.72627	0.787654	0.485614	1
98000622	0.815234	0.711383	0.919085	1.29197	0.369572	1	1
98000623	0.629718	0.682398	0.577039	0.845604	-0.241945	1	1
98000628	0.491057	0.982114	0	0	#NAME?	0.361293	1
98000629	185.067	212.088	158.045	0.745185	-0.424329	0.316871	1
98000631	9.48357	13.28	5.68719	0.428254	-1.22346	0.0547714	1
98000632	0.589629	0.626422	0.552835	0.882528	-0.180286	1	1
98000633	1.80004	1.72049	1.8796	1.09248	0.127605	1	1
98000634	643.648	590.608	696.689	1.17961	0.238312	0.548944	1
98000635	1.0419	0.570447	1.51335	2.65291	1.40758	0.639489	1
98000636	4.67833	5.93951	3.41714	0.575324	-0.797553	0.362167	1
98000637	2.69479	2.23496	3.15463	1.41149	0.497222	0.734987	1
98000638	2.40984	1.63752	3.18215	1.94327	0.958489	0.570678	1
98000639	12.396	5.48102	19.311	3.52325	1.8169	0.00505111	0.422901
98000641	172.614	172.862	172.365	0.997122	-0.00415778	0.986832	1
98000642	0.894458	0.341199	1.44772	4.24303	2.08509	0.369735	1
98000643	4.79168	5.09498	4.48837	0.880939	-0.182885	1	1
98000644	1353.73	1491.72	1215.75	0.815002	-0.295124	0.45269	1
98000645	10.5169	4.58386	16.45	3.58868	1.84345	0.00761019	0.53742
98000649	0.478467	0.355691	0.601242	1.69035	0.75732	1	1
98000650	1178.51	1150.46	1206.56	1.04876	0.0686843	0.847495	1
98000651	238.031	269.144	206.918	0.768802	-0.379315	0.337819	1
98000652	0.621955	0	1.24391	Inf	Inf	0.247017	1
98000653	1.26267	0.711383	1.81397	2.54992	1.35045	0.527288	1
98000655	37.6988	19.2741	56.1235	2.91186	1.54194	0.00243315	0.27113
98000656	1.71609	1.74947	1.68271	0.961838	-0.0561339	1	1
98000657	2.55681	1.32331	3.79031	2.86426	1.51816	0.396078	1
98000658	2.11137	1.6935	2.52924	1.4935	0.578701	0.840297	1
98000661	123.915	114.862	132.967	1.15762	0.211167	0.577743	1
98000662	0.598435	1.19687	0	0	#NAME?	0.199046	1
98000664	0.934095	0.69689	1.1713	1.68075	0.749106	0.832906	1
98000665	0.767898	0.640915	0.894881	1.39626	0.481564	1	1
98000667	2.39789	1.28183	3.51396	2.74136	1.45489	0.430751	1
98000669	1.63183	1.40827	1.85539	1.31749	0.397797	0.897309	1
98000670	1.85628	1.96423	1.74834	0.890089	-0.167978	1	1
98000671	2.52358	1.62303	3.42413	2.10971	1.07705	0.421542	1
98000673	220.459	194.752	246.166	1.264	0.337994	0.460831	1
98000676	14.8067	16.2968	13.3166	0.81713	-0.291363	0.790341	1
98000678	171.287	228.524	114.049	0.499069	-1.00269	0.012151	0.66753
98000680	0.789487	0	1.57897	Inf	Inf	0.296632	1
98000681	0.564937	0	1.12987	Inf	Inf	0.232319	1
98000683	609.521	593.98	625.061	1.05233	0.0735807	0.85182	1
98000684	1.99576	3.34886	0.642667	0.191906	-2.38153	0.177106	1
98000686	0.300621	0	0.601242	Inf	Inf	0.666101	1
98000687	1.00015	0.355691	1.6446	4.62368	2.20904	0.617807	1
98000688	675.767	641.784	709.751	1.1059	0.145226	0.760826	1
98000689	662.321	599.366	725.276	1.21007	0.275091	0.457763	1
98000690	5688.39	6652.79	4723.99	0.710076	-0.493955	0.190066	1
98000691	76.8544	87.9384	65.7703	0.747913	-0.419057	0.369241	1
98000693	0.316055	0.355691	0.276418	0.777128	-0.363777	1	1
98000694	309.826	277.891	341.76	1.22983	0.298464	0.44413	1
98000696	2.88216	1.99122	3.77309	1.89487	0.922097	0.522962	1
98000697	44.7692	50.7573	38.781	0.764049	-0.388262	0.41103	1
98000698	554.463	544.72	564.205	1.03577	0.0507052	0.926766	1
98000699	1.46732	1.55256	1.38209	0.890199	-0.1678	1	1
98000700	1.99958	1.03809	2.96106	2.85242	1.51218	0.316425	1
98000702	76.2372	49.7611	102.713	2.06413	1.04553	0.014178	0.713768
98000704	994.482	1169.1	819.866	0.701281	-0.511935	0.181486	1
98000705	74.6882	82.6869	66.6895	0.80653	-0.310199	0.564029	1
98000706	2.2975	4.595	0	0	#NAME?	0.0157262	0.752838
98000707	5.57087	4.70116	6.44058	1.37	0.454173	0.739706	1
98000713	0.963577	0.341199	1.58596	4.64819	2.21667	0.408411	1
98000714	9.35487	4.4048	14.3049	3.24759	1.69937	0.284982	1
98000716	58.5787	43.6749	73.4826	1.68249	0.7506	0.0976775	1
98000717	117.887	121.589	114.184	0.939097	-0.0906545	0.882856	1
98000718	0.792978	0	1.58596	Inf	Inf	0.281478	1
98000721	0.280821	0.285223	0.276418	0.969126	-0.0452432	1	1
98000722	1.01337	1.40827	0.618464	0.439165	-1.18717	0.729402	1
98000723	1.3769	1.32331	1.43049	1.081	0.11236	1	1
98000724	65.7605	76.4793	55.0416	0.719693	-0.474547	0.275892	1
98000725	0.491057	0.982114	0	0	#NAME?	0.407703	1
98000726	0.463069	0.926138	0	0	#NAME?	0.351116	1
98000727	1.77975	1.37929	2.18022	1.58068	0.660547	0.762046	1
98000728	23.7405	21.9366	25.5444	1.16446	0.219667	0.643725	1
98000730	1.45512	1.94973	0.96051	0.492636	-1.02141	0.612884	1
98000731	2.58552	1.05258	4.11846	3.91272	1.96817	0.359471	1
98000734	1.56466	0.69689	2.43243	3.49041	1.80339	0.501965	1
98000737	31.6501	30.0918	33.2084	1.10357	0.142174	0.729241	1
98031549	13.1977	25.4935	0.901863	0.0353762	-4.82108	7.21911e-07	0.000569828
98000744	2094.95	2307.37	1882.53	0.815879	-0.293573	0.442616	1
98000745	0.636964	0.69689	0.577039	0.828019	-0.272264	1	1
98000748	0.138209	0	0.276418	Inf	Inf	1	1
98000749	1.4437	0.85567	2.03174	2.37444	1.24759	0.681516	1
98000750	2.16415	1.97872	2.34958	1.18742	0.247835	0.920612	1
98000751	302.221	345.323	259.118	0.750362	-0.41434	0.404083	1
98000752	488.876	394.427	583.325	1.47892	0.564541	0.135914	1
98000753	1.45884	1.03809	1.8796	1.81063	0.856492	0.73888	1
98000758	13.007	4.45742	21.5566	4.83613	2.27385	0.297647	1
98000759	10.8	9.42396	12.1761	1.29204	0.369648	0.575507	1
98000761	3018.5	3160.55	2876.44	0.910109	-0.135889	0.69604	1
98000762	0.552835	0	1.10567	Inf	Inf	0.420055	1
98000763	0.498756	0.69689	0.300621	0.431375	-1.21299	0.971471	1
98000764	0.519892	0.355691	0.684093	1.92328	0.943565	1	1
98000765	1.26753	0.69689	1.83817	2.63767	1.39927	0.489785	1
98000766	0.812843	0.682398	0.943288	1.38231	0.467086	1	1
98000768	141.492	129.389	153.595	1.18708	0.247421	0.588298	1
98000770	747.932	493.016	1002.85	2.03411	1.02439	0.0683082	1
98000773	336.562	326.913	346.211	1.05903	0.0827463	0.85505	1
98000774	4.21857	4.63984	3.7973	0.818411	-0.289102	0.914752	1
98000775	17.3261	14.961	19.6912	1.31617	0.396347	0.49767	1
98000777	2.28542	1.83778	2.73305	1.48714	0.572545	0.805933	1
98000781	3.73734	5.67793	1.79674	0.316444	-1.65998	0.293414	1
98000782	0.622443	0.626422	0.618464	0.987295	-0.0184463	1	1
98000783	4.77265	4.82561	4.7197	0.978053	-0.0320155	1	1
98000784	0.308808	0.341199	0.276418	0.810136	-0.303764	1	1
98000787	343.877	407.64	280.113	0.687158	-0.541286	0.156272	1
98000789	0.308808	0.341199	0.276418	0.810136	-0.303764	1	1
98000790	0.313635	0.285223	0.342046	1.19922	0.262099	1	1
98000791	2.84762	1.74947	3.94578	2.25541	1.17339	0.303853	1
98000793	1.15598	1.6935	0.618464	0.365199	-1.45324	0.63921	1
98000794	3.62234	2.74608	4.49861	1.63819	0.712107	0.505376	1
98000795	0.622019	0.967621	0.276418	0.285667	-1.80759	0.707421	1
98000796	0.491481	0.640915	0.342046	0.533684	-0.905941	0.969496	1
98000797	0.498756	0.69689	0.300621	0.431375	-1.21299	0.969269	1
98000799	1.06463	1.0236	1.10567	1.08018	0.111274	1	1
98000800	0	0	0	NA	NA	NA	NA
98000801	0.479408	0.682398	0.276418	0.405068	-1.30376	0.972165	1
98000802	5.26828	4.21368	6.32288	1.50056	0.585501	0.603258	1
98000805	0.585226	0.341199	0.829253	2.43041	1.2812	0.810347	1
98000807	22.9506	23.0146	22.8865	0.994436	-0.00804893	1	1
98000809	0.772301	0.926138	0.618464	0.667788	-0.582538	0.961559	1
98000812	3.76299	2.77841	4.74757	1.70873	0.772926	0.535191	1
98000813	2.94791	1.59404	4.30179	2.69866	1.43224	0.303366	1
98000814	0.300621	0	0.601242	Inf	Inf	0.657963	1
98000815	130.513	149.678	111.348	0.74392	-0.426781	0.448804	1
98000816	2.41828	0.341199	4.49535	13.1752	3.71975	0.022854	0.890143
98000817	297.949	279.287	316.61	1.13364	0.18096	0.62015	1
98000819	0.78864	0.682398	0.894881	1.31138	0.391084	1	1
98000821	0.519892	0.355691	0.684093	1.92328	0.943565	1	1
98000822	0	0	0	NA	NA	NA	NA
98000823	2966.58	3543.99	2389.16	0.674145	-0.568868	0.280015	1
98000824	442.312	481.941	402.684	0.835546	-0.259209	0.489416	1
98000825	1.77564	1.26734	2.28395	1.80217	0.849731	0.690581	1
98000826	0.348445	0.69689	0	0	#NAME?	0.594416	1
98000827	1.19164	1.42277	0.96051	0.675101	-0.566825	0.979329	1
98000828	0.321334	0	0.642667	Inf	Inf	0.696964	1
98000829	5427.94	5302.12	5553.76	1.04746	0.0668962	0.892502	1
98000830	0.991665	0	1.98333	Inf	Inf	0.121435	1
98000831	3.58817	2.76057	4.41576	1.59958	0.677695	0.459437	1
98000832	1.32546	0.982114	1.66881	1.6992	0.764854	0.87051	1
98000834	224.057	239.174	208.941	0.873593	-0.194967	0.618536	1
98000835	190.383	210.811	169.956	0.806197	-0.310796	0.426191	1
98000838	2.26942	2.33441	2.20442	0.944315	-0.08266	1	1
98000841	1.63055	2.23496	1.02614	0.459131	-1.12302	0.469207	1
98000844	3.75401	3.89032	3.61769	0.929921	-0.10482	0.927661	1
98000845	527.641	68.6473	986.634	14.3725	3.84524	0.000988589	0.156248
98000846	392.595	409.655	375.536	0.916714	-0.125457	0.71874	1
98000848	0.499179	0.355691	0.642667	1.80681	0.853446	1	1
98000849	4.65355	5.90718	3.39992	0.575558	-0.796967	0.404018	1
98000850	0.609429	0.341199	0.87766	2.57228	1.36305	0.789869	1
98000851	211.287	131.719	290.854	2.20814	1.14283	0.00432783	0.390488
98000853	0.907667	1.19687	0.618464	0.516735	-0.952504	0.77782	1
98000854	2.16657	2.04919	2.28395	1.11456	0.156479	0.927286	1
98000855	463.791	607.341	320.24	0.527282	-0.923352	0.146296	1
98000856	3.42185	4.46992	2.37378	0.531058	-0.91306	0.411837	1
98000857	12.4253	9.68555	15.165	1.56573	0.646838	0.316973	1
98000858	342.677	440.648	244.706	0.555333	-0.848576	0.0350867	1
98000859	12.4124	15.1501	9.6748	0.638597	-0.647022	0.285793	1
98000860	0.926848	0.682398	1.1713	1.71645	0.779425	0.807642	1
98000861	109.926	90.2564	129.595	1.43586	0.521912	0.184336	1
98000862	2.04071	0.982114	3.0993	3.15575	1.65798	0.344257	1
98000863	2.38431	1.53807	3.23056	2.1004	1.07066	0.536071	1
98000864	1.43131	0.682398	2.18022	3.19493	1.67579	0.397721	1
98000866	0.463945	0.285223	0.642667	2.25321	1.17198	1	1
98000867	0.759287	0.640915	0.87766	1.36939	0.453529	1	1
98000868	1056.06	952.689	1159.44	1.21702	0.283347	0.490197	1
98000870	0.775597	0.355691	1.1955	3.36107	1.74892	0.630984	1
98000873	4.87712	4.69581	5.05843	1.07722	0.107314	0.914043	1
98000876	86.1901	93.2154	79.1648	0.849267	-0.23571	0.542659	1
98000877	192.127	182.375	201.879	1.10694	0.146581	0.715376	1
98000879	2.7323	0.285223	5.17938	18.159	4.18262	0.141019	1
98000883	1189.81	1076.49	1303.14	1.21055	0.275664	0.488936	1
98000884	1.53053	1.48209	1.57897	1.06537	0.0913518	1	1
98000886	7.41215	5.73725	9.08705	1.58387	0.663452	0.419396	1
98000887	7.46872	8.79754	6.13989	0.69791	-0.518886	0.647358	1
98000889	1143.91	1239.04	1048.77	0.846434	-0.240531	0.556584	1
98000890	0.740363	0.285223	1.1955	4.19146	2.06745	0.673801	1
98000891	0.499179	0.355691	0.642667	1.80681	0.853446	1	1
98000892	4.29957	1.26734	7.33179	5.7852	2.53237	0.0584946	1
98000893	0.491933	0.341199	0.642667	1.88356	0.913459	1	1
98000895	3.51011	6.16677	0.853456	0.138396	-2.85312	0.168578	1
98000898	1.59705	1.03809	2.15601	2.07691	1.05444	0.571209	1
98000900	0.885847	0.341199	1.43049	4.19255	2.06783	0.465986	1
98000901	0.608977	0.640915	0.577039	0.900336	-0.151465	1	1
98000902	0.316055	0.355691	0.276418	0.777128	-0.363777	1	1
98000903	0.773177	0.285223	1.26113	4.42156	2.14455	0.602795	1
98000904	2.53707	1.65002	3.42413	2.0752	1.05325	0.480932	1
98000905	2.52497	1.65002	3.39992	2.06054	1.04302	0.451635	1
98000906	2.9609	1.83778	4.08401	2.22225	1.15202	0.401278	1
98000907	460.099	461.362	458.836	0.994525	-0.00792106	0.976989	1
98000909	0.792554	0.341199	1.24391	3.6457	1.8662	0.657816	1
98000910	0.882098	1.21136	0.552835	0.456375	-1.13171	0.77669	1
98000911	59.2208	83.7408	34.7008	0.414383	-1.27096	0.00524514	0.436003
98000913	0.435534	0.570447	0.300621	0.526992	-0.924147	0.967672	1
98000914	0.170599	0.341199	0	0	#NAME?	0.97439	1
98000915	5.92808	7.68563	4.17053	0.54264	-0.881934	0.31656	1
98000918	82.2743	76.3303	88.2182	1.15574	0.20882	0.720217	1
98000919	0.443233	0.285223	0.601242	2.10797	1.07585	1	1
98000920	1.8966	3.51679	0.276418	0.0785994	-3.66934	0.0750268	1
98000922	16.9231	14.2621	19.5841	1.37316	0.457501	0.421619	1
98000924	0.926425	1.0236	0.829253	0.810136	-0.303764	1	1
98000925	537.116	361.317	712.914	1.9731	0.980462	0.0113025	0.646795
98000927	0.969316	0.570447	1.36819	2.39844	1.2621	0.799313	1
98000928	1.03949	0.69689	1.38209	1.98322	0.987846	0.803451	1
98000931	329.147	359.756	298.538	0.829833	-0.269108	0.507429	1
98000932	0.933671	1.03809	0.829253	0.798826	-0.324047	1	1
98000935	18.3427	14.8726	21.8127	1.46663	0.552506	0.360101	1
98000938	2.55639	1.62303	3.48975	2.15015	1.10444	0.463955	1
98000940	0.938009	0.355691	1.52033	4.27429	2.09568	0.384567	1
98000942	0.590052	0.285223	0.894881	3.13748	1.6496	0.801546	1
98000943	674.639	721.242	628.036	0.87077	-0.199636	0.61238	1
98000944	3.12788	2.69345	3.5623	1.32258	0.403353	0.858612	1
98000945	730.697	866.236	595.159	0.687064	-0.541484	0.161232	1
98000946	7.67667	0.285223	15.0681	52.8291	5.72326	0.110974	1
98000948	0.463522	0.626422	0.300621	0.479901	-1.05919	0.970617	1
98000949	1641.28	1797.29	1485.26	0.826389	-0.275106	0.475817	1
98000950	1.01865	1.05258	0.984714	0.935522	-0.0961561	1	1
98000955	0.552835	0	1.10567	Inf	Inf	0.595557	1
98000956	13.219	14.4451	11.9928	0.830235	-0.268408	0.795978	1
98000957	0.32091	0.341199	0.300621	0.881073	-0.182667	1	1
98000958	0.6645	1.05258	0.276418	0.262609	-1.92901	0.683129	1
98000959	0.632109	0.711383	0.552835	0.777128	-0.363777	1	1
98000960	32.1737	33.2746	31.0728	0.933829	-0.0987695	0.974649	1
98000963	150.422	163.175	137.669	0.843693	-0.24521	0.561023	1
98000967	2371.54	2496.5	2246.57	0.899888	-0.152183	0.705718	1
98000968	0.822301	0	1.6446	Inf	Inf	0.431235	1
98000969	0.177846	0.355691	0	0	#NAME?	0.973673	1
98000971	1.36238	1.25284	1.47192	1.17486	0.232492	1	1
98000975	3.54999	3.35801	3.74197	1.11434	0.156192	0.963764	1
98000976	0.598858	0.85567	0.342046	0.399741	-1.32286	0.716607	1
98000978	56.1367	60.5681	51.7053	0.853673	-0.228244	0.670181	1
98000979	1.72012	0.85567	2.58457	3.02052	1.5948	0.35762	1
98000980	434.147	375.242	493.052	1.31396	0.393921	0.291002	1
98000981	93.3441	101.434	85.2542	0.840489	-0.250698	0.69403	1
98000982	0.487078	0.355691	0.618464	1.73877	0.798063	1	1
98000983	4.81529	4.59636	5.03422	1.09526	0.131278	0.921222	1
98000986	2.28189	0.911646	3.65214	4.00609	2.0022	0.182427	1
98000987	0.447017	0.341199	0.552835	1.62027	0.696236	1	1
98000989	1.631	1.93524	1.32676	0.685578	-0.544607	0.78243	1
98000990	1.39471	0.626422	2.16299	3.45293	1.78782	0.349093	1
98000991	2.139	3.05829	1.21971	0.398819	-1.32619	0.526697	1
98000992	0.609853	0	1.21971	Inf	Inf	0.256028	1
98000993	0	0	0	NA	NA	NA	NA
98000994	4.78419	5.83671	3.73167	0.639345	-0.645334	0.563574	1
98000995	1.19136	1.25284	1.12987	0.901847	-0.149046	1	1
98000997	141.156	124.482	157.831	1.2679	0.342446	0.419207	1
98000998	66.838	63.293	70.383	1.11202	0.153179	0.749542	1
98000999	0.690915	0.355691	1.02614	2.88491	1.52853	0.78869	1
98001000	0.313211	0.626422	0	0	#NAME?	0.619562	1
98001001	0.479831	0.341199	0.618464	1.81262	0.858076	1	1
98001002	6.17248	3.1611	9.18387	2.90528	1.53868	0.0657761	1
98001003	0.491933	0.341199	0.642667	1.88356	0.913459	1	1
98001004	16.1278	15.1072	17.1483	1.13511	0.182827	0.733591	1
98001007	461.915	454.239	469.591	1.0338	0.0479533	0.922885	1
98001008	17.4189	16.3871	18.4506	1.12593	0.171113	0.874905	1
98001009	4.30453	4.86709	3.74197	0.768831	-0.379262	0.724663	1
98001010	8.85252	12.0938	5.61126	0.463979	-1.10787	0.151446	1
98001011	1.1957	0.570447	1.82095	3.19214	1.67453	0.589654	1
98001012	1891.25	1740.91	2041.6	1.17273	0.229865	0.563025	1
98001013	1654.23	2095.42	1213.05	0.578907	-0.788597	0.0455562	1
98001014	46.2957	59.9326	32.6588	0.544926	-0.875867	0.0640885	1
98001016	0.79631	0.355691	1.23693	3.47753	1.79806	0.636206	1
98001018	72.5676	76.2762	68.859	0.902759	-0.147588	0.794083	1
98001021	0.288519	0	0.577039	Inf	Inf	0.63304	1
98001026	2.75883	1.63752	3.88015	2.36952	1.2446	0.388635	1
98001027	0.486654	0.69689	0.276418	0.396644	-1.33408	0.966137	1
98001028	5.95467	8.81004	3.0993	0.351792	-1.50721	0.0519838	1
98001029	1.29532	2.59065	0	0	#NAME?	0.0387627	1
98001030	0.480255	0	0.96051	Inf	Inf	0.474017	1
98001031	21.6253	20.3117	22.9389	1.12934	0.175483	0.921457	1
98001035	1.36542	1.55256	1.17828	0.758927	-0.397966	0.957578	1
98001037	52.5942	49.1724	56.0161	1.13918	0.187993	0.67298	1
98001038	0.918237	0.682398	1.15408	1.69121	0.758055	0.795645	1
98001040	0.589629	0.626422	0.552835	0.882528	-0.180286	1	1
98001041	13.7635	15.0604	12.4665	0.827766	-0.272705	0.69558	1
98001042	1.14236	1.0236	1.26113	1.23206	0.301071	1	1
98001043	1.09745	1.0236	1.1713	1.1443	0.194462	1	1
98001044	396.434	439.381	353.487	0.804512	-0.313814	0.453777	1
98001045	1.08353	1.33781	0.829253	0.619861	-0.689984	0.956701	1
98001046	0.939374	0.341199	1.53755	4.50631	2.17195	0.435501	1
98001047	1.4071	0.682398	2.13181	3.124	1.64339	0.445164	1
98001048	186.203	222.471	149.935	0.673955	-0.569277	0.133475	1
98001049	186.852	258.715	114.989	0.444462	-1.16987	0.0090869	0.588346
98001052	6.80343	6.94526	6.66161	0.959158	-0.0601598	1	1
98001053	1826.17	1698.21	1954.12	1.1507	0.202506	0.637712	1
98001054	6.59518	6.50461	6.68575	1.02785	0.0396259	0.964154	1
98001055	200.287	147.361	253.212	1.71832	0.780995	0.0488933	1
98001056	0.993325	0	1.98665	Inf	Inf	0.113596	1
98001058	1.40839	2.26394	0.552835	0.244191	-2.03392	0.316371	1
98001059	0.756444	0.911646	0.601242	0.659513	-0.600528	0.961603	1
98001060	46.6366	38.3801	54.8932	1.43025	0.516271	0.415573	1
98001061	3.89897	3.1611	4.63685	1.46685	0.55272	0.728897	1
98001063	21.7198	15.764	27.6757	1.75562	0.811984	0.401923	1
98001064	0.604574	0.355691	0.853456	2.39943	1.26269	0.800808	1
98001065	1.54505	1.55256	1.53755	0.990331	-0.0140174	1	1
98001069	126.629	135.99	117.267	0.862323	-0.213699	0.666914	1
98001070	1.23384	1.33781	1.12987	0.844573	-0.243706	1	1
98001073	0.341623	0.341199	0.342046	1.00248	0.00357869	1	1
98001076	1.39807	1.0236	1.77254	1.73168	0.792172	0.710278	1
98001077	8502.14	8069.28	8934.99	1.10729	0.147027	0.700793	1
98001079	1633.46	1613.62	1653.3	1.02459	0.0350497	0.944315	1
98001080	5781.88	5307.47	6256.29	1.17877	0.237284	0.517746	1
98001082	250.432	262.278	238.586	0.909666	-0.136591	0.68192	1
98001084	1.88221	0.640915	3.1235	4.87351	2.28496	0.288421	1
98001086	3.59996	2.39039	4.80953	2.01203	1.00865	0.599143	1
98001087	1.45702	1.3523	1.56175	1.15489	0.207753	1	1
98001088	742.757	620.547	864.967	1.39388	0.479104	0.215684	1
98001089	1.24724	0.355691	2.13879	6.01305	2.5881	0.29541	1
98001090	1.22372	1.55256	0.894881	0.576391	-0.794881	0.768797	1
98001091	1.05309	0.285223	1.82095	6.38429	2.67453	0.298855	1
98001092	0.622867	0.285223	0.96051	3.36757	1.75171	0.808453	1
98001093	33.8554	41.102	26.6087	0.647382	-0.627311	0.183759	1
98001094	0.526715	0.711383	0.342046	0.480819	-1.05643	0.9754	1
98001095	2.93396	3.31453	2.55339	0.770362	-0.376392	0.941643	1
98001096	0.447441	0	0.894881	Inf	Inf	0.495982	1
98001097	2.85802	2.91736	2.79868	0.959321	-0.059915	1	1
98001099	835.67	842.619	828.721	0.983505	-0.023995	0.928172	1
98001101	39.0989	41.6934	36.5044	0.875544	-0.191748	0.822707	1
98001102	119.189	106.441	131.937	1.23954	0.309801	0.483861	1
98001103	1.16938	0.711383	1.62738	2.28763	1.19385	0.616089	1
98001104	11.4736	7.72712	15.22	1.96969	0.977969	0.114896	1
98001105	1304.91	1247.86	1361.96	1.09144	0.126233	0.784862	1
98001106	0.633669	1.26734	0	0	#NAME?	0.216157	1
98001107	1230.17	1186.21	1274.13	1.07412	0.103156	0.765916	1
98001108	236.14	252.658	219.623	0.869252	-0.202154	0.611698	1
98001109	0.861091	1.03809	0.684093	0.658992	-0.601667	0.962345	1
98001110	100.297	125.285	75.31	0.60111	-0.734299	0.0770817	1
98001112	1216.93	1188.35	1245.5	1.04809	0.0677686	0.845699	1
98001113	0.691044	0	1.38209	Inf	Inf	0.507405	1
98001116	16.2248	11.9428	20.5067	1.71708	0.779959	0.365396	1
98001117	1.31399	1.40827	1.21971	0.8661	-0.207394	1	1
98001119	0.348869	0.355691	0.342046	0.961638	-0.0564345	1	1
98001120	1.02957	1.48209	0.577039	0.38934	-1.3609	0.605179	1
98001121	0.760652	0.626422	0.894881	1.42856	0.514561	1	1
98001122	0.625286	0.355691	0.894881	2.51589	1.33107	0.785485	1
98001124	2.40842	0.570447	4.2464	7.44398	2.89607	0.0880449	1
98001127	0	0	0	NA	NA	NA	NA
98001128	11.0524	6.61856	15.4863	2.33982	1.2264	0.0869267	1
98001129	75.1109	67.9391	82.2826	1.21112	0.276345	0.48102	1
98001130	46.5529	45.8799	47.2258	1.02933	0.0417114	1	1
98001131	8.69773	5.02252	12.3729	2.46349	1.30071	0.196229	1
98001132	0.450932	0	0.901863	Inf	Inf	0.454775	1
98001134	2.06628	0.967621	3.16493	3.27084	1.70966	0.282391	1
98001138	574.795	510.695	638.896	1.25103	0.32312	0.396354	1
98001139	27.53	15.0513	40.0088	2.65817	1.41043	0.114424	1
98001140	474.108	503.699	444.517	0.882505	-0.180324	0.630939	1
98001141	35.9555	36.6056	35.3053	0.964479	-0.0521784	0.992038	1
98001143	413.349	448.534	378.165	0.843113	-0.246202	0.461122	1
98001145	16.2916	13.9808	18.6024	1.33056	0.412037	0.681199	1
98001146	16.3361	15.9663	16.706	1.04633	0.0653375	1	1
98001148	11.3413	12.2786	10.404	0.847323	-0.239016	0.89921	1
98001149	1.27245	1.65002	0.894881	0.542346	-0.882714	0.81052	1
98001150	3.73887	3.90146	3.57627	0.916647	-0.125561	1	1
98001152	4.12596	5.83671	2.41521	0.413796	-1.27301	0.237889	1
98001153	1.13197	2.26394	0	0	#NAME?	0.0497281	1
98001154	5.5528	2.97533	8.13027	2.73256	1.45025	0.088549	1
98001155	2.32091	3.44632	1.1955	0.346892	-1.52744	0.33288	1
98001156	5.96301	3.10177	8.82426	2.84491	1.50838	0.392647	1
98001157	167.496	175.225	159.766	0.911775	-0.133251	0.879662	1
98001158	9.81112	9.23955	10.3827	1.12372	0.168286	0.961861	1
98001160	10.1195	0.996606	19.2424	19.3079	4.27112	0.0290561	0.981807
98001161	0.581442	0.285223	0.87766	3.07709	1.62157	0.782033	1
98001162	2.28943	3.7012	0.87766	0.237128	-2.07626	0.154412	1
98001163	143.038	131.707	154.368	1.17205	0.229039	0.557135	1
98001164	0.423432	0.570447	0.276418	0.484563	-1.04524	0.967763	1
98001167	6308.01	6229.94	6386.08	1.02506	0.0357113	0.947538	1
98001169	202.099	174.022	230.176	1.32268	0.403465	0.310948	1
98001170	2.69228	3.75718	1.62738	0.433139	-1.2071	0.448857	1
98001171	0.925907	0.355691	1.49612	4.20624	2.07253	0.525905	1
98001174	3.57711	2.33776	4.81645	2.06028	1.04284	0.557633	1
98001175	2.22778	1.56705	2.88851	1.84328	0.882272	0.653201	1
98001176	8.06682	9.0123	7.12135	0.790181	-0.339744	0.692005	1
98001178	0.690915	0.355691	1.02614	2.88491	1.52853	0.825875	1
98001180	1.40642	1.89376	0.919085	0.485323	-1.04298	0.607139	1
98001181	5527.59	5894.52	5160.67	0.875503	-0.191816	0.659504	1
98001184	1661.41	1631.19	1691.64	1.03706	0.0524936	0.879092	1
98001186	11.2158	10.3211	12.1105	1.17337	0.230658	0.744551	1
98001190	2.48789	1.85228	3.1235	1.68631	0.753866	0.69412	1
98001192	1654.7	1441.4	1867.99	1.29595	0.374014	0.339307	1
98001193	121.39	124.013	118.767	0.957697	-0.0623585	0.904266	1
98001194	2.2374	0.570447	3.90435	6.84437	2.77492	0.0779152	1
98001196	0.614256	0.285223	0.943288	3.30719	1.72561	0.773324	1
98001197	0.138209	0	0.276418	Inf	Inf	1	1
98001200	0	0	0	NA	NA	NA	NA
98001201	50.4411	64.941	35.9411	0.553443	-0.853494	0.0783789	1
98001206	0.98299	1.32331	0.642667	0.48565	-1.04201	0.726641	1
98001208	2683.6	3028.11	2339.08	0.772457	-0.372473	0.292259	1
98001210	55.1758	66.5777	43.7739	0.657486	-0.604967	0.183034	1
98001211	0.138209	0	0.276418	Inf	Inf	1	1
98001212	0.918209	0.640915	1.1955	1.86531	0.899412	0.828305	1
98001213	1.97792	0.711383	3.24446	4.56078	2.18928	0.245447	1
98001214	20.965	16.458	25.472	1.5477	0.630123	0.315217	1
98001216	2.91629	2.04919	3.78339	1.84629	0.884629	0.485717	1
98001217	2.79089	1.03809	4.5437	4.37698	2.12994	0.16183	1
98001218	0.487078	0.355691	0.618464	1.73877	0.798063	1	1
98001219	1.53625	0.982114	2.09038	2.12845	1.08981	0.624075	1
98001220	1053.95	958.839	1149.07	1.1984	0.261105	0.511328	1
98001221	496.977	465.142	528.813	1.13689	0.185087	0.654302	1
98001222	46.9422	59.9645	33.92	0.565669	-0.82197	0.176159	1
98001223	5.58371	2.24945	8.91797	3.96451	1.98714	0.3187	1
98001225	61.9573	85.354	38.5607	0.451774	-1.14633	0.33548	1
98001226	0.756249	0.341199	1.1713	3.43289	1.77942	0.575105	1
98001227	0.414626	0	0.829253	Inf	Inf	0.457643	1
98001228	10.8687	2.04919	19.6882	9.60781	3.26421	0.00599732	0.473941
98001230	576.141	543.083	609.199	1.12174	0.165742	0.68181	1
98001231	55417.8	61582.5	49253.1	0.79979	-0.322307	0.380786	1
98001232	2.5481	1.72049	3.37572	1.96207	0.972378	0.405104	1
98001233	4.23774	3.92846	4.54702	1.15746	0.210959	0.886884	1
98001234	2.9985	3.49894	2.49806	0.713947	-0.486112	0.812403	1
98001235	1.41256	1.05258	1.77254	1.68399	0.751887	0.751221	1
98001237	10.5825	11.0793	10.0857	0.91032	-0.135555	0.83072	1
98001238	0.984469	1.06707	0.901863	0.845174	-0.24268	1	1
98001239	0.58565	0	1.1713	Inf	Inf	0.355574	1
98001242	375.52	325.664	425.376	1.30618	0.385353	0.343866	1
98001243	49.6031	62.0696	37.1366	0.598305	-0.741047	0.10109	1
98001244	46.8319	61.9035	31.7602	0.51306	-0.9628	0.0397119	1
98001247	694.585	709.185	679.985	0.958826	-0.0606592	0.886273	1
98001249	14.5657	10.8467	18.2846	1.68572	0.753369	0.482803	1
98001250	0.451844	0.285223	0.618464	2.16835	1.1166	1	1
98001252	0.426728	0	0.853456	Inf	Inf	0.422386	1
98001253	869.221	795.654	942.789	1.18492	0.244794	0.541996	1
98001254	0.458666	0.640915	0.276418	0.431286	-1.21328	0.964951	1
98001256	0.486654	0.69689	0.276418	0.396644	-1.33408	0.967429	1
98001258	0.328156	0.355691	0.300621	0.845174	-0.24268	1	1
98001260	1.44674	1.03809	1.85539	1.78731	0.837793	0.714882	1
98001263	265.207	253.807	276.607	1.08983	0.124106	0.7563	1
98001264	3.91023	3.84349	3.97696	1.03473	0.0492477	1	1
98001265	7.00502	4.42508	9.58496	2.16605	1.11507	0.150869	1
98001269	419.884	444.148	395.619	0.890736	-0.16693	0.682116	1
98001270	0.79631	0.355691	1.23693	3.47753	1.79806	0.5956	1
98001271	3.11729	2.4787	3.75587	1.51526	0.599564	0.637435	1
98001273	84.5667	59.9585	109.175	1.82084	0.864606	0.0384444	1
98001274	1.10773	1.33781	0.87766	0.656044	-0.608135	0.951767	1
98001276	159.898	132.188	187.608	1.41925	0.505134	0.690671	1
98001277	6.82643	6.95641	6.69645	0.962631	-0.0549449	0.958133	1
98001278	0.683669	0.341199	1.02614	3.00745	1.58854	0.810026	1
98001279	0.617616	0.682398	0.552835	0.810136	-0.303764	1	1
98001280	1.82962	0.967621	2.69163	2.78169	1.47596	0.358164	1
98001283	5178.57	5477.89	4879.24	0.890714	-0.166965	0.599898	1
98001284	891.366	816.641	966.092	1.18301	0.242457	0.509555	1
98001286	1074.54	1254.43	894.652	0.713193	-0.487635	0.26488	1
98001287	2.13302	2.0202	2.24584	1.11169	0.152758	1	1
98001288	0.868337	1.05258	0.684093	0.649919	-0.621669	0.961353	1
98001289	1.44716	0.69689	2.19744	3.1532	1.65682	0.518463	1
98001290	50.8751	54.2615	47.4887	0.875181	-0.192346	0.754635	1
98001292	30.4573	36.3204	24.5941	0.677145	-0.562464	0.294688	1
98001293	0.458666	0.640915	0.276418	0.431286	-1.21328	0.96861	1
98001295	1.57059	1.49659	1.6446	1.0989	0.136065	1	1
98001296	1.20871	0.85567	1.56175	1.82518	0.868039	0.861501	1
98001297	57.8594	80.1473	35.5716	0.443827	-1.17193	0.0640938	1
98001298	0.309232	0	0.618464	Inf	Inf	0.619338	1
98001299	1.04588	1.19687	0.894881	0.747685	-0.419497	0.951702	1
98001300	0.471644	0	0.943288	Inf	Inf	0.426995	1
98001301	4.92616	4.81112	5.04121	1.04782	0.0673973	1	1
98001302	3.16324	2.24945	4.07703	1.81246	0.857947	0.552686	1
98001303	23.6282	27.3511	19.9052	0.727767	-0.458452	0.566225	1
98001304	0.341199	0.682398	0	0	#NAME?	0.57739	1
98001306	122.694	98.828	146.559	1.48297	0.568494	0.183935	1
98001307	3.60873	4.48441	2.73305	0.609456	-0.714405	0.516733	1
98001308	3.42993	1.19687	5.66299	4.7315	2.2423	0.0486462	1
98001309	1.83808	1.28183	2.39432	1.8679	0.901414	0.819452	1
98001313	0.280821	0.285223	0.276418	0.969126	-0.0452432	1	1
98001314	814.985	1003.23	626.736	0.624715	-0.67873	0.0990065	1
98001315	1.79536	2.46085	1.12987	0.459139	-1.123	0.74839	1
98001316	0.602154	0.285223	0.919085	3.22233	1.68811	0.780823	1
98001317	828.117	911.508	744.726	0.817026	-0.291545	0.469026	1
98001318	0.491509	0.682398	0.300621	0.440536	-1.18267	0.962175	1
98001319	2.46372	1.89376	3.03367	1.60193	0.679812	0.669281	1
98001321	4.34997	4.12872	4.57122	1.10718	0.146886	0.992199	1
98001322	1.94766	2.67561	1.21971	0.455861	-1.13333	0.506642	1
98001323	1.12518	1.94973	0.300621	0.154186	-2.69726	0.390958	1
98001325	1.54179	2.16449	0.919085	0.42462	-1.23576	0.500478	1
98001326	0	0	0	NA	NA	NA	NA
98001327	0.971312	0.982114	0.96051	0.978003	-0.0320892	1	1
98001329	6.47869	3.17559	9.78179	3.08031	1.62307	0.0518268	1
98001330	0.459542	0	0.919085	Inf	Inf	0.446181	1
98001332	1.64954	1.26734	2.03174	1.60315	0.680913	0.722963	1
98001333	1.02572	0.341199	1.71023	5.01242	2.32551	0.427338	1
98001334	0.840349	0.996606	0.684093	0.686422	-0.542832	0.965565	1
98001335	1.33352	1.83778	0.829253	0.451224	-1.14808	0.623545	1
98001336	47.8197	50.3864	45.253	0.898119	-0.155022	0.671743	1
98001337	7.92312	6.0751	9.77115	1.60839	0.685619	0.410242	1
98001338	3.75566	3.35801	4.15331	1.23684	0.306654	0.764803	1
98001339	249.24	200.197	298.283	1.48995	0.575261	0.140244	1
98001340	4.7794	4.36911	5.18969	1.18781	0.248309	0.814451	1
98001341	1.40727	1.21136	1.60318	1.32345	0.404304	1	1
98001342	42.5761	47.6045	37.5477	0.788742	-0.342374	0.698223	1
98001343	5.26442	2.46421	8.06464	3.27271	1.71049	0.0758038	1
98001344	0.662504	0.640915	0.684093	1.06737	0.0940589	1	1
98001345	120.01	135.709	104.31	0.768626	-0.379647	0.504953	1
98001346	4.70203	2.59065	6.8134	2.63	1.39506	0.375885	1
98001347	0.621531	0.341199	0.901863	2.64322	1.4023	0.821039	1
98001348	1.91706	1.97872	1.85539	0.937673	-0.0928437	1	1
98001350	869.132	754.183	984.082	1.30483	0.383863	0.335045	1
98001355	4.99933	2.59065	7.40801	2.85952	1.51577	0.0785633	1
98001357	993.793	1063.34	924.243	0.869185	-0.202265	0.617768	1
98001358	1.47362	2.64663	0.300621	0.113587	-3.13814	0.0823168	1
98001359	3.90698	3.08728	4.72668	1.53102	0.614493	0.585474	1
98001362	2.03686	0	4.07371	Inf	Inf	0.114396	1
98001363	0.533537	1.06707	0	0	#NAME?	0.425196	1
98001365	0.566044	0.85567	0.276418	0.323042	-1.63021	0.700746	1
98001366	0.742783	0.355691	1.12987	3.17656	1.66746	0.6627	1
98001368	2.04426	1.94973	2.13879	1.09696	0.133517	1	1
98001370	1237.32	1226.65	1247.99	1.0174	0.0248808	0.945167	1
98001371	3.52529	3.41933	3.63125	1.06198	0.0867534	1	1
98001372	3.49796	3.831	3.16493	0.826137	-0.275546	0.82007	1
98001373	3.2785	2.90486	3.65214	1.25725	0.330273	0.8582	1
98001374	3.96208	3.84014	4.08401	1.06351	0.088828	0.975623	1
98001378	2.20997	1.37929	3.04065	2.20451	1.14046	0.452411	1
98001381	6.09712	4.75179	7.44245	1.56624	0.647307	0.4066	1
98001382	189.726	206.03	173.421	0.841729	-0.248572	0.551521	1
98001383	1.05312	1.21136	0.894881	0.73874	-0.436861	0.955369	1
98001384	0.455823	0.911646	0	0	#NAME?	0.385604	1
98001385	7.0953	2.40488	11.7857	4.90075	2.293	0.00590726	0.468805
98001386	0.142612	0.285223	0	0	#NAME?	0.972577	1
98001387	15.2787	11.2907	19.2667	1.70642	0.770969	0.238051	1
98001388	4.44768	3.04579	5.84957	1.92054	0.941513	0.349002	1
98001389	1848.8	2106.45	1591.14	0.755363	-0.404758	0.277051	1
98001390	12.7755	8.7652	16.7858	1.91505	0.93738	0.231926	1
98001391	381.329	381.053	381.605	1.00145	0.00209059	0.974465	1
98001392	0.596875	0.640915	0.552835	0.862572	-0.213283	1	1
98001393	251.798	238.165	265.431	1.11448	0.156372	0.704947	1
98001394	10.8491	10.7763	10.922	1.01352	0.0193757	1	1
98001398	87.7791	66.7452	108.813	1.63028	0.705117	0.116066	1
98001401	1.82758	2.07618	1.57897	0.760519	-0.394943	0.956091	1
98001403	513.637	466.427	560.848	1.20244	0.26596	0.497778	1
98001404	1.14276	0.640915	1.6446	2.56602	1.35953	0.707815	1
98001405	96.0936	106.397	85.7905	0.806325	-0.310566	0.53826	1
98001406	0.707549	0.285223	1.12987	3.96136	1.986	0.659859	1
98001409	1.52917	1.49659	1.56175	1.04354	0.0614911	1	1
98001412	339.634	345.664	333.604	0.965112	-0.0512311	0.871512	1
98001413	1.33823	2.33441	0.342046	0.146524	-2.7708	0.300634	1
98001414	1.24776	1.0236	1.47192	1.43799	0.524052	0.880068	1
98001415	450.598	468.88	432.317	0.922021	-0.117129	0.795212	1
98001416	235.938	231.682	240.194	1.03674	0.0520481	0.940863	1
98001417	0.81369	0	1.62738	Inf	Inf	0.229653	1
98001418	364.847	337.347	392.348	1.16304	0.217899	0.583573	1
98001419	589.253	534.568	643.937	1.20459	0.268546	0.482082	1
98001420	5.62136	6.04612	5.19661	0.859495	-0.218439	0.986736	1
98001421	0.671746	1.06707	0.276418	0.259043	-1.94874	0.756045	1
98001422	348.434	225.944	470.924	2.08425	1.05953	0.00778923	0.542131
98001424	904.123	964.052	844.193	0.875671	-0.191539	0.631029	1
98001426	32.7322	34.7303	30.7341	0.884936	-0.176355	0.798033	1
98001427	1948.24	2171.63	1724.85	0.794267	-0.332304	0.399369	1
98001429	7.29129	7.216	7.36658	1.02087	0.029797	0.9724	1
98001432	0.922612	0.926138	0.919085	0.992384	-0.0110295	1	1
98001434	1.27478	0.711383	1.83817	2.58394	1.36957	0.561533	1
98001435	479.627	532.098	427.157	0.80278	-0.316924	0.478912	1
98001439	39.3385	30.4185	48.2585	1.58648	0.665831	0.352952	1
98001440	0.655257	0.626422	0.684093	1.09206	0.127056	1	1
98001442	0.557238	0.285223	0.829253	2.90738	1.53972	0.739324	1
98001444	2.88526	1.6935	4.07703	2.40746	1.26751	0.334961	1
98001445	5.17609	7.82992	2.52226	0.322131	-1.63428	0.0992174	1
98001447	0.138209	0	0.276418	Inf	Inf	1	1
98001448	588.112	559.65	616.574	1.10171	0.13975	0.691368	1
98001450	2.06408	2.74608	1.38209	0.503295	-0.990523	0.68159	1
98001451	0.942477	1.60854	0.276418	0.171844	-2.54083	0.372175	1
98001453	242.135	210.886	273.383	1.29635	0.374461	0.353485	1
98001454	1033.65	988.284	1079.01	1.0918	0.126711	0.722189	1
98001455	1.9499	2.0202	1.8796	0.930399	-0.104078	1	1
98001456	8.55997	7.44189	9.67806	1.30048	0.379048	0.588387	1
98001457	0.426728	0	0.853456	Inf	Inf	0.409402	1
98001459	2.30043	2.53467	2.06618	0.815166	-0.294834	0.928958	1
98001460	97.6603	134.73	60.5911	0.449724	-1.15289	0.0073632	0.528185
98001461	0.787699	0.355691	1.21971	3.42911	1.77784	0.562177	1
98001464	251.39	262.062	240.718	0.918554	-0.122563	0.781334	1
98001467	120.085	147.488	92.6828	0.62841	-0.670223	0.106382	1
98001470	0.747186	0.640915	0.853456	1.33162	0.413184	1	1
98001471	1.08639	0.911646	1.26113	1.38336	0.468173	1	1
98001473	386.326	426.111	346.541	0.813265	-0.298203	0.485489	1
98001474	0.913382	0.69689	1.12987	1.62131	0.697158	0.82005	1
98001476	6653.97	6041.4	7266.54	1.20279	0.266386	0.500422	1
98001477	1.4079	1.63752	1.17828	0.719551	-0.47483	0.956547	1
98001478	0.806623	0.711383	0.901863	1.26776	0.342282	1	1
98001479	521.196	506.538	535.854	1.05787	0.0811672	0.856282	1
98001480	1.82424	1.72049	1.928	1.12061	0.16429	1	1
98001481	42.931	23.5886	62.2734	2.63998	1.40053	0.0418785	1
98001487	1.30632	1.73498	0.87766	0.505862	-0.983185	0.763834	1
98001490	66.8285	63.5293	70.1277	1.10387	0.142564	0.690539	1
98001491	0.288519	0	0.577039	Inf	Inf	0.641266	1
98001492	0	0	0	NA	NA	NA	NA
98001493	586.62	480.856	692.385	1.4399	0.52597	0.178437	1
98001494	1.33186	1.679	0.984714	0.586487	-0.76983	0.754773	1
98001498	3413.11	3478.83	3347.39	0.962217	-0.0555661	0.824954	1
98001499	175.809	163.709	187.91	1.14783	0.198905	0.725382	1
98001500	6.69087	3.0438	10.3379	3.39639	1.764	0.0282878	0.967072
98001501	330.784	418.882	242.687	0.579368	-0.787449	0.0412588	1
98001502	1.08744	0.996606	1.17828	1.18229	0.241588	1	1
98001503	0	0	0	NA	NA	NA	NA
98001504	71.2162	66.3551	76.0773	1.14652	0.197258	0.673823	1
98001505	104.744	116.909	92.579	0.791886	-0.336635	0.397295	1
98040999	4.01694	7.75746	0.276418	0.0356325	-4.81066	0.000271234	0.0578258
98001509	1.23625	1.21136	1.26113	1.04109	0.0580886	1	1
98001510	54.024	74.8643	33.1838	0.443253	-1.1738	0.0102252	0.619469
98001512	3.0372	0.926138	5.14826	5.55885	2.47479	0.0536099	1
98001514	1270.17	1429.5	1110.83	0.777079	-0.363866	0.364428	1
98001515	137.776	159.153	116.4	0.731371	-0.451325	0.416035	1
98001517	1644.49	1366.33	1922.65	1.40717	0.492792	0.215287	1
98001518	0.348869	0.355691	0.342046	0.961638	-0.0564345	1	1
98001519	0.751588	0.926138	0.577039	0.623059	-0.68256	0.958326	1
98001520	14.4262	14.7897	14.0627	0.950845	-0.0727178	0.966743	1
98001521	497.171	433.395	560.947	1.29431	0.37218	0.340973	1
98001522	219.167	195.83	242.505	1.23835	0.308416	0.428188	1
98001524	0.641791	0.640915	0.642667	1.00273	0.00393937	1	1
98001527	25.3218	20.6389	30.0046	1.45379	0.539821	0.362481	1
98001528	0.637388	0.355691	0.919085	2.58394	1.36957	0.794546	1
98001529	3996.73	4094.75	3898.71	0.952125	-0.0707772	0.877546	1
98001532	24.383	38.5799	10.1861	0.264027	-1.92124	0.090472	1
98001533	90.2071	99.8141	80.6001	0.807502	-0.308462	0.4742	1
98001534	18.1349	14.0941	22.1757	1.5734	0.653882	0.241468	1
98001536	1.93829	0.355691	3.52088	9.89869	3.30724	0.0534221	1
98001538	1.97489	2.8199	1.12987	0.400679	-1.31948	0.372586	1
98001539	321.02	351.519	290.521	0.826471	-0.274963	0.500356	1
98001540	17.3228	15.5314	19.1142	1.23068	0.299457	0.647686	1
98001541	11.4314	10.227	12.6359	1.23554	0.305139	0.758146	1
98001542	0.487078	0.355691	0.618464	1.73877	0.798063	1	1
98001544	0.684093	0	1.36819	Inf	Inf	0.558532	1
98001545	0.348445	0.69689	0	0	#NAME?	0.600192	1
98001547	19.0119	16.1525	21.8713	1.35405	0.437286	0.388891	1
98001548	206.135	188.933	223.336	1.18209	0.24134	0.560655	1
98001549	3.65332	4.42843	2.87821	0.649939	-0.621624	0.620754	1
98001550	1118.62	1283.78	953.47	0.742706	-0.429137	0.28468	1
98001551	222.667	164.575	280.758	1.70595	0.770579	0.0565844	1
98001553	0.171023	0	0.342046	Inf	Inf	1	1
98001556	4570.36	4742.49	4398.23	0.927409	-0.108722	0.722123	1
98001557	904.196	856.643	951.749	1.11102	0.151887	0.667451	1
98001559	3.4121	1.6935	5.13069	3.02965	1.59915	0.550874	1
98001560	0.626846	0.911646	0.342046	0.375196	-1.41428	0.686113	1
98001561	40.5616	55.7619	25.3613	0.454813	-1.13665	0.0116822	0.657188
98001563	8.3693	8.86067	7.87793	0.88909	-0.169599	1	1
98001566	1.1777	0.69689	1.65851	2.37987	1.25088	0.628891	1
98001567	2.36756	2.31992	2.41521	1.04107	0.0580733	1	1
98001568	2.78045	3.44632	2.11459	0.613578	-0.704681	0.538877	1
98001570	10.3082	17.5516	3.06486	0.17462	-2.51771	0.000967196	0.153913
98001572	1.36542	1.55256	1.17828	0.758927	-0.397966	0.941039	1
98001573	51.4933	52.067	50.9196	0.977964	-0.0321462	1	1
98001574	7288.78	8450.67	6126.9	0.725019	-0.463909	0.240771	1
98001575	0.479831	0.341199	0.618464	1.81262	0.858076	1	1
98001576	505.464	539.176	471.752	0.874951	-0.192726	0.641592	1
98001577	369.913	431.472	308.354	0.714655	-0.484681	0.29201	1
98001579	29.2219	34.3127	24.1312	0.703274	-0.507841	0.340664	1
98001581	1.51877	1.73498	1.30256	0.750762	-0.413573	0.956344	1
98001584	2.64694	1.33781	3.95608	2.95714	1.5642	0.438834	1
98023259	130.475	247.389	13.5618	0.0548198	-4.18916	4.5854e-14	4.26139e-10
98001587	16.5424	11.9152	21.1697	1.77671	0.829205	0.172257	1
98001588	3921.05	3548.23	4293.87	1.21014	0.275178	0.492896	1
98001590	237.868	243.371	232.364	0.954769	-0.0667763	0.933848	1
98001592	15.277	8.37138	22.1825	2.64981	1.40589	0.063359	1
98001594	2.39226	2.94634	1.83817	0.623882	-0.680654	0.672774	1
98001595	66.137	81.1983	51.0756	0.629022	-0.668817	0.0998086	1
98001596	0.309232	0	0.618464	Inf	Inf	0.621263	1
98001597	216.722	267.104	166.341	0.622756	-0.683261	0.0834163	1
98001598	4.02233	4.75179	3.29287	0.692974	-0.529126	0.821425	1
98001601	0.894881	0	1.78976	Inf	Inf	0.173002	1
98001602	0.609853	0	1.21971	Inf	Inf	0.271874	1
98001603	13.6347	13.6936	13.5758	0.991398	-0.0124634	0.99526	1
98001604	452.804	469.699	435.909	0.928062	-0.107707	0.772819	1
98001606	2.28436	2.06368	2.50504	1.21387	0.279614	0.930881	1
98001607	4061.66	2956.19	5167.13	1.7479	0.805624	0.0409844	1
98001608	67.7437	59.5006	75.9867	1.27707	0.352843	0.440562	1
98001609	0.771389	0.640915	0.901863	1.40715	0.492776	1	1
98001611	0.94662	0.355691	1.53755	4.3227	2.11193	0.472445	1
98001613	87.3242	74.9451	99.7033	1.33035	0.411808	0.351966	1
98001614	0.309232	0	0.618464	Inf	Inf	0.656017	1
98001617	1722.53	1464	1981.06	1.35318	0.436355	0.250367	1
98001618	0.177846	0.355691	0	0	#NAME?	0.97579	1
98001619	1.77698	1.21136	2.3426	1.93386	0.95148	0.62975	1
98001620	314.959	287.716	342.203	1.18938	0.250209	0.526883	1
98001622	289.822	412.157	167.488	0.406369	-1.29914	0.00121553	0.175957
98001624	163.994	171.188	156.801	0.915959	-0.126645	0.761247	1
98001625	2.58852	2.87587	2.30117	0.800165	-0.321631	0.927313	1
98001627	1.32985	1.42277	1.23693	0.869383	-0.201937	1	1
98001628	4.07947	2.67561	5.48332	2.04937	1.03518	0.339629	1
98001629	5.29868	3.61425	6.98311	1.93211	0.950175	0.260631	1
98001630	3.6721	2.53467	4.80953	1.8975	0.924096	0.54441	1
98001631	1.06897	0.341199	1.79674	5.26597	2.3967	0.406098	1
98001632	23.9079	29.8726	17.9432	0.600658	-0.735384	0.147659	1
98001635	0.664923	0.711383	0.618464	0.869383	-0.201937	1	1
98001636	3.65997	1.60854	5.7114	3.55068	1.82809	0.150385	1
98001637	18.8114	25.2946	12.3283	0.487387	-1.03686	0.0624714	1
98001638	26.0632	10.3737	41.7527	4.02484	2.00893	0.0167913	0.773316
98001639	0.431131	0.285223	0.577039	2.02311	1.01658	1	1
98001640	0.644211	0.711383	0.577039	0.811151	-0.301958	1	1
98001641	0.640915	1.28183	0	0	#NAME?	0.213326	1
98001645	550.281	613.233	487.329	0.794687	-0.331541	0.423243	1
98001652	483.74	539.339	428.141	0.793826	-0.333106	0.416934	1
98001653	1586.69	1679.84	1493.54	0.889096	-0.169589	0.682008	1
98001654	30.1464	32.4401	27.8526	0.858586	-0.219965	0.683044	1
98001655	76.2216	87.6022	64.8409	0.740175	-0.434062	0.51533	1
98001656	4.65133	4.19583	5.10683	1.21712	0.283472	0.722249	1
98001657	2.73641	2.80541	2.66742	0.950815	-0.0727628	1	1
98001658	0.949723	1.62303	0.276418	0.17031	-2.55377	0.35611	1
98001659	1.13069	0.682398	1.57897	2.31386	1.2103	0.640139	1
98001662	623.612	663.847	583.377	0.878782	-0.186423	0.614115	1
98001663	4.57356	3.07278	6.07433	1.97681	0.983178	0.236588	1
98001664	1645.73	1773.19	1518.27	0.85624	-0.223912	0.564739	1
98001665	2908.47	3109.96	2706.98	0.870422	-0.200213	0.594129	1
98001666	4.56039	3.98643	5.13436	1.28796	0.365088	0.868352	1
98001667	1.08881	0.982114	1.1955	1.21727	0.283655	1	1
98001668	3.83818	3.30203	4.37433	1.32474	0.405709	0.654965	1
98001669	0.626846	0.911646	0.342046	0.375196	-1.41428	0.644336	1
98001670	0.894458	0.341199	1.44772	4.24303	2.08509	0.596183	1
98001671	4.59382	5.66343	3.5242	0.622272	-0.684382	0.465275	1
98001672	2.91371	1.56705	4.26036	2.71871	1.44292	0.356382	1
98001673	597.979	680.869	515.09	0.756519	-0.402552	0.4463	1
98001674	17.0442	16.8054	17.283	1.02842	0.040426	0.976346	1
98001676	0.79631	0.355691	1.23693	3.47753	1.79806	0.607715	1
98001678	779.436	706.694	852.178	1.20587	0.27007	0.479015	1
98001680	6.93446	5.44868	8.42024	1.54537	0.627955	0.426854	1
98001681	1.37687	1.28183	1.47192	1.1483	0.199495	1	1
98001683	635.611	659.519	611.702	0.927497	-0.108585	0.813973	1
98001684	0.77628	1.55256	0	0	#NAME?	0.220845	1
98001685	1.80178	3.00232	0.601242	0.200259	-2.32006	0.260957	1
98001686	666.372	656.727	676.016	1.02937	0.0417645	0.899994	1
98001688	1.07758	0.341199	1.81397	5.31645	2.41046	0.312427	1
98001689	435.912	357.41	514.414	1.43928	0.525347	0.246175	1
98001690	1.39276	1.33781	1.44772	1.08216	0.113911	1	1
98001691	3.70139	4.36911	3.03367	0.694346	-0.526273	0.719817	1
98001693	5.75553	5.29525	6.21582	1.17385	0.231248	0.848807	1
98001696	1.24594	1.33781	1.15408	0.862665	-0.213128	1	1
98001698	0.966909	0.69689	1.23693	1.77492	0.827758	0.840413	1
98001699	1.48409	0.967621	2.00055	2.06749	1.04788	0.767562	1
98001700	15.1711	13.0112	17.331	1.33201	0.4136	0.60864	1
98001702	0.618464	0	1.23693	Inf	Inf	0.332298	1
98001704	4.51777	3.57276	5.46278	1.52901	0.612596	0.546042	1
98001705	0.662504	0.640915	0.684093	1.06737	0.0940589	1	1
98001707	165.539	177.567	153.512	0.864529	-0.210014	0.604376	1
98001708	3.38884	3.89947	2.87821	0.738103	-0.438105	0.80817	1
98001710	2011.44	2412.92	1609.96	0.667226	-0.583752	0.1377	1
98001711	3.26826	3.67222	2.86431	0.779994	-0.358464	0.809167	1
98001712	411.732	365.444	458.02	1.25332	0.325758	0.407395	1
98001713	0.815234	0.711383	0.919085	1.29197	0.369572	1	1
98001715	84.4059	78.9034	89.9083	1.13947	0.188367	0.719874	1
98001717	1085.08	1137.44	1032.71	0.907923	-0.139358	0.73701	1
98001720	0.669326	0.996606	0.342046	0.343211	-1.54283	0.738434	1
98001722	1.70176	2.24945	1.15408	0.513048	-0.962833	0.58577	1
98001725	0.825857	0.967621	0.684093	0.706984	-0.500251	0.955611	1
98001726	45.5716	70.8298	20.3134	0.286791	-1.80193	0.00230044	0.260084
98001727	4.56089	0	9.12178	Inf	Inf	0.396256	1
98001729	1.2739	1.3523	1.1955	0.884053	-0.177796	1	1
98001731	4.40552	2.97868	5.83235	1.95803	0.969406	0.403644	1
98001734	1.19091	1.55256	0.829253	0.534119	-0.904766	0.75417	1
98001735	531.02	542.933	519.106	0.956114	-0.0647456	0.901396	1
98001736	113.192	121.408	104.976	0.86466	-0.209795	0.62703	1
98001738	0.931675	0.626422	1.23693	1.97459	0.981554	0.833701	1
98001740	3925.72	3854.8	3996.64	1.03679	0.0521304	0.880347	1
98001741	482.859	491.713	474.004	0.963984	-0.0529188	0.834305	1
98001742	1.67756	2.24945	1.10567	0.491529	-1.02465	0.676239	1
98001743	136.703	158.219	115.187	0.728026	-0.457939	0.284043	1
98001744	174.635	167.571	181.699	1.08431	0.116777	0.744422	1
98001745	7.41005	3.78417	11.0359	2.91635	1.54416	0.0369878	1
98001746	0.341623	0.341199	0.342046	1.00248	0.00357869	1	1
98001749	0.917297	0.355691	1.4789	4.15782	2.05583	0.576311	1
98001751	175.164	172.886	177.442	1.02635	0.0375258	0.967334	1
98001752	0.498303	0.996606	0	0	#NAME?	0.427649	1
98001753	5.64205	6.12193	5.16216	0.843225	-0.246011	0.912539	1
98001754	115.305	91.0831	139.526	1.53186	0.61528	0.134205	1
98001755	1.55563	1.03809	2.07316	1.99709	0.997903	0.548243	1
98001758	0.626846	0.911646	0.342046	0.375196	-1.41428	0.748254	1
98001759	10.6547	12.2432	9.06617	0.740505	-0.433418	0.684142	1
98001760	9.07875	6.90378	11.2537	1.63008	0.704942	0.287105	1
98001764	3.58779	2.98782	4.18775	1.40161	0.48708	0.643984	1
98001765	11.4272	9.22705	13.6274	1.4769	0.562572	0.503547	1
98001766	0.342046	0	0.684093	Inf	Inf	0.607623	1
98001767	42.621	32.7984	52.4437	1.59897	0.677142	0.202202	1
98001768	0.657677	0.69689	0.618464	0.887462	-0.172242	1	1
98001769	0.727349	0	1.4547	Inf	Inf	0.190356	1
98001770	733.559	604.966	862.152	1.42512	0.511088	0.190155	1
98001771	2.66599	1.33781	3.99418	2.98562	1.57803	0.247489	1
98001773	764.814	713.45	816.179	1.14399	0.194073	0.664508	1
98001774	460.768	449.004	472.533	1.0524	0.0736862	0.856415	1
98001775	0.943324	0.926138	0.96051	1.03711	0.0525732	1	1
98001777	10.3519	10.3626	10.3413	0.997941	-0.00297343	0.995307	1
98001778	0.285223	0.570447	0	0	#NAME?	0.597142	1
98001780	151.145	157.986	144.304	0.913394	-0.130691	0.72347	1
98001781	158.165	159.635	156.694	0.981577	-0.0268271	0.977967	1
98001782	6971.2	6876.02	7066.38	1.02768	0.0393967	0.925826	1
98001784	117.068	115.113	119.022	1.03396	0.0481824	0.883344	1
98001786	3.44181	2.30543	4.5782	1.98584	0.989748	0.42116	1
98001787	956.865	1025.88	887.849	0.86545	-0.208478	0.549836	1
98001788	0.292922	0.285223	0.300621	1.05398	0.0758533	1	1
98001789	2.16353	1.74947	2.57759	1.47335	0.559103	0.689098	1
98001791	90.4046	81.0681	99.7411	1.23034	0.299053	0.478737	1
98001792	111.521	121.999	101.044	0.828234	-0.27189	0.538567	1
98001793	1.43949	1.0236	1.85539	1.81262	0.858076	0.760586	1
98001795	1639.44	1790.39	1488.5	0.831383	-0.266415	0.471817	1
98001797	0.840349	0.996606	0.684093	0.686422	-0.542832	0.96399	1
98001800	47.0894	70.4413	23.7375	0.336984	-1.56925	0.00127162	0.179734
98001801	12.2268	7.16002	17.2935	2.41529	1.2722	0.0414745	1
98001803	69.8827	81.0712	58.6941	0.723983	-0.465973	0.295406	1
98001806	0.463522	0.626422	0.300621	0.479901	-1.05919	0.967083	1
98001807	18.5384	16.3075	20.7694	1.27361	0.348927	0.58437	1
98001808	1.70614	2.49319	0.919085	0.368638	-1.43972	0.371463	1
98001810	964.015	1032.97	895.064	0.866497	-0.206733	0.608767	1
98001811	0	0	0	NA	NA	NA	NA
98001812	221.885	230.083	213.687	0.92874	-0.106653	0.861272	1
98001814	2253.17	2506.51	1999.82	0.797848	-0.325814	0.534825	1
98001816	55.4814	70.067	40.8958	0.583667	-0.776782	0.0752259	1
98001817	23.4639	31.1892	15.7385	0.504612	-0.986753	0.0570592	1
98001819	0.484658	0.285223	0.684093	2.39844	1.2621	1	1
98001821	1768.84	1651.34	1886.34	1.14231	0.191953	0.633703	1
98001823	0	0	0	NA	NA	NA	NA
98001824	1.2367	0.911646	1.56175	1.71311	0.77662	0.880688	1
98001825	11.7701	11.3467	12.1934	1.07462	0.103826	0.968625	1
98001828	5.43047	5.32224	5.53871	1.04067	0.0575184	1	1
98001830	1.28142	0.341199	2.22164	6.51128	2.70294	0.235918	1
98001831	183.642	220.541	146.744	0.66538	-0.58775	0.151334	1
98001832	4.62761	2.33441	6.9208	2.96469	1.56788	0.100228	1
98001840	230.666	267.211	194.122	0.726474	-0.461018	0.240639	1
98001842	1.89363	1.73498	2.05228	1.18288	0.242307	1	1
98001848	2.29641	0.982114	3.61071	3.67647	1.87832	0.214548	1
98001850	2.43123	1.94973	2.91272	1.4939	0.579087	0.786368	1
98001851	3.53349	5.48102	1.58596	0.289354	-1.78909	0.0795394	1
98001852	3.74323	3.831	3.65546	0.954179	-0.0676687	0.93834	1
98001853	247.19	184.992	309.388	1.67244	0.741955	0.0647377	1
98001855	0.61804	0.341199	0.894881	2.62276	1.39108	0.77304	1
98001858	0.506002	0.711383	0.300621	0.422587	-1.24268	0.968781	1
98001859	10.4472	10.1209	10.7735	1.06448	0.0901541	0.89371	1
98001863	2.78121	3.35801	2.20442	0.656466	-0.607207	0.690577	1
98001864	0.483811	0.967621	0	0	#NAME?	0.44903	1
98001865	0.622019	0.967621	0.276418	0.285667	-1.80759	0.727282	1
98001866	1.89938	2.27844	1.52033	0.667268	-0.583662	0.754973	1
98001868	1946.46	1403.13	2489.8	1.77447	0.827388	0.0411763	1
98001871	339.024	364.265	313.783	0.861413	-0.215224	0.593864	1
98001872	0	0	0	NA	NA	NA	NA
98001874	31.0808	24.4336	37.728	1.54411	0.626771	0.175033	1
98001878	52.7158	68.9864	36.4451	0.528295	-0.920584	0.0421274	1
98001881	0.634092	0.926138	0.342046	0.369325	-1.43704	0.727105	1
98001883	0.138209	0	0.276418	Inf	Inf	1	1
98001885	0.996033	1.65002	0.342046	0.207298	-2.27022	0.42994	1
98001886	0.625286	0.355691	0.894881	2.51589	1.33107	0.751771	1
98001888	504.039	476.322	531.756	1.11638	0.158829	0.732938	1
98001889	0.454263	0.355691	0.552835	1.55426	0.636223	1	1
98001890	2.3304	2.80541	1.85539	0.661363	-0.596485	0.646043	1
98001891	0	0	0	NA	NA	NA	NA
98001892	1.29859	1.97872	0.618464	0.312558	-1.67781	0.504659	1
98001893	1875.51	1257.95	2493.06	1.98184	0.986841	0.0098135	0.610963
98001894	1.06988	0.626422	1.51335	2.41585	1.27253	0.689991	1
98001895	29.262	29.1097	29.4144	1.01047	0.0150208	0.97464	1
98001897	0	0	0	NA	NA	NA	NA
98001899	2.08827	2.54917	1.62738	0.638397	-0.647474	0.676577	1
98001901	32.5656	20.8247	44.3065	2.1276	1.08923	0.0378618	1
98001902	1.15078	0.570447	1.73112	3.03467	1.60154	0.476106	1
98001903	257.331	274.323	240.34	0.876119	-0.190802	0.736702	1
98001904	1.214	0.69689	1.73112	2.48406	1.3127	0.602382	1
98001905	199.918	231.906	167.931	0.724132	-0.465675	0.239468	1
98001907	1.08153	0.926138	1.23693	1.33558	0.417462	1	1
98001908	377.329	460.676	293.981	0.63815	-0.648032	0.0955321	1
98001909	0.767927	0.682398	0.853456	1.25067	0.322704	1	1
98001911	0.787275	0.69689	0.87766	1.25939	0.33273	1	1
98001913	1021.88	1067.32	976.433	0.914842	-0.128406	0.712118	1
98001914	1.56003	1.32331	1.79674	1.35776	0.441231	0.888802	1
98001915	1034.92	1087.77	982.078	0.902835	-0.147466	0.653658	1
98001916	47.8052	45.4335	50.1768	1.1044	0.143266	0.745457	1
98001917	93.4794	86.0469	100.912	1.17275	0.229901	0.549636	1
98001918	13.3406	4.69916	21.982	4.67786	2.22585	0.0285118	0.970593
98001920	54.9923	36.8719	73.1127	1.98289	0.987601	0.027991	0.964486
98001923	0.355691	0.711383	0	0	#NAME?	0.613421	1
98001925	159.65	177.729	141.57	0.79655	-0.328164	0.461449	1
98001926	1657.07	1608.11	1706.02	1.06089	0.0852701	0.850956	1
98001927	3.23554	2.39039	4.0807	1.70713	0.771571	0.444728	1
98001928	7.98008	7.86805	8.0921	1.02848	0.0405078	0.916621	1
98001929	2.13936	1.74947	2.52924	1.44572	0.531787	0.762541	1
98001930	2.36583	1.03809	3.69356	3.55804	1.83108	0.202604	1
98001931	1.72441	1.6935	1.75532	1.03651	0.0517284	1	1
98001932	4.64244	4.71366	4.57122	0.969782	-0.0442673	1	1
98001933	7.30997	3.46996	11.15	3.21329	1.68405	0.244831	1
98001934	7.6024	6.22474	8.98006	1.44264	0.528713	0.552106	1
98001937	8.06061	4.06939	12.0518	2.96158	1.56637	0.0331572	1
98001938	1.04979	0.85567	1.24391	1.45372	0.539754	1	1
98001939	1.40616	0.355691	2.45663	6.90664	2.78798	0.186557	1
98001940	2.85573	5.09299	0.618464	0.121434	-3.04175	0.0324336	1
98001941	733.182	673.16	793.205	1.17833	0.236745	0.541519	1
98001945	3.29537	4.36911	2.22164	0.508489	-0.975712	0.395733	1
98001947	5.99362	3.95744	8.02979	2.02904	1.02079	0.235481	1
98001948	70.8396	79.4402	62.239	0.783471	-0.352049	0.39053	1
98001949	1354.63	1242.25	1467.01	1.18093	0.239923	0.533898	1
98001950	29.9279	29.7197	30.1362	1.01402	0.0200791	0.978479	1
98001951	85.4602	43.3535	127.567	2.94248	1.55703	0.0978183	1
98001953	0.573743	0.570447	0.577039	1.01156	0.0165752	1	1
98001954	1.73785	1.63752	1.83817	1.12253	0.166757	1	1
98001955	0	0	0	NA	NA	NA	NA
98001956	5.40502	4.78413	6.02592	1.25957	0.332926	0.774447	1
98001957	0.886501	1.49659	0.276418	0.184699	-2.43675	0.362618	1
98001959	0.342046	0	0.684093	Inf	Inf	0.6457	1
98001960	2.49073	0.69689	4.28456	6.14812	2.62014	0.0709417	1
98001962	1.19815	1.56705	0.829253	0.52918	-0.91817	0.77121	1
98001964	4.60038	4.2875	4.91327	1.14595	0.196547	0.999203	1
98054164	38.1081	72.1944	4.02171	0.0557066	-4.16601	6.67903e-06	0.00378481
98001966	3684.86	4015.1	3354.62	0.835501	-0.259287	0.461097	1
98001969	2.32281	2.84888	1.79674	0.630684	-0.665011	0.632714	1
98001972	2.31093	1.05258	3.56929	3.39098	1.7617	0.168816	1
98001975	638.954	748.592	529.316	0.707082	-0.50005	0.197438	1
98001976	0.142612	0.285223	0	0	#NAME?	0.975156	1
98001977	719.963	709.027	730.899	1.03085	0.0438301	0.893464	1
98001979	0.953019	1.05258	0.853456	0.810822	-0.302543	1	1
98001980	1.05687	0.341199	1.77254	5.19504	2.37713	0.405936	1
98001984	198.402	192.027	204.777	1.0664	0.0927442	0.843094	1
98001985	0.471644	0	0.943288	Inf	Inf	0.46972	1
98001987	145.332	221.84	68.8243	0.310243	-1.68853	0.0628972	1
98001988	2.40291	1.83778	2.96804	1.61501	0.691545	0.700337	1
98001991	0.316055	0.355691	0.276418	0.777128	-0.363777	1	1
98001993	10794.4	10043.6	11545.2	1.14951	0.201017	0.615082	1
98001994	0.597328	0.341199	0.853456	2.50135	1.3227	0.759924	1
98001995	2.01465	2.66112	1.36819	0.514139	-0.959769	0.52976	1
98001996	819.179	769.821	868.536	1.12823	0.174063	0.618915	1
98001997	707.085	602.207	811.963	1.34831	0.431154	0.259626	1
98002004	676.271	839.722	512.819	0.610701	-0.711461	0.0700736	1
98002013	0.479408	0.682398	0.276418	0.405068	-1.30376	0.962219	1
98002014	3185.33	3511.66	2859.01	0.814146	-0.296641	0.433459	1
98002016	11.0361	0	22.0721	Inf	Inf	0.0574228	1
98002019	0.58565	0	1.1713	Inf	Inf	0.349764	1
98002020	53.1266	60.7614	45.4917	0.748693	-0.417553	0.731414	1
98002021	1.0571	1.83778	0.276418	0.150408	-2.73305	0.299715	1
98002022	22.7505	23.5326	21.9684	0.933532	-0.099229	0.971554	1
98002023	2780.87	3046.01	2515.72	0.825908	-0.275947	0.452505	1
98002024	0.276418	0	0.552835	Inf	Inf	0.654328	1
98002025	83.4759	81.2661	85.6857	1.05438	0.0764013	0.835947	1
98002026	3.96944	3.30203	4.63685	1.40424	0.489791	0.704937	1
98002028	0.618464	0	1.23693	Inf	Inf	0.28195	1
98002029	0.316055	0.355691	0.276418	0.777128	-0.363777	1	1
98002031	637.948	795.1	480.796	0.604698	-0.725713	0.0674701	1
98002032	19.7192	16.9615	22.4768	1.32517	0.406174	0.694911	1
98002033	0.138209	0	0.276418	Inf	Inf	1	1
98002034	0.316055	0.355691	0.276418	0.777128	-0.363777	1	1
98002037	3.53051	3.85799	3.20304	0.830235	-0.268408	0.918617	1
98002038	3.89369	3.51679	4.2706	1.21435	0.28018	0.887023	1
98002039	4.55361	5.08185	4.02537	0.792107	-0.336232	0.737928	1
98002040	0.177846	0.355691	0	0	#NAME?	0.975336	1
98002043	7.94388	11.13	4.75781	0.427478	-1.22608	0.116559	1
98002044	117.591	137.766	97.4163	0.707115	-0.499984	0.29039	1
98002047	87.9683	96.4909	79.4457	0.823349	-0.280423	0.514478	1
98002048	0.150311	0	0.300621	Inf	Inf	1	1
98002050	3.86948	3.31988	4.41908	1.3311	0.412616	0.917671	1
98002052	0.765479	0.570447	0.96051	1.68379	0.751708	1	1
98002053	2680.71	2798.14	2563.28	0.916063	-0.126481	0.764697	1
98002054	12.9005	9.29217	16.5087	1.77663	0.829142	0.280113	1
98002055	1.17557	0.640915	1.71023	2.66842	1.41599	0.647974	1
98002058	155.014	157.405	152.623	0.969616	-0.0445144	0.88206	1
98002059	145.948	106.412	185.483	1.74306	0.801623	0.0488153	1
98002060	565.34	691.826	438.854	0.634341	-0.656669	0.330506	1
98002061	403.573	336.944	470.202	1.39549	0.480772	0.218365	1
98002063	1.23514	0.355691	2.11459	5.94501	2.57168	0.264838	1
98002064	5.09015	3.99892	6.18138	1.54576	0.628318	0.507928	1
98002065	10.5353	14.3089	6.76174	0.472555	-1.08145	0.0546546	1
98002066	0.597751	0	1.1955	Inf	Inf	0.258692	1
98002069	9.16172	7.60203	10.7214	1.41034	0.496039	0.531757	1
98002070	361.166	434.247	288.085	0.663413	-0.592021	0.145617	1
98002072	7.70691	0	15.4138	Inf	Inf	0.160544	1
98002073	36.4601	28.783	44.1372	1.53345	0.616777	0.161679	1
98002075	0.313211	0.626422	0	0	#NAME?	0.614036	1
98002076	0.341623	0.341199	0.342046	1.00248	0.00357869	1	1
98002077	0.73596	0	1.47192	Inf	Inf	0.28129	1
98002079	1.45132	2.04919	0.853456	0.416485	-1.26366	0.606955	1
98002082	5.86238	9.3198	2.40497	0.258049	-1.95428	0.185286	1
98002083	321.379	247.074	395.684	1.60148	0.679407	0.0891436	1
98002084	106.268	115.138	97.3993	0.845938	-0.241377	0.534627	1
98002085	1.88754	1.40827	2.3668	1.68064	0.749012	0.669909	1
98002087	25.0223	27.631	22.4136	0.811178	-0.301909	0.543414	1
98002088	11.0137	9.3535	12.6739	1.35499	0.438284	0.518523	1
98002089	0.690915	0.355691	1.02614	2.88491	1.52853	0.804035	1
98002090	0.972612	0	1.94522	Inf	Inf	0.14491	1
98002091	50.1476	60.3427	39.9525	0.662093	-0.594895	0.166231	1
98002092	4.91395	3.79866	6.02924	1.5872	0.666485	0.48162	1
98002096	0	0	0	NA	NA	NA	NA
98002099	0.276418	0	0.552835	Inf	Inf	0.661799	1
98002101	1.46806	1.42277	1.51335	1.06366	0.0890432	1	1
98002102	2.61399	0.967621	4.26036	4.40292	2.13846	0.156793	1
98002105	3841.9	3497.9	4185.9	1.19669	0.259046	0.498818	1
98002106	1028.37	1011.89	1044.85	1.03257	0.0462448	0.908717	1
98002108	0.769881	0.85567	0.684093	0.799481	-0.322863	0.963894	1
98002112	50.3442	66.8373	33.8512	0.506472	-0.981446	0.0266938	0.941108
98002116	59.3343	49.7016	68.9671	1.38762	0.472616	0.245764	1
98002117	1.77975	1.37929	2.18022	1.58068	0.660547	0.772419	1
98002120	3.68063	3.28754	4.07371	1.23914	0.309336	0.767394	1
98002121	0.601242	0	1.20248	Inf	Inf	0.405896	1
98002122	0.853845	1.0236	0.684093	0.668322	-0.581384	0.959787	1
98002123	2.13139	2.74943	1.51335	0.550422	-0.861391	0.706633	1
98002125	1.79493	2.60514	0.984714	0.377988	-1.40359	0.335704	1
98002127	0.609429	0.341199	0.87766	2.57228	1.36305	0.817578	1
98002128	153.893	179.683	128.103	0.712939	-0.488149	0.375247	1
98002129	1.10227	0.967621	1.23693	1.27832	0.354247	1	1
98002131	0.983966	0.285223	1.68271	5.89962	2.56062	0.4894	1
98002132	1.08062	0.640915	1.52033	2.37212	1.24618	0.634389	1
98002133	0.938921	0.640915	1.23693	1.92994	0.948557	0.862503	1
98002135	0.938921	0.640915	1.23693	1.92994	0.948557	0.833556	1
98002136	9.65469	12.8032	6.5062	0.508171	-0.976613	0.118455	1
98002140	3.94722	3.82765	4.06679	1.06248	0.0874344	0.978279	1
98002141	0.285223	0.570447	0	0	#NAME?	0.574276	1
98002142	0.809955	1.06707	0.552835	0.518085	-0.948739	0.956625	1
98002143	457.123	407.562	506.685	1.24321	0.31407	0.40982	1
98002144	0.512646	0.341199	0.684093	2.00497	1.00358	1	1
98002145	46.5642	35.4444	57.684	1.62745	0.702613	0.39196	1
98002147	0.964913	0.285223	1.6446	5.76602	2.52757	0.613999	1
98002148	0.341199	0.682398	0	0	#NAME?	0.582254	1
98002149	0.805568	0.626422	0.984714	1.57196	0.652569	1	1
98002150	0.602154	0.285223	0.919085	3.22233	1.68811	0.786753	1
98002152	1.58068	0.355691	2.80566	7.88791	2.97964	0.122353	1
98002153	31.6282	33.8457	29.4107	0.868966	-0.202629	0.727085	1
98002154	4.95316	1.89376	8.01257	4.23104	2.08101	0.0291249	0.981966
98002155	14.664	7.92738	21.4007	2.6996	1.43274	0.39654	1
98002156	1.06946	0.967621	1.1713	1.21049	0.275595	1	1
98002157	27.8529	25.1445	30.5613	1.21543	0.281464	0.55998	1
98002161	1.07801	0	2.15601	Inf	Inf	0.115181	1
98002163	1.40727	1.21136	1.60318	1.32345	0.404304	1	1
98002164	1.54281	2.20797	0.87766	0.397497	-1.33099	0.630505	1
98002166	23.6908	19.7094	27.6723	1.40401	0.489558	0.475742	1
98002167	0.650431	0.682398	0.618464	0.90631	-0.141924	1	1
98002171	3.86101	3.11961	4.60241	1.47531	0.561021	0.699505	1
98002174	1.16663	1.99122	0.342046	0.171777	-2.54139	0.262173	1
98002175	0.519892	0.355691	0.684093	1.92328	0.943565	1	1
98002176	0.650007	1.0236	0.276418	0.270045	-1.88873	0.819866	1
98002177	1.85229	1.14089	2.56369	2.24709	1.16806	0.700888	1
98002180	59.1659	68.7085	49.6233	0.72223	-0.46947	0.271927	1
98002181	1.89196	1.53807	2.24584	1.46017	0.546139	0.913072	1
98002182	0.979011	0.69689	1.26113	1.80966	0.855715	0.867986	1
98002183	837.303	816.129	858.477	1.05189	0.0729822	0.841365	1
98002187	2.90323	0.682398	5.12406	7.5089	2.9086	0.0205549	0.846113
98002188	557.966	618.548	497.384	0.804115	-0.314526	0.439171	1
98002191	0.894881	0	1.78976	Inf	Inf	0.139942	1
98002192	0.598435	1.19687	0	0	#NAME?	0.337614	1
98002197	0.690491	0.69689	0.684093	0.981636	-0.0267399	1	1
98002198	0.723435	0.341199	1.10567	3.24054	1.69624	0.546696	1
98002199	0.171023	0	0.342046	Inf	Inf	1	1
98002201	334.509	336.21	332.808	0.989884	-0.0146689	1	1
98002202	9.04909	7.10069	10.9975	1.54879	0.631143	0.635285	1
98002203	57.8143	61.4958	54.1328	0.880268	-0.183986	0.713266	1
98002204	1.34604	1.49659	1.1955	0.79882	-0.324057	0.953316	1
98002207	0.890904	1.78181	0	0	#NAME?	0.218506	1
98002209	1.14142	0.69689	1.58596	2.27576	1.18635	0.660072	1
98002210	299.3	339.041	259.559	0.765568	-0.385397	0.370481	1
98002211	1814.11	1764.7	1863.52	1.05599	0.0786019	0.886792	1
98002212	1.15317	2.00571	0.300621	0.149883	-2.7381	0.268926	1
98002213	1.85742	2.86138	0.853456	0.298267	-1.74532	0.307955	1
98002216	777.231	715.355	839.107	1.17299	0.230196	0.531312	1
98002217	0.906559	0.341199	1.47192	4.31397	2.10901	0.398136	1
98002218	40.4171	46.075	34.7591	0.754403	-0.406593	0.393264	1
98002220	309.619	342.457	276.78	0.808217	-0.307185	0.448348	1
98002221	1.34406	1.28183	1.40629	1.0971	0.133691	1	1
98002223	10.6581	19.4781	1.83817	0.0943713	-3.40551	0.304487	1
98002225	6.33618	2.33441	10.3379	4.4285	2.14682	0.0548389	1
98002227	3.42488	3.04915	3.80062	1.24645	0.317828	0.976187	1
98002228	285.69	295.529	275.852	0.933416	-0.0994074	0.826463	1
98002230	0.454263	0.355691	0.552835	1.55426	0.636223	1	1
98002231	0.32091	0.341199	0.300621	0.881073	-0.182667	1	1
98002234	372.611	389.047	356.174	0.915504	-0.127361	0.725435	1
98002236	71.169	90.7654	51.5725	0.568195	-0.815541	0.125306	1
98002237	1.55996	0.355691	2.76424	7.77145	2.95818	0.180908	1
98002238	1.09849	0.911646	1.28533	1.40991	0.495599	1	1
98002239	4179.63	4682.21	3677.06	0.785325	-0.348638	0.361727	1
98002240	14.5142	10.8612	18.1672	1.67267	0.742153	0.45285	1
98002241	1.04576	1.74947	0.342046	0.195514	-2.35466	0.333563	1
98002243	1.43568	0.926138	1.94522	2.10036	1.07064	0.692776	1
98002244	6.09597	5.1813	7.01063	1.35306	0.436231	0.723092	1
98002245	1.69148	1.93524	1.44772	0.74808	-0.418735	0.942373	1
98002246	0.45142	0.626422	0.276418	0.441264	-1.18029	0.959596	1
98002248	1.45611	1.06707	1.84515	1.72917	0.790079	0.78501	1
98002250	10.7149	8.95297	12.4767	1.39359	0.478802	0.455081	1
98002252	1.25944	1.3648	1.15408	0.845604	-0.241945	1	1
98002253	4.22534	3.87248	4.5782	1.18224	0.241524	0.891143	1
98002254	0.829124	0.355691	1.30256	3.66204	1.87265	0.641386	1
98002257	1.14149	1.66451	0.618464	0.371559	-1.42834	0.61398	1
98002258	208.965	220.609	197.322	0.894442	-0.16094	0.657945	1
98002259	1.76827	1.60854	1.928	1.19861	0.261358	1	1
98002260	2.00832	0.640915	3.37572	5.26703	2.39699	0.163936	1
98067502	26.6792	50.5112	2.84709	0.0563654	-4.14905	4.28271e-10	7.96019e-07
98002262	237.243	271.576	202.911	0.747164	-0.420503	0.276839	1
98002264	3.00945	2.40488	3.61403	1.50279	0.587644	0.756149	1
98002271	1.76736	2.20797	1.32676	0.600896	-0.734812	0.674592	1
98002272	2.57865	2.33441	2.82288	1.20925	0.274111	0.943832	1
98002274	1.03309	0	2.06618	Inf	Inf	0.128419	1
98002276	839.579	936.639	742.518	0.792747	-0.335067	0.400911	1
98002277	28.5272	33.2929	23.7616	0.713715	-0.486579	0.562737	1
98002278	7795.38	7420.85	8169.91	1.10094	0.138736	0.752178	1
98002279	3.94699	4.42843	3.46555	0.782568	-0.353712	0.708578	1
98002280	0.771877	1.26734	0.276418	0.218109	-2.19688	0.579813	1
98002281	1.80044	1.33781	2.26307	1.69163	0.758411	0.808049	1
98002282	1.26137	1.6935	0.829253	0.489669	-1.03012	0.779345	1
98002283	11.8682	13.6646	10.0718	0.737073	-0.440121	0.476243	1
98002284	549.016	499.387	598.645	1.19876	0.261542	0.495377	1
98002285	3.65197	4.48106	2.82288	0.629959	-0.66667	0.579303	1
98002286	5.52351	5.88154	5.16548	0.878253	-0.187292	0.833549	1
98002287	0.459542	0	0.919085	Inf	Inf	0.440627	1
98002288	1174.25	1065.53	1282.97	1.20406	0.26791	0.473071	1
98002289	2.6106	3.17224	2.04896	0.645903	-0.63061	0.834742	1
98002290	9.09085	11.7202	6.46146	0.551308	-0.85907	0.309312	1
98002291	1.39804	0.982114	1.81397	1.847	0.885186	0.711902	1
98002295	120.168	127.023	113.313	0.892071	-0.164769	0.676545	1
98002296	0.177846	0.355691	0	0	#NAME?	0.976946	1
98002297	0.874852	1.19687	0.552835	0.461901	-1.11434	0.81523	1
98002299	138.694	164.369	113.019	0.687593	-0.540373	0.177228	1
98002300	0.414626	0	0.829253	Inf	Inf	0.532778	1
98002301	1.20725	1.30882	1.10567	0.844784	-0.243346	1	1
98002303	54.5037	60.282	48.7253	0.80829	-0.307056	0.480521	1
98002304	81.6381	63.4628	99.8134	1.57279	0.653324	0.175373	1
98002308	479.055	423.795	534.316	1.26079	0.334327	0.408086	1
98002311	1.85758	0.982114	2.73305	2.78283	1.47655	0.364136	1
98002312	0.309232	0	0.618464	Inf	Inf	0.718913	1
98002317	188.933	184.362	193.503	1.04958	0.0698078	0.909065	1
98002318	0.976139	0.926138	1.02614	1.10798	0.147926	1	1
98002322	0.748062	0	1.49612	Inf	Inf	0.168334	1
98002324	0.463945	0.285223	0.642667	2.25321	1.17198	1	1
98002326	1.29128	0.996606	1.58596	1.59136	0.670257	0.865992	1
98002327	0.138209	0	0.276418	Inf	Inf	1	1
98002328	1460.22	1254.1	1666.33	1.3287	0.410014	0.288653	1
98002329	2038.21	2063.47	2012.95	0.975515	-0.0357647	0.918296	1
98002330	2.33144	0.285223	4.37765	15.3482	3.93999	0.0306594	1
98002331	2.42301	1.60854	3.23748	2.01269	1.00912	0.578614	1
98002332	754.252	838.616	669.889	0.798802	-0.324089	0.430665	1
98002333	0.321334	0	0.642667	Inf	Inf	0.610593	1
98002334	56.3827	68.2105	44.5549	0.653198	-0.614408	0.174282	1
98002336	0.91005	0.341199	1.4789	4.33443	2.11584	0.531469	1
98002337	0.348445	0.69689	0	0	#NAME?	0.58925	1
98002338	80.3204	82.7395	77.9012	0.941524	-0.08693	0.896292	1
98002339	0.932099	0.285223	1.57897	5.53592	2.46882	0.477072	1
98002340	7.54897	7.62431	7.47364	0.980238	-0.0287966	0.965516	1
98002341	1.03169	1.37929	0.684093	0.495975	-1.01166	0.754955	1
98002343	12.5445	21.2363	3.85268	0.18142	-2.4626	0.121742	1
98002346	0.447017	0.341199	0.552835	1.62027	0.696236	1	1
98002347	36.5722	29.7611	43.3833	1.45772	0.543711	0.389974	1
98002348	205.704	188.943	222.465	1.17742	0.235626	0.56044	1
98002349	441.733	374.238	509.228	1.36071	0.444356	0.242185	1
98002350	74.6581	73.6846	75.6315	1.02642	0.0376233	0.985274	1
98002351	1.22851	0.570447	1.88658	3.30719	1.72561	0.528863	1
98002352	1179.15	1110.35	1247.95	1.12392	0.168545	0.695945	1
98002356	0.87766	0	1.75532	Inf	Inf	0.157311	1
98002357	1104.43	1292.21	916.651	0.709369	-0.495391	0.209344	1
98002358	0.171023	0	0.342046	Inf	Inf	1	1
98002361	6131.48	6254.41	6008.55	0.960692	-0.0578548	0.838369	1
98002362	1.42688	0.355691	2.49806	7.02311	2.81211	0.195251	1
98002363	0.952566	1.3523	0.552835	0.408812	-1.29049	0.899165	1
98002364	4.38406	3.10512	5.66299	1.82376	0.866914	0.479345	1
98002366	3.71998	2.06368	5.37627	2.60519	1.38139	0.170358	1
98002367	1.22832	0	2.45663	Inf	Inf	0.0855935	1
98002369	7.70586	9.54126	5.87046	0.615271	-0.700707	0.376611	1
98002374	3614.01	3580.04	3647.97	1.01897	0.0271184	0.969885	1
98002375	241.777	246.617	236.938	0.960754	-0.057761	0.862646	1
98002376	7.4857	8.82453	6.14688	0.696567	-0.521666	0.543439	1
98002377	200.09	160.229	239.952	1.49756	0.582609	0.155083	1
98002378	0.177846	0.355691	0	0	#NAME?	0.976571	1
98002379	276.596	295.056	258.135	0.874866	-0.192866	0.593035	1
98002380	9.21047	9.89695	8.52398	0.861273	-0.215457	0.769316	1
98002383	3.83851	4.55352	3.1235	0.685954	-0.543817	0.770376	1
98002386	1.89335	2.76057	1.02614	0.371713	-1.42774	0.346162	1
98002387	4.04067	3.1611	4.92025	1.5565	0.638306	0.589268	1
98002388	3568.34	3064.31	4072.37	1.32897	0.410303	0.294033	1
98002389	2.93536	1.89376	3.97696	2.10003	1.07041	0.443253	1
98002393	0.597328	0.341199	0.853456	2.50135	1.3227	0.80883	1
98002395	3.28272	2.46421	4.10124	1.66432	0.734936	0.686056	1
98002396	0.911386	0.285223	1.53755	5.39068	2.43047	0.40095	1
98002397	0.801589	0	1.60318	Inf	Inf	0.173509	1
98002399	6.48694	4.44293	8.53096	1.92012	0.941198	0.274968	1
98002400	244.66	209.314	280.007	1.33774	0.419795	0.316855	1
98002403	1.42509	0.711383	2.13879	3.00653	1.5881	0.457754	1
98002404	1.17479	0	2.34958	Inf	Inf	0.0678275	1
98002405	0.963154	0.682398	1.24391	1.82285	0.866196	0.834307	1
98002406	76.1854	71.5808	80.7899	1.12865	0.174602	0.742671	1
98002408	3.75809	1.55256	5.96361	3.84114	1.94154	0.086434	1
98002409	0.585844	0.570447	0.601242	1.05398	0.0758533	1	1
98002410	3.76087	2.0347	5.48705	2.69674	1.43122	0.168327	1
98002411	58.2422	50.4377	66.0467	1.30947	0.388985	0.360571	1
98002412	3110.87	2786.42	3435.33	1.23289	0.302039	0.44301	1
98002413	1837.48	1946.67	1728.3	0.887825	-0.171653	0.656738	1
98002415	0.804721	1.30882	0.300621	0.229689	-2.12225	0.503182	1
98002416	1.04098	0.285223	1.79674	6.29943	2.65522	0.391125	1
98002418	6.95727	10.2796	3.63491	0.353603	-1.4998	0.0649021	1
98002419	0.342046	0	0.684093	Inf	Inf	0.715313	1
98002420	1.00543	0	2.01085	Inf	Inf	0.259132	1
98002421	1.39275	1.14089	1.6446	1.4415	0.527575	1	1
98002422	54.904	7.14018	102.668	14.3789	3.84588	0.00273222	0.289199
98002423	0.171023	0	0.342046	Inf	Inf	1	1
98002424	227.406	230.048	224.765	0.977035	-0.0335176	0.951317	1
98002425	82.1657	109.107	55.2243	0.506148	-0.982369	0.022054	0.881156
98002426	0.171023	0	0.342046	Inf	Inf	1	1
98002429	42.9903	32.9671	53.0135	1.60807	0.685335	0.147398	1
98002430	0.447441	0	0.894881	Inf	Inf	0.473469	1
98002433	3.78518	2.40488	5.16548	2.14792	1.10294	0.284418	1
98002436	0.471644	0	0.943288	Inf	Inf	0.479153	1
98002437	716.68	698.277	735.083	1.05271	0.0741071	0.813084	1
98002438	1.26808	0	2.53617	Inf	Inf	0.0638201	1
98002442	0.814358	1.3523	0.276418	0.204406	-2.29049	0.5744	1
98002443	2146.02	2010.57	2281.48	1.13475	0.18237	0.879469	1
98002444	20.0454	13.5928	26.4981	1.94942	0.963043	0.0700384	1
98002445	0.636512	0.996606	0.276418	0.277359	-1.85017	0.745516	1
98002447	145.09	137.82	152.361	1.10551	0.144713	0.744291	1
98002448	0.727838	0.626422	0.829253	1.32379	0.404676	1	1
98002449	0.822301	0	1.6446	Inf	Inf	0.376135	1
98002451	1.18397	1.74947	0.618464	0.353515	-1.50016	0.58895	1
98002452	2.46431	3.68471	1.24391	0.337586	-1.56667	0.231321	1
98002454	0.419029	0.285223	0.552835	1.93825	0.954757	1	1
98002455	171.284	219.249	123.319	0.562462	-0.830173	0.0386547	1
98002456	478.609	453.355	503.862	1.11141	0.152385	0.669661	1
98002458	285.87	301.43	270.31	0.89676	-0.157206	0.622653	1
98002460	1.58978	0.982114	2.19744	2.23746	1.16186	0.724986	1
98002463	1.40727	1.21136	1.60318	1.32345	0.404304	1	1
98002464	2055.26	1750.29	2360.22	1.34848	0.431332	0.276145	1
98002465	0.479408	0.682398	0.276418	0.405068	-1.30376	0.966268	1
98002467	6.21481	5.32224	7.10739	1.33541	0.417287	0.577668	1
98002468	0.292922	0.285223	0.300621	1.05398	0.0758533	1	1
98002470	3.19319	4.19919	2.1872	0.520862	-0.941026	0.375478	1
98002471	0.822301	0	1.6446	Inf	Inf	0.381327	1
98002473	193.9	216.698	171.102	0.789589	-0.340825	0.396258	1
98002474	4842.47	4238.45	5446.48	1.28502	0.361786	0.355004	1
98002476	2.33058	3.53128	1.12987	0.319961	-1.64403	0.260676	1
98002477	956.447	1049.48	863.417	0.822712	-0.28154	0.438869	1
98002478	2.45921	2.00571	2.91272	1.45221	0.538252	0.846226	1
98002481	33.1052	28.8767	37.3337	1.29287	0.370573	0.539551	1
98002482	234.987	218.413	251.561	1.15177	0.20385	0.590268	1
98002483	1.03254	0.69689	1.36819	1.96327	0.97326	0.82453	1
98002484	0.636964	0.69689	0.577039	0.828019	-0.272264	1	1
98002487	2.80262	4.75179	0.853456	0.179607	-2.47708	0.0950229	1
98002489	339.455	332.923	345.986	1.03924	0.0555278	0.868175	1
98002490	2.77723	2.73159	2.82288	1.03342	0.0474308	1	1
98002493	1.25216	1.30882	1.1955	0.91342	-0.13065	1	1
98002494	384.695	355.798	413.593	1.16244	0.217154	0.55903	1
98002497	1.76978	2.27844	1.26113	0.553507	-0.853325	0.648717	1
98002500	243.631	272.903	214.359	0.785476	-0.348361	0.394857	1
98002501	1.054	0.570447	1.53755	2.69534	1.43047	0.706073	1
98002502	0.533537	1.06707	0	0	#NAME?	0.315549	1
98002505	1.27591	1.60854	0.943288	0.586427	-0.769978	0.767639	1
98002507	18.214	18.319	18.109	0.988539	-0.0166306	1	1
98002508	895.516	777.638	1013.39	1.30317	0.382025	0.350188	1
98002509	26.3712	33.5382	19.2043	0.572609	-0.804377	0.256884	1
98002512	4.38257	3.7137	5.05145	1.36022	0.443839	0.719327	1
98002513	139.369	141.508	137.23	0.969771	-0.0442836	0.919663	1
98002514	859.599	862.244	856.954	0.993864	-0.0088799	0.985895	1
98002515	0.85016	0.570447	1.12987	1.98068	0.985997	0.81526	1
98002517	0	0	0	NA	NA	NA	NA
98002518	213.488	195.231	231.745	1.18703	0.247357	0.591038	1
98002522	2.78898	2.63413	2.94384	1.11758	0.160374	0.949418	1
98002523	7.45798	8.74157	6.1744	0.706326	-0.501593	0.4878	1
98002525	1072.19	1196.66	947.728	0.79198	-0.336465	0.414835	1
98002526	0.622867	0.285223	0.96051	3.36757	1.75171	0.73954	1
98002529	1.77561	0.341199	3.21002	9.40805	3.2339	0.15862	1
98002531	1215.74	1358.13	1073.34	0.790307	-0.339514	0.398532	1
98002532	1142.29	1249.68	1034.89	0.828124	-0.272082	0.518319	1
98002533	2.41547	1.53807	3.29287	2.14091	1.09823	0.591788	1
98002534	0.570447	1.14089	0	0	#NAME?	0.238545	1
98002535	20.287	12.9499	27.6242	2.13316	1.09299	0.0415487	1
98002538	499.404	433.394	565.414	1.30462	0.383629	0.316465	1
98002541	2.55424	3.28754	1.82095	0.553894	-0.852319	0.51787	1
98002542	723.049	668.625	777.473	1.16279	0.217594	0.573318	1
98002544	0.925907	0.355691	1.49612	4.20624	2.07253	0.412602	1
98002545	0.87516	1.40827	0.342046	0.242883	-2.04166	0.540875	1
98002546	0.487078	0.355691	0.618464	1.73877	0.798063	1	1
98002548	15.7826	22.3882	9.17695	0.409902	-1.28665	0.307651	1
98002549	2.06119	1.89376	2.22862	1.17682	0.234899	1	1
98002550	1760.85	1527.68	1994.03	1.30527	0.384345	0.335043	1
98002551	2236.97	2063.62	2410.32	1.16801	0.224047	0.602808	1
98002552	0.69985	0.570447	0.829253	1.45369	0.539719	1	1
98002553	1.09165	0.711383	1.47192	2.0691	1.049	0.665792	1
98002554	671.905	668.304	675.505	1.01077	0.0154617	0.973544	1
98002555	110.073	100.691	119.454	1.18634	0.246514	0.517095	1
98002558	0.764143	0.626422	0.901863	1.4397	0.525773	1	1
98002559	18.4933	14.6073	22.3794	1.53208	0.615487	0.427704	1
98002560	1198.94	1178.37	1219.51	1.03492	0.0495152	0.887337	1
98002561	15.8071	11.2004	20.4138	1.82259	0.865994	0.148824	1
98002563	1.71102	2.52018	0.901863	0.357856	-1.48255	0.409082	1
98002564	132.737	155.194	110.28	0.71059	-0.49291	0.253178	1
98002565	2.48469	4.62734	0.342046	0.0739186	-3.75792	0.106463	1
98002567	129.407	4.73929	254.074	53.6102	5.74444	0.0203255	0.845706
98002568	1177.23	1193.52	1160.94	0.972704	-0.0399275	0.908473	1
98002569	0.661656	1.32331	0	0	#NAME?	0.212064	1
98002570	0.74147	1.14089	0.342046	0.299806	-1.7379	0.541787	1
98002572	5.19054	6.425	3.95608	0.615732	-0.699626	0.716785	1
98002573	2.35655	3.33102	1.38209	0.414915	-1.26911	0.627432	1
98002576	128.881	146.486	111.276	0.759634	-0.396623	0.369245	1
98002578	0.150311	0	0.300621	Inf	Inf	1	1
98002579	6.93173	5.16681	8.69666	1.68318	0.751189	0.401172	1
98002581	0.328156	0.355691	0.300621	0.845174	-0.24268	1	1
98002583	12.394	18.9487	5.83933	0.308165	-1.69823	0.0109419	0.643593
98002585	0.704253	0.85567	0.552835	0.646084	-0.630206	0.969789	1
98002588	0.499179	0.355691	0.642667	1.80681	0.853446	1	1
98002590	0.454263	0.355691	0.552835	1.55426	0.636223	1	1
98002591	1.68716	2.77307	0.601242	0.216815	-2.20547	0.218572	1
98002592	34.6563	23.7454	45.5673	1.919	0.940354	0.048373	1
98002594	114.861	134.222	95.4989	0.711498	-0.491068	0.262128	1
98002596	0.171023	0	0.342046	Inf	Inf	1	1
98002598	2.60558	2.30543	2.90573	1.26039	0.333869	0.937924	1
98002600	378.974	480.674	277.273	0.576841	-0.793754	0.0458873	1
98002602	445.221	466.724	423.717	0.907854	-0.139467	0.719238	1
98002605	0.835099	1.39378	0.276418	0.198322	-2.33408	0.524529	1
98002606	1.86838	1.96423	1.77254	0.902411	-0.148143	1	1
98002607	5.05026	2.98982	7.11071	2.37831	1.24993	0.16307	1
98002608	2.93562	3.43183	2.43941	0.71082	-0.492444	0.684967	1
98002609	568.231	569.948	566.514	0.993974	-0.00872017	0.97141	1
98002610	2.09602	0.626422	3.56562	5.69204	2.50895	0.358408	1
98002611	1.11344	0.640915	1.58596	2.47452	1.30715	0.660554	1
98002612	0	0	0	NA	NA	NA	NA
98002613	495.321	462.273	528.369	1.14298	0.192803	0.811875	1
98002615	143.443	116.467	170.419	1.46324	0.549165	0.156608	1
98002616	2296.91	2118.52	2475.29	1.1684	0.224538	0.552688	1
98002618	0.955455	0.967621	0.943288	0.974853	-0.0367436	1	1
98002619	589.324	644.478	534.17	0.828842	-0.270831	0.52235	1
98002620	9906.33	10186.5	9626.18	0.944997	-0.0816189	0.820359	1
98002622	345.792	275.46	416.123	1.51064	0.595164	0.136185	1
98002625	0.938074	1.32331	0.552835	0.417766	-1.25923	0.775506	1
98002626	21.5589	25.8144	17.3035	0.670304	-0.577112	0.253673	1
98002627	0	0	0	NA	NA	NA	NA
98002629	0.797869	0.911646	0.684093	0.750393	-0.414282	0.962292	1
98002630	0.867913	1.39378	0.342046	0.245409	-2.02674	0.539305	1
98002632	1.95712	1.99321	1.92102	0.963781	-0.0532227	1	1
98002634	355.568	377.31	333.826	0.884754	-0.176652	0.704316	1
98002636	63.8402	64.0319	63.6485	0.994012	-0.00866411	0.996577	1
98002638	1.43043	1.32331	1.53755	1.16189	0.216478	1	1
98002640	0.171023	0	0.342046	Inf	Inf	1	1
98002644	1.33823	2.33441	0.342046	0.146524	-2.7708	0.170353	1
98002646	0.741046	1.48209	0	0	#NAME?	0.219014	1
98002647	333.547	355.955	311.139	0.874096	-0.194136	0.633437	1
98002650	0.920192	0.85567	0.984714	1.15081	0.202649	1	1
98002652	1.8344	2.43187	1.23693	0.508632	-0.975305	0.580202	1
98002653	8.11463	9.70584	6.52343	0.672114	-0.573222	0.453017	1
98002655	0.138209	0	0.276418	Inf	Inf	1	1
98002656	0.308808	0.341199	0.276418	0.810136	-0.303764	1	1
98002658	0.309232	0	0.618464	Inf	Inf	0.600198	1
98002660	2.54119	0.355691	4.72668	13.2887	3.73213	0.0248756	0.917377
98002661	2.65745	2.30543	3.00947	1.30538	0.384475	0.825055	1
98002662	0.662504	0.640915	0.684093	1.06737	0.0940589	1	1
98002664	1.41497	0.926138	1.9038	2.05563	1.03958	0.709413	1
98002666	11.3465	11.3322	11.3608	1.00252	0.00363	1	1
98002667	2014.18	1937.48	2090.88	1.07917	0.109928	0.80361	1
98002668	7.38798	8.18697	6.58899	0.804815	-0.313271	0.751818	1
98002671	286.09	284.725	287.454	1.00958	0.013761	0.963429	1
98002672	0.815234	0.711383	0.919085	1.29197	0.369572	1	1
98002675	258.848	237.392	280.304	1.18076	0.23972	0.688696	1
98002676	0.313635	0.285223	0.342046	1.19922	0.262099	1	1
98002679	0.999902	1.42277	0.577039	0.405575	-1.30196	0.780225	1
98002680	1240.33	1177.89	1302.77	1.10602	0.145377	0.77387	1
98002681	4.86129	7.01374	2.70885	0.38622	-1.3725	0.135358	1
98002683	21.0081	4.13986	37.8764	9.14921	3.19365	0.0727543	1
98002685	0.56934	0.285223	0.853456	2.99224	1.58122	0.798061	1
98002686	7.6595	8.99246	6.32654	0.703539	-0.507299	0.564617	1
98002687	2.3409	1.32331	3.3585	2.53795	1.34366	0.339973	1
98002690	601.93	595.524	608.337	1.02152	0.0307115	0.920478	1
98002691	189.347	191.767	186.927	0.974764	-0.0368754	0.975176	1
98002692	0.62727	0.570447	0.684093	1.19922	0.262099	1	1
98002694	1.13551	0.626422	1.6446	2.62539	1.39253	0.648277	1
98002695	0.650855	0.341199	0.96051	2.8151	1.49319	0.777864	1
98002700	54.855	77.4624	32.2476	0.4163	-1.26431	0.0354857	1
98002701	0.82103	1.0236	0.618464	0.604207	-0.726886	0.967837	1
98002702	6.59529	6.10409	7.0865	1.16094	0.215298	0.820681	1
98002703	302.295	312.316	292.274	0.935828	-0.095685	0.781653	1
98002707	12.0686	11.8433	12.2938	1.03804	0.053857	0.935627	1
98002710	3.9214	6.00463	1.83817	0.306125	-1.70781	0.0801935	1
98002711	189.943	220.073	159.813	0.726184	-0.461593	0.23836	1
98002713	404.353	233.362	575.345	2.46546	1.30186	0.00106093	0.162701
98002714	26.5014	30.7722	22.2306	0.722424	-0.469082	0.387239	1
98002716	103.518	95.5775	111.458	1.16615	0.221758	0.635563	1
98002717	1.76135	2.69345	0.829253	0.307877	-1.69957	0.430667	1
98002720	0.138209	0	0.276418	Inf	Inf	1	1
98002721	4.92584	3.19008	6.66161	2.08822	1.06228	0.276825	1
98002722	0.967462	0	1.93492	Inf	Inf	0.464629	1
98002724	1.4561	0.911646	2.00055	2.19444	1.13385	0.611708	1
98002725	98.9538	154.486	43.422	0.281075	-1.83098	0.0634649	1
98002726	45.834	48.1843	43.4837	0.902446	-0.148087	0.720889	1
98002727	0.150311	0	0.300621	Inf	Inf	1	1
98002730	98.525	117.577	79.4728	0.67592	-0.565075	0.375204	1
98002731	2.30994	1.93524	2.68464	1.38724	0.472217	0.852272	1
98002732	251.285	281.17	221.4	0.787423	-0.344789	0.36533	1
98002733	1444.11	1466.64	1421.59	0.969285	-0.0450064	0.849055	1
98002736	0.622443	0.626422	0.618464	0.987295	-0.0184463	1	1
98002737	0.280821	0.285223	0.276418	0.969126	-0.0452432	1	1
98002740	2.11776	2.23496	2.00055	0.895118	-0.15985	1	1
98002741	7.45122	6.17791	8.72453	1.41221	0.497959	0.520789	1
98002742	1.52897	0.926138	2.13181	2.30183	1.20278	0.600325	1
98002743	1.87742	1.62303	2.13181	1.31348	0.39339	0.90877	1
98002744	0.56934	0.285223	0.853456	2.99224	1.58122	0.757949	1
98002745	180.481	223.988	136.975	0.611529	-0.709507	0.0714809	1
98002747	142.128	157.005	127.25	0.810483	-0.303145	0.52972	1
98002749	672.836	693.951	651.721	0.939145	-0.0905804	0.782263	1
98002750	25.0744	12.4169	37.7318	3.03873	1.60347	0.10085	1
98002756	1.23514	0.355691	2.11459	5.94501	2.57168	0.160743	1
98002757	8.02479	13.9592	2.09038	0.14975	-2.73938	0.123855	1
98002758	2.75807	3.44297	2.07316	0.602144	-0.73182	0.691332	1
98002760	241.982	253.956	230.008	0.905701	-0.142893	0.762303	1
98002761	11.2312	8.06831	14.3941	1.78403	0.835138	0.498623	1
98002762	2.60301	4.31114	0.894881	0.207574	-2.2683	0.114365	1
98002763	402.481	405.88	399.082	0.98325	-0.0243692	0.977629	1
98002765	965.698	992.803	938.594	0.945398	-0.0810057	0.838018	1
98002766	0.171023	0	0.342046	Inf	Inf	1	1
98002767	0.342046	0	0.684093	Inf	Inf	0.634432	1
98002768	0.170599	0.341199	0	0	#NAME?	0.975247	1
98002769	168.549	157.478	179.62	1.1406	0.189792	0.642519	1
98002770	1.7396	0.355691	3.1235	8.7815	3.13447	0.0662022	1
98002771	0.288519	0	0.577039	Inf	Inf	0.657729	1
98002772	8.21932	5.13647	11.3022	2.20038	1.13775	0.0874301	1
98002774	3.83484	2.74943	4.92025	1.78955	0.839599	0.518668	1
98002775	1.17515	0.982114	1.36819	1.3931	0.478302	1	1
98002776	508.764	481.579	535.95	1.1129	0.154326	0.681867	1
98002777	0.150311	0	0.300621	Inf	Inf	1	1
98002778	1.08744	0.996606	1.17828	1.18229	0.241588	1	1
98002780	4.2628	3.44297	5.08263	1.47624	0.561922	0.541911	1
98002782	2885.13	2367.78	3402.49	1.43699	0.523053	0.183063	1
98002784	1.49084	0.355691	2.626	7.3828	2.88417	0.13727	1
98002786	567.134	580.24	554.028	0.954827	-0.0666893	0.888418	1
98002790	0.601278	0.926138	0.276418	0.298463	-1.74438	0.70059	1
98002791	4.05402	3.69921	4.40884	1.19183	0.253183	0.88573	1
98002792	0.150311	0	0.300621	Inf	Inf	1	1
98002795	1420.32	1350.15	1490.48	1.10394	0.14266	0.7795	1
98002796	1.14919	1.37929	0.919085	0.666347	-0.585654	0.950315	1
98002799	3797.13	3850.23	3744.02	0.972416	-0.0403548	0.882773	1
98002800	2.01407	1.06707	2.96106	2.77494	1.47245	0.297859	1
98002801	618.241	655.682	580.799	0.885795	-0.174956	0.630979	1
98002802	1.13751	1.03809	1.23693	1.19154	0.252831	1	1
98002803	405.586	329.857	481.315	1.45917	0.545143	0.17435	1
98002804	5.0337	6.43614	3.63125	0.564197	-0.825728	0.466887	1
98002805	3.56133	3.44632	3.67634	1.06674	0.0932133	1	1
98002808	0.342046	0	0.684093	Inf	Inf	0.657226	1
98002812	1.32788	1.05258	1.60318	1.52309	0.607002	0.86875	1
98002813	1.6406	1.05258	2.22862	2.11729	1.08222	0.61811	1
98002814	5.07844	3.61624	6.54065	1.80869	0.854943	0.465352	1
98002815	5.68774	5.87819	5.49729	0.935201	-0.096652	0.989318	1
98002816	332.009	279.28	384.737	1.3776	0.46216	0.2396	1
98002818	0.309232	0	0.618464	Inf	Inf	0.703777	1
98002819	1.92984	3.17559	0.684093	0.215422	-2.21476	0.110837	1
98002820	475.388	421.307	529.469	1.25673	0.329676	0.405066	1
98002821	657.198	703.325	611.072	0.868834	-0.202848	0.599342	1
98002822	10.821	8.86801	12.774	1.44046	0.526532	0.391398	1
98002825	2.39882	1.76396	3.03367	1.7198	0.782244	0.505865	1
98002826	0.690068	1.03809	0.342046	0.329496	-1.60167	0.735723	1
98002828	0.951023	0.640915	1.26113	1.9677	0.976514	0.809612	1
98002829	1.76575	0.570447	2.96106	5.19078	2.37595	0.211022	1
98002830	244.544	226.96	262.128	1.15495	0.207833	0.632699	1
98002831	0	0	0	NA	NA	NA	NA
98002832	0.321334	0	0.642667	Inf	Inf	0.595016	1
98002835	1.35753	1.26734	1.44772	1.14233	0.191979	1	1
98002838	0.414626	0	0.829253	Inf	Inf	0.451847	1
98002839	3.57055	5.43419	1.70691	0.314106	-1.67068	0.153413	1
98002840	0.4939	0.711383	0.276418	0.388564	-1.36378	0.966846	1
98002841	4.46916	2.76392	6.1744	2.23393	1.15958	0.286085	1
98002844	0.171023	0	0.342046	Inf	Inf	1	1
98002845	157.723	182.285	133.162	0.730514	-0.453016	0.258319	1
98002847	0.171023	0	0.342046	Inf	Inf	1	1
98002848	0.32091	0.341199	0.300621	0.881073	-0.182667	1	1
98002849	0.772754	0.626422	0.919085	1.4672	0.553062	1	1
98002851	3.09855	4.09973	2.09737	0.511586	-0.966952	0.457089	1
98002853	4.80046	7.22714	2.37378	0.328454	-1.60624	0.200742	1
98002854	6.3069	7.27197	5.34183	0.734578	-0.445013	0.68108	1
98002857	0.414626	0	0.829253	Inf	Inf	0.52774	1
98002858	423.02	443.466	402.573	0.907787	-0.139574	0.70958	1
98002859	1876.25	2238.08	1514.41	0.676659	-0.563499	0.217255	1
98002861	1.13793	0.69689	1.57897	2.26574	1.17998	0.671127	1
98002862	0.596875	0.640915	0.552835	0.862572	-0.213283	1	1
98002863	2.4101	3.17559	1.6446	0.517889	-0.949285	0.446433	1
98002865	6.14585	4.92506	7.36664	1.49575	0.580866	0.503583	1
98002868	2.57277	2.30543	2.84011	1.23192	0.300911	0.93897	1
98002869	0.427835	0.85567	0	0	#NAME?	0.415647	1
98002870	4.51178	4.0549	4.96866	1.22535	0.29319	0.794008	1
98002871	0.458666	0.640915	0.276418	0.431286	-1.21328	0.964745	1
98002872	143.14	141.817	144.463	1.01866	0.026671	0.96322	1
98002874	583.733	676.834	490.631	0.72489	-0.464166	0.254909	1
98002875	306.847	335.412	278.283	0.829675	-0.269382	0.487111	1
98002876	657.219	749.709	564.729	0.753264	-0.408773	0.376257	1
98002877	1643.18	1475.15	1811.2	1.22781	0.296091	0.435877	1
98002879	529.067	449.052	609.081	1.35637	0.43975	0.254913	1
98002880	158.231	187.943	128.52	0.683826	-0.548298	0.290879	1
98002883	3.45455	3.61624	3.29287	0.910578	-0.135146	1	1
98002884	139.602	150.405	128.799	0.85635	-0.223727	0.580569	1
98002886	0.348445	0.69689	0	0	#NAME?	0.600641	1
98002887	1189.17	1125.6	1252.73	1.11294	0.154374	0.682043	1
98002888	0.901704	0.355691	1.44772	4.07015	2.02508	0.466757	1
98002889	6.88614	9.13874	4.63353	0.507021	-0.979883	0.282558	1
98002890	73.8916	60.3209	87.4622	1.44995	0.536003	0.233209	1
98002891	292.889	232.778	353	1.51646	0.60071	0.128921	1
98002892	104.862	107.418	102.306	0.952405	-0.0703527	0.870121	1
98002896	168.168	168.214	168.121	0.999445	-0.000801538	1	1
98002897	22962	24731.9	21192.2	0.856878	-0.222838	0.563695	1
98002898	9.46896	12.3592	6.57875	0.532298	-0.909695	0.161365	1
98002899	1.37642	0.69689	2.05594	2.95016	1.56079	0.452855	1
98002900	1.24006	1.30882	1.1713	0.894927	-0.160157	1	1
98002902	1.95505	2.17898	1.73112	0.79446	-0.331953	0.935721	1
98002905	0	0	0	NA	NA	NA	NA
98002906	0.760652	0.626422	0.894881	1.42856	0.514561	1	1
98002908	0.886271	0	1.77254	Inf	Inf	0.179972	1
98002909	55.3853	57.8816	52.8889	0.913744	-0.130138	0.789789	1
98002910	1259.02	1343.13	1174.9	0.874748	-0.19306	0.691381	1
98002911	3343.65	3216.6	3470.7	1.079	0.109689	0.788365	1
98002912	1.94382	1.53807	2.34958	1.52762	0.611283	0.764622	1
98002913	740.903	748.021	733.784	0.980967	-0.0277228	0.972283	1
98002914	1.35257	1.679	1.02614	0.611159	-0.71038	0.805922	1
98002915	3.55997	3.46081	3.65912	1.0573	0.080385	1	1
98002916	313.627	254.559	372.695	1.46408	0.549993	0.163844	1
98002917	801.559	717.814	885.305	1.23334	0.302566	0.431282	1
98002919	0.447017	0.341199	0.552835	1.62027	0.696236	1	1
98002920	0.86749	1.73498	0	0	#NAME?	0.193067	1
98002921	2.52585	1.89376	3.15795	1.66755	0.737734	0.692292	1
98002922	7.51454	6.58423	8.44485	1.28259	0.359058	0.753332	1
98002924	4.4193	4.77878	4.05981	0.84955	-0.235229	0.930105	1
98002925	1.58753	1.63752	1.53755	0.938949	-0.0908813	1	1
98002931	1.01225	0.355691	1.66881	4.69172	2.23012	0.560829	1
98002932	0.426728	0	0.853456	Inf	Inf	0.459964	1
98002933	0.66338	0	1.32676	Inf	Inf	0.34959	1
98002934	642.713	628.648	656.777	1.04475	0.0631521	0.892236	1
98002935	922.532	1122.04	723.026	0.644387	-0.634001	0.0915199	1
98002937	2.4072	2.67561	2.13879	0.799366	-0.323073	0.936222	1
98002938	0.76369	0.926138	0.601242	0.649192	-0.623282	0.952804	1
98002942	0.792978	0	1.58596	Inf	Inf	0.297297	1
98002943	0.877696	0.926138	0.829253	0.895388	-0.159416	1	1
98002947	0.64949	0.355691	0.943288	2.65199	1.40707	0.795253	1
98002948	0.577039	0	1.15408	Inf	Inf	0.337642	1
98002949	1.4649	1.48209	1.44772	0.976806	-0.0338564	1	1
98002950	1202.96	1092.89	1313.03	1.20143	0.264747	0.536217	1
98002951	6.51838	3.61425	9.42252	2.60705	1.38242	0.0680723	1
98002953	0.313211	0.626422	0	0	#NAME?	0.599117	1
98002954	2.08629	2.33441	1.83817	0.787423	-0.344789	0.94583	1
98002956	1.94481	2.94634	0.943288	0.320156	-1.64315	0.305808	1
98002957	20.3073	12.1194	28.4951	2.3512	1.23339	0.0921966	1
98002958	0.691044	0	1.38209	Inf	Inf	0.609833	1
98002959	0.177846	0.355691	0	0	#NAME?	0.974645	1
98002962	0.954126	1.90825	0	0	#NAME?	0.157338	1
98002963	27.1847	21.8217	32.5477	1.49153	0.57679	0.489519	1
98002967	3.84996	3.08728	4.61265	1.49408	0.57926	0.576557	1
98002969	0.613832	0.626422	0.601242	0.959803	-0.0591898	1	1
98002970	1.40202	1.60854	1.1955	0.743224	-0.428131	0.950747	1
98002971	0.177846	0.355691	0	0	#NAME?	0.975709	1
98002973	6.65371	6.28986	7.01755	1.11569	0.157941	0.813415	1
98002976	0.606133	0.911646	0.300621	0.329756	-1.60053	0.704951	1
98002977	1.30871	1.76396	0.853456	0.483828	-1.04743	0.813204	1
98002979	0.499179	0.355691	0.642667	1.80681	0.853446	1	1
98002981	367.746	329.297	406.195	1.23352	0.302783	0.41528	1
98002982	2.52103	1.94973	3.09232	1.58602	0.665411	0.715669	1
98002984	0.471644	0	0.943288	Inf	Inf	0.441162	1
98002986	942.831	1136.14	749.525	0.659714	-0.600088	0.127519	1
98002989	1.23043	2.46085	0	0	#NAME?	0.0863366	1
98002991	0.732664	0.570447	0.894881	1.56874	0.649604	1	1
98002993	0.321334	0	0.642667	Inf	Inf	0.652815	1
98002994	192.417	227.862	156.973	0.688896	-0.537642	0.171657	1
98002995	0.463945	0.285223	0.642667	2.25321	1.17198	1	1
98002998	87.8489	86.2251	89.4727	1.03766	0.0533402	0.902114	1
98003000	9.40995	8.69274	10.1272	1.16501	0.220346	0.752444	1
98003001	850.43	659.29	1041.57	1.57984	0.659775	0.0810002	1
98003003	12.6998	4.3816	21.0179	4.79686	2.26209	0.00576033	0.463089
98003005	540.715	426.798	654.632	1.53382	0.61713	0.113834	1
98003006	1.7685	0.69689	2.84011	4.0754	2.02694	0.282213	1
98003010	1.93401	1.96423	1.9038	0.969235	-0.0450812	1	1
98003012	379.575	348.045	411.104	1.18118	0.240227	0.562817	1
98003017	0.138209	0	0.276418	Inf	Inf	1	1
98003018	1128.44	1096.12	1160.76	1.05897	0.0826553	0.857779	1
98003020	0.288519	0	0.577039	Inf	Inf	0.652233	1
98003021	0.313211	0.626422	0	0	#NAME?	0.612244	1
98003022	0.506002	0.711383	0.300621	0.422587	-1.24268	0.9691	1
98003023	7.94203	1.73498	14.1491	8.15519	3.02772	0.141663	1
98003024	0.276418	0	0.552835	Inf	Inf	0.625676	1
98003025	1.49195	1.21136	1.77254	1.46326	0.549189	0.891076	1
98003027	5.83971	4.35461	7.32481	1.68208	0.750247	0.548704	1
98003028	31.393	46.1522	16.6338	0.360411	-1.47228	0.00280209	0.292595
98003029	1.63885	2.33441	0.943288	0.40408	-1.30729	0.565079	1
98003031	5.83555	2.23496	9.43614	4.22207	2.07795	0.0169086	0.774089
98003032	780.154	624.453	935.855	1.49868	0.583691	0.123079	1
98003033	4.95566	3.08728	6.82405	2.21038	1.14429	0.23842	1
98003034	442.828	477.627	408.029	0.854285	-0.227211	0.581556	1
98003035	953.246	1012.96	893.535	0.882105	-0.180977	0.65454	1
98003037	1.06435	1.85228	0.276418	0.149231	-2.74438	0.261276	1
98003038	1.13098	0.85567	1.40629	1.6435	0.716769	0.877077	1
98003039	1.83596	0.69689	2.97503	4.269	2.0939	0.248192	1
98003040	19.9429	14.4735	25.4124	1.75579	0.812122	0.590873	1
98003042	0.447441	0	0.894881	Inf	Inf	0.403503	1
98003044	100.192	95.6658	104.718	1.09462	0.130433	0.750289	1
98003045	310.351	322.963	297.739	0.9219	-0.117318	0.780488	1
98003047	9.36823	11.7742	6.96223	0.591311	-0.758011	0.260347	1
98003051	22.3264	24.661	19.9917	0.810662	-0.302827	0.708359	1
98003052	118.933	124.342	113.524	0.912993	-0.131324	0.694878	1
98003054	1337.88	1303.75	1372.01	1.05235	0.0736174	0.86746	1
98003055	1628.69	1654.22	1603.16	0.969134	-0.0452312	0.882574	1
98003056	0.492357	0	0.984714	Inf	Inf	0.409375	1
98003057	1.32806	1.77846	0.87766	0.493495	-1.01889	0.862208	1
98003058	2.09332	0.69689	3.48975	5.00761	2.32412	0.177064	1
98003059	70.7884	61.1948	80.3821	1.31355	0.393467	0.331488	1
98003061	0.447017	0.341199	0.552835	1.62027	0.696236	1	1
98003063	1.67657	0.682398	2.67074	3.91376	1.96856	0.61986	1
98003064	1.36565	0.640915	2.09038	3.26156	1.70556	0.45447	1
98003065	3.63988	2.0347	5.24507	2.57782	1.36615	0.212765	1
98003066	0.637388	0.355691	0.919085	2.58394	1.36957	0.795198	1
98003067	888.918	858.135	919.702	1.07174	0.0999607	0.845185	1
98003068	0	0	0	NA	NA	NA	NA
98003069	3.18862	1.78181	4.59542	2.57908	1.36686	0.297835	1
98003070	302.069	289.949	314.19	1.0836	0.115839	0.751971	1
98003071	3531.33	3890.92	3171.73	0.815161	-0.294843	0.431332	1
98003073	12.983	8.02683	17.9392	2.23491	1.16022	0.179186	1
98003074	1.36763	0.85567	1.8796	2.19663	1.13529	0.736491	1
98003076	1.11236	0.711383	1.51335	2.12733	1.08904	0.627384	1
98053249	11.6351	22.009	1.26113	0.0573006	-4.1253	7.11665e-07	0.000569828
98003078	1.04917	0.626422	1.47192	2.34972	1.23249	0.659139	1
98003080	1.20412	2.40823	0	0	#NAME?	0.140357	1
98003081	1.58942	0	3.17883	Inf	Inf	0.0499916	1
98003083	878.09	839.242	916.937	1.09258	0.127735	0.770713	1
98003084	2.10255	3.37585	0.829253	0.245642	-2.02537	0.195541	1
98003085	194.987	240.884	149.09	0.618927	-0.692159	0.0930561	1
98003086	2.19914	0.355691	4.04259	11.3654	3.50658	0.0494895	1
98003087	0.288519	0	0.577039	Inf	Inf	0.613518	1
98003089	1205.68	1116.37	1294.99	1.16001	0.214133	0.565239	1
98003090	0.276418	0	0.552835	Inf	Inf	0.646479	1
98003095	0.431131	0.285223	0.577039	2.02311	1.01658	1	1
98003096	0.81369	0	1.62738	Inf	Inf	0.254135	1
98003097	1.60492	1.28183	1.928	1.5041	0.588902	0.887241	1
98003099	459.423	441.509	477.337	1.08115	0.112565	0.78738	1
98003101	2.03213	1.90825	2.15601	1.12984	0.176114	1	1
98003104	14.0185	8.49782	19.5391	2.29931	1.2012	0.051982	1
98003105	0.4939	0.711383	0.276418	0.388564	-1.36378	0.968121	1
98003106	0.435534	0.570447	0.300621	0.526992	-0.924147	0.966891	1
98003107	0.138209	0	0.276418	Inf	Inf	1	1
98003110	3.2654	2.90286	3.62793	1.24978	0.321671	0.843243	1
98003114	5.80866	4.79327	6.82405	1.42367	0.509617	0.528328	1
98003115	2.93879	1.6935	4.18409	2.47068	1.30491	0.553174	1
98003116	0.342046	0	0.684093	Inf	Inf	0.640324	1
98003118	0.458666	0.640915	0.276418	0.431286	-1.21328	0.973516	1
98003119	310.813	297.357	324.27	1.09051	0.124997	0.815131	1
98003120	175.715	182.919	168.511	0.921232	-0.118364	0.783442	1
98003121	0.689644	1.37929	0	0	#NAME?	0.346218	1
[truncated: 44,941 more rows]
